# Supplementary material
Source: publisher figshare collection journal article supplement (https://acs.figshare.com/ndownloader/files/7562977)
Supplement: Supplementary file 1 [file 7562977]

## Sheet: Tabelle1
T: Protein IDs	T: Majority protein IDs	T: Protein names	T: Fasta headers	N: t-test Difference	N: -Log t-test p-value	Ratio H/L normalized 1	Ratio H/L normalized 2	Ratio H/L normalized 3	C: t-test Significant	N: Peptides	N: Razor + unique peptides	N: Unique peptides	N: Sequence coverage [%]	N: Unique + razor sequence coverage [%]	N: Unique sequence coverage [%]	N: Q-value	N: Score	N: Peptide counts (all)	N: Peptide counts (razor+unique)	N: Peptide counts (unique)	N: Peptides 1	N: Peptides 2	N: Peptides 3	N: Razor + unique peptides 1	N: Razor + unique peptides 2	N: Razor + unique peptides 3	N: Unique peptides 1	N: Unique peptides 2	N: Unique peptides 3	N: Ratio H/L	N: Ratio H/L normalized	N: Ratio H/L variability [%]	N: Ratio H/L count	N: Ratio H/L iso-count	N: Ratio H/L 1	N: Ratio H/L variability [%] 1	N: Ratio H/L count 1	N: Ratio H/L iso-count 1	N: Ratio H/L 2	N: Ratio H/L variability [%] 2	N: Ratio H/L count 2	N: Ratio H/L iso-count 2	N: Ratio H/L 3	N: Ratio H/L variability [%] 3	N: Ratio H/L count 3	N: Ratio H/L iso-count 3	N: Sequence coverage 1 [%]	N: Sequence coverage 2 [%]	N: Sequence coverage 3 [%]
O05204	O05204	Alkyl hydroperoxide reductase subunit F	>sp|O05204|AHPF_STAA8 Alkyl hydroperoxide reductase subunit F OS=Staphylococcus aureus (strain NCTC 8325) GN=ahpF PE=3 SV=1	-0.189848	0.608314	0.00762616	-0.397638	-0.179531		22	22	22	49.3	49.3	49.3	0	323.31	22	22	22	21	20	20	21	20	20	21	20	20	0.92838	0.89122	37.238	58	0	1.5465	30.581	17	0	0.79845	37.968	20	0	0.8497	32.43	21	0	48.7	44.2	44.2
O06446	O06446	Protein translocase subunit SecA 1	>sp|O06446|SECA1_STAA8 Protein translocase subunit SecA 1 OS=Staphylococcus aureus (strain NCTC 8325) GN=secA1 PE=1 SV=2	0.0419859	0.8177	0.0680517	0.0518593	0.0060466		33	33	33	43.4	43.4	43.4	0	159.01	33	33	33	23	23	27	23	23	27	23	23	27	1.0568	1.0411	30.699	41	0	1.506	31.454	13	0	1.0372	18.53	12	0	0.97143	37.394	16	0	31.1	31	37.4
O07325	O07325	Cell division protein FtsA	>sp|O07325|FTSA_STAA8 Cell division protein FtsA OS=Staphylococcus aureus (strain NCTC 8325) GN=ftsA PE=1 SV=2	0.0781378	0.531634	-0.0327133	0.134221	0.132906		21	21	21	53	53	53	0	225.13	21	21	21	17	18	19	17	18	19	17	18	19	1.1471	1.036	34.651	47	0	1.4167	21.714	16	0	1.1121	17.563	15	0	1.0416	53.867	16	0	51.1	46.6	52.8
O34090	O34090	Porphobilinogen deaminase	>sp|O34090|HEM3_STAA8 Porphobilinogen deaminase OS=Staphylococcus aureus (strain NCTC 8325) GN=hemC PE=3 SV=1	0.218689	1.36841	0.214747	0.301588	0.139731		6	6	6	21.1	21.1	21.1	0	15.031	6	6	6	6	5	4	6	5	4	6	5	4	1.2517	1.1411	13.458	9	0	1.5912	15.325	3	0	1.2517	9.8226	3	0	1.0237	15.509	3	0	21.1	18.8	15.9
O52582	O52582	Coenzyme A disulfide reductase	>sp|O52582|CDR_STAA8 Coenzyme A disulfide reductase OS=Staphylococcus aureus (strain NCTC 8325) GN=cdr PE=1 SV=3	-0.0334377	0.293474	-0.117287	0.00805652	0.00891703		27	27	27	72.6	72.6	72.6	0	323.31	27	27	27	25	26	25	25	26	25	25	26	25	1.1024	0.98118	44.278	79	0	1.3772	22.017	24	0	1.0643	48.091	28	0	0.94379	54.768	27	0	68.9	66.2	67.4
P02976	P02976	Immunoglobulin G-binding protein A	>sp|P02976|SPA_STAA8 Immunoglobulin G-binding protein A OS=Staphylococcus aureus (strain NCTC 8325) GN=spa PE=1 SV=3	0.0136312	0.0137061	-0.597169	0.225768	0.412294		30	30	30	53.5	53.5	53.5	0	323.31	30	30	30	28	22	26	28	22	26	28	22	26	1.0677	0.85558	49.736	71	0	0.99332	20.81	24	0	1.2259	41.727	24	0	1.272	58.313	23	0	51.2	51.2	53.5
P0A086	P0A086	Peptide methionine sulfoxide reductase MsrA 2	>sp|P0A086|MSRA2_STAA8 Peptide methionine sulfoxide reductase MsrA 2 OS=Staphylococcus aureus (strain NCTC 8325) GN=msrA2 PE=1 SV=1	0.0566062	0.254716	-0.075824	0.203139	0.0425042		9	9	9	50.3	50.3	50.3	0	84.303	9	9	9	9	8	8	9	8	8	9	8	8	1.1293	1.0138	19.07	26	0	1.3421	22.211	9	0	1.1884	23.074	7	0	1.0021	12.399	10	0	50.3	50.3	50.3
P0A088	P0A088	Peptide methionine sulfoxide reductase MsrB	>sp|P0A088|MSRB_STAA8 Peptide methionine sulfoxide reductase MsrB OS=Staphylococcus aureus (strain NCTC 8325) GN=msrB PE=1 SV=1	0.34027	0.674675	0.660107	0.0102069	0.350497		6	6	6	65.5	65.5	65.5	0	56.567	6	6	6	5	6	6	5	6	6	5	6	6	1.2334	1.1973	38.097	19	0	2.2891	19.445	7	0	1.0273	23.828	5	0	1.2121	47.473	7	0	43	65.5	65.5
P0A0B7	P0A0B7	Alkyl hydroperoxide reductase subunit C	>sp|P0A0B7|AHPC_STAA8 Alkyl hydroperoxide reductase subunit C OS=Staphylococcus aureus (strain NCTC 8325) GN=ahpC PE=1 SV=1	-0.0943292	0.29625	0.138159	-0.237115	-0.184031		17	17	17	79.4	79.4	79.4	0	323.31	17	17	17	14	14	16	14	14	16	14	14	16	0.99654	0.92308	35.606	79	0	1.5649	24.688	27	0	0.91976	30.871	23	0	0.85783	41.467	29	0	75.1	70.9	75.1
P0A0F4	P0A0F4	50S ribosomal protein L11	>sp|P0A0F4|RL11_STAA8 50S ribosomal protein L11 OS=Staphylococcus aureus (strain NCTC 8325) GN=rplK PE=3 SV=2	-0.0789749	0.13054	0.213752	0.0299829	-0.480659		10	10	10	57.9	57.9	57.9	0	95.013	10	10	10	6	8	10	6	8	10	6	8	10	1.1188	1.0577	40.798	14	0	1.7387	5.5543	4	0	1.0496	49.493	5	0	0.67847	43.014	5	0	40.7	52.9	57.9
P0A0F8	P0A0F8	50S ribosomal protein L15	>sp|P0A0F8|RL15_STAA8 50S ribosomal protein L15 OS=Staphylococcus aureus (strain NCTC 8325) GN=rplO PE=3 SV=1	0.237414	0.401224	0.676899	-0.0380656	0.0734089		11	11	11	70.5	70.5	70.5	0	79.265	11	11	11	8	7	9	8	7	9	8	7	9	1.2522	1.3193	49.696	25	0	2.2036	18.082	8	0	0.95488	38.73	8	0	1.0243	56.283	9	0	63	56.8	65.8
P0A0G2	P0A0G2	50S ribosomal protein L30	>sp|P0A0G2|RL30_STAA8 50S ribosomal protein L30 OS=Staphylococcus aureus (strain NCTC 8325) GN=rpmD PE=3 SV=1	-0.174324	0.180561	0.486869	-0.361787	-0.648055		10	10	10	91.5	91.5	91.5	0	71.446	10	10	10	9	9	9	9	9	9	9	9	9	0.97472	0.99733	63.508	23	0	1.9604	38.211	6	0	0.77498	34.209	8	0	0.58761	84.64	9	0	91.5	91.5	91.5
P0A0H0	P0A0H0	30S ribosomal protein S12	>sp|P0A0H0|RS12_STAA8 30S ribosomal protein S12 OS=Staphylococcus aureus (strain NCTC 8325) GN=rpsL PE=3 SV=1	-0.154572	0.730881	-0.281702	-0.169144	-0.0128684		8	8	8	32.8	32.8	32.8	0	36.06	8	8	8	4	6	8	4	6	8	4	6	8	1.0143	0.89301	21.376	20	0	1.1812	28.132	8	0	0.94844	17.692	6	0	0.96808	14.777	6	0	22.6	24.8	32.8
P0A0J0	P0A0J0	RNA polymerase sigma factor SigA	>sp|P0A0J0|SIGA_STAA8 RNA polymerase sigma factor SigA OS=Staphylococcus aureus (strain NCTC 8325) GN=sigA PE=1 SV=1	-0.450136	0.40188	0.384934	-0.782546	-0.952797		6	6	6	26.4	26.4	26.4	0	74.04	6	6	6	6	6	5	6	6	5	6	6	5	0.89498	0.82635	54.543	18	0	1.8315	49.576	8	0	0.58754	22.84	4	0	0.50257	34.175	6	0	26.4	26.4	19.6
P0A0J3	P0A0J3	Superoxide dismutase [Mn] 1	>sp|P0A0J3|SODM1_STAA8 Superoxide dismutase [Mn] 1 OS=Staphylococcus aureus (strain NCTC 8325) GN=sodA PE=1 SV=1	-0.337981	0.844815	-0.0793256	-0.358916	-0.575701		10	10	10	65.8	65.8	65.8	0	92.782	10	10	10	7	7	10	7	7	10	7	7	10	0.79947	0.76657	32.297	16	0	1.4307	31.922	5	0	0.76086	9.9687	5	0	0.64054	34.887	6	0	43.2	44.2	65.8
P0A0K3	P0A0K3	Uncharacterized protein SAOUHSC_02013	>sp|P0A0K3|Y2013_STAA8 Uncharacterized protein SAOUHSC_02013 OS=Staphylococcus aureus (strain NCTC 8325) GN=SAOUHSC_02013 PE=3 SV=1	-0.155573	0.356769	-0.472509	-0.0606079	0.0663992		3	3	3	21.1	21.1	21.1	0	13.943	3	3	3	2	3	3	2	3	3	2	3	3	0.92863	0.85101	20.53	3	0	0.98815	74.459	4	3	0.99233	69.304	4	3	0.99123	76.645	5	4	19.9	21.1	21.1
P0C0V7	P0C0V7	Phosphoglucosamine mutase	>sp|P0C0V7|GLMM_STAA8 Phosphoglucosamine mutase OS=Staphylococcus aureus (strain NCTC 8325) GN=glmM PE=1 SV=1	-0.108508	0.0997588	0.616828	-0.387166	-0.555185		19	19	19	40.1	40.1	40.1	0	120.42	19	19	19	15	16	14	15	16	14	15	16	14	0.91838	0.86345	46.087	42	0	2.3368	39.023	14	0	0.78281	25.747	15	0	0.64667	40.136	13	0	30.4	40.1	31
P47768	P47768	DNA-directed RNA polymerase subunit beta	>sp|P47768|RPOB_STAA8 DNA-directed RNA polymerase subunit beta OS=Staphylococcus aureus (strain NCTC 8325) GN=rpoB PE=3 SV=2	-0.152519	1.76152	-0.189911	-0.119965	-0.147681		102	102	102	81.9	81.9	81.9	0	323.31	102	102	102	82	95	91	82	95	91	82	95	91	1.0138	0.90158	39.148	292	0	1.3309	24.466	91	0	0.95974	40.103	100	0	0.84703	47.992	101	0	76.6	76.9	75.8
P48860	P48860	50S ribosomal protein L7/L12	>sp|P48860|RL7_STAA8 50S ribosomal protein L7/L12 OS=Staphylococcus aureus (strain NCTC 8325) GN=rplL PE=3 SV=2	-0.0800207	0.0433945	1.0072	-1.03121	-0.216049		10	10	10	87.7	87.7	87.7	0	136.9	10	10	10	8	10	9	8	10	9	8	10	9	0.88654	0.84795	80.181	27	0	3.0058	40.805	8	0	0.5388	54.604	9	0	0.82817	75.61	10	0	81.1	87.7	87.7
P48940	P48940	30S ribosomal protein S7	>sp|P48940|RS7_STAA8 30S ribosomal protein S7 OS=Staphylococcus aureus (strain NCTC 8325) GN=rpsG PE=3 SV=2	-0.027076	0.0203608	0.790355	-0.287536	-0.584047		10	10	10	53.2	53.2	53.2	0	118.2	10	10	10	10	9	10	10	9	10	10	9	10	0.94793	0.90325	56.169	27	0	2.6056	41.622	8	0	0.84692	38.174	10	0	0.63277	51.909	9	0	53.2	53.2	53.2
P60070	P60070	Anti-sigma-B factor antagonist	>sp|P60070|RSBV_STAA8 Anti-sigma-B factor antagonist OS=Staphylococcus aureus (strain NCTC 8325) GN=rsbV PE=3 SV=1	-0.202549	0.104444	NaN	-0.782943	0.377846		3	3	3	31.5	31.5	31.5	0	11.921	3	3	3	2	2	3	2	2	3	2	2	3	1.0422	1.0485	49.166	3	0	NaN	NaN	1	0	0.57691	83.45	2	1	1.2677	56.368	4	3	20.4	20.4	31.5
P60393	P60393	Ribosomal RNA small subunit methyltransferase H	>sp|P60393|RSMH_STAA8 Ribosomal RNA small subunit methyltransferase H OS=Staphylococcus aureus (strain NCTC 8325) GN=rsmH PE=3 SV=1	0.15431	0.267384	-0.116958	0.569394	0.0104934		9	9	9	28.6	28.6	28.6	0	20.234	9	9	9	7	5	5	7	5	5	7	5	5	1.2872	1.0073	32.984	11	0	1.2872	11.486	5	0	1.4757	16.673	3	0	0.97315	57.539	3	0	22.8	15.8	17
P60430	P60430	50S ribosomal protein L2	>sp|P60430|RL2_STAA8 50S ribosomal protein L2 OS=Staphylococcus aureus (strain NCTC 8325) GN=rplB PE=3 SV=1	0.00239431	0.00534626	0.101381	-0.270904	0.176706		22	22	22	71.1	71.1	71.1	0	302.35	22	22	22	18	18	19	18	18	19	18	18	19	1.0742	0.96567	37.962	55	0	1.5968	28.469	20	0	0.88345	29.606	18	0	1.0664	44.329	17	0	58.8	52.7	61.4
P95689	P95689	Serine--tRNA ligase	>sp|P95689|SYS_STAA8 Serine--tRNA ligase OS=Staphylococcus aureus (strain NCTC 8325) GN=serS PE=3 SV=1	-0.172654	0.918872	-0.294969	-0.0681808	-0.154811		29	29	29	64.3	64.3	64.3	0	263.15	29	29	29	24	26	27	24	26	27	24	26	27	1.0104	0.92977	38.159	56	0	1.2107	34.838	17	0	1.0175	37.867	19	0	0.83937	39.89	20	0	52.1	62.4	64
Q05615	Q05615	3-phosphoshikimate 1-carboxyvinyltransferase	>sp|Q05615|AROA_STAA8 3-phosphoshikimate 1-carboxyvinyltransferase OS=Staphylococcus aureus (strain NCTC 8325) GN=aroA PE=3 SV=2	-0.294242	0.348623	-0.0444491	NaN	-0.544035		6	6	6	22.2	22.2	22.2	0	42.986	6	6	6	4	3	5	4	3	5	4	3	5	0.73236	0.79641	23.923	7	0	1.4732	22.93	3	1	NaN	NaN	1	0	0.62693	24.055	4	0	15.3	11.8	19.4
Q2FUQ2	Q2FUQ2	tRNA modification GTPase MnmE	>sp|Q2FUQ2|MNME_STAA8 tRNA modification GTPase MnmE OS=Staphylococcus aureus (strain NCTC 8325) GN=mnmE PE=3 SV=1	-0.506757	1.14458	-0.793682	-0.369837	-0.356753		10	10	10	26.6	26.6	26.6	0	26.067	10	10	10	8	6	8	8	6	8	8	6	8	0.76825	0.67939	32.076	12	0	0.84197	16.103	4	0	0.75964	7.6689	3	0	0.76	47.773	5	0	22.9	14.4	22.7
Q2FUQ3	Q2FUQ3	tRNA uridine 5-carboxymethylaminomethyl modification enzyme MnmG	>sp|Q2FUQ3|MNMG_STAA8 tRNA uridine 5-carboxymethylaminomethyl modification enzyme MnmG OS=Staphylococcus aureus (strain NCTC 8325) GN=mnmG PE=3 SV=2	0.0880505	0.626272	0.107822	0.167743	-0.0114134		14	14	14	28.3	28.3	28.3	0	82.836	14	14	14	13	11	10	13	11	10	13	11	10	1.1305	1.0704	20.304	23	0	1.4899	24.618	8	0	1.1311	22.602	8	0	0.93387	11.475	7	0	26.1	24.2	19.5
Q2FUQ4	Q2FUQ4	Ribosomal RNA small subunit methyltransferase G	>sp|Q2FUQ4|RSMG_STAA8 Ribosomal RNA small subunit methyltransferase G OS=Staphylococcus aureus (strain NCTC 8325) GN=rsmG PE=3 SV=1	-0.0375329	0.29274	NaN	0.00115371	-0.0762195		4	4	4	20.1	20.1	20.1	0	11.944	4	4	4	1	3	2	1	3	2	1	3	2	1.28	1.0346	17.101	3	0	NaN	NaN	1	0	0.99344	40.249	3	2	0.92476	38.475	4	3	3.3	16.7	10.5
Q2FUR8	Q2FUR8	Putative uncharacterized protein	>tr|Q2FUR8|Q2FUR8_STAA8 Putative uncharacterized protein OS=Staphylococcus aureus (strain NCTC 8325) GN=SAOUHSC_03034 PE=3 SV=1	0.238033	0.680289	0.493237	0.066537	0.154324		8	8	8	34.8	34.8	34.8	0	47.884	8	8	8	6	6	4	6	6	4	6	6	4	1.3728	1.3506	51.173	13	0	2.0927	14.116	5	0	1.1009	48.265	4	0	1.056	74.041	4	0	31.8	25.8	22.7
Q2FUS2	Q2FUS2	Sodium, sulfate symporter, putative	>tr|Q2FUS2|Q2FUS2_STAA8 Sodium, sulfate symporter, putative OS=Staphylococcus aureus (strain NCTC 8325) GN=SAOUHSC_03030 PE=4 SV=1	-0.141229	0.415604	-0.0988609	-0.380578	0.0557509		3	3	3	7	7	7	0	12.864	3	3	3	3	3	2	3	3	2	3	3	2	0.99602	0.89064	24.859	6	0	1.3962	75.968	4	2	0.79704	60.508	3	1	0.99602	5.7348	2	0	7	7	4.4
Q2FUS8	Q2FUS8	Lactonase drp35	>sp|Q2FUS8|DRP35_STAA8 Lactonase drp35 OS=Staphylococcus aureus (strain NCTC 8325) GN=drp35 PE=3 SV=2	0.356893	0.633886	0.00187425	0.337882	0.730923		10	10	10	38.6	38.6	38.6	0	15.266	10	10	10	6	3	7	6	3	7	6	3	7	1.3354	1.1424	22.207	8	0	1.3865	3.8628	3	0	1.245	34.742	3	1	1.55	23.833	3	0	22.5	7.7	31.2
Q2FUS9	Q2FUS9	UPF0312 protein SAOUHSC_03022	>sp|Q2FUS9|Y3022_STAA8 UPF0312 protein SAOUHSC_03022 OS=Staphylococcus aureus (strain NCTC 8325) GN=SAOUHSC_03022 PE=3 SV=1	-0.186654	0.304269	NaN	-0.371142	-0.00216568		5	5	5	45.6	45.6	45.6	0	46.009	5	5	5	3	2	2	3	2	2	3	2	2	1.1435	1.1664	66.616	6	4	NaN	NaN	1	0	0.78749	80.131	2	1	0.97415	74.808	3	3	30.4	15.2	22.8
Q2FUT6	Q2FUT6	ATP phosphoribosyltransferase regulatory subunit	>sp|Q2FUT6|HISZ_STAA8 ATP phosphoribosyltransferase regulatory subunit OS=Staphylococcus aureus (strain NCTC 8325) GN=hisZ PE=3 SV=1	-0.152411	0.717991	-0.0112099	-0.282158	-0.163866		6	6	6	23.9	23.9	23.9	0	16.72	6	6	6	4	6	6	4	6	6	4	6	6	1.0698	0.94635	25.562	15	0	1.3115	11.839	4	0	0.81667	23.849	6	0	0.84196	34.509	5	0	14.7	23.9	23.9
Q2FUT8	Q2FUT8	Histidinol dehydrogenase	>tr|Q2FUT8|Q2FUT8_STAA8 Histidinol dehydrogenase OS=Staphylococcus aureus (strain NCTC 8325) GN=hisD PE=3 SV=1	0.00117161	0.00273821	-0.248759	0.0535284	0.198746		6	6	6	16.1	16.1	16.1	0	17.731	6	6	6	6	5	5	6	5	5	6	5	5	1.137	0.94793	24.344	11	0	1.2408	16.937	5	0	1.0858	21.675	3	0	1.127	34.926	3	0	16.1	13	13
Q2FUU2	Q2FUU2	1-(5-phosphoribosyl)-5-[(5-phosphoribosylamino)methylideneamino] imidazole-4-carboxamide isomerase	>sp|Q2FUU2|HIS4_STAA8 1-(5-phosphoribosyl)-5-[(5-phosphoribosylamino)methylideneamino] imidazole-4-carboxamide isomerase OS=Staphylococcus aureus (strain NCTC 8325) GN=hisA PE=3 SV=1	-0.300139	0.28601	0.0170667	NaN	-0.617344		4	4	4	18.8	18.8	18.8	0	2.6103	4	4	4	2	2	4	2	2	4	2	2	4	1.0765	0.90874	44.79	5	0	1.3716	15.206	2	0	NaN	NaN	1	0	0.60688	76.156	2	0	9	9.4	18.8
Q2FUU5	Q2FUU5	Lipase 1	>sp|Q2FUU5|LIP1_STAA8 Lipase 1 OS=Staphylococcus aureus (strain NCTC 8325) GN=lipA PE=1 SV=1	1.18979	0.183244	-0.791907	3.17148	NaN		11	9	9	21.6	18.2	18.2	0	38.695	11	9	9	5	9	5	3	8	3	3	8	3	7.679	7.7695	160.91	7	5	0.78781	59.744	3	1	9.0431	30.537	4	4	NaN	NaN	0	0	10.1	18.2	9.7
Q2FUW0	Q2FUW0	Putative uncharacterized protein	>tr|Q2FUW0|Q2FUW0_STAA8 Putative uncharacterized protein OS=Staphylococcus aureus (strain NCTC 8325) GN=SAOUHSC_02991 PE=4 SV=1	-0.0107805	0.0669018	0.0945064	-0.0553964	-0.0714515		5	5	5	28.7	28.7	28.7	0	8.3642	5	5	5	4	5	4	4	5	4	4	5	4	0.99349	0.95168	33.234	10	0	1.4686	12.913	4	2	0.99518	31.15	4	0	0.9013	47.522	4	0	21.7	28.7	21.7
Q2FUX0	Q2FUX0	PTS system, fructose-specific IIABC component, putative	>tr|Q2FUX0|Q2FUX0_STAA8 PTS system, fructose-specific IIABC component, putative OS=Staphylococcus aureus (strain NCTC 8325) GN=SAOUHSC_02975 PE=4 SV=1	0.438403	0.971233	NaN	0.364124	0.512682		3	3	3	7.7	7.7	7.7	0	54.944	3	3	3	1	2	3	1	2	3	1	2	3	0.88515	0.88968	25.401	3	0	NaN	NaN	1	0	1.2975	52.222	2	1	1.3602	77.123	2	1	2.8	4.9	7.7
Q2FUX3	Q2FUX3	Immunodominant staphylococcal antigen B	>sp|Q2FUX3|ISAB_STAA8 Immunodominant staphylococcal antigen B OS=Staphylococcus aureus (strain NCTC 8325) GN=isaB PE=2 SV=1	0.0324581	0.0746653	0.312549	-0.161621	-0.0535536		6	6	6	34.3	34.3	34.3	0	112.76	6	6	6	6	6	6	6	6	6	6	6	6	1.0215	1.0413	48.437	14	0	1.86	7.8375	4	0	0.97201	38.112	5	0	0.93346	68.11	5	0	34.3	34.3	34.3
Q2FUY3	Q2FUY3	Tributyrin esterase, putative	>tr|Q2FUY3|Q2FUY3_STAA8 Tributyrin esterase, putative OS=Staphylococcus aureus (strain NCTC 8325) GN=SAOUHSC_02962 PE=4 SV=1	0.225257	1.21511	0.218595	0.127765	0.329411		8	8	8	39.5	39.5	39.5	0	79.065	8	8	8	6	8	7	6	8	7	6	8	7	1.227	1.1678	28.051	16	0	1.5983	21.12	5	0	1.1904	35.61	5	0	1.2113	29.105	6	0	36.4	39.5	36.4
Q2FUZ8	Q2FUZ8	Sulfite reductase [NADPH] flavoprotein alpha-component	>tr|Q2FUZ8|Q2FUZ8_STAA8 Sulfite reductase [NADPH] flavoprotein alpha-component OS=Staphylococcus aureus (strain NCTC 8325) GN=SAOUHSC_02947 PE=4 SV=1	-0.272714	1.58527	-0.191112	-0.281299	-0.345729		11	11	11	18.7	18.7	18.7	0	34.243	11	11	11	8	9	8	8	9	8	8	9	8	0.85823	0.81527	16.775	11	0	1.2444	17.402	3	0	0.8434	17.792	4	0	0.74074	19.823	4	0	15.2	16.5	15.2
Q2FV10	Q2FV10	Betaine-aldehyde dehydrogenase	>tr|Q2FV10|Q2FV10_STAA8 Betaine-aldehyde dehydrogenase OS=Staphylococcus aureus (strain NCTC 8325) GN=SAOUHSC_02933 PE=3 SV=1	-0.0404375	0.29523	-0.114769	0.0557509	-0.062294		12	12	12	28.6	28.6	28.6	0	195.56	12	12	12	10	7	10	10	7	10	10	7	10	1.0441	0.97408	18.623	18	0	1.3509	16.491	5	0	1.0441	19.487	6	0	0.91851	20.784	7	0	28.2	19	23.6
Q2FV11	Q2FV11	Oxygen-dependent choline dehydrogenase	>sp|Q2FV11|BETA_STAA8 Oxygen-dependent choline dehydrogenase OS=Staphylococcus aureus (strain NCTC 8325) GN=betA PE=3 SV=1	0.282448	1.13734	0.121413	0.373286	0.352646		10	10	10	25.5	25.5	25.5	0	23.129	10	10	10	7	7	8	7	7	8	7	7	8	1.3155	1.2312	19.071	14	0	1.4705	8.9061	4	0	1.248	25.515	5	0	1.219	11.755	5	0	17.2	17.8	20
Q2FV14	Q2FV14	Acetyl-CoA synthetase, putative	>tr|Q2FV14|Q2FV14_STAA8 Acetyl-CoA synthetase, putative OS=Staphylococcus aureus (strain NCTC 8325) GN=SAOUHSC_02929 PE=4 SV=1	-0.0357083	0.511392	-0.0863082	0.00230651	-0.0231232		25	25	25	54.9	54.9	54.9	0	206.8	25	25	25	22	22	24	22	22	24	22	22	24	1.1014	0.99348	29.753	67	0	1.3863	27.258	20	0	1.0714	31.589	23	0	0.9483	31.086	24	0	49.4	50.8	54.9
Q2FV16	Q2FV16	Probable malate:quinone oxidoreductase	>tr|Q2FV16|Q2FV16_STAA8 Probable malate:quinone oxidoreductase OS=Staphylococcus aureus (strain NCTC 8325) GN=mqo PE=3 SV=1	-0.0661479	0.335088	0.03492	-0.0246192	-0.208744		39	39	39	75.7	75.7	75.7	0	323.31	39	39	39	33	37	38	33	37	38	33	37	38	1.0796	0.97358	34.915	140	0	1.4589	25.272	43	0	1.0601	32.771	48	0	0.83415	43.016	49	0	68.9	75.7	75.7
Q2FV17	Q2FV17	Fructose-bisphosphate aldolase class 1	>sp|Q2FV17|ALF1_STAA8 Fructose-bisphosphate aldolase class 1 OS=Staphylococcus aureus (strain NCTC 8325) GN=fda PE=3 SV=1	-0.0504133	0.0407507	0.689031	-0.667813	-0.172457		28	28	28	84.1	84.1	84.1	0	323.31	28	28	28	26	23	24	26	23	24	26	23	24	0.89317	0.91252	54.976	87	0	2.3917	29.913	30	0	0.68008	41.912	29	0	0.84702	40.301	28	0	82.8	74.7	84.1
Q2FV21	Q2FV21	3-methyl-2-oxobutanoate hydroxymethyltransferase	>sp|Q2FV21|PANB_STAA8 3-methyl-2-oxobutanoate hydroxymethyltransferase OS=Staphylococcus aureus (strain NCTC 8325) GN=panB PE=3 SV=2	0.281577	0.496756	0.709026	0.0812032	0.0545011		9	9	9	41.9	41.9	41.9	0	93.298	9	9	9	7	9	6	7	9	6	7	9	6	1.1943	1.1814	25.996	12	0	2.3768	5.0295	3	0	1.0655	18.547	5	0	1.0038	22.08	4	0	27.9	41.9	27.6
Q2FV24	Q2FV24	Putative uncharacterized protein	>tr|Q2FV24|Q2FV24_STAA8 Putative uncharacterized protein OS=Staphylococcus aureus (strain NCTC 8325) GN=SAOUHSC_02915 PE=4 SV=1	-0.313297	1.0946	-0.222986	-0.214357	-0.502546		17	17	17	37.7	37.7	37.7	0	90.945	17	17	17	11	14	11	11	14	11	11	14	11	0.84343	0.83757	12.384	16	0	1.1646	9.3275	5	0	0.84224	9.107	5	0	0.66368	13.845	6	0	21.4	33.2	26.6
Q2FV27	Q2FV27	Putative uncharacterized protein	>tr|Q2FV27|Q2FV27_STAA8 Putative uncharacterized protein OS=Staphylococcus aureus (strain NCTC 8325) GN=SAOUHSC_02912 PE=4 SV=1	-0.116634	1.15885	-0.0846244	-0.181493	-0.0837833		7	7	7	59.1	59.1	59.1	0	107.08	7	7	7	6	5	6	6	5	6	6	5	6	0.94364	0.91499	40.721	19	0	1.3518	28.903	7	0	0.89374	56.371	5	0	0.91188	43.999	7	0	47	47	59.1
Q2FV34	Q2FV34	Putative uncharacterized protein	>tr|Q2FV34|Q2FV34_STAA8 Putative uncharacterized protein OS=Staphylococcus aureus (strain NCTC 8325) GN=SAOUHSC_02905 PE=4 SV=1	-0.166192	0.726445	-0.322451	-0.0328167	-0.143309		5	5	5	61.2	61.2	61.2	0	86.254	5	5	5	4	4	5	4	4	5	4	4	5	0.99178	0.89774	28.381	10	0	1.0777	34.134	4	0	0.96366	24.166	3	0	0.84645	20.919	3	0	50	50	61.2
Q2FV39	Q2FV39	Uncharacterized hydrolase SAOUHSC_02900	>sp|Q2FV39|Y2900_STAA8 Uncharacterized hydrolase SAOUHSC_02900 OS=Staphylococcus aureus (strain NCTC 8325) GN=SAOUHSC_02900 PE=3 SV=1	-0.305462	0.201997	0.733181	-1.07516	-0.574412		7	7	7	39.1	39.1	39.1	0	64.237	7	7	7	7	4	5	7	4	5	7	4	5	0.65445	0.67156	119.08	7	0	2.4371	203.1	3	0	0.48231	20.619	3	2	0.65445	34.278	3	0	39.1	25.4	30.4
Q2FV40	Q2FV40	Putative uncharacterized protein	>tr|Q2FV40|Q2FV40_STAA8 Putative uncharacterized protein OS=Staphylococcus aureus (strain NCTC 8325) GN=SAOUHSC_02899 PE=4 SV=1	0.365537	0.353695	0.0603242	0.67075	NaN		5	5	5	16.7	16.7	16.7	0	13.857	5	5	5	4	3	1	4	3	1	4	3	1	1.2009	1.1546	15.272	3	0	1.3916	40.872	3	2	1.5689	45.421	2	1	NaN	NaN	1	0	14.3	7.7	3.3
Q2FV52	Q2FV52	Probable transglycosylase IsaA	>sp|Q2FV52|ISAA_STAA8 Probable transglycosylase IsaA OS=Staphylococcus aureus (strain NCTC 8325) GN=isaA PE=1 SV=1	0.109732	0.112146	0.0990932	0.690015	-0.459913		4	4	4	23.2	23.2	23.2	0	220.43	4	4	4	4	4	3	4	4	3	4	4	3	1.4019	1.1794	37.634	13	0	1.6172	14.773	4	0	1.6973	14.322	5	0	0.67875	25.275	4	0	23.2	23.2	19.3
Q2FV54	Q2FV54	O-acetyltransferase OatA	>sp|Q2FV54|OATA_STAA8 O-acetyltransferase OatA OS=Staphylococcus aureus (strain NCTC 8325) GN=oatA PE=3 SV=1	-0.17869	1.20547	-0.0916635	-0.25214	-0.192266		7	7	7	13.8	13.8	13.8	0	35.073	7	7	7	6	6	5	6	6	5	6	6	5	1.0079	0.93844	31.803	18	0	1.304	41.163	6	0	0.8319	25.592	6	0	0.82976	32.732	6	0	11.8	11.6	9.6
Q2FV59	Q2FV59	Dehydrosqualene synthase	>sp|Q2FV59|CRTM_STAA8 Dehydrosqualene synthase OS=Staphylococcus aureus (strain NCTC 8325) GN=crtM PE=1 SV=1	-0.791981	0.710005	-1.04243	NaN	-0.541534		1	1	1	4.5	4.5	4.5	0.0071556	1.2521	1	1	1	1	1	1	1	1	1	1	1	1	0.72079	0.61179	23.038	5	0	0.70134	16.886	2	0	NaN	NaN	1	0	0.64287	16.405	2	0	4.5	4.5	4.5
Q2FV61	Q2FV61	Putative uncharacterized protein	>tr|Q2FV61|Q2FV61_STAA8 Putative uncharacterized protein OS=Staphylococcus aureus (strain NCTC 8325) GN=SAOUHSC_02876 PE=1 SV=1	-0.346944	1.03804	NaN	-0.296669	-0.39722		3	3	3	7	7	7	0	4.3401	3	3	3	2	2	2	2	2	2	2	2	2	1.1135	1.1041	47.351	3	0	NaN	NaN	1	0	0.81871	43.092	2	1	0.72823	41.568	2	1	4.7	4.7	4.7
Q2FV62	Q2FV62	D-lactate dehydrogenase, putative	>tr|Q2FV62|Q2FV62_STAA8 D-lactate dehydrogenase, putative OS=Staphylococcus aureus (strain NCTC 8325) GN=SAOUHSC_02875 PE=3 SV=1	0.0587998	0.12677	0.0499095	0.338339	-0.211849		6	6	6	15.4	15.4	15.4	0	15.87	6	6	6	3	6	4	3	6	4	3	6	4	1.389	1.0352	34.32	7	0	1.5282	106.45	3	1	1.3405	15.267	3	0	0.81791	116.16	4	2	9	15.4	11.1
Q2FV63	Q2FV63	Copper chaperone CopZ	>sp|Q2FV63|COPZ_STAA8 Copper chaperone CopZ OS=Staphylococcus aureus (strain NCTC 8325) GN=copZ PE=1 SV=1	0.0802619	0.102302	-0.447013	0.378623	0.309176		3	3	3	88.2	88.2	88.2	0	16.182	3	3	3	3	2	2	3	2	2	3	2	2	1.298	1.297	47.69	7	0	1.056	77.054	3	0	1.3433	0.32969	2	0	1.1514	18.197	2	0	88.2	39.7	39.7
Q2FV64	Q2FV64	Copper-exporting P-type ATPase A	>sp|Q2FV64|COPA_STAA8 Copper-exporting P-type ATPase A OS=Staphylococcus aureus (strain NCTC 8325) GN=copA PE=1 SV=1	0.685947	1.25521	0.625925	0.745969	NaN		5	5	5	9.1	9.1	9.1	0	9.6619	5	5	5	4	3	1	4	3	1	4	3	1	1.2447	1.2738	55.839	7	5	2.0532	64.887	3	2	1.7223	67.893	3	2	NaN	NaN	1	1	7.5	5	2
Q2FV67	Q2FV67	1-pyrroline-5-carboxylate dehydrogenase	>sp|Q2FV67|ROCA_STAA8 1-pyrroline-5-carboxylate dehydrogenase OS=Staphylococcus aureus (strain NCTC 8325) GN=rocA PE=3 SV=1	-0.0986683	1.59536	-0.125384	-0.100654	-0.0699666		42	42	42	73.7	73.7	73.7	0	323.31	42	42	42	38	40	41	38	40	41	38	40	41	1.0428	0.93344	35.857	186	0	1.3786	18.495	59	0	1.0125	33.044	64	0	0.91588	48.931	63	0	71.6	72	73.7
Q2FV74	Q2FV74	ATP-dependent Clp protease ATP-binding subunit ClpL	>sp|Q2FV74|CLPL_STAA8 ATP-dependent Clp protease ATP-binding subunit ClpL OS=Staphylococcus aureus (strain NCTC 8325) GN=clpL PE=2 SV=1	-0.404259	0.292933	0.54962	-0.579577	-1.18282		7	7	7	14.6	14.6	14.6	0	7.3364	7	7	7	4	3	4	4	3	4	4	3	4	1.0675	0.93466	59.984	4	0	1.9904	7.2491	3	1	0.67611	4.481	2	1	0.43396	58.045	3	2	10.1	4.9	6.1
Q2FV76	Q2FV76	HMG-CoA synthase, putative	>tr|Q2FV76|Q2FV76_STAA8 HMG-CoA synthase, putative OS=Staphylococcus aureus (strain NCTC 8325) GN=SAOUHSC_02860 PE=4 SV=1	-0.0913749	0.75858	-0.168447	-0.01552	-0.0901578		20	20	20	54.1	54.1	54.1	0	323.31	20	20	20	17	16	19	17	16	19	17	16	19	1.0604	0.92544	37.187	45	0	1.3501	32.197	17	0	1.0501	35.543	14	0	0.89746	46.021	14	0	46.1	41.2	54.1
Q2FV77	Q2FV77	3-hydroxy-3-methylglutaryl coenzyme A reductase	>tr|Q2FV77|Q2FV77_STAA8 3-hydroxy-3-methylglutaryl coenzyme A reductase OS=Staphylococcus aureus (strain NCTC 8325) GN=SAOUHSC_02859 PE=3 SV=1	0.0239489	0.0548734	0.265437	-0.225126	0.0315363		10	10	10	30.4	30.4	30.4	0	77.454	10	10	10	7	8	6	7	8	6	7	8	6	0.97896	1.018	24.627	12	0	1.795	19.884	3	0	0.90872	25.78	5	0	0.96805	18.61	4	0	25.4	26.4	20.5
Q2FV86	Q2FV86	Pyruvate oxidase, putative	>tr|Q2FV86|Q2FV86_STAA8 Pyruvate oxidase, putative OS=Staphylococcus aureus (strain NCTC 8325) GN=SAOUHSC_02849 PE=3 SV=1	0.551025	0.807321	0.413377	NaN	0.688673		5	5	5	8.5	8.5	8.5	0	4.5194	5	5	5	4	2	2	4	2	2	4	2	2	1.6471	1.3714	98.27	7	6	1.8082	122.7	4	4	NaN	NaN	1	1	1.5199	69.25	2	1	6.6	3.6	3.5
Q2FV87	Q2FV87	PTS system glucoside-specific EIICBA component	>sp|Q2FV87|PTU3C_STAA8 PTS system glucoside-specific EIICBA component OS=Staphylococcus aureus (strain NCTC 8325) GN=glcB PE=3 SV=1	0.275005	0.596411	0.470407	-0.0704211	0.42503		14	11	11	20.1	17.7	17.7	0	39.7	14	11	11	12	10	10	9	8	8	9	8	8	1.2936	1.283	69.233	18	0	1.8982	12.001	7	0	0.94273	21.621	6	0	1.258	121.56	5	0	17	15.8	14.5
Q2FV90	Q2FV90	Putative uncharacterized protein	>tr|Q2FV90|Q2FV90_STAA8 Putative uncharacterized protein OS=Staphylococcus aureus (strain NCTC 8325) GN=SAOUHSC_02844 PE=4 SV=1	0.784999	1.34628	1.07032	0.81032	0.474358		8	8	8	30.4	30.4	30.4	0	109.06	8	8	8	6	7	7	6	7	7	6	7	7	1.7897	1.7419	61.55	11	0	2.7449	144.64	7	5	1.7897	16.392	5	0	1.3334	101.73	4	0	23	26.4	27.6
Q2FVA3	Q2FVA3	D-lactate dehydrogenase, putative	>tr|Q2FVA3|Q2FVA3_STAA8 D-lactate dehydrogenase, putative OS=Staphylococcus aureus (strain NCTC 8325) GN=SAOUHSC_02830 PE=3 SV=1	-0.31181	0.561914	0.00187425	-0.22945	-0.707854		19	19	19	55.9	55.9	55.9	0	101.5	19	19	19	18	15	15	18	15	15	18	15	15	0.94423	0.88194	37.83	40	0	1.4143	12.114	14	0	0.89043	26.492	15	0	0.58605	53.973	11	0	53.3	41.6	46
Q2FVA4	Q2FVA4	Putative NAD(P)H nitroreductase SAOUHSC_02829	>sp|Q2FVA4|Y2829_STAA8 Putative NAD(P)H nitroreductase SAOUHSC_02829 OS=Staphylococcus aureus (strain NCTC 8325) GN=SAOUHSC_02829 PE=3 SV=1	-0.479219	1.11811	-0.247936	-0.456861	-0.73286		12	12	12	49.3	49.3	49.3	0	154.33	12	12	12	10	11	9	10	11	9	10	11	9	0.89462	0.78213	40.513	25	0	1.255	23.904	8	0	0.74509	37.434	9	0	0.57347	54.584	8	0	48	48	43
Q2FVA5	Q2FVA5	Putative uncharacterized protein	>tr|Q2FVA5|Q2FVA5_STAA8 Putative uncharacterized protein OS=Staphylococcus aureus (strain NCTC 8325) GN=SAOUHSC_02828 PE=4 SV=1	0.0384477	0.0620116	NaN	-0.142815	0.219711		5	5	5	25.4	25.4	25.4	0	23.906	5	5	5	3	2	3	3	2	3	3	2	3	0.91095	0.86544	48.711	4	0	NaN	NaN	1	0	0.91095	44.83	2	0	1.1069	137.62	4	3	19	8.2	18.3
Q2FVA6	Q2FVA6	Putative uncharacterized protein	>tr|Q2FVA6|Q2FVA6_STAA8 Putative uncharacterized protein OS=Staphylococcus aureus (strain NCTC 8325) GN=SAOUHSC_02827 PE=4 SV=1	0.519401	1.89014	0.45249	0.63812	0.467592		5	5	5	74.5	74.5	74.5	0	117.6	5	5	5	5	3	4	5	3	4	5	3	4	1.5403	1.4285	33.181	13	0	1.7989	30.635	5	0	1.5734	28.155	4	0	1.3201	46.008	4	0	74.5	40.4	58.5
Q2FVB2	Q2FVB2	Fructose-1,6-bisphosphatase class 3	>sp|Q2FVB2|F16PC_STAA8 Fructose-1,6-bisphosphatase class 3 OS=Staphylococcus aureus (strain NCTC 8325) GN=fbp PE=3 SV=1	-0.197115	0.949864	-0.324618	-0.192315	-0.0744107		40	40	40	58.7	58.7	58.7	0	323.31	40	40	40	35	36	37	35	36	37	35	36	37	0.95367	0.8538	26.755	94	0	1.1878	24.564	30	0	0.93049	28.378	34	0	0.90529	26.457	30	0	55.2	55.8	54.1
Q2FVB4	Q2FVB4	Putative uncharacterized protein	>tr|Q2FVB4|Q2FVB4_STAA8 Putative uncharacterized protein OS=Staphylococcus aureus (strain NCTC 8325) GN=SAOUHSC_02820 PE=3 SV=1	-0.119687	0.116293	0.576474	-0.40152	-0.534015		10	10	10	42.4	42.4	42.4	0	49.981	10	10	10	10	9	10	10	9	10	10	9	10	0.78706	0.76889	47.329	17	0	2.2046	27.408	6	0	0.75195	24.95	5	0	0.65857	34.061	6	0	42.4	41.6	42.4
Q2FVC1	Q2FVC1	Phosphoglucomutase	>sp|Q2FVC1|PGCA_STAA8 Phosphoglucomutase OS=Staphylococcus aureus (strain NCTC 8325) GN=pgcA PE=1 SV=2	-0.178709	1.80129	-0.185195	-0.214441	-0.13649		25	25	25	50.7	50.7	50.7	0	245.93	25	25	25	20	22	18	20	22	18	20	22	18	0.9882	0.87748	32.321	32	0	1.3208	20.066	11	0	0.88808	34.391	12	0	0.88212	43.737	9	0	40.6	44.9	42.9
Q2FVC2	Q2FVC2	Pyrophosphohydrolase, putative	>tr|Q2FVC2|Q2FVC2_STAA8 Pyrophosphohydrolase, putative OS=Staphylococcus aureus (strain NCTC 8325) GN=SAOUHSC_02791 PE=4 SV=1	0.0523981	0.240466	0.201634	-0.0664878	0.0220482		7	7	7	63.8	63.8	63.8	0	76.453	7	7	7	6	6	6	6	6	6	6	6	6	1.0143	0.95496	19.74	13	0	1.7347	24.646	5	3	0.98055	8.1109	5	0	0.97074	27.475	6	0	60	53.1	53.1
Q2FVC3	Q2FVC3	Putative uncharacterized protein	>tr|Q2FVC3|Q2FVC3_STAA8 Putative uncharacterized protein OS=Staphylococcus aureus (strain NCTC 8325) GN=SAOUHSC_02790 PE=4 SV=1	-0.0573347	0.105263	0.225275	0.00532815	-0.402607		10	10	10	11.8	11.8	11.8	0	21.649	10	10	10	7	8	8	7	8	8	7	8	8	1.4671	1.169	21.801	6	0	1.549	24.592	4	0	1.0082	57.029	6	5	0.72802	59.509	7	6	9.2	9.2	10.1
Q2FVD5	Q2FVD5	Uncharacterized oxidoreductase SAOUHSC_02778	>sp|Q2FVD5|Y2778_STAA8 Uncharacterized oxidoreductase SAOUHSC_02778 OS=Staphylococcus aureus (strain NCTC 8325) GN=SAOUHSC_02778 PE=3 SV=1	0.224377	0.269217	0.822363	-0.17511	0.0258793		6	6	6	41.6	41.6	41.6	0	54.551	6	6	6	5	3	6	5	3	6	5	3	6	0.99065	1.0242	35.515	9	0	2.6052	18.699	3	0	0.92086	53.597	5	4	0.95198	22.89	5	0	31.6	18.6	41.6
Q2FVE1	Q2FVE1	Transporter, putative	>tr|Q2FVE1|Q2FVE1_STAA8 Transporter, putative OS=Staphylococcus aureus (strain NCTC 8325) GN=SAOUHSC_02773 PE=4 SV=1	0.822111	0.180843	-0.565076	2.2093	NaN		2	2	2	4.7	4.7	4.7	0	14.583	2	2	2	1	2	1	1	2	1	1	2	1	2.8088	1.9307	202.73	5	5	0.98404	148.43	2	2	4.6301	171.99	2	2	NaN	NaN	1	1	3.3	4.7	1.4
Q2FVF5	Q2FVF5	Putative uncharacterized protein	>tr|Q2FVF5|Q2FVF5_STAA8 Putative uncharacterized protein OS=Staphylococcus aureus (strain NCTC 8325) GN=SAOUHSC_02759 PE=4 SV=1	0.172618	0.16135	0.859015	0.0865121	-0.427673		4	4	4	31.8	31.8	31.8	0	46.421	4	4	4	4	3	4	4	3	4	4	3	4	1.476	1.4724	36.154	5	0	2.6233	150.57	5	3	1.0296	142.45	5	4	0.69821	166.37	5	3	31.8	18.5	31.8
Q2FVF9	Q2FVF9	Putative uncharacterized protein	>tr|Q2FVF9|Q2FVF9_STAA8 Putative uncharacterized protein OS=Staphylococcus aureus (strain NCTC 8325) GN=SAOUHSC_02755 PE=4 SV=1	-0.0817473	0.0963802	0.484293	-0.417097	-0.312438		8	8	8	32.1	32.1	32.1	0	101.88	8	8	8	5	6	8	5	6	8	5	6	8	1.0388	1.0579	55.002	17	0	2.0622	27.944	4	0	0.79577	60.939	6	0	0.79661	45.847	7	0	26.5	28.5	32.1
Q2FVG3	Q2FVG3	Carboxylic ester hydrolase	>tr|Q2FVG3|Q2FVG3_STAA8 Carboxylic ester hydrolase OS=Staphylococcus aureus (strain NCTC 8325) GN=SAOUHSC_02751 PE=3 SV=1	0.2865	1.20613	0.168257	0.425567	0.265677		4	4	4	12	12	12	0	39.487	4	4	4	3	2	3	3	2	3	3	2	3	1.3987	1.2099	23.645	7	0	1.6408	35.546	3	0	1.4513	14.765	2	0	1.1724	22.004	2	0	9.3	6.9	9.6
Q2FVG5	Q2FVG5	Putative uncharacterized protein	>tr|Q2FVG5|Q2FVG5_STAA8 Putative uncharacterized protein OS=Staphylococcus aureus (strain NCTC 8325) GN=SAOUHSC_02747 PE=4 SV=1	0.376155	0.472458	0.156138	NaN	0.596172		5	5	5	29.6	29.6	29.6	0	11.979	5	5	5	3	4	4	3	4	4	3	4	4	1.3037	1.127	15.985	4	0	1.5354	20.045	3	2	NaN	NaN	1	0	1.4644	25.189	3	1	18.1	20.6	22.6
Q2FVH3	Q2FVH3	2-dehydropantoate 2-reductase	>tr|Q2FVH3|Q2FVH3_STAA8 2-dehydropantoate 2-reductase OS=Staphylococcus aureus (strain NCTC 8325) GN=SAOUHSC_02739 PE=3 SV=1	-0.105189	0.0342748	0.773068	-0.983447	NaN		6	6	6	28.6	28.6	28.6	0	38.566	6	6	6	4	4	3	4	4	3	4	4	3	0.88101	0.93257	38.846	3	0	2.333	26.511	3	2	0.52104	69.755	2	1	NaN	NaN	1	0	18.6	18	13.2
Q2FVI0	Q2FVI0	Putative uncharacterized protein	>tr|Q2FVI0|Q2FVI0_STAA8 Putative uncharacterized protein OS=Staphylococcus aureus (strain NCTC 8325) GN=SAOUHSC_02731 PE=4 SV=1	-0.38823	0.356087	-0.0665784	-0.709882	NaN		5	5	5	6.6	6.6	6.6	0	11.068	5	5	5	5	2	3	5	2	3	5	2	3	1.2986	0.9549	22.379	4	0	1.2986	22.379	4	0	0.62724	64.019	3	3	NaN	NaN	1	1	6.6	2.6	3.9
Q2FVK1	Q2FVK1	Gamma-hemolysin component B	>sp|Q2FVK1|HLGB_STAA8 Gamma-hemolysin component B OS=Staphylococcus aureus (strain NCTC 8325) GN=hlgB PE=1 SV=1	0.446488	0.200644	-0.220026	2.02567	-0.466178		5	5	5	23.4	23.4	23.4	0	5.8606	5	5	5	2	2	4	2	2	4	2	2	4	1.1516	0.84356	96.218	7	5	1.2305	2.4912	2	1	4.0449	35.317	2	2	0.67906	36.743	3	2	8.6	9.8	20
Q2FVK8	Q2FVK8	2,3-bisphosphoglycerate-dependent phosphoglycerate mutase	>sp|Q2FVK8|GPMA_STAA8 2,3-bisphosphoglycerate-dependent phosphoglycerate mutase OS=Staphylococcus aureus (strain NCTC 8325) GN=gpmA PE=3 SV=1	-0.121218	0.408817	-0.234907	0.101516	-0.230262		19	19	19	82.5	82.5	82.5	0	323.31	19	19	19	16	14	19	16	14	19	16	14	19	1.0838	0.91982	40.319	57	0	1.2741	33.174	18	0	1.1114	28.898	18	0	0.82336	52.771	21	0	76.3	63.6	82.5
Q2FVM1	Q2FVM1	Nitrate reductase, alpha subunit	>tr|Q2FVM1|Q2FVM1_STAA8 Nitrate reductase, alpha subunit OS=Staphylococcus aureus (strain NCTC 8325) GN=SAOUHSC_02681 PE=4 SV=1	0.081559	0.567706	0.0204844	0.189413	0.0347792		22	22	22	24.4	24.4	24.4	0	73.61	22	22	22	17	16	16	17	16	16	17	16	16	1.1584	1.0261	42.815	25	0	1.3659	20.635	9	0	1.1584	46.533	9	0	1.0111	56.96	7	0	20.5	17.7	18.6
Q2FVN3	Q2FVN3	HTH-type transcriptional regulator SarZ	>sp|Q2FVN3|SARZ_STAA8 HTH-type transcriptional regulator SarZ OS=Staphylococcus aureus (strain NCTC 8325) GN=sarZ PE=1 SV=1	0.416536	0.633838	0.257373	NaN	0.5757		3	3	3	21.6	21.6	21.6	0	5.2681	3	3	3	2	0	2	2	0	2	2	0	2	1.6928	1.1953	65.058	4	2	1.6928	7.9795	2	1	NaN	NaN	0	0	1.4927	110.21	2	1	16.2	0	14.2
Q2FVN6	Q2FVN6	Putative uncharacterized protein	>tr|Q2FVN6|Q2FVN6_STAA8 Putative uncharacterized protein OS=Staphylococcus aureus (strain NCTC 8325) GN=SAOUHSC_02666 PE=4 SV=1	-0.0419884	0.0349427	0.712023	-0.534997	-0.302991		5	5	5	38.1	38.1	38.1	0	7.7076	5	5	5	4	4	3	4	4	3	4	4	3	0.82798	0.81057	36.646	9	0	2.4286	27.552	3	0	0.70816	9.2322	3	0	0.77463	5.0112	3	0	38.1	28.8	28.8
Q2FVN7	Q2FVN7	Putative uncharacterized protein	>tr|Q2FVN7|Q2FVN7_STAA8 Putative uncharacterized protein OS=Staphylococcus aureus (strain NCTC 8325) GN=SAOUHSC_02665 PE=4 SV=1	-0.0103869	0.0226057	-0.220648	0.266757	-0.0772693		6	6	6	59.3	59.3	59.3	0	47.747	6	6	6	5	6	4	5	6	4	5	6	4	1.2769	1.1351	25.282	7	0	1.2769	36.395	5	4	1.3033	16.404	3	0	0.87647	28.415	3	0	54.3	59.3	37.1
Q2FVP8	Q2FVP8	Ferredoxin--NADP reductase	>sp|Q2FVP8|FENR_STAA8 Ferredoxin--NADP reductase OS=Staphylococcus aureus (strain NCTC 8325) GN=SAOUHSC_02654 PE=3 SV=1	0.227741	1.01253	0.369383	0.207893	0.105946		6	6	6	21.8	21.8	21.8	0	30.498	6	6	6	4	6	6	4	6	6	4	6	6	1.0396	0.99601	24.357	7	0	1.7831	44.577	5	4	1.1727	39.524	6	4	1.0216	23.94	4	0	14.2	21.8	21.8
Q2FVQ0	Q2FVQ0	Putative uncharacterized protein	>tr|Q2FVQ0|Q2FVQ0_STAA8 Putative uncharacterized protein OS=Staphylococcus aureus (strain NCTC 8325) GN=SAOUHSC_02652 PE=4 SV=1	0.0717114	0.194713	0.0563061	0.305679	-0.146851		6	6	6	26	26	26	0	83.256	6	6	6	6	5	5	6	5	5	6	5	5	0.97493	0.93857	13.957	7	0	1.5353	23.505	3	0	1.2484	31.705	4	2	0.8279	45.473	4	2	26	18	18
Q2FVQ3	Q2FVQ3	Putative uncharacterized protein	>tr|Q2FVQ3|Q2FVQ3_STAA8 Putative uncharacterized protein OS=Staphylococcus aureus (strain NCTC 8325) GN=SAOUHSC_02649 PE=4 SV=1	-0.801836	1.09743	NaN	-0.90301	-0.700662		4	4	4	9.3	9.3	9.3	0	4.4271	4	4	4	2	2	3	2	2	3	2	2	3	0.57663	0.60024	42.932	6	6	NaN	NaN	1	1	0.55307	90.42	2	2	0.58149	3.2985	3	3	2.5	5.6	8.1
Q2FVQ5	Q2FVQ5	Probable malate:quinone oxidoreductase	>tr|Q2FVQ5|Q2FVQ5_STAA8 Probable malate:quinone oxidoreductase OS=Staphylococcus aureus (strain NCTC 8325) GN=mqo PE=3 SV=1	-0.00881043	0.0345849	-0.157271	0.122209	0.00863037		29	29	29	63.4	63.4	63.4	0	209.53	29	29	29	21	22	26	21	22	26	21	22	26	1.229	0.98839	44.756	48	0	1.269	15.717	15	0	1.1423	25.126	15	0	0.98798	67.846	18	0	48.4	58.5	57.3
Q2FVR9	Q2FVR9	Isopentenyl-diphosphate delta-isomerase	>sp|Q2FVR9|IDI2_STAA8 Isopentenyl-diphosphate delta-isomerase OS=Staphylococcus aureus (strain NCTC 8325) GN=fni PE=3 SV=1	-0.183179	0.050225	0.874128	-1.24049	NaN		3	3	3	11.2	11.2	11.2	0	2.9541	3	3	3	2	2	1	2	2	1	2	2	1	0.93223	0.78996	91.28	4	4	2.4284	54.37	2	2	0.43213	23.597	2	2	NaN	NaN	0	0	7.7	8.9	5.4
Q2FVS2	Q2FVS2	Putative uncharacterized protein	>tr|Q2FVS2|Q2FVS2_STAA8 Putative uncharacterized protein OS=Staphylococcus aureus (strain NCTC 8325) GN=SAOUHSC_02620 PE=4 SV=1	-0.117823	0.678263	0.010923	-0.191722	-0.172669		3	3	3	15.8	15.8	15.8	0	7.5243	3	3	3	2	2	3	2	2	3	2	2	3	0.92458	0.9606	10.989	6	0	1.4096	2.6193	2	0	0.85957	8.9725	2	0	0.83699	16.606	2	0	10.7	10.7	15.8
Q2FVS7	Q2FVS7	Aldose 1-epimerase, putative	>tr|Q2FVS7|Q2FVS7_STAA8 Aldose 1-epimerase, putative OS=Staphylococcus aureus (strain NCTC 8325) GN=SAOUHSC_02614 PE=4 SV=1	-0.121652	0.579656	-0.213554	0.0354831	-0.186886		3	3	3	10	10	10	0	6.5131	3	3	3	3	2	3	3	2	3	3	2	3	0.92469	0.92878	15.491	7	0	1.1745	52.744	4	2	0.99925	13.923	2	0	0.81587	10.959	3	0	10	7.4	10
Q2FVT0	Q2FVT0	Ribose-5-phosphate isomerase A	>tr|Q2FVT0|Q2FVT0_STAA8 Ribose-5-phosphate isomerase A OS=Staphylococcus aureus (strain NCTC 8325) GN=rpiA PE=3 SV=1	0.481989	0.805273	0.272501	0.916094	0.257373		8	8	8	30.7	30.7	30.7	0	21.43	8	8	8	7	7	6	7	7	6	7	7	6	1.1216	1.0837	48.465	8	0	1.6534	89.428	8	6	1.823	43.336	3	0	1.1647	34.883	3	0	23.2	30.7	30.7
Q2FVT1	Q2FVT1	Lysostaphin resistance protein A	>sp|Q2FVT1|LYRA_STAA8 Lysostaphin resistance protein A OS=Staphylococcus aureus (strain NCTC 8325) GN=lyrA PE=1 SV=1	-0.0992936	0.205606	0.0482362	NaN	-0.246823		5	5	5	20.8	20.8	20.8	0	54.262	5	5	5	3	2	3	3	2	3	3	2	3	0.7942	0.69889	24.45	5	0	1.4994	20.928	3	1	NaN	NaN	1	0	0.7942	57.196	3	1	14.1	9.8	7.6
Q2FVT2	Q2FVT2	Formimidoylglutamase	>sp|Q2FVT2|HUTG_STAA8 Formimidoylglutamase OS=Staphylococcus aureus (strain NCTC 8325) GN=hutG PE=3 SV=1	0.191345	0.554705	0.346645	0.294194	-0.0668051		11	11	11	34.7	34.7	34.7	0	87.224	11	11	11	9	5	8	9	5	8	9	5	8	1.4017	1.2262	46.583	11	0	1.8399	32.654	4	0	1.2536	40.67	3	0	0.92879	63.6	4	0	28.6	22.2	34.7
Q2FVT5	Q2FVT5	Urocanate hydratase	>tr|Q2FVT5|Q2FVT5_STAA8 Urocanate hydratase OS=Staphylococcus aureus (strain NCTC 8325) GN=hutU PE=3 SV=1	-0.108778	0.360997	-0.318506	0.066537	-0.0743651		34	34	34	61.1	61.1	61.1	0	246.85	34	34	34	30	25	29	30	25	29	30	25	29	1.0631	0.94257	35.045	68	0	1.2097	20.056	22	0	1.1041	27.772	21	0	0.91289	47.031	25	0	55.9	45.4	57.1
Q2FVT6	Q2FVT6	Imidazolonepropionase	>sp|Q2FVT6|HUTI_STAA8 Imidazolonepropionase OS=Staphylococcus aureus (strain NCTC 8325) GN=hutI PE=3 SV=1	0.0548911	0.638532	0.0149266	0.118493	0.0312541		14	14	14	55.1	55.1	55.1	0	258.14	14	14	14	12	11	12	12	11	12	12	11	12	1.1482	1.0714	22.753	34	0	1.5076	22.8	12	0	1.1396	11.864	10	0	0.98223	30.199	12	0	46.4	46.1	46.4
Q2FVT7	Q2FVT7	Putative uncharacterized protein	>tr|Q2FVT7|Q2FVT7_STAA8 Putative uncharacterized protein OS=Staphylococcus aureus (strain NCTC 8325) GN=SAOUHSC_02605 PE=4 SV=1	-0.114663	0.555357	-0.253532	0.0154976	-0.105954		2	2	2	5.1	5.1	5.1	0	2.5643	2	2	2	2	2	2	2	2	2	2	2	2	1.0626	0.95714	9.0884	4	0	1.1359	56.945	3	2	1.0626	3.5213	2	0	0.8635	56.652	3	2	5.1	5.1	5.1
Q2FVT8	Q2FVT8	Putative uncharacterized protein	>tr|Q2FVT8|Q2FVT8_STAA8 Putative uncharacterized protein OS=Staphylococcus aureus (strain NCTC 8325) GN=SAOUHSC_02604 PE=4 SV=1	-0.0217947	0.0690304	-0.227912	0.10165	0.0608775		6	6	6	31.1	31.1	31.1	0	25.142	6	6	6	5	5	6	5	5	6	5	5	6	1.1679	1.091	19.383	6	0	1.2461	20.991	3	1	1.1389	33.866	5	3	0.98828	41.996	6	4	28.3	19.8	31.1
Q2FVU2	Q2FVU2	Putative uncharacterized protein	>tr|Q2FVU2|Q2FVU2_STAA8 Putative uncharacterized protein OS=Staphylococcus aureus (strain NCTC 8325) GN=SAOUHSC_02600 PE=4 SV=1	-0.382689	0.269045	0.536749	-1.26247	-0.422346		5	5	5	29.8	29.8	29.8	0	11.74	5	5	5	4	3	2	4	3	2	4	3	2	0.81152	0.71	101.03	10	8	2.1327	128.3	5	4	0.42626	14.525	3	3	0.70306	107.12	2	1	20.2	24.4	9.5
Q2FVU4	Q2FVU4	PTS system component, putative	>tr|Q2FVU4|Q2FVU4_STAA8 PTS system component, putative OS=Staphylococcus aureus (strain NCTC 8325) GN=SAOUHSC_02597 PE=4 SV=1	0.0379148	0.623853	0.0651587	-0.00730407	0.0558898		4	4	4	8.1	8.1	8.1	0	55.511	4	4	4	4	4	4	4	4	4	4	4	4	1.0481	1.0219	16.869	10	0	1.5191	15.265	3	0	1.0426	11.561	3	0	0.97161	24.629	4	0	8.1	8.1	8.1
Q2FVU7	Q2FVU7	Putative uncharacterized protein	>tr|Q2FVU7|Q2FVU7_STAA8 Putative uncharacterized protein OS=Staphylococcus aureus (strain NCTC 8325) GN=SAOUHSC_02594 PE=4 SV=1	-0.447321	1.02528	-0.370284	-0.23817	-0.733507		6	6	6	35.5	35.5	35.5	0	55.49	6	6	6	4	4	5	4	4	5	4	4	5	0.86199	0.8301	66.164	4	0	1.0801	30.107	3	2	0.85163	48.021	6	5	0.56798	65.046	6	4	24.2	19	26.5
Q2FVV6	Q2FVV6	Putative uncharacterized protein	>tr|Q2FVV6|Q2FVV6_STAA8 Putative uncharacterized protein OS=Staphylococcus aureus (strain NCTC 8325) GN=SAOUHSC_02585 PE=4 SV=1	0.484923	1.45842	0.591584	0.299831	0.563353		7	7	7	35.7	35.7	35.7	0	34.118	7	7	7	4	5	5	4	5	5	4	5	5	1.4138	1.2599	21.403	6	0	2.1233	43.045	2	1	1.2256	18.479	5	3	1.3731	26.531	3	0	20.4	29.1	25.2
Q2FVV9	Q2FVV9	Putative formate dehydrogenase SAOUHSC_02582	>sp|Q2FVV9|FDHL_STAA8 Putative formate dehydrogenase SAOUHSC_02582 OS=Staphylococcus aureus (strain NCTC 8325) GN=SAOUHSC_02582 PE=3 SV=1	-0.141666	0.336983	-0.212835	0.157432	-0.369595		33	33	33	42.6	42.6	42.6	0	255.88	33	33	33	28	25	30	28	25	30	28	25	30	1.11	0.87294	32.567	60	0	1.2172	22.98	19	0	1.1382	34.932	20	0	0.74212	34.747	21	0	35.3	35	40
Q2FVW3	Q2FVW3	Putative uncharacterized protein	>tr|Q2FVW3|Q2FVW3_STAA8 Putative uncharacterized protein OS=Staphylococcus aureus (strain NCTC 8325) GN=SAOUHSC_02579 PE=4 SV=1	-0.0648083	0.281625	-0.129671	0.102591	-0.167345		6	6	6	16.8	16.8	16.8	0	22.844	6	6	6	5	4	5	5	4	5	5	4	5	1.0781	0.93338	24.957	11	0	1.2955	12.072	4	0	1.0781	10.693	3	0	0.86476	38.301	4	0	14.4	10.4	14.2
Q2FVW4	Q2FVW4	Putative 2-hydroxyacid dehydrogenase SAOUHSC_02577	>sp|Q2FVW4|Y2577_STAA8 Putative 2-hydroxyacid dehydrogenase SAOUHSC_02577 OS=Staphylococcus aureus (strain NCTC 8325) GN=SAOUHSC_02577 PE=3 SV=1	-0.337344	0.312809	0.412511	-0.947361	-0.477181		19	19	19	76.3	76.3	76.3	0	323.31	19	19	19	18	19	19	18	19	19	18	19	19	0.74128	0.72249	57.676	50	0	2.0646	29.323	14	0	0.55597	33.702	17	0	0.69236	52.423	19	0	76.3	76.3	76.3
Q2FVW7	Q2FVW7	Putative uncharacterized protein	>tr|Q2FVW7|Q2FVW7_STAA8 Putative uncharacterized protein OS=Staphylococcus aureus (strain NCTC 8325) GN=SAOUHSC_02556 PE=4 SV=1	0.0854538	0.117307	0.24245	0.41446	-0.400549		3	3	3	10.1	10.1	10.1	0	4.269	3	3	3	2	3	3	2	3	3	2	3	3	1.2812	1.148	33.895	6	0	1.531	23.002	2	0	1.3741	3.0683	2	0	0.71869	40.729	2	0	7.6	10.1	10.1
Q2FVW9	Q2FVW9	Putative uncharacterized protein	>tr|Q2FVW9|Q2FVW9_STAA8 Putative uncharacterized protein OS=Staphylococcus aureus (strain NCTC 8325) GN=SAOUHSC_02554 PE=1 SV=1	0.106878	0.0624473	0.607389	NaN	-0.393634		7	7	7	29.8	29.8	29.8	0	37.193	7	7	7	6	4	4	6	4	4	6	4	4	1.0254	1.0197	20.178	3	0	2.0759	61.539	6	5	NaN	NaN	1	0	0.71927	13.963	4	3	29.5	17.2	21.5
Q2FVX0	Q2FVX0	Putative uncharacterized protein	>tr|Q2FVX0|Q2FVX0_STAA8 Putative uncharacterized protein OS=Staphylococcus aureus (strain NCTC 8325) GN=SAOUHSC_02553 PE=4 SV=1	0.281267	0.498091	-0.0340274	0.190678	0.68715		7	7	7	27.2	27.2	27.2	0	28.251	7	7	7	5	6	6	5	6	6	5	6	6	1.1682	1.1413	25.489	7	0	1.3355	18.967	4	2	1.1469	26.539	3	0	1.5701	33.44	5	3	20.4	27.2	27.2
Q2FVX4	Q2FVX4	Molybdenum ABC transporter, periplasmic molybdate-binding protein	>tr|Q2FVX4|Q2FVX4_STAA8 Molybdenum ABC transporter, periplasmic molybdate-binding protein OS=Staphylococcus aureus (strain NCTC 8325) GN=SAOUHSC_02549 PE=4 SV=1	-0.000854294	0.000989199	0.528171	-0.305253	-0.225481		10	10	10	36.5	36.5	36.5	0	17.856	10	10	10	10	5	7	10	5	7	10	5	7	0.85073	0.83659	30.435	6	0	2.0263	87.784	12	10	0.85073	50.3	6	4	0.8102	63.886	7	5	36.5	20.4	30.4
Q2FVX8	Q2FVX8	Molybdenum cofactor biosynthesis protein B	>tr|Q2FVX8|Q2FVX8_STAA8 Molybdenum cofactor biosynthesis protein B OS=Staphylococcus aureus (strain NCTC 8325) GN=SAOUHSC_02544 PE=3 SV=1	0.0957142	0.811737	0.087327	0.0263043	0.173511		8	8	8	67.9	67.9	67.9	0	34.887	8	8	8	7	5	8	7	5	8	7	5	8	1.1645	1.0683	15.855	12	0	1.5108	9.9809	4	0	1.029	12.802	4	0	1.0661	25.653	4	0	58.9	39.3	67.9
Q2FVX9	Q2FVX9	Cyclic pyranopterin monophosphate synthase accessory protein	>sp|Q2FVX9|MOAC_STAA8 Cyclic pyranopterin monophosphate synthase accessory protein OS=Staphylococcus aureus (strain NCTC 8325) GN=moaC PE=3 SV=1	0.228088	0.558376	0.53456	0.0507454	0.0989585		4	4	4	31.7	31.7	31.7	0	25.752	4	4	4	4	3	3	4	3	3	4	3	3	1.0767	1.071	22.037	9	0	1.9777	38.086	3	0	1.0704	2.6997	3	0	1.0013	17.556	3	0	31.7	24.4	22
Q2FVY0	Q2FVY0	Molybdopterin biosynthesis protein moeA, putative	>tr|Q2FVY0|Q2FVY0_STAA8 Molybdopterin biosynthesis protein moeA, putative OS=Staphylococcus aureus (strain NCTC 8325) GN=SAOUHSC_02542 PE=4 SV=1	-0.104518	1.2121	-0.051145	-0.139919	-0.122491		20	20	20	68	68	68	0	216	20	20	20	16	18	18	16	18	18	16	18	18	0.95742	0.94366	34.702	42	0	1.3632	45.453	14	0	0.96297	31.039	13	0	0.91578	27.65	15	0	52.5	58	61.8
Q2FVZ2	Q2FVZ2	Putative uncharacterized protein	>tr|Q2FVZ2|Q2FVZ2_STAA8 Putative uncharacterized protein OS=Staphylococcus aureus (strain NCTC 8325) GN=SAOUHSC_02529 PE=4 SV=1	0.445364	0.874767	0.740453	0.480472	0.115166		4	4	4	20.5	20.5	20.5	0	7.1439	4	4	4	3	3	4	3	3	4	3	3	4	1.5461	1.3745	48.446	7	5	2.2563	27.599	2	2	1.3697	16.961	2	1	1.0603	68.722	3	2	13	13	20.5
Q2FVZ4	Q2FVZ4	Lipid II:glycine glycyltransferase	>sp|Q2FVZ4|FEMX_STAA8 Lipid II:glycine glycyltransferase OS=Staphylococcus aureus (strain NCTC 8325) GN=femX PE=1 SV=1	0.0958299	0.855126	0.0160683	0.143524	0.127897		9	9	9	29.5	29.5	29.5	0	17.711	9	9	9	6	8	7	6	8	7	6	8	7	1.158	1.0825	30.601	16	0	1.4634	26.785	4	0	1.1122	24.155	6	0	1.1123	38.196	6	0	19	26.6	21.1
Q2FVZ5	Q2FVZ5	Putative uncharacterized protein	>tr|Q2FVZ5|Q2FVZ5_STAA8 Putative uncharacterized protein OS=Staphylococcus aureus (strain NCTC 8325) GN=SAOUHSC_02525 PE=4 SV=1	-0.0529303	0.0837125	0.152378	-0.47325	0.162081		10	10	10	11	11	11	0	88.302	10	10	10	8	5	2	8	5	2	8	5	2	1.1951	1.1423	11.217	4	0	1.4729	21.015	6	4	0.72388	64.176	2	1	1.0625	3.9572	2	1	8.4	5.6	2.5
Q2FW06	Q2FW06	50S ribosomal protein L3	>sp|Q2FW06|RL3_STAA8 50S ribosomal protein L3 OS=Staphylococcus aureus (strain NCTC 8325) GN=rplC PE=3 SV=1	-0.39729	2.3865	-0.384245	-0.361046	-0.44658		13	13	13	52.7	52.7	52.7	0	159.46	13	13	13	8	11	11	8	11	11	8	11	11	0.77155	0.77157	37.885	32	0	1.0596	30.582	8	0	0.7819	24.915	12	0	0.70087	53.141	12	0	40.9	52.3	52.3
Q2FW07	Q2FW07	50S ribosomal protein L4	>sp|Q2FW07|RL4_STAA8 50S ribosomal protein L4 OS=Staphylococcus aureus (strain NCTC 8325) GN=rplD PE=3 SV=1	0.453012	0.736491	0.876802	0.102725	0.37951		9	9	9	41.1	41.1	41.1	0	101.41	9	9	9	8	9	9	8	9	9	8	9	9	1.2839	1.2728	38.606	26	0	2.5393	42.657	8	0	1.1059	22.92	9	0	1.2607	26.015	9	0	35.7	41.1	41.1
Q2FW08	Q2FW08	50S ribosomal protein L23	>sp|Q2FW08|RL23_STAA8 50S ribosomal protein L23 OS=Staphylococcus aureus (strain NCTC 8325) GN=rplW PE=3 SV=1	-0.219733	0.189737	0.535356	-0.876625	-0.31793		4	4	4	51.6	51.6	51.6	0	43.66	4	4	4	4	4	4	4	4	4	4	4	4	0.89919	0.90951	49.575	12	0	2.1337	12.221	4	0	0.55497	29.637	4	0	0.75906	36.87	4	0	51.6	51.6	51.6
Q2FW10	Q2FW10	30S ribosomal protein S19	>sp|Q2FW10|RS19_STAA8 30S ribosomal protein S19 OS=Staphylococcus aureus (strain NCTC 8325) GN=rpsS PE=3 SV=1	0.168658	0.149173	0.91265	0.0136409	-0.420318		9	9	9	68.5	68.5	68.5	0	67.021	9	9	9	6	7	7	6	7	7	6	7	7	1.1893	1.0802	56.109	15	0	2.7591	46.592	5	0	1.016	18.628	4	0	0.71893	62.959	6	0	63	56.5	62
Q2FW11	Q2FW11	50S ribosomal protein L22	>sp|Q2FW11|RL22_STAA8 50S ribosomal protein L22 OS=Staphylococcus aureus (strain NCTC 8325) GN=rplV PE=3 SV=1	-0.0465669	0.0463186	0.566182	-0.534579	-0.171303		10	10	10	64.1	64.1	64.1	0	119.82	10	10	10	7	7	9	7	7	9	7	7	9	0.89668	0.88804	56.121	17	0	2.0728	23.846	6	0	0.70233	42.188	6	0	0.84865	51.638	5	0	59	59.8	63.2
Q2FW12	Q2FW12	30S ribosomal protein S3	>sp|Q2FW12|RS3_STAA8 30S ribosomal protein S3 OS=Staphylococcus aureus (strain NCTC 8325) GN=rpsC PE=3 SV=1	0.0466261	0.125063	0.253384	-0.186229	0.0727232		14	14	14	56.2	56.2	56.2	0	91.483	14	14	14	10	13	11	10	13	11	10	13	11	1.1851	1.0415	49.538	31	0	1.7853	26.076	10	0	0.90282	46.419	12	0	0.98725	64.055	9	0	48.4	52.1	52.5
Q2FW13	Q2FW13	50S ribosomal protein L16	>sp|Q2FW13|RL16_STAA8 50S ribosomal protein L16 OS=Staphylococcus aureus (strain NCTC 8325) GN=rplP PE=3 SV=1	-0.0900495	0.0685837	0.766044	-0.608364	-0.427828		6	6	6	44.4	44.4	44.4	0	103.88	6	6	6	6	6	5	6	6	5	6	6	5	0.74481	0.75758	58.189	16	0	2.5216	21.623	5	0	0.67511	27.376	6	0	0.7125	46.575	5	0	44.4	44.4	41.7
Q2FW14	Q2FW14	50S ribosomal protein L29	>sp|Q2FW14|RL29_STAA8 50S ribosomal protein L29 OS=Staphylococcus aureus (strain NCTC 8325) GN=rpmC PE=3 SV=1	-0.226305	0.189269	0.597412	-0.465261	-0.811067		5	5	5	55.1	55.1	55.1	0	42.588	5	5	5	4	4	5	4	4	5	4	4	5	0.81894	0.80044	63.404	18	0	2.3533	38.745	6	0	0.7277	16.129	6	0	0.54197	64.34	6	0	55.1	55.1	55.1
Q2FW15	Q2FW15	30S ribosomal protein S17	>sp|Q2FW15|RS17_STAA8 30S ribosomal protein S17 OS=Staphylococcus aureus (strain NCTC 8325) GN=rpsQ PE=3 SV=1	-0.0575479	0.0580506	0.566572	-0.511794	-0.227422		4	4	4	37.9	37.9	37.9	0	21.653	4	4	4	4	4	4	4	4	4	4	4	4	0.8737	0.87051	55.042	15	0	2.1847	51.426	5	0	0.72919	13.348	5	0	0.82071	33.195	5	0	37.9	37.9	37.9
Q2FW16	Q2FW16	50S ribosomal protein L14	>sp|Q2FW16|RL14_STAA8 50S ribosomal protein L14 OS=Staphylococcus aureus (strain NCTC 8325) GN=rplN PE=3 SV=1	0.255644	0.619741	0.00100953	0.231064	0.534858		9	9	9	75.4	75.4	75.4	0	23.208	9	9	9	6	8	9	6	8	9	6	8	9	1.357	1.1979	25.585	17	0	1.5194	32.67	5	0	1.2225	21.033	6	0	1.3718	15.822	6	0	50	65.6	75.4
Q2FW17	Q2FW17	50S ribosomal protein L24	>sp|Q2FW17|RL24_STAA8 50S ribosomal protein L24 OS=Staphylococcus aureus (strain NCTC 8325) GN=rplX PE=3 SV=1	0.322905	0.311893	0.924936	-0.387468	0.431249		5	5	5	29.5	29.5	29.5	0	6.8347	5	5	5	2	1	5	2	1	5	2	1	5	1.4163	1.3484	76.648	9	7	2.744	53.81	2	2	0.78787	80.997	2	2	1.3071	85.536	5	3	19	11.4	29.5
Q2FW18	Q2FW18	50S ribosomal protein L5	>sp|Q2FW18|RL5_STAA8 50S ribosomal protein L5 OS=Staphylococcus aureus (strain NCTC 8325) GN=rplE PE=3 SV=1	-0.188476	0.168529	0.562181	-0.761849	-0.36576		16	16	16	62.6	62.6	62.6	0	83.123	16	16	16	13	13	15	13	13	15	13	13	15	0.83019	0.7586	50.781	32	0	1.9801	37.851	9	0	0.60247	27.705	10	0	0.73845	42.202	13	0	58.7	62.6	62.6
Q2FW19	Q2FW19	30S ribosomal protein S14 type Z	>sp|Q2FW19|RS14Z_STAA8 30S ribosomal protein S14 type Z OS=Staphylococcus aureus (strain NCTC 8325) GN=rpsZ PE=3 SV=2	0.00297072	0.00312017	0.589668	-0.278636	-0.302119		3	3	3	26.2	26.2	26.2	0	3.4721	3	3	3	3	3	3	3	3	3	3	3	3	1.1009	0.87686	49.145	5	0	1.9443	76.389	2	0	0.83504	41.277	2	1	0.77035	2.1336	2	0	26.2	26.2	26.2
Q2FW20	Q2FW20	30S ribosomal protein S8	>sp|Q2FW20|RS8_STAA8 30S ribosomal protein S8 OS=Staphylococcus aureus (strain NCTC 8325) GN=rpsH PE=3 SV=1	0.161113	0.182113	0.728574	-0.349438	0.104202		11	11	11	77.3	77.3	77.3	0	122.75	11	11	11	7	9	11	7	9	11	7	9	11	1.1498	1.2103	47.513	16	0	2.4658	49.102	5	0	0.84751	36.146	4	0	0.99548	23.434	7	0	62.1	76.5	77.3
Q2FW21	Q2FW21	50S ribosomal protein L6	>sp|Q2FW21|RL6_STAA8 50S ribosomal protein L6 OS=Staphylococcus aureus (strain NCTC 8325) GN=rplF PE=3 SV=1	-0.0555705	0.0464878	0.664574	-0.65213	-0.179155		10	10	10	74.7	74.7	74.7	0	59.527	10	10	10	6	6	10	6	6	10	6	6	10	0.94618	0.97302	44.719	16	0	2.3326	25.972	6	0	0.62991	9.128	5	0	0.85074	25.857	5	0	42.7	46.1	74.7
Q2FW22	Q2FW22	50S ribosomal protein L18	>sp|Q2FW22|RL18_STAA8 50S ribosomal protein L18 OS=Staphylococcus aureus (strain NCTC 8325) GN=rplR PE=3 SV=1	0.314001	0.320588	0.700351	-0.411042	0.652693		11	11	11	68.9	68.9	68.9	0	81.149	11	11	11	9	10	10	9	10	10	9	10	10	1.1341	1.128	63.331	20	0	2.1653	47.17	3	0	0.7363	42.11	9	0	1.4902	60.727	8	0	68.9	68.9	68.9
Q2FW23	Q2FW23	30S ribosomal protein S5	>sp|Q2FW23|RS5_STAA8 30S ribosomal protein S5 OS=Staphylococcus aureus (strain NCTC 8325) GN=rpsE PE=3 SV=1	-0.150884	0.19756	0.370945	-0.543194	-0.280405		10	10	10	63.9	63.9	63.9	0	94.676	10	10	10	7	8	10	7	8	10	7	8	10	1.0621	0.93513	38.002	21	0	1.883	20.088	7	0	0.67727	27.835	5	0	0.78253	33.125	9	0	53.6	59.6	63.9
Q2FW27	Q2FW27	Adenylate kinase	>tr|Q2FW27|Q2FW27_STAA8 Adenylate kinase OS=Staphylococcus aureus (strain NCTC 8325) GN=adk PE=3 SV=1	-0.0513692	0.308476	-0.174377	0.0113525	0.00891703		13	13	13	63.3	63.3	63.3	0	85.565	13	13	13	7	12	11	7	12	11	7	12	11	1.0626	0.94924	37.165	25	0	1.3183	20.726	5	0	1.0487	34.354	9	0	0.97607	44.627	11	0	39.5	60	51.2
Q2FW28	Q2FW28	Translation initiation factor IF-1	>sp|Q2FW28|IF1_STAA8 Translation initiation factor IF-1 OS=Staphylococcus aureus (strain NCTC 8325) GN=infA PE=3 SV=1	-0.240692	0.131412	0.312898	NaN	-0.794282		4	4	4	77.8	77.8	77.8	0	15.79	4	4	4	3	1	2	3	1	2	3	1	2	1.5485	1.0533	36.507	3	0	1.8502	32.394	4	2	NaN	NaN	1	0	0.54758	31.166	2	2	47.2	25	52.8
Q2FW30	Q2FW30	30S ribosomal protein S13	>sp|Q2FW30|RS13_STAA8 30S ribosomal protein S13 OS=Staphylococcus aureus (strain NCTC 8325) GN=rpsM PE=3 SV=1	-0.364024	0.340543	0.425244	-0.675189	-0.842128		15	15	15	62.8	62.8	62.8	0	41.71	15	15	15	12	10	11	12	10	11	12	10	11	1.1419	0.96577	75.604	22	0	2.0307	23.303	8	0	0.62032	38.241	6	0	0.55877	115.14	8	0	55.4	62.8	62.8
Q2FW31	Q2FW31	30S ribosomal protein S11	>sp|Q2FW31|RS11_STAA8 30S ribosomal protein S11 OS=Staphylococcus aureus (strain NCTC 8325) GN=rpsK PE=3 SV=1	-0.00265882	0.00806151	0.032242	-0.194542	0.154324		6	6	6	34.9	34.9	34.9	0	59.306	6	6	6	4	5	6	4	5	6	4	5	6	1.0594	1.035	25.542	15	0	1.4616	10.635	4	0	0.91926	24.74	5	0	1.0451	22.586	6	0	20.9	26.4	34.9
Q2FW32	Q2FW32	DNA-directed RNA polymerase subunit alpha	>sp|Q2FW32|RPOA_STAA8 DNA-directed RNA polymerase subunit alpha OS=Staphylococcus aureus (strain NCTC 8325) GN=rpoA PE=3 SV=1	-0.105709	0.467698	0.000576886	-0.0434377	-0.274268		23	23	23	70.4	70.4	70.4	0	134.19	23	23	23	17	16	16	17	16	16	17	16	16	1.0467	0.95365	30.424	39	0	1.5172	31.937	12	0	1.013	27.515	15	0	0.78803	28.448	12	0	57.6	58.9	65.3
Q2FW33	Q2FW33	50S ribosomal protein L17	>sp|Q2FW33|RL17_STAA8 50S ribosomal protein L17 OS=Staphylococcus aureus (strain NCTC 8325) GN=rplQ PE=3 SV=1	1.0621	1.12602	0.472592	1.51202	1.2017		5	5	5	37.7	37.7	37.7	0	130.75	5	5	5	5	2	3	5	2	3	5	2	3	2.1367	1.5335	38.185	5	0	2.0366	30.933	3	0	2.9357	135.41	4	3	2.2178	157.46	5	4	37.7	16.4	25.4
Q2FW38	Q2FW38	50S ribosomal protein L13	>sp|Q2FW38|RL13_STAA8 50S ribosomal protein L13 OS=Staphylococcus aureus (strain NCTC 8325) GN=rplM PE=3 SV=1	0.151227	0.138262	0.902807	-0.283545	-0.16558		18	18	18	96.6	96.6	96.6	0	84.616	18	18	18	15	14	17	15	14	17	15	14	17	1.1121	1.0964	61.341	38	0	2.6043	38.65	12	0	0.81662	26.95	12	0	0.89718	71.5	14	0	84.8	84.8	96.6
Q2FW39	Q2FW39	30S ribosomal protein S9	>sp|Q2FW39|RS9_STAA8 30S ribosomal protein S9 OS=Staphylococcus aureus (strain NCTC 8325) GN=rpsI PE=3 SV=1	-0.132349	0.0773406	0.99458	-0.788664	-0.602964		10	10	10	65.2	65.2	65.2	0	93.949	10	10	10	8	9	7	8	9	7	8	9	7	0.77609	0.69377	71.139	21	0	3.0568	56.867	8	0	0.62171	21.008	6	0	0.64433	62.631	7	0	48.5	65.2	48.5
Q2FW52	Q2FW52	Uncharacterized hydrolase SAOUHSC_02465	>sp|Q2FW52|Y2465_STAA8 Uncharacterized hydrolase SAOUHSC_02465 OS=Staphylococcus aureus (strain NCTC 8325) GN=SAOUHSC_02465 PE=3 SV=1	0.185453	0.567447	0.401958	0.178492	-0.0240911		9	9	9	42.1	42.1	42.1	0	45.046	9	9	9	7	7	6	7	7	6	7	7	6	1.1723	1.1554	26.023	10	0	1.7841	41.082	6	4	1.124	12.397	4	0	0.93711	36.605	4	0	33.2	34.3	30.6
Q2FW62	Q2FW62	Putative uncharacterized protein	>tr|Q2FW62|Q2FW62_STAA8 Putative uncharacterized protein OS=Staphylococcus aureus (strain NCTC 8325) GN=SAOUHSC_02445 PE=4 SV=1	-0.350183	0.937062	-0.198974	-0.241185	-0.610389		6	6	6	29.4	29.4	29.4	0	18.061	6	6	6	3	2	5	3	2	5	3	2	5	0.96952	0.90195	28.089	6	0	1.1962	40.238	3	0	0.83189	21.335	2	0	0.60119	43.599	5	4	11.7	8.1	25.8
Q2FW66	Q2FW66	Alkaline shock protein 23	>sp|Q2FW66|ASP23_STAA8 Alkaline shock protein 23 OS=Staphylococcus aureus (strain NCTC 8325) GN=asp23 PE=3 SV=1	-0.223798	0.150253	0.660929	-1.13106	-0.201261		8	8	8	54.4	54.4	54.4	0	298.73	8	8	8	7	7	7	7	7	7	7	7	7	0.77544	0.78891	66.604	20	0	2.3813	19.455	5	0	0.49175	56.571	8	0	0.84305	32.647	7	0	50.3	53.3	53.3
Q2FW70	Q2FW70	Putative uncharacterized protein	>tr|Q2FW70|Q2FW70_STAA8 Putative uncharacterized protein OS=Staphylococcus aureus (strain NCTC 8325) GN=SAOUHSC_02436 PE=4 SV=1	0.0188092	0.045262	0.157561	0.147437	-0.248571		10	10	10	16.6	16.6	16.6	0	24.09	10	10	10	6	7	8	6	7	8	6	7	8	1.1409	1.0291	21.745	13	0	1.4846	18.277	5	0	1.1137	15.276	4	0	0.81053	11.583	4	0	10.6	11.9	12.9
Q2FW75	Q2FW75	ABC transporter periplasmic binding protein, putative	>tr|Q2FW75|Q2FW75_STAA8 ABC transporter periplasmic binding protein, putative OS=Staphylococcus aureus (strain NCTC 8325) GN=SAOUHSC_02430 PE=4 SV=1	0.0678569	0.122829	0.444137	-0.0935557	-0.14701		18	18	18	43.4	43.4	43.4	0	144.51	18	18	18	16	15	15	16	15	15	16	15	15	1.0713	1.0597	36.029	31	0	1.8671	15.091	12	0	0.95105	22.906	9	0	0.86022	52.474	10	0	37.6	39.8	42.5
Q2FW79	Q2FW79	UPF0457 protein SAOUHSC_02425	>sp|Q2FW79|Y2425_STAA8 UPF0457 protein SAOUHSC_02425 OS=Staphylococcus aureus (strain NCTC 8325) GN=SAOUHSC_02425 PE=3 SV=1	0.0703007	0.139873	0.307079	-0.267896	0.171719		6	6	6	67.4	67.4	67.4	0	112.27	6	6	6	5	5	4	5	5	4	5	5	4	1.0506	1.0357	32.369	10	0	1.8652	11.783	3	0	0.83664	22.34	4	0	1.0953	40.324	3	0	59.3	62.8	59.3
Q2FW81	Q2FW81	Probable uridylyltransferase SAOUHSC_02423	>sp|Q2FW81|URTF_STAA8 Probable uridylyltransferase SAOUHSC_02423 OS=Staphylococcus aureus (strain NCTC 8325) GN=SAOUHSC_02423 PE=3 SV=1	0.040286	0.2571	0.145221	0.0265876	-0.0509507		18	18	18	48.1	48.1	48.1	0	104.08	18	18	18	16	16	17	16	16	17	16	16	17	1.0783	1.0233	15.62	36	0	1.481	11.079	11	0	1.0236	16.527	12	0	0.93563	16.858	13	0	46.6	46.6	44.8
Q2FW86	Q2FW86	Putative uncharacterized protein	>tr|Q2FW86|Q2FW86_STAA8 Putative uncharacterized protein OS=Staphylococcus aureus (strain NCTC 8325) GN=SAOUHSC_02417 PE=4 SV=1	-0.109821	0.108836	0.46069	-0.720612	-0.0695427		5	5	5	26.8	26.8	26.8	0	20.437	5	5	5	3	2	4	3	2	4	3	2	4	0.8686	0.95294	35.516	7	0	2.0401	19.163	2	0	0.60916	14.112	2	0	0.8686	11.96	3	0	13.2	10.2	23.7
Q2FW91	Q2FW91	Arginase	>tr|Q2FW91|Q2FW91_STAA8 Arginase OS=Staphylococcus aureus (strain NCTC 8325) GN=SAOUHSC_02409 PE=3 SV=1	0.0859155	0.113726	0.557386	-0.325377	0.0257376		17	17	17	66.2	66.2	66.2	0	77.021	17	17	17	14	15	14	14	15	14	14	15	14	1.1232	1.0392	42.165	31	0	2.3018	29.529	11	0	0.83261	28.393	10	0	0.96948	36.308	10	0	51	57.9	57
Q2FW96	Q2FW96	Mannitol-1-phosphate 5-dehydrogenase	>sp|Q2FW96|MTLD_STAA8 Mannitol-1-phosphate 5-dehydrogenase OS=Staphylococcus aureus (strain NCTC 8325) GN=mtlD PE=3 SV=1	0.185436	0.354034	0.264476	0.477159	-0.185327		6	6	6	22	22	22	0	16.915	6	6	6	3	3	4	3	3	4	3	3	4	0.83876	0.87945	15.651	3	0	1.6381	11.787	2	1	1.4191	75.009	2	1	0.83588	20.327	3	2	12.2	13	16.3
Q2FWA0	Q2FWA0	Glutamine--fructose-6-phosphate aminotransferase [isomerizing]	>tr|Q2FWA0|Q2FWA0_STAA8 Glutamine--fructose-6-phosphate aminotransferase [isomerizing] OS=Staphylococcus aureus (strain NCTC 8325) GN=glmS PE=3 SV=1	-0.0232149	0.329102	-0.049666	0.0291349	-0.0491135		40	40	40	71.7	71.7	71.7	0	323.31	40	40	40	36	36	37	36	36	37	36	36	37	1.0728	0.98434	34.448	118	0	1.4354	25.894	36	0	1.0819	33.201	40	0	0.91599	41.303	42	0	61.6	69.9	71.7
Q2FWA2	Q2FWA2	Putative uncharacterized protein	>tr|Q2FWA2|Q2FWA2_STAA8 Putative uncharacterized protein OS=Staphylococcus aureus (strain NCTC 8325) GN=SAOUHSC_02396 PE=4 SV=1	0.360639	0.318716	1.19188	-0.146148	0.0361869		10	10	10	50.9	50.9	50.9	0	86.811	10	10	10	7	5	7	7	5	7	7	5	7	1.068	1.1023	53.371	7	0	3.3172	61.074	6	4	0.90707	32.197	4	2	0.95287	73.997	3	0	40	22.1	40.7
Q2FWB5	Q2FWB5	Putative uncharacterized protein	>tr|Q2FWB5|Q2FWB5_STAA8 Putative uncharacterized protein OS=Staphylococcus aureus (strain NCTC 8325) GN=SAOUHSC_02383 PE=4 SV=1	0.236569	1.08878	0.142479	0.18916	0.378068		5	5	5	14.4	14.4	14.4	0	38.29	5	5	5	3	4	4	3	4	4	3	4	4	1.163	1.0069	26.228	6	0	1.5676	30.576	2	0	1.1572	88.695	3	1	1.1689	68.578	3	1	9.6	12.7	11.4
Q2FWB7	Q2FWB7	Putative uncharacterized protein	>tr|Q2FWB7|Q2FWB7_STAA8 Putative uncharacterized protein OS=Staphylococcus aureus (strain NCTC 8325) GN=SAOUHSC_02381 PE=3 SV=1	-0.131275	0.317177	0.136323	-0.135887	-0.394259		7	7	7	84.4	84.4	84.4	0	195.95	7	7	7	7	6	7	7	6	7	7	6	7	1.1467	0.98628	35.268	24	0	1.6943	16.487	9	0	0.99843	17.669	6	0	0.70618	49.699	9	0	84.4	69.4	84.4
Q2FWB8	Q2FWB8	Purine nucleoside phosphorylase DeoD-type	>tr|Q2FWB8|Q2FWB8_STAA8 Purine nucleoside phosphorylase DeoD-type OS=Staphylococcus aureus (strain NCTC 8325) GN=deoD PE=3 SV=1	-0.114196	0.564933	-0.253189	0.00906043	-0.0984592		14	14	14	62.3	62.3	62.3	0	239.63	14	14	14	11	12	13	11	12	13	11	12	13	1.0782	0.93403	46.282	44	0	1.2588	20.542	13	0	1.0714	53.07	15	0	0.88777	55.38	16	0	55.5	62.3	62.3
Q2FWB9	Q2FWB9	Deoxyribose-phosphate aldolase	>tr|Q2FWB9|Q2FWB9_STAA8 Deoxyribose-phosphate aldolase OS=Staphylococcus aureus (strain NCTC 8325) GN=deoC PE=3 SV=1	-0.110261	0.18204	0.31742	-0.312778	-0.335426		10	10	3	57.3	57.3	15.5	0	111.54	10	10	3	8	6	10	8	6	10	2	2	3	1.055	0.98784	38.365	21	0	1.8404	26.161	7	0	0.84836	29.752	6	0	0.75997	33.109	8	0	45.9	34.1	57.3
Q2FWC1	Q2FWC1	Pyrimidine-nucleoside phosphorylase	>sp|Q2FWC1|PDP_STAA8 Pyrimidine-nucleoside phosphorylase OS=Staphylococcus aureus (strain NCTC 8325) GN=pdp PE=3 SV=1	-0.0240033	0.0223655	0.64607	-0.285548	-0.432532		16	16	16	55.2	55.2	55.2	0	287.38	16	16	16	14	12	13	14	12	13	14	12	13	0.91493	0.90127	41.383	35	0	2.3997	18.523	10	0	0.8555	31.983	14	0	0.70415	19.085	11	0	49.4	38.8	47.6
Q2FWC3	Q2FWC3	S-ribosylhomocysteine lyase	>sp|Q2FWC3|LUXS_STAA8 S-ribosylhomocysteine lyase OS=Staphylococcus aureus (strain NCTC 8325) GN=luxS PE=3 SV=1	0.191428	0.988968	0.180275	0.0821575	0.311852		7	7	7	37.8	37.8	37.8	0	87.723	7	7	7	7	7	6	7	7	6	7	7	6	1.2428	1.1343	28.835	21	0	1.6429	15.803	6	0	1.1055	25.433	8	0	1.1625	34.207	7	0	37.8	37.8	37.8
Q2FWC4	Q2FWC4	Aminobenzoyl-glutamate utilization protein B, putative	>tr|Q2FWC4|Q2FWC4_STAA8 Aminobenzoyl-glutamate utilization protein B, putative OS=Staphylococcus aureus (strain NCTC 8325) GN=SAOUHSC_02374 PE=4 SV=1	-0.0321443	0.156536	-0.173287	0.0592169	0.0176369		12	12	12	32.5	32.5	32.5	0	30.46	12	12	12	8	10	12	8	10	12	8	10	12	1.0658	0.9449	25.324	20	0	1.3136	24.295	7	0	1.0637	20.01	6	0	0.95964	28.927	7	0	21.6	26.4	32.5
Q2FWC5	Q2FWC5	Putative uncharacterized protein	>tr|Q2FWC5|Q2FWC5_STAA8 Putative uncharacterized protein OS=Staphylococcus aureus (strain NCTC 8325) GN=SAOUHSC_02373 PE=4 SV=1	0.0354618	0.0162553	NaN	0.649294	-0.57837		4	4	4	12.3	12.3	12.3	0	15.353	4	4	4	2	2	3	2	2	3	2	2	3	1.0164	1.0394	62.376	4	3	NaN	NaN	0	0	1.5748	45.042	2	1	0.62796	49.014	2	2	7.6	7.6	7.8
Q2FWC6	Q2FWC6	Putative uncharacterized protein	>tr|Q2FWC6|Q2FWC6_STAA8 Putative uncharacterized protein OS=Staphylococcus aureus (strain NCTC 8325) GN=SAOUHSC_02372 PE=4 SV=1	0.0427426	0.125361	0.0399806	-0.157979	0.246226		6	6	6	30	30	30	0	23.752	6	6	6	3	4	5	3	4	5	3	4	5	1.079	0.95995	23.021	6	0	1.4976	35.275	3	1	0.86771	40.177	5	3	1.0714	17.313	3	1	14.3	19.3	25.1
Q2FWC7	Q2FWC7	Type II pantothenate kinase	>sp|Q2FWC7|COAW_STAA8 Type II pantothenate kinase OS=Staphylococcus aureus (strain NCTC 8325) GN=coaW PE=1 SV=1	-0.209873	0.398044	0.0558898	-0.0889297	-0.59658		5	5	5	23.2	23.2	23.2	0	10.322	5	5	5	3	3	3	3	3	3	3	3	3	1.0577	1.0395	48.295	5	0	1.4328	62.112	3	2	0.94337	29.294	2	0	0.62877	81.379	2	0	10.9	16.5	16.5
Q2FWC9	Q2FWC9	Putative uncharacterized protein	>tr|Q2FWC9|Q2FWC9_STAA8 Putative uncharacterized protein OS=Staphylococcus aureus (strain NCTC 8325) GN=SAOUHSC_02370 PE=4 SV=1	0.0142328	0.0214952	0.201508	NaN	-0.173043		4	4	4	17.1	17.1	17.1	0	27.553	4	4	4	4	2	2	4	2	2	4	2	2	1.2558	1.0215	34.944	6	0	1.6885	27.917	3	0	NaN	NaN	1	0	0.84248	57.735	2	0	17.1	9.8	9.1
Q2FWD1	Q2FWD1	CTP synthase	>sp|Q2FWD1|PYRG_STAA8 CTP synthase OS=Staphylococcus aureus (strain NCTC 8325) GN=pyrG PE=3 SV=1	0.18578	0.84438	0.0434844	0.316493	0.197362		23	23	23	53.2	53.2	53.2	0	99.888	23	23	23	21	22	20	21	22	20	21	22	20	1.4005	1.1234	27.567	51	0	1.4907	20.187	17	0	1.3099	24.194	16	0	1.1131	35.665	18	0	47.9	46.8	43.3
Q2FWD3	Q2FWD3	Putative uncharacterized protein	>tr|Q2FWD3|Q2FWD3_STAA8 Putative uncharacterized protein OS=Staphylococcus aureus (strain NCTC 8325) GN=SAOUHSC_02366 PE=4 SV=1	0.0753557	0.320638	0.216362	0.0932897	-0.0835845		17	17	17	85.3	85.3	85.3	0	323.31	17	17	17	14	12	16	14	12	16	14	12	16	1.116	1.0473	24.25	53	0	1.8244	32.606	15	0	1.1259	17.604	18	0	0.92798	22.03	20	0	64.7	61.5	85.3
Q2FWD4	Q2FWD4	UDP-N-acetylglucosamine 1-carboxyvinyltransferase	>tr|Q2FWD4|Q2FWD4_STAA8 UDP-N-acetylglucosamine 1-carboxyvinyltransferase OS=Staphylococcus aureus (strain NCTC 8325) GN=murA PE=3 SV=1	-0.185925	0.396192	0.165944	-0.351847	-0.37187		10	10	10	38.9	38.9	38.9	0	137.51	10	10	10	9	7	9	9	7	9	9	7	9	1.1301	1.0026	35.105	16	0	1.5918	30.722	6	0	0.79456	26.567	5	0	0.71762	32.947	5	0	36.3	29.4	36.3
Q2FWD6	Q2FWD6	Putative aldehyde dehydrogenase SAOUHSC_02363	>sp|Q2FWD6|ALD1_STAA8 Putative aldehyde dehydrogenase SAOUHSC_02363 OS=Staphylococcus aureus (strain NCTC 8325) GN=SAOUHSC_02363 PE=3 SV=1	0.0275804	0.137398	0.133827	-0.102388	0.0513026		20	20	20	57.1	57.1	57.1	0	82.166	20	20	20	12	13	18	12	13	18	12	13	18	1.0211	1.0362	23.203	28	0	1.6053	16.213	6	0	0.94261	19.301	10	0	1.0036	23.926	12	0	33.9	34.3	54.3
Q2FWD7	Q2FWD7	Transcription termination factor Rho	>tr|Q2FWD7|Q2FWD7_STAA8 Transcription termination factor Rho OS=Staphylococcus aureus (strain NCTC 8325) GN=rho PE=3 SV=1	0.0568463	0.0625549	0.32262	NaN	-0.208928		4	4	4	11	11	11	0	2.6407	4	4	4	2	2	2	2	2	2	2	2	2	1.1548	1.0177	22.688	4	0	1.6852	12.245	2	0	NaN	NaN	0	0	0.82316	6.0734	2	0	5.9	6.4	4.6
Q2FWD8	Q2FWD8	50S ribosomal protein L31 type B	>sp|Q2FWD8|RL31B_STAA8 50S ribosomal protein L31 type B OS=Staphylococcus aureus (strain NCTC 8325) GN=rpmE2 PE=3 SV=1	-0.030832	0.0357356	0.438612	-0.514202	-0.0169061		6	6	6	73.8	73.8	73.8	0	58.367	6	6	6	6	5	5	6	5	5	6	5	5	0.96035	0.98835	73.454	15	0	2.0531	14.793	4	0	0.68961	27.833	6	0	0.96035	119.68	5	0	73.8	73.8	73.8
Q2FWE0	Q2FWE0	Peptide chain release factor 1	>sp|Q2FWE0|RF1_STAA8 Peptide chain release factor 1 OS=Staphylococcus aureus (strain NCTC 8325) GN=prfA PE=3 SV=1	0.404308	0.25161	0.89344	NaN	-0.0848233		3	3	3	8.4	8.4	8.4	0	9.7654	3	3	3	3	1	2	3	1	2	3	1	2	1.31	1.2779	41.195	5	0	2.5385	17.695	3	1	NaN	NaN	1	0	0.90767	22.579	2	0	8.4	6.4	8.4
Q2FWE5	Q2FWE5	Serine hydroxymethyltransferase	>sp|Q2FWE5|GLYA_STAA8 Serine hydroxymethyltransferase OS=Staphylococcus aureus (strain NCTC 8325) GN=glyA PE=3 SV=1	0.0219454	0.0535667	-0.241936	0.180403	0.127369		26	26	26	55.8	55.8	55.8	0	256.13	26	26	26	22	23	26	22	23	26	22	23	26	1.1195	1.0145	33.642	64	0	1.2469	21.982	20	0	1.1797	35.784	20	0	1.041	35.604	24	0	51.7	52.2	55.8
Q2FWE6	Q2FWE6	Uracil phosphoribosyltransferase	>sp|Q2FWE6|UPP_STAA8 Uracil phosphoribosyltransferase OS=Staphylococcus aureus (strain NCTC 8325) GN=upp PE=3 SV=1	0.0627568	0.161838	0.117562	-0.194608	0.265317		14	14	14	79.4	79.4	79.4	0	125.78	14	14	14	13	12	11	13	12	11	13	12	11	1.1798	1.0469	37.02	34	0	1.6364	29.147	11	0	0.89296	15.98	12	0	1.1813	43.197	11	0	68.4	72.2	61.2
Q2FWE8	Q2FWE8	ATP synthase subunit alpha	>sp|Q2FWE8|ATPA_STAA8 ATP synthase subunit alpha OS=Staphylococcus aureus (strain NCTC 8325) GN=atpA PE=3 SV=1	-0.090568	1.18113	-0.0477261	-0.132499	-0.0914791		21	21	21	36.5	36.5	36.5	0	323.31	21	21	21	18	17	17	18	17	17	18	17	17	1.1	0.93856	45.453	51	0	1.4583	37.689	16	0	0.9544	35.532	18	0	0.88836	60.663	17	0	35.9	33.1	32.5
Q2FWE9	Q2FWE9	ATP synthase gamma chain	>tr|Q2FWE9|Q2FWE9_STAA8 ATP synthase gamma chain OS=Staphylococcus aureus (strain NCTC 8325) GN=atpG PE=3 SV=1	0.0316487	0.0209541	0.910195	-0.718735	-0.0965144		8	8	8	42.6	42.6	42.6	0	61.789	8	8	8	8	6	6	8	6	6	8	6	6	0.79972	0.8001	62.965	14	0	2.7387	20.399	4	0	0.6237	31.4	5	0	0.89868	36.383	5	0	42.6	36.2	36.2
Q2FWF0	Q2FWF0	ATP synthase subunit beta	>sp|Q2FWF0|ATPB_STAA8 ATP synthase subunit beta OS=Staphylococcus aureus (strain NCTC 8325) GN=atpD PE=3 SV=1	-0.0649088	0.0562667	0.584193	-0.714515	-0.0644045		21	21	21	61.1	61.1	61.1	0	208.22	21	21	21	16	18	16	16	18	16	16	18	16	0.83035	0.87176	52.387	37	0	2.2209	20.575	11	0	0.6174	23.906	14	0	0.92902	55.255	12	0	50.4	55.1	51.7
Q2FWF1	Q2FWF1	ATP synthase epsilon chain	>sp|Q2FWF1|ATPE_STAA8 ATP synthase epsilon chain OS=Staphylococcus aureus (strain NCTC 8325) GN=atpC PE=3 SV=1	0.409199	0.543054	0.914641	-0.0681051	0.381062		4	4	4	24.6	24.6	24.6	0	12.267	4	4	4	3	2	4	3	2	4	3	2	4	1.3198	1.3106	47.71	15	0	2.4235	15.885	5	0	0.97005	6.0481	4	0	1.2643	60.548	6	0	24.6	24.6	24.6
Q2FWF4	Q2FWF4	UDP-N-acetylglucosamine 1-carboxyvinyltransferase	>tr|Q2FWF4|Q2FWF4_STAA8 UDP-N-acetylglucosamine 1-carboxyvinyltransferase OS=Staphylococcus aureus (strain NCTC 8325) GN=murA PE=3 SV=1	-0.0388097	0.0914174	0.0124972	-0.30627	0.177344		14	14	14	37.1	37.1	37.1	0	84.167	14	14	14	13	8	10	13	8	10	13	8	10	1.0393	0.99394	35.316	18	0	1.4889	20.382	5	0	0.81256	27.316	8	0	1.0611	32.982	5	0	34.2	21.6	28.5
Q2FWF5	Q2FWF5	3-hydroxyacyl-[acyl-carrier-protein] dehydratase FabZ	>sp|Q2FWF5|FABZ_STAA8 3-hydroxyacyl-[acyl-carrier-protein] dehydratase FabZ OS=Staphylococcus aureus (strain NCTC 8325) GN=fabZ PE=3 SV=1	0.266745	0.673273	0.0292761	0.234011	0.536948		4	4	4	34.9	34.9	34.9	0	16.161	4	4	4	2	3	3	2	3	3	2	3	3	1.2949	1.1761	17.223	6	0	1.4806	14.483	2	0	1.2263	0.34361	2	0	1.3786	27.891	3	1	13.7	25.3	23.3
Q2FWF6	Q2FWF6	Putative uncharacterized protein	>tr|Q2FWF6|Q2FWF6_STAA8 Putative uncharacterized protein OS=Staphylococcus aureus (strain NCTC 8325) GN=SAOUHSC_02335 PE=4 SV=1	-0.550139	0.449088	0.268315	-0.589572	-1.32916		3	3	3	23.4	23.4	23.4	0	7.4819	3	3	3	2	2	3	2	2	3	2	2	3	0.68476	0.66454	50.668	6	0	1.71	4.6875	2	0	0.68476	10.099	2	0	0.38201	20.725	2	0	16.2	16.2	23.4
Q2FWG7	Q2FWG7	Putative uncharacterized protein	>tr|Q2FWG7|Q2FWG7_STAA8 Putative uncharacterized protein OS=Staphylococcus aureus (strain NCTC 8325) GN=SAOUHSC_02324 PE=4 SV=1	0.0466022	0.0925357	0.143002	-0.281299	0.278104		3	3	3	22.3	22.3	22.3	0	2.3473	3	3	3	3	2	2	3	2	2	3	2	2	1.566	1.0972	40.238	8	6	1.6231	16.343	3	2	0.80613	58.672	3	3	1.1657	58.724	2	1	22.3	10.2	10.2
Q2FWH3	Q2FWH3	D-alanine--D-alanine ligase	>sp|Q2FWH3|DDL_STAA8 D-alanine--D-alanine ligase OS=Staphylococcus aureus (strain NCTC 8325) GN=ddl PE=3 SV=1	0.0179998	0.264354	-0.0315627	0.0458623	0.0396999		21	21	21	59	59	59	0	281.63	21	21	21	18	20	19	18	20	19	18	20	19	1.1333	1.0262	30.053	55	0	1.4475	20.975	15	0	1.0711	30.947	20	0	0.9559	35.758	20	0	54.5	59	56.2
Q2FWH4	Q2FWH4	UDP-N-acetylmuramoyl-tripeptide--D-alanyl-D-alanine ligase	>tr|Q2FWH4|Q2FWH4_STAA8 UDP-N-acetylmuramoyl-tripeptide--D-alanyl-D-alanine ligase OS=Staphylococcus aureus (strain NCTC 8325) GN=SAOUHSC_02317 PE=3 SV=1	0.0860563	0.718293	0.0779266	0.0137839	0.166458		15	15	15	38.9	38.9	38.9	0	126.94	15	15	15	10	12	12	10	12	12	10	12	12	1.1523	1.0668	21.788	25	0	1.5228	19.742	6	0	1.0301	12.58	9	0	1.0787	29.866	10	0	28.5	30.1	37.4
Q2FWH5	Q2FWH5	DEAD-box ATP-dependent RNA helicase CshA	>sp|Q2FWH5|CSHA_STAA8 DEAD-box ATP-dependent RNA helicase CshA OS=Staphylococcus aureus (strain NCTC 8325) GN=cshA PE=1 SV=1	0.179675	0.594074	0.0962619	0.0382958	0.404467		4	4	4	11.3	11.3	11.3	0	3.3958	4	4	4	3	3	2	3	3	2	3	3	2	1.064	1.0141	40.071	6	0	1.3894	34.946	2	0	1.0945	69.738	3	1	1.2913	39.451	2	0	9.1	9.1	6.9
Q2FWJ5	Q2FWJ5	S1 RNA binding domain protein	>tr|Q2FWJ5|Q2FWJ5_STAA8 S1 RNA binding domain protein OS=Staphylococcus aureus (strain NCTC 8325) GN=SAOUHSC_02297 PE=4 SV=1	-0.00595863	0.0638361	0.00129789	0.0429245	-0.0620982		16	16	16	28.9	28.9	28.9	0	55.36	16	16	16	13	12	9	13	12	9	13	12	9	1.1289	1.0009	26.002	20	0	1.4323	13.289	6	0	1.0289	30.205	7	0	0.96046	32.32	7	0	24.7	22.9	16.5
Q2FWK4	Q2FWK4	Ketol-acid reductoisomerase	>sp|Q2FWK4|ILVC_STAA8 Ketol-acid reductoisomerase OS=Staphylococcus aureus (strain NCTC 8325) GN=ilvC PE=3 SV=1	-0.128932	0.334488	-0.0944488	0.100036	-0.392383		17	17	17	61.1	61.1	61.1	0	141.1	17	17	17	15	12	14	15	12	14	15	12	14	1.1141	0.94977	31.532	37	0	1.3449	19.995	12	0	1.0924	37.208	12	0	0.73549	31.09	13	0	53.9	45.5	54.5
Q2FWK6	Q2FWK6	Acetolactate synthase	>tr|Q2FWK6|Q2FWK6_STAA8 Acetolactate synthase OS=Staphylococcus aureus (strain NCTC 8325) GN=SAOUHSC_02282 PE=3 SV=1	-0.158607	0.354854	0.0350608	-0.0204868	-0.490395		7	7	7	16.3	16.3	16.3	0	42.969	7	7	7	6	6	4	6	6	4	6	6	4	0.95882	0.95101	26.348	6	0	1.3947	100.99	7	5	0.97331	120.43	5	3	0.6867	39.155	3	1	14.1	13.4	9
Q2FWL2	Q2FWL2	tRNA N6-adenosine threonylcarbamoyltransferase	>sp|Q2FWL2|TSAD_STAA8 tRNA N6-adenosine threonylcarbamoyltransferase OS=Staphylococcus aureus (strain NCTC 8325) GN=tsaD PE=1 SV=1	0.21182	0.636961	0.454281	0.138814	0.0423643		2	2	2	6.5	6.5	6.5	0	9.2346	2	2	2	2	1	2	2	1	2	2	1	2	1.1388	1.1402	8.2783	4	0	1.8544	11.696	2	1	1.1095	5.0563	2	1	1.0121	17.038	3	1	6.5	3.2	6.5
Q2FWL3	Q2FWL3	MutS domain V protein	>tr|Q2FWL3|Q2FWL3_STAA8 MutS domain V protein OS=Staphylococcus aureus (strain NCTC 8325) GN=SAOUHSC_02276 PE=4 SV=1	-0.283508	0.469424	0.0889556	-0.696845	-0.242635		5	5	5	10.4	10.4	10.4	0	27.492	5	5	5	5	3	4	5	3	4	5	3	4	1.2887	1.0636	31.275	7	0	1.433	31.021	3	0	0.63531	65.762	4	3	0.80952	38.95	3	0	10.4	6.5	8.2
Q2FWM1	Q2FWM1	Sucrose-6-phosphate dehydrogenase, putative	>tr|Q2FWM1|Q2FWM1_STAA8 Sucrose-6-phosphate dehydrogenase, putative OS=Staphylococcus aureus (strain NCTC 8325) GN=SAOUHSC_02268 PE=4 SV=1	-0.0505881	0.316273	-0.168706	0.015212	0.00173014		23	23	23	49	49	49	0	226.46	23	23	23	23	21	22	23	21	22	23	21	22	1.0879	0.99683	24.292	57	0	1.3434	21.692	19	0	1.0879	21.642	19	0	0.95697	28.475	19	0	49	44.7	44.7
Q2FWM4	Q2FWM4	Accessory gene regulator protein A	>tr|Q2FWM4|Q2FWM4_STAA8 Accessory gene regulator protein A OS=Staphylococcus aureus (strain NCTC 8325) GN=SAOUHSC_02265 PE=4 SV=1	0.205275	2.26764	0.181675	0.20063	0.23352		11	11	11	41.8	41.8	41.8	0	78.198	11	11	11	7	11	10	7	11	10	7	11	10	1.4347	1.1548	39.848	28	0	1.6579	9.7181	7	0	1.1849	36.214	10	0	1.1293	54.587	11	0	34.6	41.8	37.5
Q2FWM9	Q2FWM9	Putative uncharacterized protein	>tr|Q2FWM9|Q2FWM9_STAA8 Putative uncharacterized protein OS=Staphylococcus aureus (strain NCTC 8325) GN=SAOUHSC_02259 PE=4 SV=1	0.661879	1.45677	0.761711	0.409581	0.814345		6	6	6	23.8	23.8	23.8	0	26.489	6	6	6	5	6	5	5	6	5	5	6	5	1.7075	1.6955	23.09	7	0	2.3237	21.361	3	0	1.325	32.63	3	0	1.7005	59.431	5	4	20.7	23.8	18.4
Q2FWN3	Q2FWN3	10 kDa chaperonin	>sp|Q2FWN3|CH10_STAA8 10 kDa chaperonin OS=Staphylococcus aureus (strain NCTC 8325) GN=groS PE=3 SV=1	-0.0946454	0.0508892	1.04495	-0.998443	-0.330447		9	9	9	89.4	89.4	89.4	0	45.565	9	9	9	6	6	7	6	6	7	6	6	7	0.91149	0.90149	73.023	14	0	2.7491	49.066	3	0	0.4938	70.253	5	0	0.75196	69.853	6	0	61.7	71.3	75.5
Q2FWN4	Q2FWN4	60 kDa chaperonin	>sp|Q2FWN4|CH60_STAA8 60 kDa chaperonin OS=Staphylococcus aureus (strain NCTC 8325) GN=groL PE=3 SV=1	-0.344881	0.275704	0.565305	-0.889476	-0.710472		26	26	26	52.6	52.6	52.6	0	323.31	26	26	26	22	24	24	22	24	24	22	24	24	0.75703	0.79296	68.88	50	0	2.158	32.759	17	0	0.55731	49.77	16	0	0.58304	68.347	17	0	48	52.6	47.4
Q2FWN8	Q2FWN8	Putative uncharacterized protein	>tr|Q2FWN8|Q2FWN8_STAA8 Putative uncharacterized protein OS=Staphylococcus aureus (strain NCTC 8325) GN=SAOUHSC_02244 PE=4 SV=1	-1.24997	0.435696	NaN	-2.06178	-0.438151		3	3	3	7.6	7.6	7.6	0	3.6389	3	3	3	0	2	2	0	2	2	0	2	2	0.5001	0.50638	95.592	4	4	NaN	NaN	0	0	0.24482	108.04	2	2	0.70555	55.45	2	2	0	6.1	7.6
Q2FWR2	Q2FWR2	Conserved hypothetical phage protein	>tr|Q2FWR2|Q2FWR2_STAA8 Conserved hypothetical phage protein OS=Staphylococcus aureus (strain NCTC 8325) GN=SAOUHSC_02218 PE=4 SV=1	0.0674021	0.140962	-0.243592	0.12618	0.319618		7	7	7	81.7	81.7	81.7	0	31.532	7	7	7	7	6	6	7	6	6	7	6	6	1.2662	1.1004	19.105	12	0	1.2768	14.602	5	0	1.1189	10.527	3	0	1.2038	8.1027	4	0	81.7	81.7	81.7
Q2FWW1	Q2FWW1	MHC class II analog protein	>tr|Q2FWW1|Q2FWW1_STAA8 MHC class II analog protein OS=Staphylococcus aureus (strain NCTC 8325) GN=SAOUHSC_02161 PE=4 SV=1	0.498587	0.653513	1.06633	0.175684	0.253747		34	34	34	49.1	49.1	49.1	0	247.83	34	34	34	23	27	29	23	27	29	23	27	29	1.2144	1.2127	53.584	67	0	3.1196	36.585	16	0	1.1399	36.426	23	0	1.1652	66.223	28	0	35.6	40.6	43
Q2FWW3	Q2FWW3	Putative uncharacterized protein	>tr|Q2FWW3|Q2FWW3_STAA8 Putative uncharacterized protein OS=Staphylococcus aureus (strain NCTC 8325) GN=SAOUHSC_02158 PE=4 SV=1	-0.0661441	0.339344	0.0701146	-0.0914484	-0.177099		17	17	17	42.8	42.8	42.8	0	294.84	17	17	17	16	14	16	16	14	16	16	14	16	1.0757	0.95186	22.051	37	0	1.5189	14.95	13	0	0.99139	12.981	12	0	0.86901	32.114	12	0	41.8	40	42.8
Q2FWW9	Q2FWW9	ABC transporter, ATP-binding protein, putative	>tr|Q2FWW9|Q2FWW9_STAA8 ABC transporter, ATP-binding protein, putative OS=Staphylococcus aureus (strain NCTC 8325) GN=SAOUHSC_02152 PE=4 SV=1	0.181307	1.41779	0.1129	0.193456	0.237564		14	14	14	42.1	42.1	42.1	0	19.124	14	14	14	10	8	8	10	8	8	10	8	8	1.2103	1.0963	26.263	18	0	1.4415	22.105	6	0	1.1242	11.112	6	0	1.1549	39	6	0	25.2	26.2	30.3
Q2FWX1	Q2FWX1	Putative uncharacterized protein	>tr|Q2FWX1|Q2FWX1_STAA8 Putative uncharacterized protein OS=Staphylococcus aureus (strain NCTC 8325) GN=SAOUHSC_02150 PE=4 SV=1	-0.0800645	0.269605	0.136716	-0.178714	-0.198196		18	18	18	69.5	69.5	69.5	0	323.31	18	18	18	17	17	17	17	17	17	17	17	17	1.1113	0.98366	62.095	50	0	1.6272	34.766	16	0	0.9454	45.3	15	0	0.8331	86.722	19	0	69	64.7	64.7
Q2FWX2	Q2FWX2	Putative uncharacterized protein	>tr|Q2FWX2|Q2FWX2_STAA8 Putative uncharacterized protein OS=Staphylococcus aureus (strain NCTC 8325) GN=SAOUHSC_02149 PE=4 SV=1	-0.152769	0.527492	NaN	-0.0758849	-0.229653		4	4	4	19	19	19	0	5.1125	4	4	4	2	3	3	2	3	3	2	3	3	0.96843	0.94876	21.584	6	0	NaN	NaN	1	0	0.96373	14.521	2	0	0.88794	26.791	3	0	9.2	13.8	14.9
Q2FWX5	Q2FWX5	Putative uncharacterized protein	>tr|Q2FWX5|Q2FWX5_STAA8 Putative uncharacterized protein OS=Staphylococcus aureus (strain NCTC 8325) GN=SAOUHSC_02146 PE=4 SV=1	3.43493	2.46723	3.23281	3.83714	3.23485		15	15	15	48.8	48.8	48.8	0	166.49	15	15	15	10	14	11	10	14	11	10	14	11	15.268	13.46	34.424	7	0	14.452	61.789	12	10	14.886	31.065	3	0	8.9848	71.296	12	10	41	48.8	40.5
Q2FWX6	Q2FWX6	Putative uncharacterized protein	>tr|Q2FWX6|Q2FWX6_STAA8 Putative uncharacterized protein OS=Staphylococcus aureus (strain NCTC 8325) GN=SAOUHSC_02145 PE=4 SV=1	0.171343	0.158765	-0.0363927	-0.351921	0.902344		2	2	2	19.3	19.3	19.3	0	4.5145	2	2	2	2	2	2	2	2	2	2	2	2	1.2216	0.88956	22.549	4	0	1.4845	48.397	3	1	0.829	79.536	3	2	1.765	53.26	2	1	19.3	19.3	19.3
Q2FWX8	Q2FWX8	Uncharacterized protein SAOUHSC_02143	>sp|Q2FWX8|Y2143_STAA8 Uncharacterized protein SAOUHSC_02143 OS=Staphylococcus aureus (strain NCTC 8325) GN=SAOUHSC_02143 PE=3 SV=1	-0.347304	0.451484	-0.00814535	-0.10967	-0.924098		23	23	23	73.7	73.7	73.7	0	136.8	23	23	23	18	18	19	18	18	19	18	18	19	1.0604	0.91209	49.835	37	0	1.3939	34.639	13	0	0.95405	30.169	12	0	0.49686	67.088	12	0	65.8	66.7	70.8
Q2FWX9	Q2FWX9	Aldehyde dehydrogenase	>tr|Q2FWX9|Q2FWX9_STAA8 Aldehyde dehydrogenase OS=Staphylococcus aureus (strain NCTC 8325) GN=SAOUHSC_02142 PE=3 SV=1	0.157271	0.469006	0.381173	0.147176	-0.0565362		10	10	10	26.1	26.1	26.1	0	76.124	10	10	10	7	9	10	7	9	10	7	9	10	1.2242	1.1399	26.051	22	0	1.9232	14.898	6	0	1.1477	24.941	9	0	0.93906	28.949	7	0	20.5	24.6	26.1
Q2FWY1	Q2FWY1	Probable manganese-dependent inorganic pyrophosphatase	>sp|Q2FWY1|PPAC_STAA8 Probable manganese-dependent inorganic pyrophosphatase OS=Staphylococcus aureus (strain NCTC 8325) GN=ppaC PE=3 SV=1	-0.00664867	0.0974236	-0.00701405	-0.0461612	0.0332292		14	14	14	55.3	55.3	55.3	0	107.4	14	14	14	14	13	13	14	13	13	14	13	13	1.0502	0.99515	28.169	35	0	1.4987	27.022	11	0	1.0261	29.014	11	0	0.97037	30.628	13	0	55.3	48.5	47.6
Q2FWY4	Q2FWY4	Sodium-dependent dicarboxylate transporter SdcS	>sp|Q2FWY4|SDCS_STAA8 Sodium-dependent dicarboxylate transporter SdcS OS=Staphylococcus aureus (strain NCTC 8325) GN=sdcS PE=3 SV=1	-0.276717	0.310058	0.136848	-0.928429	-0.0385693		2	2	2	3.5	3.5	3.5	0	2.5072	2	2	2	2	2	2	2	2	2	2	2	2	0.96586	0.85781	53.547	8	6	1.5287	53.009	2	1	0.54931	62.926	3	3	0.92953	53.019	3	2	3.5	3.5	3.5
Q2FWY8	Q2FWY8	Aspartyl/glutamyl-tRNA(Asn/Gln) amidotransferase subunit C	>sp|Q2FWY8|GATC_STAA8 Aspartyl/glutamyl-tRNA(Asn/Gln) amidotransferase subunit C OS=Staphylococcus aureus (strain NCTC 8325) GN=gatC PE=3 SV=1	0.0161971	0.0153908	0.472592	-0.621866	0.197865		5	5	5	75	75	75	0	28.183	5	5	5	3	4	5	3	4	5	3	4	5	1.0466	1.147	57.457	13	0	2.0152	46.558	3	0	0.67161	41.35	5	0	1.0466	57.058	5	0	50	73	75
Q2FWY9	Q2FWY9	Glutamyl-tRNA(Gln) amidotransferase subunit A	>sp|Q2FWY9|GATA_STAA8 Glutamyl-tRNA(Gln) amidotransferase subunit A OS=Staphylococcus aureus (strain NCTC 8325) GN=gatA PE=3 SV=1	-0.0306851	0.144364	-0.175599	0.0640551	0.0194884		29	29	29	67	67	67	0	323.31	29	29	29	28	26	25	28	26	25	28	26	25	1.1349	1.0061	23.048	92	0	1.3497	18.247	33	0	1.1184	17.424	30	0	0.97645	30.973	29	0	66	63.3	56.7
Q2FWZ0	Q2FWZ0	Aspartyl/glutamyl-tRNA(Asn/Gln) amidotransferase subunit B	>sp|Q2FWZ0|GATB_STAA8 Aspartyl/glutamyl-tRNA(Asn/Gln) amidotransferase subunit B OS=Staphylococcus aureus (strain NCTC 8325) GN=gatB PE=3 SV=1	-0.0956705	0.843194	-0.0212186	-0.104124	-0.161669		41	41	41	85.7	85.7	85.7	0	323.31	41	41	41	38	39	37	38	39	37	38	39	37	1.0455	0.93769	30.494	107	0	1.4347	29.883	35	0	0.96428	26.868	38	0	0.84876	32.796	34	0	82.1	84.8	85.7
Q2FWZ8	Q2FWZ8	Bacterial non-heme ferritin	>sp|Q2FWZ8|FTN_STAA8 Bacterial non-heme ferritin OS=Staphylococcus aureus (strain NCTC 8325) GN=ftnA PE=1 SV=1	0.167579	0.917597	0.295841	0.0968015	0.110096		17	17	17	61.4	61.4	61.4	0	241.44	17	17	17	11	13	16	11	13	16	11	13	16	1.2788	1.1248	57.018	44	0	1.8596	29.037	14	0	1.0951	60.253	16	0	1.0468	75.11	14	0	47	61.4	61.4
Q2FWZ9	Q2FWZ9	UDP-N-acetylmuramyl tripeptide synthetase, putative	>tr|Q2FWZ9|Q2FWZ9_STAA8 UDP-N-acetylmuramyl tripeptide synthetase, putative OS=Staphylococcus aureus (strain NCTC 8325) GN=SAOUHSC_02107 PE=4 SV=1	-0.665117	0.495104	0.164014	-0.574605	-1.58476		5	5	5	14.2	14.2	14.2	0	34.886	5	5	5	4	3	3	4	3	3	4	3	3	1.0229	0.92492	48.669	7	0	1.4874	13.75	3	0	0.68106	56.335	2	0	0.3152	69.43	3	1	11.4	8.9	9.2
Q2FX00	Q2FX00	Putative uncharacterized protein	>tr|Q2FX00|Q2FX00_STAA8 Putative uncharacterized protein OS=Staphylococcus aureus (strain NCTC 8325) GN=SAOUHSC_02106 PE=4 SV=1	-0.249868	0.188871	-1.15631	0.410992	-0.00429115		6	6	6	23	23	23	0	11.654	6	6	6	4	5	5	4	5	5	4	5	5	0.94154	0.98698	32.333	6	0	0.64131	70.8	5	3	1.3388	117.86	6	5	0.91999	10.586	3	0	18.5	17.7	23
Q2FX05	Q2FX05	Methionine aminopeptidase	>tr|Q2FX05|Q2FX05_STAA8 Methionine aminopeptidase OS=Staphylococcus aureus (strain NCTC 8325) GN=map PE=3 SV=1	0.110142	0.526391	-0.0440029	0.21661	0.15782		11	11	11	37.7	37.7	37.7	0	123.9	11	11	11	9	9	8	9	9	8	9	9	8	1.161	1.0979	31.229	18	0	1.4735	35.83	7	0	1.2133	23.388	6	0	1.0834	17.32	5	0	35.7	31.3	28.6
Q2FX11	Q2FX11	Putative uncharacterized protein	>tr|Q2FX11|Q2FX11_STAA8 Putative uncharacterized protein OS=Staphylococcus aureus (strain NCTC 8325) GN=SAOUHSC_02096 PE=4 SV=1	-0.213913	0.219831	0.0832474	NaN	-0.511074		2	2	2	18.7	18.7	18.7	0	5.5407	2	2	2	2	2	2	2	2	2	2	2	2	1.0731	0.92239	19.479	4	0	1.5024	6.9646	2	0	NaN	NaN	1	0	0.67738	2.9861	2	1	18.7	18.7	18.7
Q2FX12	Q2FX12	Low molecular weight protein-tyrosine-phosphatase PtpA	>sp|Q2FX12|PTPA_STAA8 Low molecular weight protein-tyrosine-phosphatase PtpA OS=Staphylococcus aureus (strain NCTC 8325) GN=ptpA PE=3 SV=1	0.0671053	0.199954	0.258579	0.0953169	-0.15258		2	2	2	16.9	16.9	16.9	0	50.387	2	2	2	2	2	2	2	2	2	2	2	2	1.1194	1.0322	15.223	6	0	1.7305	11.497	2	0	1.1194	14.222	2	0	0.87554	0.78129	2	0	16.9	16.9	16.9
Q2FX14	Q2FX14	Aminopeptidase PepS, putative	>tr|Q2FX14|Q2FX14_STAA8 Aminopeptidase PepS, putative OS=Staphylococcus aureus (strain NCTC 8325) GN=SAOUHSC_02092 PE=4 SV=1	-0.162898	0.382306	-0.164464	0.114234	-0.438464		24	24	24	58.6	58.6	58.6	0	214.25	24	24	24	22	21	23	22	21	23	22	21	23	1.1402	0.95679	36.83	46	0	1.2491	33.021	17	0	1.144	35.896	14	0	0.72584	39.923	15	0	57.7	52.2	58.6
Q2FX15	Q2FX15	Putative uncharacterized protein	>tr|Q2FX15|Q2FX15_STAA8 Putative uncharacterized protein OS=Staphylococcus aureus (strain NCTC 8325) GN=SAOUHSC_02091 PE=4 SV=1	-0.0631427	0.0482799	0.746571	-0.261708	-0.674291		3	3	3	26.7	26.7	26.7	0	17.493	3	3	3	3	2	2	3	2	2	3	2	2	0.82494	0.8341	54.062	7	5	2.4417	35.733	2	1	0.82494	52.315	3	3	0.59473	4.8689	2	1	26.7	19.9	19.9
Q2FX19	Q2FX19	Conserved hypothetical phage protein	>tr|Q2FX19|Q2FX19_STAA8 Conserved hypothetical phage protein OS=Staphylococcus aureus (strain NCTC 8325) GN=SAOUHSC_02087 PE=4 SV=1	0.0276122	0.468594	0.0720372	0.00647761	0.00432164		5	5	5	19.6	19.6	19.6	0	7.8207	5	5	5	2	5	5	2	5	5	2	5	5	1.0696	1.003	20.868	8	0	1.5261	41.991	2	0	1.0253	51.45	6	4	0.94534	12.737	4	0	9.3	19.6	19.6
Q2FX22	Q2FX22	Phage repressor protein, putative	>tr|Q2FX22|Q2FX22_STAA8 Phage repressor protein, putative OS=Staphylococcus aureus (strain NCTC 8325) GN=SAOUHSC_02084 PE=4 SV=1	-0.0639857	0.229426	-0.122963	-0.200979	0.131985		7	7	5	30.1	30.1	26.4	0	8.9891	7	7	5	4	4	4	4	4	4	3	3	3	1.0669	1.0958	52.453	11	10	1.2873	58.124	2	1	0.8567	53.844	6	6	1.0669	56.398	3	3	21.3	22.2	20.5
Q2FX90	Q2FX90	Putative uncharacterized protein	>tr|Q2FX90|Q2FX90_STAA8 Putative uncharacterized protein OS=Staphylococcus aureus (strain NCTC 8325) GN=SAOUHSC_01987 PE=4 SV=1	-0.397658	0.437376	0.286999	-0.738313	-0.741662		10	10	10	58.8	58.8	58.8	0	115.9	10	10	10	10	8	7	10	8	7	10	8	7	1.053	1.0298	43.358	9	0	1.7525	16.416	4	0	0.59189	47.656	3	0	0.56263	104.23	10	8	58.8	48.7	43.2
Q2FX94	Q2FX94	Fumarate hydratase class II	>tr|Q2FX94|Q2FX94_STAA8 Fumarate hydratase class II OS=Staphylococcus aureus (strain NCTC 8325) GN=fumC PE=3 SV=1	0.0623904	1.19173	0.0342158	0.0918014	0.0611541		29	29	29	63.1	63.1	63.1	0	323.31	29	29	29	27	26	28	27	26	28	27	26	28	1.1831	1.0494	31.448	92	0	1.5303	28.212	30	0	1.1607	24.032	27	0	0.98711	39.056	35	0	61.6	60.3	63.1
Q2FX95	Q2FX95	Ribosomal large subunit pseudouridine synthase, RluD subfamily, putative	>tr|Q2FX95|Q2FX95_STAA8 Ribosomal large subunit pseudouridine synthase, RluD subfamily, putative OS=Staphylococcus aureus (strain NCTC 8325) GN=SAOUHSC_01982 PE=4 SV=1	0.117203	0.116674	-0.184916	NaN	0.419323		6	6	6	25.6	25.6	25.6	0	7.0743	6	6	6	4	2	4	4	2	4	4	2	4	1.1333	0.99378	53.45	8	6	1.1852	40.614	4	4	NaN	NaN	1	0	1.269	86.208	3	2	16.8	8.8	15.8
Q2FXA0	Q2FXA0	UPF0342 protein SAOUHSC_01977	>sp|Q2FXA0|Y1977_STAA8 UPF0342 protein SAOUHSC_01977 OS=Staphylococcus aureus (strain NCTC 8325) GN=SAOUHSC_01977 PE=3 SV=1	0.100874	0.118514	0.591009	-0.412846	0.124461		10	10	10	85.1	85.1	85.1	0	189.38	10	10	10	9	8	9	9	8	9	9	8	9	1.1658	1.2232	41.861	29	0	2.2165	50.376	10	0	0.77441	31.084	8	0	1.051	25.519	11	0	85.1	85.1	85.1
Q2FXA3	Q2FXA3	Uroporphyrinogen decarboxylase	>sp|Q2FXA3|DCUP_STAA8 Uroporphyrinogen decarboxylase OS=Staphylococcus aureus (strain NCTC 8325) GN=hemE PE=3 SV=1	-0.00231792	0.0063536	-0.193387	-0.0108028	0.197236		6	6	6	22.3	22.3	22.3	0	52.82	6	6	6	5	5	5	5	5	5	5	5	5	1.169	1.0342	22.514	10	0	1.2708	23.575	3	0	0.97316	19.812	3	0	1.0525	29.123	4	0	18.6	16.5	18.6
Q2FXA4	Q2FXA4	Ferrochelatase	>tr|Q2FXA4|Q2FXA4_STAA8 Ferrochelatase OS=Staphylococcus aureus (strain NCTC 8325) GN=hemH PE=3 SV=1	-0.0246576	0.0545	0.248292	-0.25484	-0.0674248		7	7	7	32.6	32.6	32.6	0	46.776	7	7	7	4	7	4	4	7	4	4	7	4	0.90619	0.98128	26.254	10	0	1.679	13.18	4	2	0.88025	31.505	5	0	0.90494	5.2796	3	0	21.8	32.6	16.6
Q2FXD0;Q2G0X6	Q2FXD0;Q2G0X6	Type I restriction-modification system, M subunit	>tr|Q2FXD0|Q2FXD0_STAA8 Type I restriction-modification system, M subunit OS=Staphylococcus aureus (strain NCTC 8325) GN=SAOUHSC_01933 PE=4 SV=1;>tr|Q2G0X6|Q2G0X6_STAA8 Type I restriction-modification system, M subunit OS=Staphylococcus aureus (strain NCTC	-0.0146884	0.0478058	-0.092294	0.182057	-0.133828		16	16	16	38.9	38.9	38.9	0	272.99	NaN	NaN	NaN	10	12	14	10	12	14	10	12	14	1.0905	0.97692	27.835	35	0	1.3683	26.899	9	0	1.1778	22.546	12	0	0.87639	28.529	14	0	26.8	31.1	35.8
Q2FXE2	Q2FXE2	Putative uncharacterized protein	>tr|Q2FXE2|Q2FXE2_STAA8 Putative uncharacterized protein OS=Staphylococcus aureus (strain NCTC 8325) GN=SAOUHSC_01907 PE=4 SV=1	0.00561904	0.0700421	-0.0252211	0.0581087	-0.0160305		10	10	10	41.5	41.5	41.5	0	36.045	10	10	10	9	7	9	9	7	9	9	7	9	1.1321	0.9882	20.079	23	0	1.4208	21.289	7	0	1.1219	13.3	7	0	0.95122	24.314	9	0	38.6	26.4	41.5
Q2FXE8	Q2FXE8	Transaldolase	>tr|Q2FXE8|Q2FXE8_STAA8 Transaldolase OS=Staphylococcus aureus (strain NCTC 8325) GN=SAOUHSC_01901 PE=3 SV=1	-0.18267	0.759761	-0.0137128	-0.310468	-0.223829		20	20	20	84.4	84.4	84.4	0	323.31	20	20	20	18	19	20	18	19	20	18	19	20	0.93546	0.88946	30.303	59	0	1.5165	30.619	20	0	0.85021	21.879	21	0	0.82528	34.03	18	0	81.4	84.4	84.4
Q2FXG2	Q2FXG2	6,7-dimethyl-8-ribityllumazine synthase	>sp|Q2FXG2|RISB_STAA8 6,7-dimethyl-8-ribityllumazine synthase OS=Staphylococcus aureus (strain NCTC 8325) GN=ribH PE=3 SV=1	0.169264	0.317018	0.329181	0.00934718	NaN		5	5	5	48.7	48.7	48.7	0	94.282	5	5	5	5	4	1	5	4	1	5	4	1	1.4203	1.2248	29.112	11	0	1.8628	29.7	5	0	1.0265	18.168	5	0	NaN	NaN	1	0	48.7	29.9	4.5
Q2FXG3	Q2FXG3	Putative uncharacterized protein	>tr|Q2FXG3|Q2FXG3_STAA8 Putative uncharacterized protein OS=Staphylococcus aureus (strain NCTC 8325) GN=SAOUHSC_01884 PE=4 SV=1	-0.0437338	0.0675674	0.362778	-0.140253	-0.353727		13	13	13	41.4	41.4	41.4	0	100.55	13	13	13	8	8	11	8	8	11	8	8	11	1.0333	0.98094	40.64	14	0	1.8285	34.467	5	0	0.91588	27.759	5	0	0.74806	44.212	4	0	29.1	23.7	41.1
Q2FXH2	Q2FXH2	Leucine--tRNA ligase	>sp|Q2FXH2|SYL_STAA8 Leucine--tRNA ligase OS=Staphylococcus aureus (strain NCTC 8325) GN=leuS PE=3 SV=1	-0.0595861	0.281032	-0.162299	0.0928839	-0.109343		34	34	34	49.3	49.3	49.3	0	323.31	34	34	34	29	31	31	29	31	31	29	31	31	1.1168	0.99147	50.569	68	0	1.3027	20.081	19	0	1.1407	55.548	23	0	0.88978	59.898	26	0	43.5	47.8	41
Q2FXH3	Q2FXH3	Putative uncharacterized protein	>tr|Q2FXH3|Q2FXH3_STAA8 Putative uncharacterized protein OS=Staphylococcus aureus (strain NCTC 8325) GN=SAOUHSC_01874 PE=4 SV=1	0.392157	1.7072	NaN	0.404249	0.380064		2	2	2	34	34	34	0	4.7404	2	2	2	1	2	2	1	2	2	1	2	2	1.162	1.1093	17.405	3	0	NaN	NaN	1	0	1.3357	24.962	2	1	1.2568	6.9658	2	1	7.8	34	34
Q2FXH8	Q2FXH8	Putative uncharacterized protein	>tr|Q2FXH8|Q2FXH8_STAA8 Putative uncharacterized protein OS=Staphylococcus aureus (strain NCTC 8325) GN=SAOUHSC_01869 PE=4 SV=1	-0.107043	0.0990241	0.595408	-0.620135	-0.296403		5	5	5	43.6	43.6	43.6	0	20.428	5	5	5	3	4	5	3	4	5	3	4	5	0.79279	0.81428	76.22	14	12	2.0595	47.142	3	2	0.6698	80.189	5	5	0.79279	64.011	6	5	20.7	32.1	43.6
Q2FXH9	Q2FXH9	Putative dipeptidase SAOUHSC_01868	>sp|Q2FXH9|PEPVL_STAA8 Putative dipeptidase SAOUHSC_01868 OS=Staphylococcus aureus (strain NCTC 8325) GN=SAOUHSC_01868 PE=3 SV=1	-0.0204891	0.528276	-0.0275426	-0.0415507	0.00762616		33	33	33	64	64	64	0	323.31	33	33	33	30	29	29	30	29	29	30	29	29	1.0819	0.98286	31.924	97	0	1.4359	32.85	34	0	0.98153	30.059	31	0	0.94735	33.275	32	0	63.5	59.5	62.5
Q2FXI0	Q2FXI0	D-alanine aminotransferase	>tr|Q2FXI0|Q2FXI0_STAA8 D-alanine aminotransferase OS=Staphylococcus aureus (strain NCTC 8325) GN=SAOUHSC_01867 PE=3 SV=1	-0.123778	0.554227	0.044464	-0.211281	-0.204516		21	21	21	83	83	83	0	323.31	21	21	21	18	19	19	18	19	19	18	19	19	1.0788	0.97109	30.776	60	0	1.5307	24.113	23	0	0.92616	26.206	18	0	0.80434	37.395	19	0	77.7	74.1	76.2
Q2FXI5	Q2FXI5	Putative uncharacterized protein	>tr|Q2FXI5|Q2FXI5_STAA8 Putative uncharacterized protein OS=Staphylococcus aureus (strain NCTC 8325) GN=SAOUHSC_01861 PE=4 SV=1	0.0293277	0.0969281	0.227125	-0.109701	-0.0294408		14	14	14	53.1	53.1	53.1	0	83.31	14	14	14	12	12	13	12	12	13	12	12	13	0.99104	0.96378	36.518	26	0	1.7348	24.65	6	0	0.96849	23.132	10	0	0.95678	49.529	10	0	47.2	47.2	50.3
Q2FXI6	Q2FXI6	Putative uncharacterized protein	>tr|Q2FXI6|Q2FXI6_STAA8 Putative uncharacterized protein OS=Staphylococcus aureus (strain NCTC 8325) GN=SAOUHSC_01860 PE=4 SV=1	-0.591469	1.11086	-0.310468	-0.551374	-0.912564		5	5	5	60.2	60.2	60.2	0	40.63	5	5	5	3	4	4	3	4	4	3	4	4	0.97286	0.80638	45.197	6	0	1.2022	180.28	4	2	0.7167	167.65	4	2	0.51124	155.18	4	2	34	46.6	47.6
Q2FXI8	Q2FXI8	Putative uncharacterized protein	>tr|Q2FXI8|Q2FXI8_STAA8 Putative uncharacterized protein OS=Staphylococcus aureus (strain NCTC 8325) GN=SAOUHSC_01858 PE=4 SV=1	-0.0754697	0.319144	-0.236707	-0.0540328	0.0643311		10	10	10	52	52	52	0	78.1	10	10	10	9	10	7	9	10	7	9	10	7	1.0171	0.96324	23.479	18	0	1.2391	25.956	6	0	0.96952	18.281	6	0	1.0132	28.629	6	0	46.5	52	39.9
Q2FXI9	Q2FXI9	Putative uncharacterized protein	>tr|Q2FXI9|Q2FXI9_STAA8 Putative uncharacterized protein OS=Staphylococcus aureus (strain NCTC 8325) GN=SAOUHSC_01857 PE=4 SV=1	-0.0393808	0.075705	-0.119808	-0.288523	0.290188		9	9	9	11	11	11	0	18.369	9	9	9	5	5	5	5	5	5	5	5	5	1.1838	0.92031	21.995	7	0	1.2526	4.4681	3	0	0.82097	38.048	4	2	1.135	13.88	3	1	6.4	5.7	6.7
Q2FXJ0	Q2FXJ0	UDP-N-acetylmuramate--L-alanine ligase	>sp|Q2FXJ0|MURC_STAA8 UDP-N-acetylmuramate--L-alanine ligase OS=Staphylococcus aureus (strain NCTC 8325) GN=murC PE=3 SV=1	-0.0461011	1.49783	-0.0578571	-0.0506668	-0.0297795		14	14	14	40.5	40.5	40.5	0	117.85	14	14	14	12	10	11	12	10	11	12	10	11	1.0968	0.96743	22.527	26	0	1.3815	13.278	9	0	1.0134	17.116	10	0	0.97495	36.634	7	0	32.7	27.9	31.6
Q2FXJ5	Q2FXJ5	Tyrosine--tRNA ligase	>sp|Q2FXJ5|SYY_STAA8 Tyrosine--tRNA ligase OS=Staphylococcus aureus (strain NCTC 8325) GN=tyrS PE=3 SV=1	-0.0382426	0.111194	-0.110402	-0.194245	0.189919		16	16	16	39	39	39	0	151.88	16	16	16	13	16	14	13	16	14	13	16	14	1.1397	0.94175	32.429	30	0	1.3436	16.771	10	0	0.89561	40.697	11	0	1.0789	37.181	9	0	37.1	39	36.4
Q2FXJ6	Q2FXJ6	Putative uncharacterized protein	>tr|Q2FXJ6|Q2FXJ6_STAA8 Putative uncharacterized protein OS=Staphylococcus aureus (strain NCTC 8325) GN=SAOUHSC_01838 PE=4 SV=1	-0.050446	0.104992	0.248778	-0.0914176	-0.308698		15	15	15	51.7	51.7	51.7	0	77.922	15	15	15	11	13	11	11	13	11	11	13	11	1.0739	0.99251	51.487	31	0	1.6013	23.406	10	0	0.95709	39.527	12	0	0.78368	80.484	9	0	30.9	43.6	37.3
Q2FXJ7	Q2FXJ7	1-acyl-sn-glycerol-3-phosphate acyltransferases domain protein	>tr|Q2FXJ7|Q2FXJ7_STAA8 1-acyl-sn-glycerol-3-phosphate acyltransferases domain protein OS=Staphylococcus aureus (strain NCTC 8325) GN=SAOUHSC_01837 PE=4 SV=1	0.294115	2.11171	0.265917	0.27035	0.346078		4	4	4	19.5	19.5	19.5	0	6.532	4	4	4	4	4	3	4	4	3	4	4	3	1.0576	0.92627	14.458	3	0	1.6747	89.038	4	3	1.2243	53.03	4	3	1.1898	66.419	4	3	19.5	19.5	14.6
Q2FXJ8	Q2FXJ8	Putative uncharacterized protein	>tr|Q2FXJ8|Q2FXJ8_STAA8 Putative uncharacterized protein OS=Staphylococcus aureus (strain NCTC 8325) GN=SAOUHSC_01836 PE=4 SV=1	0.0821085	0.105767	0.037312	-0.348078	0.557091		5	5	5	12.3	12.3	12.3	0	29.017	5	5	5	4	4	3	4	4	3	4	4	3	1.3557	1.0847	31.003	3	0	1.4445	99.841	5	4	0.78785	81.801	4	3	1.4264	95.735	4	3	9.8	10.9	8.8
Q2FXK2	Q2FXK2	Putative uncharacterized protein	>tr|Q2FXK2|Q2FXK2_STAA8 Putative uncharacterized protein OS=Staphylococcus aureus (strain NCTC 8325) GN=SAOUHSC_01832 PE=3 SV=1	-0.0915928	0.105434	0.494364	-0.412001	-0.357141		10	10	10	29.5	29.5	29.5	0	24.222	10	10	10	9	8	8	9	8	8	9	8	8	1.468	1.2233	39.343	8	0	1.9625	14.441	4	0	0.7422	48.713	3	0	0.73669	68.439	9	8	25.4	22.8	24.4
Q2FXK6	Q2FXK6	30S ribosomal protein S4	>sp|Q2FXK6|RS4_STAA8 30S ribosomal protein S4 OS=Staphylococcus aureus (strain NCTC 8325) GN=rpsD PE=3 SV=1	-0.167669	0.116404	0.812375	-0.675489	-0.639894		17	17	17	62	62	62	0	64.266	17	17	17	11	16	14	11	16	14	11	16	14	0.81582	0.81515	65.638	34	0	2.5808	24.851	10	0	0.63961	37.144	12	0	0.61653	76.832	12	0	43.5	62	51
Q2FXK7	Q2FXK7	GAF domain protein	>tr|Q2FXK7|Q2FXK7_STAA8 GAF domain protein OS=Staphylococcus aureus (strain NCTC 8325) GN=SAOUHSC_01828 PE=4 SV=1	0.104833	0.295598	-0.00209343	0.21176	NaN		4	4	4	21.4	21.4	21.4	0	15.054	4	4	4	3	2	3	3	2	3	3	2	3	1.2718	1.1958	15.515	3	0	1.4597	38.402	3	2	1.1224	4.5319	2	1	NaN	NaN	1	0	16.2	8.4	13.6
Q2FXK8	Q2FXK8	Septation ring formation regulator EzrA	>sp|Q2FXK8|EZRA_STAA8 Septation ring formation regulator EzrA OS=Staphylococcus aureus (strain NCTC 8325) GN=ezrA PE=3 SV=1	0.0972771	0.955212	0.0820213	0.0450235	0.164786		22	22	22	52.5	52.5	52.5	0	120.85	22	22	22	18	17	18	18	17	18	18	17	18	1.164	1.0564	25.919	38	0	1.5475	17.656	12	0	1.0937	21.088	12	0	1.0564	35.485	14	0	47.5	39	44
Q2FXL1	Q2FXL1	Probable tRNA sulfurtransferase	>sp|Q2FXL1|THII_STAA8 Probable tRNA sulfurtransferase OS=Staphylococcus aureus (strain NCTC 8325) GN=thiI PE=3 SV=1	0.406037	0.967432	0.206268	0.323082	0.688762		6	6	6	17	17	17	0	19.34	6	6	6	3	4	4	3	4	4	3	4	4	1.4606	1.386	44.736	8	7	1.5634	75.259	2	2	1.2247	36.557	3	2	1.5569	50.451	3	3	9.1	10.3	10.3
Q2FXL3	Q2FXL3	Probable thiol peroxidase	>tr|Q2FXL3|Q2FXL3_STAA8 Probable thiol peroxidase OS=Staphylococcus aureus (strain NCTC 8325) GN=tpx PE=1 SV=1	-0.104327	0.105437	0.523361	-0.617056	-0.219287		11	11	11	70.1	70.1	70.1	0	320.37	11	11	11	10	10	9	10	10	9	10	10	9	1.0677	1.0592	57.057	21	0	2.1828	29.637	8	0	0.67288	40.091	6	0	0.8266	56.701	7	0	70.1	69.5	66.5
Q2FXL5	Q2FXL5	Acetate kinase	>sp|Q2FXL5|ACKA_STAA8 Acetate kinase OS=Staphylococcus aureus (strain NCTC 8325) GN=ackA PE=3 SV=1	-0.0436534	0.275477	-0.00471089	-0.157785	0.0315363		28	28	28	76.8	76.8	76.8	0	323.31	28	28	28	23	22	28	23	22	28	23	22	28	1.0854	0.97696	27.946	74	0	1.5275	22.602	26	0	0.98242	25.876	24	0	0.96608	34.055	24	0	66.2	66.2	76.8
Q2FXL6	Q2FXL6	Putative universal stress protein SAOUHSC_01819	>sp|Q2FXL6|Y1819_STAA8 Putative universal stress protein SAOUHSC_01819 OS=Staphylococcus aureus (strain NCTC 8325) GN=SAOUHSC_01819 PE=3 SV=1	-0.0328205	0.0739395	0.218595	-0.288558	-0.0284987		19	19	19	88	88	88	0	323.31	19	19	19	15	15	18	15	15	18	15	15	18	1.0025	0.97861	69.675	65	0	1.7646	32.854	19	0	0.87614	34.497	22	0	0.94262	103.4	24	0	84.3	88	88
Q2FXL7	Q2FXL7	Alanine dehydrogenase 2	>sp|Q2FXL7|DHA2_STAA8 Alanine dehydrogenase 2 OS=Staphylococcus aureus (strain NCTC 8325) GN=ald2 PE=3 SV=1	-0.186919	0.188328	0.47892	-0.715818	-0.323859		22	22	22	71.2	71.2	71.2	0	221.72	22	22	22	20	20	20	20	20	20	20	20	20	0.82498	0.83078	56.378	36	0	1.9861	29.57	13	0	0.6219	44.028	12	0	0.76527	54.785	11	0	62.1	66.7	62.9
Q2FXL9	Q2FXL9	Uncharacterized peptidase SAOUHSC_01816	>sp|Q2FXL9|Y1816_STAA8 Uncharacterized peptidase SAOUHSC_01816 OS=Staphylococcus aureus (strain NCTC 8325) GN=SAOUHSC_01816 PE=3 SV=1	-0.169864	0.356028	-0.503364	0.104471	-0.110698		14	14	14	55.3	55.3	55.3	0	107.55	14	14	14	7	10	13	7	10	13	7	10	13	1.0733	1.0401	49.124	17	0	1.0733	35.422	5	0	1.1348	29.516	6	0	0.8776	73.482	6	0	22.5	33.3	50.4
Q2FXM0	Q2FXM0	UPF0173 metal-dependent hydrolase SAOUHSC_01815	>sp|Q2FXM0|Y1815_STAA8 UPF0173 metal-dependent hydrolase SAOUHSC_01815 OS=Staphylococcus aureus (strain NCTC 8325) GN=SAOUHSC_01815 PE=3 SV=1	-0.0831544	0.512127	-0.0207795	-0.205663	-0.0230205		9	9	9	56.8	56.8	56.8	0	264.1	9	9	9	8	9	9	8	9	9	8	9	9	1.03	0.95241	17.648	25	0	1.4097	17.646	8	0	0.89399	7.1977	8	0	0.96631	19.95	9	0	56.8	56.8	56.8
Q2FXM1	Q2FXM1	Putative uncharacterized protein	>tr|Q2FXM1|Q2FXM1_STAA8 Putative uncharacterized protein OS=Staphylococcus aureus (strain NCTC 8325) GN=SAOUHSC_01814 PE=4 SV=1	-0.0830978	0.108405	0.435735	-0.347307	-0.337722		12	12	12	77.4	77.4	77.4	0	159.91	12	12	12	11	11	12	11	11	12	11	11	12	1.0414	0.97684	48.077	37	0	2.0035	23.887	12	0	0.78658	35.44	13	0	0.77255	64.951	12	0	77.4	77.4	77.4
Q2FXM3	Q2FXM3	Putative uncharacterized protein	>tr|Q2FXM3|Q2FXM3_STAA8 Putative uncharacterized protein OS=Staphylococcus aureus (strain NCTC 8325) GN=SAOUHSC_01812 PE=4 SV=1	-0.376588	0.719159	0.0100636	-0.580526	-0.559303		5	5	5	22	22	22	0	19.787	5	5	5	4	3	5	4	3	5	4	3	5	1.2769	10.882	100.88	20	18	1.4661	95.09	6	5	0.69496	68.867	5	5	0.62374	126.12	9	8	18.8	12.8	22
Q2FXM5	Q2FXM5	NADP-dependent malic enzyme, putative	>tr|Q2FXM5|Q2FXM5_STAA8 NADP-dependent malic enzyme, putative OS=Staphylococcus aureus (strain NCTC 8325) GN=SAOUHSC_01810 PE=3 SV=1	0.0623609	0.428844	0.168642	0.0318186	-0.0133779		26	26	26	74.6	74.6	74.6	0	281.93	26	26	26	20	22	22	20	22	22	20	22	22	1.1082	1.0211	24.773	61	0	1.71	21.292	20	0	1.0717	20.429	20	0	0.94087	31.444	21	0	54.5	68.7	66.3
Q2FXM8	Q2FXM8	ATP-dependent 6-phosphofructokinase	>sp|Q2FXM8|PFKA_STAA8 ATP-dependent 6-phosphofructokinase OS=Staphylococcus aureus (strain NCTC 8325) GN=pfkA PE=1 SV=2	-0.0161696	0.135233	-0.0879787	-0.0151701	0.0546401		27	27	27	55	55	55	0	323.31	27	27	27	24	25	25	24	25	25	24	25	25	1.1244	0.9864	36.253	82	0	1.409	27.923	26	0	1.0559	31.66	29	0	1.0051	46.941	27	0	55	55	52.2
Q2FXM9	Q2FXM9	Pyruvate kinase	>sp|Q2FXM9|KPYK_STAA8 Pyruvate kinase OS=Staphylococcus aureus (strain NCTC 8325) GN=pyk PE=3 SV=1	0.00749184	0.112168	-0.0373251	0.024036	0.0357646		49	49	49	82.4	82.4	82.4	0	323.31	49	49	49	40	44	47	40	44	47	40	44	47	1.1785	1.0013	29.054	148	0	1.4897	23.491	49	0	1.0819	27.836	52	0	0.97239	35.279	47	0	79	81.5	82.4
Q2FXN3	Q2FXN3	Putative uncharacterized protein	>tr|Q2FXN3|Q2FXN3_STAA8 Putative uncharacterized protein OS=Staphylococcus aureus (strain NCTC 8325) GN=SAOUHSC_01802 PE=3 SV=1	-0.0981011	0.511292	-0.0333185	-0.242618	-0.0183665		8	8	8	37.5	37.5	37.5	0	62.766	8	8	8	6	8	7	6	8	7	6	8	7	0.97985	0.92888	24.247	18	0	1.4525	13.415	6	0	0.87743	19.364	7	0	0.91705	36.899	5	0	30.5	37.5	35.1
Q2FXN4	Q2FXN4	Isocitrate dehydrogenase [NADP]	>tr|Q2FXN4|Q2FXN4_STAA8 Isocitrate dehydrogenase [NADP] OS=Staphylococcus aureus (strain NCTC 8325) GN=SAOUHSC_01801 PE=3 SV=1	-0.0284997	0.159942	-0.0821635	-0.0989226	0.095587		17	17	17	50.5	50.5	50.5	0	318.03	17	17	17	11	15	14	11	15	14	11	15	14	1.0448	1.0387	14.284	38	0	1.451	16.517	12	0	1.0191	8.484	11	0	1.0177	14.064	15	0	30.1	45.5	37.4
Q2FXN6	Q2FXN6	Two-component response regulator, putative	>tr|Q2FXN6|Q2FXN6_STAA8 Two-component response regulator, putative OS=Staphylococcus aureus (strain NCTC 8325) GN=SAOUHSC_01800 PE=4 SV=1	0.107395	0.343448	0.0564447	0.329526	-0.0637861		6	6	6	28.2	28.2	28.2	0	60.507	6	6	6	6	4	4	6	4	4	6	4	4	1.3	1.0464	18.483	9	0	1.4096	16.768	4	0	1.2197	28.48	3	0	0.945	68.995	3	1	28.2	19.7	19.7
Q2FXN9	Q2FXN9	DNA polymerase	>tr|Q2FXN9|Q2FXN9_STAA8 DNA polymerase OS=Staphylococcus aureus (strain NCTC 8325) GN=SAOUHSC_01797 PE=3 SV=1	-0.070322	0.159162	0.234992	-0.184769	-0.261189		34	34	34	54.5	54.5	54.5	0	323.31	34	34	34	29	28	28	29	28	28	29	28	28	0.95139	0.92114	28.844	60	0	1.6949	19.945	18	0	0.91336	16.275	20	0	0.78736	33.293	22	0	46.8	44.7	43.2
Q2FXP2	Q2FXP2	Glyceraldehyde-3-phosphate dehydrogenase	>tr|Q2FXP2|Q2FXP2_STAA8 Glyceraldehyde-3-phosphate dehydrogenase OS=Staphylococcus aureus (strain NCTC 8325) GN=SAOUHSC_01794 PE=3 SV=1	0.37643	1.45499	0.238787	0.40621	0.484293		17	17	17	59.8	59.8	59.8	0	214.09	17	17	17	15	15	14	15	15	14	15	15	14	1.443	1.2652	39.61	43	0	1.7433	20.046	15	0	1.3936	50.625	12	0	1.3647	43.434	16	0	47.8	55.7	49.6
Q2FXP5	Q2FXP5	Putative uncharacterized protein	>tr|Q2FXP5|Q2FXP5_STAA8 Putative uncharacterized protein OS=Staphylococcus aureus (strain NCTC 8325) GN=SAOUHSC_01791 PE=4 SV=1	0.171184	0.195113	0.291132	-0.418755	0.641176		4	4	4	15.7	15.7	15.7	0	4.5135	4	4	4	2	2	2	2	2	2	2	2	2	1.4711	1.2581	45.742	6	4	1.6282	8.2543	2	2	0.77688	69.197	2	0	1.4711	0.47124	2	2	6.5	8.2	8.2
Q2FXP7	Q2FXP7	Threonine--tRNA ligase	>sp|Q2FXP7|SYT_STAA8 Threonine--tRNA ligase OS=Staphylococcus aureus (strain NCTC 8325) GN=thrS PE=3 SV=1	0.0848132	1.33127	0.0468402	0.1038	0.1038		45	45	45	64.8	64.8	64.8	0	323.31	45	45	45	36	39	43	36	39	43	36	39	43	1.1426	1.0673	40.155	128	0	1.5252	60.149	41	0	1.1154	21.15	44	0	1.0106	28.923	43	0	56.1	58.3	59.4
Q2FXP9	Q2FXP9	Translation initiation factor IF-3	>sp|Q2FXP9|IF3_STAA8 Translation initiation factor IF-3 OS=Staphylococcus aureus (strain NCTC 8325) GN=infC PE=3 SV=1	-0.00700251	0.00774448	-0.102001	0.518636	-0.437643		5	5	5	26.3	26.3	26.3	0	16.726	5	5	5	3	3	4	3	3	4	3	3	4	0.70737	0.73834	23.068	5	0	1.3336	30.637	4	2	1.4138	97.303	2	1	0.67593	56.428	5	3	18.9	14.3	20.6
Q2FXQ0	Q2FXQ0	50S ribosomal protein L35	>sp|Q2FXQ0|RL35_STAA8 50S ribosomal protein L35 OS=Staphylococcus aureus (strain NCTC 8325) GN=rpmI PE=3 SV=1	-0.289688	0.556037	-0.0689978	-0.681168	-0.118899		3	3	3	28.8	28.8	28.8	0	26.697	3	3	3	2	3	3	2	3	3	2	3	3	0.95292	0.9159	31.519	10	0	1.4005	8.045	4	0	0.66165	34.097	3	0	0.89249	27.369	3	0	25.8	28.8	28.8
Q2FXQ1	Q2FXQ1	50S ribosomal protein L20	>sp|Q2FXQ1|RL20_STAA8 50S ribosomal protein L20 OS=Staphylococcus aureus (strain NCTC 8325) GN=rplT PE=3 SV=1	-0.361652	0.555576	0.107956	-0.71902	-0.473891		6	6	6	31.4	31.4	31.4	0	8.8583	6	6	6	5	4	5	5	4	5	5	4	5	0.64665	0.64221	30.706	11	0	1.44	7.9339	3	0	0.62498	7.875	4	0	0.67545	34.743	4	0	23.7	22	22
Q2FXQ3	Q2FXQ3	Putative uncharacterized protein	>tr|Q2FXQ3|Q2FXQ3_STAA8 Putative uncharacterized protein OS=Staphylococcus aureus (strain NCTC 8325) GN=SAOUHSC_01782 PE=4 SV=1	-0.359568	0.482631	0.176323	-0.480599	-0.774429		11	11	11	82.7	82.7	82.7	0	86.953	11	11	11	8	10	9	8	10	9	8	10	9	0.78438	0.77071	39.412	18	0	1.6003	34.969	5	0	0.75666	27.037	7	0	0.56526	31.079	6	0	50.5	69.3	64.9
Q2FXQ4	Q2FXQ4	Putative uncharacterized protein	>tr|Q2FXQ4|Q2FXQ4_STAA8 Putative uncharacterized protein OS=Staphylococcus aureus (strain NCTC 8325) GN=SAOUHSC_01781 PE=4 SV=1	0.0403276	0.0505214	NaN	0.271784	-0.191129		2	2	2	5.8	5.8	5.8	0.008	1.218	2	2	2	1	2	2	1	2	2	1	2	2	1.1258	0.97541	12.297	3	0	NaN	NaN	1	0	1.2344	30.165	2	1	0.82733	41.131	2	1	3.2	5.8	5.8
Q2FXQ6	Q2FXQ6	Trigger factor	>sp|Q2FXQ6|TIG_STAA8 Trigger factor OS=Staphylococcus aureus (strain NCTC 8325) GN=tig PE=3 SV=1	-0.0523876	0.0524559	0.594549	-0.378982	-0.372729		19	19	19	40.6	40.6	40.6	0	194.7	19	19	19	18	15	17	18	15	17	18	15	17	1.0141	0.90267	41.114	41	0	2.2537	26.739	15	0	0.79031	22.388	13	0	0.70897	32.219	13	0	40.6	37.9	38.8
Q2FXQ7	Q2FXQ7	ATP-dependent Clp protease ATP-binding subunit ClpX	>sp|Q2FXQ7|CLPX_STAA8 ATP-dependent Clp protease ATP-binding subunit ClpX OS=Staphylococcus aureus (strain NCTC 8325) GN=clpX PE=3 SV=1	0.0374893	0.14404	0.213752	-0.0182497	-0.0830343		15	15	15	43.8	43.8	43.8	0	90.88	15	15	15	12	9	11	12	9	11	12	9	11	1.013	1.0009	29.379	21	0	1.6883	27.13	6	0	1.013	9.9038	7	0	0.92344	33.599	8	0	38.8	24.8	31.4
Q2FXR3	Q2FXR3	Delta-aminolevulinic acid dehydratase	>sp|Q2FXR3|HEM2_STAA8 Delta-aminolevulinic acid dehydratase OS=Staphylococcus aureus (strain NCTC 8325) GN=hemB PE=3 SV=1	0.131128	0.618308	0.215741	-0.0277485	0.205393		17	17	17	61.7	61.7	61.7	0	150.79	17	17	17	15	14	11	15	14	11	15	14	11	1.1835	1.1042	25.614	29	0	1.6914	31.414	12	0	1.0196	24.767	8	0	1.0664	16.533	9	0	53.4	54.6	45.4
Q2FXR4	Q2FXR4	Glutamate-1-semialdehyde 2,1-aminomutase 1	>sp|Q2FXR4|GSA1_STAA8 Glutamate-1-semialdehyde 2,1-aminomutase 1 OS=Staphylococcus aureus (strain NCTC 8325) GN=hemL1 PE=3 SV=1	0.0354366	0.786263	0.0281448	0.0113525	0.0668125		19	19	19	56.1	56.1	56.1	0	277.74	19	19	19	16	15	17	16	15	17	16	15	17	1.0699	1.0238	32.671	42	0	1.5472	22.946	15	0	1.054	36.777	14	0	1.0184	39.455	13	0	54	41.8	47.4
Q2FXR7	Q2FXR7	Putative uncharacterized protein	>tr|Q2FXR7|Q2FXR7_STAA8 Putative uncharacterized protein OS=Staphylococcus aureus (strain NCTC 8325) GN=SAOUHSC_01768 PE=4 SV=1	0.349449	0.780444	0.103531	0.658646	0.286171		6	6	6	39.2	39.2	39.2	0	9.243	6	6	6	3	2	5	3	2	5	3	2	5	1.5843	1.1748	58.246	9	7	1.5134	36.972	4	3	1.5843	86.045	3	3	1.1407	88.169	2	1	24.7	17.2	39.2
Q2FXR8	Q2FXR8	Valine--tRNA ligase	>sp|Q2FXR8|SYV_STAA8 Valine--tRNA ligase OS=Staphylococcus aureus (strain NCTC 8325) GN=valS PE=3 SV=1	-0.113892	0.777357	-0.217877	-0.0401705	-0.0836304		53	53	53	56.8	56.8	56.8	0	323.31	53	53	53	41	50	48	41	50	48	41	50	48	1.0757	0.92675	30.322	115	0	1.2919	17.405	34	0	1.0561	29.308	41	0	0.89716	39.135	40	0	51.1	56.5	55.8
Q2FXS8	Q2FXS8	50S ribosomal protein L21	>sp|Q2FXS8|RL21_STAA8 50S ribosomal protein L21 OS=Staphylococcus aureus (strain NCTC 8325) GN=rplU PE=3 SV=1	-0.151385	0.177981	0.407625	-0.618872	-0.242908		9	9	9	71.6	71.6	71.6	0	83.594	9	9	9	8	9	8	8	9	8	8	9	8	0.82726	0.84504	40.08	21	0	2.0131	20.871	7	0	0.6783	21.483	7	0	0.80099	32.198	7	0	71.6	71.6	71.6
Q2FXT0	Q2FXT0	50S ribosomal protein L27	>sp|Q2FXT0|RL27_STAA8 50S ribosomal protein L27 OS=Staphylococcus aureus (strain NCTC 8325) GN=rpmA PE=3 SV=1	0.0209794	0.0286995	0.454281	-0.337011	-0.0543324		8	8	8	56.4	56.4	56.4	0	20.032	8	8	8	8	7	8	8	7	8	8	7	8	0.98487	0.88664	37.035	18	0	2.0414	35.767	5	0	0.83038	25.602	7	0	0.93433	35.264	6	0	56.4	56.4	56.4
Q2FXT1	Q2FXT1	GTPase Obg	>sp|Q2FXT1|OBG_STAA8 GTPase Obg OS=Staphylococcus aureus (strain NCTC 8325) GN=obg PE=3 SV=1	0.112464	1.17123	0.169925	0.0646069	0.10286		16	16	16	49.8	49.8	49.8	0	71.437	16	16	16	15	13	12	15	13	12	15	13	12	1.1313	1.072	29.426	30	0	1.6215	24.941	11	0	1.0754	32.254	10	0	1.0408	28.911	9	0	48.6	39.1	37.4
Q2FXT6	Q2FXT6	Queuine tRNA-ribosyltransferase	>sp|Q2FXT6|TGT_STAA8 Queuine tRNA-ribosyltransferase OS=Staphylococcus aureus (strain NCTC 8325) GN=tgt PE=3 SV=1	0.00167033	0.00442355	-0.0646911	0.228357	-0.158655		9	9	9	30.6	30.6	30.6	0	51.621	9	9	9	7	6	7	7	6	7	7	6	7	1.2061	0.97083	28.093	11	0	1.3787	19.295	4	0	1.2061	5.9851	3	0	0.89502	42.091	4	0	25.6	20.3	26.1
Q2FXU0	Q2FXU0	Adenine phosphoribosyltransferase	>sp|Q2FXU0|APT_STAA8 Adenine phosphoribosyltransferase OS=Staphylococcus aureus (strain NCTC 8325) GN=apt PE=3 SV=1	0.00591067	0.0347463	-0.101412	0.0464211	0.0727232		6	6	6	58.7	58.7	58.7	0	152.55	6	6	6	6	6	6	6	6	6	6	6	6	1.0766	1.0007	20.316	22	0	1.3624	22.749	8	0	1.0691	14.408	7	0	1.0335	24.908	7	0	58.7	58.7	58.7
Q2FXU1	Q2FXU1	GTP pyrophosphokinase	>tr|Q2FXU1|Q2FXU1_STAA8 GTP pyrophosphokinase OS=Staphylococcus aureus (strain NCTC 8325) GN=SAOUHSC_01742 PE=3 SV=1	0.00867995	0.0669894	-0.0111663	0.0901759	-0.0529698		17	17	17	24.1	24.1	24.1	0	63.831	17	17	17	12	11	12	12	11	12	12	11	12	1.0426	0.98863	23.354	29	0	1.4228	26.553	9	0	1.0902	26.261	10	0	0.91343	14.885	10	0	18.2	17	16.6
Q2FXU2	Q2FXU2	D-aminoacyl-tRNA deacylase	>sp|Q2FXU2|DTD_STAA8 D-aminoacyl-tRNA deacylase OS=Staphylococcus aureus (strain NCTC 8325) GN=dtd PE=3 SV=1	0.155244	0.338021	-0.0443152	0.0150693	0.494979		2	2	2	10	10	10	0	70.923	2	2	2	2	2	2	2	2	2	2	2	2	1.3269	0.96975	68.072	7	7	1.3269	68.456	3	3	0.99676	78.458	2	2	1.3205	105.1	2	2	10	10	10
Q2FXU4	Q2FXU4	Histidine--tRNA ligase	>sp|Q2FXU4|SYH_STAA8 Histidine--tRNA ligase OS=Staphylococcus aureus (strain NCTC 8325) GN=hisS PE=3 SV=1	0.196387	1.11139	0.308943	0.115433	0.164786		10	10	10	30	30	30	0	40.475	10	10	10	8	8	7	8	8	7	8	8	7	1.1821	1.1244	30.89	19	0	1.7052	18.213	6	0	1.0853	36.396	6	0	1.0809	31.609	7	0	25.7	23.6	17.6
Q2FXU5	Q2FXU5	Aspartate--tRNA ligase	>sp|Q2FXU5|SYD_STAA8 Aspartate--tRNA ligase OS=Staphylococcus aureus (strain NCTC 8325) GN=aspS PE=3 SV=1	-0.00188945	0.0137049	-0.0871049	0.0506061	0.0308304		29	29	29	52.9	52.9	52.9	0	280.05	29	29	29	23	24	22	23	24	22	23	24	22	1.1387	0.96107	35.437	56	0	1.3506	32.375	18	0	1.0789	28.576	20	0	0.96432	45.552	18	0	48	44.4	45.6
Q2FXV4	Q2FXV4	Putative uncharacterized protein	>tr|Q2FXV4|Q2FXV4_STAA8 Putative uncharacterized protein OS=Staphylococcus aureus (strain NCTC 8325) GN=SAOUHSC_01727 PE=4 SV=1	-0.0696819	0.30745	-0.0719974	-0.213471	0.0764222		7	7	7	24.5	24.5	24.5	0	17.384	7	7	7	5	5	6	5	5	6	5	5	6	0.97415	0.91991	18.545	13	0	1.2912	24.252	4	0	0.83912	9.6527	5	0	1.0058	24.658	4	0	14.5	17.1	22.6
Q2FXV6	Q2FXV6	tRNA-specific 2-thiouridylase MnmA	>sp|Q2FXV6|MNMA_STAA8 tRNA-specific 2-thiouridylase MnmA OS=Staphylococcus aureus (strain NCTC 8325) GN=mnmA PE=3 SV=2	0.0854566	0.344953	-0.072938	0.0828389	0.246469		16	16	16	51.1	51.1	51.1	0	269.71	16	16	16	15	16	14	15	16	14	15	16	14	1.2027	1.0644	31.536	40	0	1.31	21.893	16	0	1.0982	44.74	12	0	1.1373	25.86	12	0	51.1	51.1	47.6
Q2FXV9	Q2FXV9	Alanine--tRNA ligase	>sp|Q2FXV9|SYA_STAA8 Alanine--tRNA ligase OS=Staphylococcus aureus (strain NCTC 8325) GN=alaS PE=3 SV=1	0.112711	0.673779	0.236584	0.0398403	0.0617071		22	22	22	32.3	32.3	32.3	0	177.69	22	22	22	18	14	14	18	14	14	18	14	14	1.0812	1.0467	40.32	29	0	1.6974	57.323	12	0	1.0812	18.984	9	0	0.97299	28.495	8	0	28.8	19.6	20.3
Q2FXW2	Q2FXW2	UPF0473 protein SAOUHSC_01719	>sp|Q2FXW2|Y1719_STAA8 UPF0473 protein SAOUHSC_01719 OS=Staphylococcus aureus (strain NCTC 8325) GN=SAOUHSC_01719 PE=3 SV=1	0.213626	0.102318	0.952334	-1.19304	0.881586		4	4	4	64.7	64.7	64.7	0	53.434	4	4	4	2	2	4	2	2	4	2	2	4	0.52433	0.48263	88.249	7	0	2.8352	17.98	2	1	0.45004	20.392	3	0	1.7348	100.4	3	0	42.2	53.9	64.7
Q2FXW7	Q2FXW7	Transcription elongation factor GreA	>sp|Q2FXW7|GREA_STAA8 Transcription elongation factor GreA OS=Staphylococcus aureus (strain NCTC 8325) GN=greA PE=3 SV=1	-0.0275384	0.0171414	0.87578	-0.861788	-0.0966069		8	8	8	75.9	75.9	75.9	0	88.541	8	8	8	7	5	7	7	5	7	7	5	7	1.0971	0.93523	71.188	11	0	2.24	42.403	4	0	0.54362	67.545	4	0	0.89406	63.425	3	0	57.6	51.9	75.9
Q2FXW9	Q2FXW9	Putative uncharacterized protein	>tr|Q2FXW9|Q2FXW9_STAA8 Putative uncharacterized protein OS=Staphylococcus aureus (strain NCTC 8325) GN=SAOUHSC_01711 PE=4 SV=1	-0.0852033	0.14355	0.316609	-0.2121	-0.36012		8	8	8	40.5	40.5	40.5	0	13.35	8	8	8	3	4	6	3	4	6	3	4	6	0.81182	0.84893	18.416	8	0	1.6978	21.756	2	1	0.83151	13.251	3	0	0.72772	17.897	4	0	16.4	18.4	32.6
Q2FXX0	Q2FXX0	Acetyl-CoA carboxylase, biotin carboxyl carrier protein, putative	>tr|Q2FXX0|Q2FXX0_STAA8 Acetyl-CoA carboxylase, biotin carboxyl carrier protein, putative OS=Staphylococcus aureus (strain NCTC 8325) GN=SAOUHSC_01710 PE=4 SV=1	0.0617419	0.12739	-0.25269	0.311736	0.12618		8	8	8	62.4	62.4	62.4	0	216.43	8	8	8	8	8	8	8	8	8	8	8	8	1.1971	1.0734	30.818	57	0	1.1865	22.336	19	0	1.2405	32.866	20	0	1.0556	22.567	18	0	62.4	62.4	62.4
Q2FXX1	Q2FXX1	Acetyl-CoA carboxylase, biotin carboxylase, putative	>tr|Q2FXX1|Q2FXX1_STAA8 Acetyl-CoA carboxylase, biotin carboxylase, putative OS=Staphylococcus aureus (strain NCTC 8325) GN=SAOUHSC_01709 PE=4 SV=1	-0.293044	0.643387	-0.0233724	-0.247902	-0.607858		13	13	13	34.2	34.2	34.2	0	156.36	13	13	13	8	10	9	8	10	9	8	10	9	1.0788	0.84212	38.342	13	0	1.4441	21.046	4	0	0.86604	42.855	5	0	0.62119	38.449	4	0	25.2	31.1	27.8
Q2FXX2	Q2FXX2	UPF0271 protein SAOUHSC_01708	>sp|Q2FXX2|Y1708_STAA8 UPF0271 protein SAOUHSC_01708 OS=Staphylococcus aureus (strain NCTC 8325) GN=SAOUHSC_01708 PE=3 SV=1	-0.061148	0.968903	-0.10341	-0.0495913	-0.0304424		7	7	7	29.2	29.2	29.2	0	53.989	7	7	7	7	5	5	7	5	5	7	5	5	0.98953	0.96621	38.769	13	0	1.3245	28.155	4	0	1.0327	18.212	5	0	0.9479	63.142	4	0	29.2	22.8	26
Q2FXX8	Q2FXX8	5-methylthioadenosine/S-adenosylhomocysteine nucleosidase	>sp|Q2FXX8|MTNN_STAA8 5-methylthioadenosine/S-adenosylhomocysteine nucleosidase OS=Staphylococcus aureus (strain NCTC 8325) GN=mtnN PE=3 SV=1	-0.311041	0.438843	-0.25269	0.11929	-0.799722		10	10	10	71.9	71.9	71.9	0	131.85	10	10	10	5	6	9	5	6	9	5	6	9	1.0432	0.84273	41.546	13	0	1.2576	23.388	4	0	1.1759	45.155	5	0	0.56479	30.079	4	0	25.4	41.2	68.9
Q2FXY2	Q2FXY2	Putative uncharacterized protein	>tr|Q2FXY2|Q2FXY2_STAA8 Putative uncharacterized protein OS=Staphylococcus aureus (strain NCTC 8325) GN=SAOUHSC_01698 PE=4 SV=1	-0.00759284	0.00693476	0.297485	NaN	-0.312671		3	3	3	36.5	36.5	36.5	0	12.273	3	3	3	2	2	3	2	2	3	2	2	3	1.0858	0.94598	58.682	10	9	1.7	61.254	4	4	NaN	NaN	1	1	0.78272	45.667	5	4	27.1	21.9	36.5
Q2FXY6	Q2FXY6	30S ribosomal protein S20	>sp|Q2FXY6|RS20_STAA8 30S ribosomal protein S20 OS=Staphylococcus aureus (strain NCTC 8325) GN=rpsT PE=3 SV=1	0.135003	0.355985	0.369606	-0.119181	0.154583		4	4	4	42.2	42.2	42.2	0	73.173	4	4	4	3	3	4	3	3	4	3	3	4	1.5226	1.1249	82.636	15	0	1.8551	43.405	4	0	0.98551	68.506	5	0	1.0686	119.03	6	0	42.2	42.2	42.2
Q2FXY7	Q2FXY7	Elongation factor 4	>sp|Q2FXY7|LEPA_STAA8 Elongation factor 4 OS=Staphylococcus aureus (strain NCTC 8325) GN=lepA PE=1 SV=1	0.173717	0.676751	0.238665	0.29678	-0.0142955		9	9	9	20.3	20.3	20.3	0	51.708	9	9	9	7	7	6	7	7	6	7	7	6	1.3168	1.1799	30.999	13	0	1.5452	10.427	5	0	1.2384	12.61	3	0	0.95391	49.542	5	0	15.7	16.3	12.7
Q2FXZ1	Q2FXZ1	Protein GrpE	>sp|Q2FXZ1|GRPE_STAA8 Protein GrpE OS=Staphylococcus aureus (strain NCTC 8325) GN=grpE PE=3 SV=1	-0.345275	0.385477	0.265077	-0.892044	-0.408857		8	8	8	55.8	55.8	55.8	0	43.714	8	8	8	6	5	6	6	5	6	6	5	6	0.71451	0.75794	42.123	8	0	1.7988	14.306	3	0	0.54414	13.095	4	2	0.70739	33.679	3	0	43.3	31.7	44.2
Q2FXZ2	Q2FXZ2	Chaperone protein DnaK	>sp|Q2FXZ2|DNAK_STAA8 Chaperone protein DnaK OS=Staphylococcus aureus (strain NCTC 8325) GN=dnaK PE=3 SV=1	-0.0725738	0.136571	0.2929	-0.276241	-0.23438		43	43	43	67	67	67	0	323.31	43	43	43	34	36	43	34	36	43	34	36	43	1.0224	0.96984	47.266	107	0	1.8172	26.061	33	0	0.87573	29.976	38	0	0.81424	64.508	36	0	57.9	63.3	67
Q2FXZ3	Q2FXZ3	Chaperone protein DnaJ	>sp|Q2FXZ3|DNAJ_STAA8 Chaperone protein DnaJ OS=Staphylococcus aureus (strain NCTC 8325) GN=dnaJ PE=3 SV=1	-0.204792	0.151305	0.673104	-0.350486	-0.936994		2	2	2	6.3	6.3	6.3	0	2.9535	2	2	2	2	2	2	2	2	2	2	2	2	0.82282	0.72162	53.995	9	0	2.1589	54.485	3	0	0.82282	27.841	3	0	0.51313	28.255	3	0	6.3	6.3	6.3
Q2FXZ4	Q2FXZ4	Ribosomal protein L11 methyltransferase	>sp|Q2FXZ4|PRMA_STAA8 Ribosomal protein L11 methyltransferase OS=Staphylococcus aureus (strain NCTC 8325) GN=prmA PE=3 SV=1	-0.10397	0.153376	0.306729	-0.108223	-0.510416		3	3	3	6.1	6.1	6.1	0	3.7677	3	3	3	2	1	3	2	1	3	2	1	3	1.0412	1.0508	13.748	6	0	1.6047	13.56	3	1	0.97269	6.9308	2	0	0.6591	41.933	4	2	6.1	3.8	6.1
Q2FXZ8	Q2FXZ8	Putative uncharacterized protein	>tr|Q2FXZ8|Q2FXZ8_STAA8 Putative uncharacterized protein OS=Staphylococcus aureus (strain NCTC 8325) GN=SAOUHSC_01677 PE=4 SV=1	0.27656	0.986947	0.195977	0.165172	0.468531		2	2	2	12.8	12.8	12.8	0	9.4423	2	2	2	2	2	2	2	2	2	2	2	2	1.2552	1.1449	34.098	12	0	1.46	21.859	4	0	1.1237	39.036	4	0	1.3401	44.237	4	0	12.8	12.8	12.8
Q2FXZ9	Q2FXZ9	UPF0365 protein SAOUHSC_01676	>sp|Q2FXZ9|Y1676_STAA8 UPF0365 protein SAOUHSC_01676 OS=Staphylococcus aureus (strain NCTC 8325) GN=SAOUHSC_01676 PE=3 SV=1	-0.194679	0.419989	0.0762854	-0.520087	-0.140237		19	19	19	63.5	63.5	63.5	0	257.04	19	19	19	16	14	15	16	14	15	16	14	15	0.90532	0.90854	46.481	40	0	1.5381	23.257	14	0	0.75427	37.203	11	0	0.85562	57.137	15	0	55.3	58.7	61.1
Q2FY00	Q2FY00	Putative uncharacterized protein	>tr|Q2FY00|Q2FY00_STAA8 Putative uncharacterized protein OS=Staphylococcus aureus (strain NCTC 8325) GN=SAOUHSC_01675 PE=4 SV=1	-0.545468	0.346098	-0.0785332	NaN	-1.0124		5	5	5	18.5	18.5	18.5	0	2.4902	5	5	5	4	0	2	4	0	2	4	0	2	1.2447	0.91144	40.294	5	3	1.2838	4.7021	3	1	NaN	NaN	0	0	0.46968	36.523	2	2	14.2	0	9.1
Q2FY08	Q2FY08	Glycine--tRNA ligase	>sp|Q2FY08|SYG_STAA8 Glycine--tRNA ligase OS=Staphylococcus aureus (strain NCTC 8325) GN=glyQS PE=3 SV=1	0.117509	1.35792	0.090447	0.168385	0.0936954		32	32	32	75.6	75.6	75.6	0	323.31	32	32	32	30	29	32	30	29	32	30	29	32	1.2187	1.0884	39.417	107	0	1.6255	32.165	35	0	1.2187	27.267	33	0	1.0368	52.544	39	0	69.8	65.2	75.6
Q2FY10	Q2FY10	Putative pyruvate, phosphate dikinase regulatory protein	>sp|Q2FY10|PDRP_STAA8 Putative pyruvate, phosphate dikinase regulatory protein OS=Staphylococcus aureus (strain NCTC 8325) GN=SAOUHSC_01664 PE=3 SV=1	0.267334	1.55721	0.178492	0.295018	0.328492		9	9	9	43.8	43.8	43.8	0	25.633	9	9	9	6	7	7	6	7	7	6	7	7	1.2757	1.204	33.775	13	0	1.5939	56.558	4	0	1.2492	12.752	3	0	1.1831	25.833	6	0	22.8	34.2	32
Q2FY14	Q2FY14	Putative GTP cyclohydrolase 1 type 2	>tr|Q2FY14|Q2FY14_STAA8 Putative GTP cyclohydrolase 1 type 2 OS=Staphylococcus aureus (strain NCTC 8325) GN=SAOUHSC_01660 PE=3 SV=1	-0.0249036	0.224325	-0.0620831	0.0549179	-0.0675457		8	8	8	26	26	26	0	33.349	8	8	8	5	8	6	5	8	6	5	8	6	1.0139	1.0175	24.258	16	0	1.3538	24.548	4	0	1.0201	18.104	6	0	0.91028	30.766	6	0	12.8	26	21
Q2FY15	Q2FY15	DEAD-box ATP-dependent RNA helicase CshB	>sp|Q2FY15|CSHB_STAA8 DEAD-box ATP-dependent RNA helicase CshB OS=Staphylococcus aureus (strain NCTC 8325) GN=cshB PE=3 SV=1	0.129683	0.602456	0.28558	0.0886844	0.0147838		8	8	8	20.3	20.3	20.3	0	16.751	8	8	8	7	6	6	7	6	6	7	6	6	1.2252	1.1263	28.687	12	0	1.4994	20.207	4	0	1.0322	14.698	3	0	0.96567	41.606	5	0	20.1	18.1	17.2
Q2FY16	Q2FY16	Probable endonuclease 4	>sp|Q2FY16|END4_STAA8 Probable endonuclease 4 OS=Staphylococcus aureus (strain NCTC 8325) GN=nfo PE=3 SV=1	0.264477	0.279425	0.94028	-0.209662	0.0628125		7	7	7	29.4	29.4	29.4	0	13.727	7	7	7	6	4	4	6	4	4	6	4	4	0.97291	1.0445	21.008	3	0	2.5322	17.498	5	4	0.85321	37.486	3	2	0.97291	90.88	5	4	26.7	12.8	16.6
Q2FY27	Q2FY27	Glucokinase, putative	>tr|Q2FY27|Q2FY27_STAA8 Glucokinase, putative OS=Staphylococcus aureus (strain NCTC 8325) GN=SAOUHSC_01646 PE=4 SV=1	0.140888	0.607376	0.0243196	0.0871912	0.311154		13	13	13	56.4	56.4	56.4	0	200.07	13	13	13	11	8	11	11	8	11	11	8	11	1.2211	1.0623	20.751	26	0	1.4874	21.828	10	0	1.1457	17.973	8	0	1.1497	24.384	8	0	47.3	31.1	44.2
Q2FY28	Q2FY28	Putative uncharacterized protein	>tr|Q2FY28|Q2FY28_STAA8 Putative uncharacterized protein OS=Staphylococcus aureus (strain NCTC 8325) GN=SAOUHSC_01645 PE=4 SV=1	0.239554	0.216766	1.03224	-0.169728	-0.143851		4	4	4	33	33	33	0	29.731	4	4	4	3	3	3	3	3	3	3	3	3	1.2183	0.9051	24.069	3	0	2.9789	89.333	4	2	0.92747	164.51	4	4	0.8677	126.62	5	4	24.8	32.1	32.1
Q2FY33	Q2FY33	Aminomethyltransferase	>sp|Q2FY33|GCST_STAA8 Aminomethyltransferase OS=Staphylococcus aureus (strain NCTC 8325) GN=gcvT PE=3 SV=1	-0.1365	0.541329	-0.290727	0.0368901	-0.155663		27	27	27	78.2	78.2	78.2	0	323.31	27	27	27	23	23	23	23	23	23	23	23	23	1.055	0.90998	42.488	68	0	1.2417	27.243	23	0	1.0773	30.812	22	0	0.8724	58.864	23	0	70	71.9	72.2
Q2FY34	Q2FY34	Probable glycine dehydrogenase (decarboxylating) subunit 1	>sp|Q2FY34|GCSPA_STAA8 Probable glycine dehydrogenase (decarboxylating) subunit 1 OS=Staphylococcus aureus (strain NCTC 8325) GN=gcvPA PE=3 SV=1	-0.200443	0.245854	0.37951	-0.390377	-0.590463		21	21	21	63.4	63.4	63.4	0	323.31	21	21	21	19	17	20	19	17	20	19	17	20	0.86507	0.86194	42.476	45	0	1.8662	22.093	16	0	0.80639	27.674	12	0	0.6464	45.815	17	0	59.6	50.2	59.6
Q2FY35	Q2FY35	Probable glycine dehydrogenase (decarboxylating) subunit 2	>sp|Q2FY35|GCSPB_STAA8 Probable glycine dehydrogenase (decarboxylating) subunit 2 OS=Staphylococcus aureus (strain NCTC 8325) GN=gcvPB PE=3 SV=1	-0.194738	1.13036	-0.0825911	-0.24513	-0.256494		30	30	30	74.5	74.5	74.5	0	323.31	30	30	30	22	28	27	22	28	27	22	28	27	1.0123	0.89138	35.778	80	0	1.4039	23.116	26	0	0.89198	26.174	28	0	0.80146	50.358	26	0	50.2	71	63.9
Q2FY36	Q2FY36	Putative uncharacterized protein	>tr|Q2FY36|Q2FY36_STAA8 Putative uncharacterized protein OS=Staphylococcus aureus (strain NCTC 8325) GN=SAOUHSC_01630 PE=4 SV=1	-0.0709771	0.145398	0.266637	-0.257356	-0.222212		9	9	9	39.1	39.1	39.1	0	29.011	9	9	9	7	4	6	7	4	6	7	4	6	0.93604	0.89781	20.817	13	0	1.4643	18.271	5	0	0.87504	10.3	5	0	0.83548	25.924	3	0	39.1	22.7	23.4
Q2FY37	Q2FY37	Octanoyltransferase LipM	>sp|Q2FY37|LIPM_STAA8 Octanoyltransferase LipM OS=Staphylococcus aureus (strain NCTC 8325) GN=lipM PE=3 SV=1	0.0836344	0.106965	0.572211	0.0143553	-0.335663		4	4	4	24.3	24.3	24.3	0	45.803	4	4	4	4	3	3	4	3	3	4	3	3	0.80267	0.79242	26.142	5	0	2.149	13.105	3	3	1.0326	42.167	2	0	0.74087	8.5753	3	0	24.3	15.6	21.4
Q2FY40	Q2FY40	Proline dipeptidase, putative	>tr|Q2FY40|Q2FY40_STAA8 Proline dipeptidase, putative OS=Staphylococcus aureus (strain NCTC 8325) GN=SAOUHSC_01626 PE=3 SV=1	-0.147723	1.17619	-0.144345	-0.0798897	-0.218934		19	19	19	62.6	62.6	62.6	0	161.41	19	19	19	15	17	17	15	17	17	15	17	17	1.0344	0.90411	46.15	38	0	1.3652	36.108	11	0	1.0068	38.82	13	0	0.83507	60.407	14	0	55	61.2	61.2
Q2FY41	Q2FY41	Elongation factor P	>sp|Q2FY41|EFP_STAA8 Elongation factor P OS=Staphylococcus aureus (strain NCTC 8325) GN=efp PE=3 SV=1	-0.0216799	0.0093442	1.41408	-0.835806	-0.643315		9	9	9	53.5	53.5	53.5	0	46.525	9	9	9	7	5	7	7	5	7	7	5	7	1.131	1.167	80.446	14	0	3.8933	31.015	6	0	0.58698	59.034	3	0	0.5991	39.642	5	0	37.3	34.6	49.2
Q2FY42	Q2FY42	Acetyl-CoA carboxylase, biotin carboxyl carrier protein	>tr|Q2FY42|Q2FY42_STAA8 Acetyl-CoA carboxylase, biotin carboxyl carrier protein OS=Staphylococcus aureus (strain NCTC 8325) GN=SAOUHSC_01624 PE=4 SV=1	0.0327747	0.163589	-0.0692097	0.167101	0.000432815		6	6	6	43.5	43.5	43.5	0	155.05	6	6	6	5	5	6	5	5	6	5	5	6	1.175	1.0338	15.58	28	0	1.4271	20.189	9	0	1.2224	16.834	9	0	0.98442	8.6442	10	0	42.2	42.2	43.5
Q2FY43	Q2FY43	Acetyl-CoA carboxylase, biotin carboxylase	>tr|Q2FY43|Q2FY43_STAA8 Acetyl-CoA carboxylase, biotin carboxylase OS=Staphylococcus aureus (strain NCTC 8325) GN=SAOUHSC_01623 PE=4 SV=1	0.0560457	1.48201	0.0352017	0.0655723	0.0673633		15	15	15	37	37	37	0	27.324	15	15	15	10	11	10	10	11	10	10	11	10	1.1069	1.0248	22.62	23	0	1.4057	25.321	7	0	1.0541	15.582	8	0	0.98084	27.989	8	0	27.1	28.8	23.9
Q2FY44	Q2FY44	Putative uncharacterized protein	>tr|Q2FY44|Q2FY44_STAA8 Putative uncharacterized protein OS=Staphylococcus aureus (strain NCTC 8325) GN=SAOUHSC_01622 PE=4 SV=1	0.0446356	0.0838307	0.371838	-0.236011	-0.00192009		2	2	2	25.8	25.8	25.8	0	49.737	2	2	2	1	2	2	1	2	2	1	2	2	0.98357	0.99801	22.386	6	0	1.8576	18.853	2	0	0.8708	4.5324	2	0	0.91952	17.974	2	0	15	25.8	25.8
Q2FY49	Q2FY49	Arginine repressor	>sp|Q2FY49|ARGR_STAA8 Arginine repressor OS=Staphylococcus aureus (strain NCTC 8325) GN=argR PE=3 SV=1	0.0110041	0.0469591	0.0487942	0.118758	-0.13454		6	6	6	48.7	48.7	48.7	0	44.803	6	6	6	6	6	6	6	6	6	6	6	6	1.0416	1.002	36.507	17	0	1.4984	40.49	5	0	1.1464	35.747	6	0	0.86152	38.579	6	0	48.7	48.7	48.7
Q2FY50	Q2FY50	DNA repair protein RecN	>tr|Q2FY50|Q2FY50_STAA8 DNA repair protein RecN OS=Staphylococcus aureus (strain NCTC 8325) GN=SAOUHSC_01615 PE=3 SV=1	0.0830961	0.650649	0.161307	0.0912597	-0.00327862		11	11	11	23.3	23.3	23.3	0	53.991	11	11	11	8	8	9	8	8	9	8	8	9	1.0907	1.0853	10.115	11	0	1.6253	5.7354	3	0	1.0907	7.904	3	0	0.96318	11.741	5	0	18.6	19.7	21.8
Q2FY51	Q2FY51	Dihydrolipoyl dehydrogenase	>tr|Q2FY51|Q2FY51_STAA8 Dihydrolipoyl dehydrogenase OS=Staphylococcus aureus (strain NCTC 8325) GN=SAOUHSC_01614 PE=4 SV=1	0.16698	0.297412	0.336169	-0.002209	NaN		3	3	3	10.8	10.8	10.8	0	4.8092	3	3	3	2	2	1	2	2	1	2	2	1	1.1266	1.0889	13.566	4	0	1.7289	22.387	2	1	1.0418	21.789	2	0	NaN	NaN	1	0	5.7	7	1.9
Q2FY52	Q2FY52	2-oxoisovalerate dehydrogenase, E1 component, alpha subunit, putative	>tr|Q2FY52|Q2FY52_STAA8 2-oxoisovalerate dehydrogenase, E1 component, alpha subunit, putative OS=Staphylococcus aureus (strain NCTC 8325) GN=SAOUHSC_01613 PE=4 SV=1	0.0575303	0.452269	0.0931545	0.0219061	NaN		3	3	3	12.4	12.4	12.4	0	18.669	3	3	3	3	2	2	3	2	2	3	2	2	1.2447	1.1962	24.391	5	0	1.4588	18.829	3	1	1.0109	33.544	2	0	NaN	NaN	1	0	12.4	7.6	9.4
Q2FY54	Q2FY54	2-oxoisovalerate dehydrogenase, E2 component, dihydrolipoamide acetyltransferase, putative	>tr|Q2FY54|Q2FY54_STAA8 2-oxoisovalerate dehydrogenase, E2 component, dihydrolipoamide acetyltransferase, putative OS=Staphylococcus aureus (strain NCTC 8325) GN=SAOUHSC_01611 PE=3 SV=1	0.0965683	0.43952	0.253021	0.0650208	-0.0283369		7	7	7	24.8	24.8	24.8	0	43.317	7	7	7	3	5	6	3	5	6	3	5	6	1.0585	1.014	17.185	12	0	1.5523	18.262	3	0	1.0437	19.332	5	0	0.92322	17.746	4	0	11.8	20	18.2
Q2FY55	Q2FY55	UPF0403 protein SAOUHSC_01610	>sp|Q2FY55|Y1610_STAA8 UPF0403 protein SAOUHSC_01610 OS=Staphylococcus aureus (strain NCTC 8325) GN=SAOUHSC_01610 PE=3 SV=1	-0.171231	0.181778	0.294665	-0.815555	0.00719549		5	5	5	38.6	38.6	38.6	0	10.544	5	5	5	4	2	2	4	2	2	4	2	2	1.2621	1.0167	24.808	5	0	1.781	63.385	4	2	0.576	79.121	2	1	0.96736	35.54	2	0	36.6	6.9	16.6
Q2FY59	Q2FY59	Peptidase T, putative	>tr|Q2FY59|Q2FY59_STAA8 Peptidase T, putative OS=Staphylococcus aureus (strain NCTC 8325) GN=SAOUHSC_01606 PE=4 SV=1	0.00082021	0.00262246	-0.124173	-0.0636654	0.190299		6	6	6	23.3	23.3	23.3	0	43.779	6	6	6	6	4	6	6	4	6	6	4	6	1.0823	1.0341	30.936	14	0	1.3088	26.961	5	0	0.96712	12.393	4	0	1.0736	47.539	5	0	23.3	15.1	23.3
Q2FY60	Q2FY60	6-phosphogluconate dehydrogenase, decarboxylating	>tr|Q2FY60|Q2FY60_STAA8 6-phosphogluconate dehydrogenase, decarboxylating OS=Staphylococcus aureus (strain NCTC 8325) GN=SAOUHSC_01605 PE=3 SV=1	0.0168266	0.0760037	0.160017	-0.0287931	-0.0807438		30	30	30	66.2	66.2	66.2	0	323.31	30	30	30	26	21	27	26	21	27	26	21	27	1.0751	1.0071	27.745	72	0	1.6331	21.118	24	0	1.025	22.852	23	0	0.90852	32.798	25	0	66	50.6	60.5
Q2FY64	Q2FY64	Alpha-amylase	>tr|Q2FY64|Q2FY64_STAA8 Alpha-amylase OS=Staphylococcus aureus (strain NCTC 8325) GN=SAOUHSC_01601 PE=3 SV=1	0.163921	1.15558	0.254473	0.130272	0.107018		11	11	11	26.4	26.4	26.4	0	73.805	11	11	11	9	9	9	9	9	9	9	9	9	1.1225	1.0921	19.778	17	0	1.8077	32.475	5	0	1.1489	7.6039	6	0	1.0374	14.636	6	0	22.2	20.6	22.6
Q2FY66	Q2FY66	Glucose-6-phosphate 1-dehydrogenase	>tr|Q2FY66|Q2FY66_STAA8 Glucose-6-phosphate 1-dehydrogenase OS=Staphylococcus aureus (strain NCTC 8325) GN=zwf PE=3 SV=1	-0.0428712	0.482168	0.0241777	-0.0782438	-0.0745474		26	26	26	48.6	48.6	48.6	0	197.15	26	26	26	22	18	24	22	18	24	22	18	24	1.048	0.96375	44.192	45	0	1.5383	34.311	13	0	0.93712	34.36	16	0	0.89827	59.32	16	0	41.7	41.5	46.6
Q2FY67	Q2FY67	Ribonuclease Z	>sp|Q2FY67|RNZ_STAA8 Ribonuclease Z OS=Staphylococcus aureus (strain NCTC 8325) GN=rnz PE=3 SV=1	0.184862	0.602455	0.374845	-0.0230205	0.202762		4	4	4	21.2	21.2	21.2	0	24.37	4	4	4	4	2	3	4	2	3	4	2	3	1.1426	1.137	22.858	6	0	1.7024	28.301	4	2	0.98807	18.681	2	0	1.0764	46.216	3	1	21.2	10.1	15.4
Q2FY68	Q2FY68	Pyrroline-5-carboxylate reductase	>tr|Q2FY68|Q2FY68_STAA8 Pyrroline-5-carboxylate reductase OS=Staphylococcus aureus (strain NCTC 8325) GN=proC PE=3 SV=1	0.0956359	0.751942	0.0583859	0.188401	0.040121		10	10	10	47.1	47.1	47.1	0	75.449	10	10	10	10	9	9	10	9	9	10	9	9	1.2149	1.0611	27.201	31	0	1.5387	31.623	11	0	1.2053	18.87	10	0	0.96895	30.69	10	0	47.1	47.1	47.1
Q2FY71	Q2FY71	Putative uncharacterized protein	>tr|Q2FY71|Q2FY71_STAA8 Putative uncharacterized protein OS=Staphylococcus aureus (strain NCTC 8325) GN=SAOUHSC_01594 PE=4 SV=1	-0.0187515	0.354845	-0.00497146	0.00633396	-0.0576169		8	8	8	36.1	36.1	36.1	0	35.585	8	8	8	5	5	6	5	5	6	5	5	6	1.0297	0.99656	44.763	9	0	1.4182	59.694	3	0	1.0297	55.105	3	0	0.91626	29.368	3	0	22.8	22.8	23.5
Q2FY72	Q2FY72	NUDIX domain protein	>tr|Q2FY72|Q2FY72_STAA8 NUDIX domain protein OS=Staphylococcus aureus (strain NCTC 8325) GN=SAOUHSC_01593 PE=3 SV=1	0.0914657	0.0413873	0.727703	-0.544771	NaN		2	2	2	16.7	16.7	16.7	0	5.2007	2	2	2	2	2	1	2	2	1	2	2	1	0.78568	0.7877	48.313	5	3	2.3129	3.5907	2	2	0.68473	19.654	2	1	NaN	NaN	1	0	16.7	16.7	10.6
Q2FY78	Q2FY78	Pseudouridine synthase	>tr|Q2FY78|Q2FY78_STAA8 Pseudouridine synthase OS=Staphylococcus aureus (strain NCTC 8325) GN=SAOUHSC_01587 PE=3 SV=1	0.0293909	0.0515268	0.39835	-0.166454	-0.143723		4	4	4	17.6	17.6	17.6	0	6.5701	4	4	4	2	4	3	2	4	3	2	4	3	0.9921	0.99115	23.961	6	0	1.6872	15.995	2	0	0.9135	1.158	3	1	0.86096	26.128	2	0	7.8	17.6	13.9
Q2FY79	Q2FY79	Transcriptional regulatory protein SrrA	>sp|Q2FY79|SRRA_STAA8 Transcriptional regulatory protein SrrA OS=Staphylococcus aureus (strain NCTC 8325) GN=srrA PE=3 SV=1	0.0101275	0.170248	0.0518593	-0.00905962	-0.0124172		12	12	12	47.7	47.7	47.7	0	85.56	12	12	12	9	10	11	9	10	11	9	10	11	1.0558	0.99595	35.747	26	0	1.4158	34.619	9	0	1.005	25.94	9	0	0.95072	45.203	8	0	47.3	47.3	43.6
Q2FY84	Q2FY84	Phi PVL ORF 30-like protein	>tr|Q2FY84|Q2FY84_STAA8 Phi PVL ORF 30-like protein OS=Staphylococcus aureus (strain NCTC 8325) GN=SAOUHSC_01580 PE=4 SV=1	-0.078177	0.396173	-0.00990192	-0.226071	0.00144204		5	5	5	26	26	26	0	45.056	5	5	5	5	4	4	5	4	4	5	4	4	0.99123	0.92147	22.485	10	0	1.4828	24.78	3	0	0.87766	16.989	3	0	0.97615	25.696	4	0	26	22.5	22.5
Q2FY89	Q2FY89	Helix-turn-helix domain protein	>tr|Q2FY89|Q2FY89_STAA8 Helix-turn-helix domain protein OS=Staphylococcus aureus (strain NCTC 8325) GN=SAOUHSC_01575 PE=4 SV=1	0.131046	0.348017	0.383165	0.111432	-0.101459		8	8	8	41.4	41.4	41.4	0	20.518	8	8	8	7	6	5	7	6	5	7	6	5	1.0244	1.0744	22.296	14	0	1.9267	13.222	4	0	1.0508	11.788	5	0	0.85756	17.274	5	0	35.4	30	30
Q2FYC8	Q2FYC8	Phage tail tape meausure protein, TP901 family, core region domain protein	>tr|Q2FYC8|Q2FYC8_STAA8 Phage tail tape meausure protein, TP901 family, core region domain protein OS=Staphylococcus aureus (strain NCTC 8325) GN=SAOUHSC_01525 PE=4 SV=1	-0.351038	0.918255	NaN	-0.418408	-0.283668		5	5	5	2.1	2.1	2.1	0.00095329	1.8598	5	5	5	1	4	3	1	4	3	1	4	3	1.1032	1.0801	40.689	5	0	NaN	NaN	1	0	0.76828	51.91	2	0	0.76968	52.633	2	0	0.3	1.6	1.2
Q2FYE8	Q2FYE8	Ferredoxin, putative	>tr|Q2FYE8|Q2FYE8_STAA8 Ferredoxin, putative OS=Staphylococcus aureus (strain NCTC 8325) GN=SAOUHSC_01504 PE=4 SV=1	0.113915	0.145817	-0.12312	NaN	0.35095		1	1	1	18.9	18.9	18.9	0.0045126	1.338	1	1	1	1	1	1	1	1	1	1	1	1	1.2133	1.1485	23.537	4	0	1.3226	23.255	2	0	NaN	NaN	0	0	1.2133	6.4307	2	0	18.9	18.9	18.9
Q2FYF1	Q2FYF1	Elastin-binding protein EbpS	>sp|Q2FYF1|EBPS_STAA8 Elastin-binding protein EbpS OS=Staphylococcus aureus (strain NCTC 8325) GN=ebpS PE=1 SV=1	-0.194564	0.845139	-0.0315331	-0.299915	-0.252243		10	10	10	34	34	34	0	270.86	10	10	10	8	7	7	8	7	7	8	7	7	0.8938	0.87277	20.644	30	0	1.3931	22.401	11	0	0.82485	17.026	9	0	0.78434	13.653	10	0	27.8	19.3	21
Q2FYF3	Q2FYF3	Putative uncharacterized protein	>tr|Q2FYF3|Q2FYF3_STAA8 Putative uncharacterized protein OS=Staphylococcus aureus (strain NCTC 8325) GN=SAOUHSC_01499 PE=4 SV=1	-0.192253	0.25901	0.238665	-0.124786	-0.690638		11	11	11	44.8	44.8	44.8	0	119.9	11	11	11	8	8	6	8	8	6	8	8	6	0.94523	0.92342	36.013	16	0	1.7075	12.975	5	0	0.93766	27.606	7	0	0.62318	38.476	4	0	37.5	33.8	27.4
Q2FYF5	Q2FYF5	(d)CMP kinase	>tr|Q2FYF5|Q2FYF5_STAA8 (d)CMP kinase OS=Staphylococcus aureus (strain NCTC 8325) GN=SAOUHSC_01496 PE=4 SV=1	-0.305306	0.791101	-0.321153	-0.540254	-0.0545121		8	8	8	45.9	45.9	45.9	0	49.415	8	8	8	5	6	8	5	6	8	5	6	8	0.89067	0.80043	31.267	11	0	1.1904	28.482	3	0	0.71848	27.625	5	0	0.92561	35.926	3	0	32.8	36.1	45.9
Q2FYF9	Q2FYF9	30S ribosomal protein S1, putative	>tr|Q2FYF9|Q2FYF9_STAA8 30S ribosomal protein S1, putative OS=Staphylococcus aureus (strain NCTC 8325) GN=SAOUHSC_01493 PE=4 SV=1	-0.20218	0.190141	0.535157	-0.707548	-0.434149		27	27	27	69.1	69.1	69.1	0	323.31	27	27	27	24	25	26	24	25	26	24	25	26	0.83657	0.7956	56.557	67	0	2.1615	28.585	22	0	0.64198	30.436	21	0	0.7049	53.692	24	0	63.9	62.9	69.1
Q2FYG0	Q2FYG0	GTPase Der	>sp|Q2FYG0|DER_STAA8 GTPase Der OS=Staphylococcus aureus (strain NCTC 8325) GN=der PE=3 SV=1	-0.347179	0.26	0.62499	-0.796035	-0.870493		4	4	4	12.8	12.8	12.8	0	54.328	4	4	4	3	2	3	3	2	3	3	2	3	0.64378	0.59571	54.804	8	7	2.2394	68.945	3	3	0.57095	7.856	2	1	0.51935	17.592	3	3	9.4	6.7	9.6
Q2FYG1	Q2FYG1	Glycerol-3-phosphate dehydrogenase [NAD(P)+]	>sp|Q2FYG1|GPDA_STAA8 Glycerol-3-phosphate dehydrogenase [NAD(P)+] OS=Staphylococcus aureus (strain NCTC 8325) GN=gpsA PE=3 SV=1	0.237833	0.498716	0.589284	-0.00487007	0.129085		9	9	9	33.4	33.4	33.4	0	30.494	9	9	9	6	6	6	6	6	6	6	6	6	1.0372	1.0782	11.805	9	0	2.2314	107.78	7	6	1.0347	16.286	4	0	1.0321	4.8313	4	0	28	19.9	28.9
Q2FYG2	Q2FYG2	DNA-binding protein HU, putative	>tr|Q2FYG2|Q2FYG2_STAA8 DNA-binding protein HU, putative OS=Staphylococcus aureus (strain NCTC 8325) GN=SAOUHSC_01490 PE=3 SV=1	0.156034	0.144194	0.874364	-0.387544	-0.0187172		13	13	13	84.4	84.4	84.4	0	323.31	13	13	13	13	13	13	13	13	13	13	13	13	1.2114	1.1801	67.084	54	0	2.7321	37.259	18	0	0.8129	37.87	17	0	0.92244	69.609	19	0	84.4	84.4	84.4
Q2FYG4	Q2FYG4	Putative uncharacterized protein	>tr|Q2FYG4|Q2FYG4_STAA8 Putative uncharacterized protein OS=Staphylococcus aureus (strain NCTC 8325) GN=SAOUHSC_01488 PE=4 SV=1	0.00447893	0.00460748	0.274649	-0.265691	NaN		6	6	6	35.3	35.3	35.3	0	13.272	6	6	6	4	4	2	4	4	2	4	4	2	1.0363	0.87777	26.685	4	0	1.6645	96.461	4	2	0.84992	124.04	3	2	NaN	NaN	1	0	23.2	25.3	11.1
Q2FYG5	Q2FYG5	Menaquinone biosynthesis methyltransferase, putative	>tr|Q2FYG5|Q2FYG5_STAA8 Menaquinone biosynthesis methyltransferase, putative OS=Staphylococcus aureus (strain NCTC 8325) GN=SAOUHSC_01487 PE=4 SV=1	-0.253864	0.253607	0.468844	-0.539519	-0.690917		5	5	5	33	33	33	0	35.912	5	5	5	3	3	3	3	3	3	3	3	3	0.86523	0.87839	50.337	8	7	2.0198	20.729	3	3	0.6948	46.29	3	3	0.60448	17.948	2	1	23	18	17
Q2FYG7	Q2FYG7	Nucleoside diphosphate kinase	>sp|Q2FYG7|NDK_STAA8 Nucleoside diphosphate kinase OS=Staphylococcus aureus (strain NCTC 8325) GN=ndk PE=3 SV=2	-0.240445	0.101739	0.852239	-1.78981	0.216238		9	9	9	55	55	55	0	104.45	9	9	9	8	5	8	8	5	8	8	5	8	1.1413	1.1545	71.42	9	0	2.6519	38.77	3	0	0.30651	112.09	7	5	1.126	30.41	4	0	55	53	55
Q2FYG9	Q2FYG9	Chorismate synthase	>sp|Q2FYG9|AROC_STAA8 Chorismate synthase OS=Staphylococcus aureus (strain NCTC 8325) GN=aroC PE=3 SV=1	0.0594921	0.188434	0.201634	-0.161185	0.138028		7	7	7	25	25	25	0	85.515	7	7	7	5	6	6	5	6	6	5	6	6	1.048	1.0478	23.623	12	0	1.7098	32.003	5	0	0.90698	18.998	4	0	1.0101	3.7402	3	0	18	22.2	22.2
Q2FYH0	Q2FYH0	3-dehydroquinate synthase	>sp|Q2FYH0|AROB_STAA8 3-dehydroquinate synthase OS=Staphylococcus aureus (strain NCTC 8325) GN=aroB PE=3 SV=1	0.175571	0.560692	0.148869	0.391878	-0.0140333		4	4	4	18.6	18.6	18.6	0	42.933	4	4	4	3	4	4	3	4	4	3	4	4	1.0565	1.1087	19.288	5	0	1.6094	60.574	3	2	1.3645	45.764	4	2	0.96648	69.467	5	3	13.3	18.6	18.6
Q2FYH2	Q2FYH2	Putative uncharacterized protein	>tr|Q2FYH2|Q2FYH2_STAA8 Putative uncharacterized protein OS=Staphylococcus aureus (strain NCTC 8325) GN=SAOUHSC_01480 PE=4 SV=1	0.286246	0.227332	0.161565	1.12671	-0.429537		5	5	5	12.8	12.8	12.8	0	7.9737	5	5	5	4	3	2	4	3	2	4	3	2	1.3166	1.1867	25.809	3	0	1.5751	68.713	4	3	2.1603	21.526	3	2	0.70599	66.308	2	1	11.7	7.9	6.8
Q2FYH6	Q2FYH6	Asparagine--tRNA ligase	>sp|Q2FYH6|SYN_STAA8 Asparagine--tRNA ligase OS=Staphylococcus aureus (strain NCTC 8325) GN=asnS PE=3 SV=1	-0.0486543	0.459337	0.0231843	-0.0543623	-0.114785		28	28	28	71.9	71.9	71.9	0	323.31	28	28	28	26	28	26	26	28	26	26	28	26	1.126	0.96323	32.1	99	0	1.4574	21.291	34	0	1.0234	28.109	31	0	0.88115	43.055	34	0	71.4	71.9	56.5
Q2FYI0	Q2FYI0	Penicillin-binding protein 2	>tr|Q2FYI0|Q2FYI0_STAA8 Penicillin-binding protein 2 OS=Staphylococcus aureus (strain NCTC 8325) GN=SAOUHSC_01467 PE=4 SV=1	0.33114	0.864232	0.538637	0.0727232	0.382059		18	18	18	40.2	40.2	40.2	0	185.33	18	18	18	16	12	12	16	12	12	16	12	12	1.2342	1.1858	24.717	32	0	1.8868	19.864	11	0	1.0394	22.056	11	0	1.2224	24.251	10	0	35.4	29	32.5
Q2FYI5	Q2FYI5	Cell cycle protein GpsB	>sp|Q2FYI5|GPSB_STAA8 Cell cycle protein GpsB OS=Staphylococcus aureus (strain NCTC 8325) GN=gpsB PE=3 SV=1	0.0314249	0.0302839	0.68921	-0.320144	-0.274791		4	4	4	34.2	34.2	34.2	0	190.34	4	4	4	4	4	4	4	4	4	4	4	4	0.87877	0.90031	36.911	10	0	2.2013	26.93	3	0	0.81764	13.181	4	0	0.79061	9.9294	3	0	34.2	34.2	34.2
Q2FYJ0	Q2FYJ0	Putative uncharacterized protein	>tr|Q2FYJ0|Q2FYJ0_STAA8 Putative uncharacterized protein OS=Staphylococcus aureus (strain NCTC 8325) GN=SAOUHSC_01455 PE=4 SV=1	-0.0360927	0.106249	0.167743	-0.229518	-0.0465038		22	22	22	20.9	20.9	20.9	0	113.89	22	22	22	13	17	16	13	17	16	13	17	16	1.0267	1.0424	34.345	13	0	1.69	30.163	5	0	0.84465	5.0006	4	0	0.94533	45.683	4	0	13.5	17	17.2
Q2FYJ2	Q2FYJ2	Alanine dehydrogenase 1	>sp|Q2FYJ2|DHA1_STAA8 Alanine dehydrogenase 1 OS=Staphylococcus aureus (strain NCTC 8325) GN=ald1 PE=3 SV=1	-0.0300917	0.0687357	0.0976109	0.129217	-0.317103		4	4	4	13.7	13.7	13.7	0	9.3105	4	4	4	3	4	4	3	4	4	3	4	4	1.3573	0.93177	26.396	5	0	1.4071	17.477	3	1	1.1019	67.757	4	2	0.78419	96.847	3	2	11.3	13.7	13.7
Q2FYK4	Q2FYK4	UPF0403 protein SAOUHSC_01436	>sp|Q2FYK4|Y1436_STAA8 UPF0403 protein SAOUHSC_01436 OS=Staphylococcus aureus (strain NCTC 8325) GN=SAOUHSC_01436 PE=3 SV=1	0.259216	0.574161	-0.0797372	0.449218	0.408168		5	5	5	29	29	29	0	50.117	5	5	5	5	5	3	5	5	3	5	5	3	1.3721	1.1185	36.349	11	0	1.3721	20.862	3	0	1.4277	36.104	5	0	1.2187	45.814	3	0	29	29	24.1
Q2FYK5	Q2FYK5	Thymidylate synthase	>sp|Q2FYK5|TYSY_STAA8 Thymidylate synthase OS=Staphylococcus aureus (strain NCTC 8325) GN=thyA PE=3 SV=1	0.455448	2.25651	0.388024	0.497331	0.480989		12	12	12	44	44	44	0	177.39	12	12	12	9	11	11	9	11	11	9	11	11	1.3745	1.4038	26.73	23	0	1.878	31.732	6	0	1.474	22.956	7	0	1.3229	26.174	10	0	32.1	39	41.5
Q2FYK6	Q2FYK6	Dihydrofolate reductase	>tr|Q2FYK6|Q2FYK6_STAA8 Dihydrofolate reductase OS=Staphylococcus aureus (strain NCTC 8325) GN=SAOUHSC_01434 PE=3 SV=1	-0.167904	0.165548	0.444031	-0.786622	-0.161121		5	5	5	50.9	50.9	50.9	0	35.891	5	5	5	3	5	3	3	5	3	3	5	3	0.67207	0.66508	51.626	9	0	1.8314	26.779	3	0	0.59647	14.675	4	0	0.85907	47.479	4	2	22.6	50.9	22.6
Q2FYK7	Q2FYK7	Putative uncharacterized protein	>tr|Q2FYK7|Q2FYK7_STAA8 Putative uncharacterized protein OS=Staphylococcus aureus (strain NCTC 8325) GN=SAOUHSC_01433 PE=4 SV=1	-0.0480734	0.0407282	0.706464	-0.471609	-0.379076		9	9	9	39.1	39.1	39.1	0	51.796	9	9	9	7	4	7	7	4	7	7	4	7	0.98118	1.0449	48.056	12	0	2.3537	20.464	5	0	0.75188	5.9569	3	0	0.7306	37.328	4	0	34.4	21.1	29.7
Q2FYL0	Q2FYL0	Phosphotransferase system enzyme IIA, putative	>tr|Q2FYL0|Q2FYL0_STAA8 Phosphotransferase system enzyme IIA, putative OS=Staphylococcus aureus (strain NCTC 8325) GN=SAOUHSC_01430 PE=4 SV=1	-0.41758	0.286446	0.488618	-1.36472	-0.376639		4	4	4	47.6	47.6	47.6	0	117.62	4	4	4	4	3	3	4	3	3	4	3	3	1.0625	0.90924	58.027	6	0	1.9735	30.094	3	0	0.41461	21.718	4	3	0.71772	17.777	4	2	47.6	43.4	43.4
Q2FYM1	Q2FYM1	2-oxoglutarate dehydrogenase E1 component	>sp|Q2FYM1|ODO1_STAA8 2-oxoglutarate dehydrogenase E1 component OS=Staphylococcus aureus (strain NCTC 8325) GN=odhA PE=3 SV=1	-0.0976283	0.43037	-0.268035	-0.0216725	-0.00317744		78	78	78	72.7	72.7	72.7	0	323.31	78	78	78	65	68	73	65	68	73	65	68	73	1.0628	0.93584	30.542	436	0	1.2277	24.964	132	0	1.0416	26.864	152	0	0.9623	36.378	152	0	69.7	70.2	70
Q2FYM2	Q2FYM2	Dihydrolipoyllysine-residue succinyltransferase component of 2-oxoglutarate dehydrogenase complex	>sp|Q2FYM2|ODO2_STAA8 Dihydrolipoyllysine-residue succinyltransferase component of 2-oxoglutarate dehydrogenase complex OS=Staphylococcus aureus (strain NCTC 8325) GN=odhB PE=3 SV=1	-0.0558846	0.305699	-0.0909412	0.0745054	-0.151218		24	24	24	53.6	53.6	53.6	0	323.01	24	24	24	20	17	21	20	17	21	20	17	21	1.1201	0.96443	47.273	69	0	1.3269	37.327	21	0	1.0924	44.289	22	0	0.86531	55.839	26	0	45	40.8	46.2
Q2FYM3	Q2FYM3	Putative uncharacterized protein	>tr|Q2FYM3|Q2FYM3_STAA8 Putative uncharacterized protein OS=Staphylococcus aureus (strain NCTC 8325) GN=SAOUHSC_01415 PE=4 SV=1	-0.513648	0.834888	-0.070618	-0.735548	-0.734779		7	7	7	48	48	48	0	144.58	7	7	7	7	6	6	7	6	6	7	6	6	0.82757	0.7196	52.639	14	0	1.3892	62.886	5	0	0.60839	33.783	4	0	0.58119	35.222	5	0	48	39.8	39.8
Q2FYN2	Q2FYN2	Cold shock protein CspA	>sp|Q2FYN2|CSPA_STAA8 Cold shock protein CspA OS=Staphylococcus aureus (strain NCTC 8325) GN=cspA PE=1 SV=1	0.0918506	0.0483777	1.16337	-0.958757	0.0709388		2	2	2	40.9	40.9	40.9	0	75.886	2	2	2	2	2	2	2	2	2	2	2	2	0.82855	0.82069	63.864	10	0	3.3863	10.929	3	1	0.56779	21.929	4	0	1.0162	55.625	4	0	40.9	40.9	40.9
Q2FYN4	Q2FYN4	Diaminopimelate decarboxylase	>tr|Q2FYN4|Q2FYN4_STAA8 Diaminopimelate decarboxylase OS=Staphylococcus aureus (strain NCTC 8325) GN=lysA PE=3 SV=1	0.0902554	1.22042	0.0985544	0.125651	0.0465608		13	13	13	48.7	48.7	48.7	0	135.3	13	13	13	11	11	10	11	11	10	11	11	10	1.1248	1.0811	28.163	27	0	1.6049	22.277	8	0	1.11	18.513	10	0	0.96137	39.379	9	0	39	39.4	37.8
Q2FYN6	Q2FYN6	Uncharacterized hydrolase SAOUHSC_01399	>sp|Q2FYN6|Y1399_STAA8 Uncharacterized hydrolase SAOUHSC_01399 OS=Staphylococcus aureus (strain NCTC 8325) GN=SAOUHSC_01399 PE=3 SV=1	0.041906	0.432073	-0.0310909	0.0772429	0.0795658		5	5	5	15.7	15.7	15.7	0	5.1393	5	5	5	4	3	4	4	3	4	4	3	4	1.0593	1.0336	16.559	8	0	1.3328	29.945	3	0	1.0411	8.76	2	0	1.0228	4.8618	3	0	12.3	8.6	12.8
Q2FYN7	Q2FYN7	2,3,4,5-tetrahydropyridine-2,6-dicarboxylate N-acetyltransferase	>sp|Q2FYN7|DAPH_STAA8 2,3,4,5-tetrahydropyridine-2,6-dicarboxylate N-acetyltransferase OS=Staphylococcus aureus (strain NCTC 8325) GN=dapH PE=3 SV=1	-0.2321	1.3177	-0.184474	-0.174214	-0.337612		7	7	7	28	28	28	0	82.556	7	7	7	6	6	6	6	6	6	6	6	6	0.95701	0.85784	25.738	10	0	1.2493	28.015	4	0	0.88461	36.083	3	0	0.75577	19.717	3	0	28	25.1	25.1
Q2FYP0	Q2FYP0	Aspartate-semialdehyde dehydrogenase	>tr|Q2FYP0|Q2FYP0_STAA8 Aspartate-semialdehyde dehydrogenase OS=Staphylococcus aureus (strain NCTC 8325) GN=asd PE=3 SV=1	-0.025906	0.158039	0.0854246	-0.0588486	-0.104294		12	12	12	52.9	52.9	52.9	0	72.481	12	12	12	11	12	11	11	12	11	11	12	11	0.99369	0.97026	21.235	30	0	1.5103	21.252	9	0	0.95054	16.985	11	0	0.90449	24.347	10	0	49.5	52.9	45
Q2FYP2	Q2FYP2	ABC transporter, ATP-binding protein, putative	>tr|Q2FYP2|Q2FYP2_STAA8 ABC transporter, ATP-binding protein, putative OS=Staphylococcus aureus (strain NCTC 8325) GN=SAOUHSC_01392 PE=4 SV=1	0.0853917	0.428363	-0.0632585	0.177216	0.142217		20	20	20	46	46	46	0	194.97	20	20	20	16	14	15	16	14	15	16	14	15	1.1749	1.0848	29.486	34	0	1.4043	17.72	11	0	1.1841	17.157	12	0	1.0223	44.32	11	0	32.8	35.6	39.4
Q2FYQ2	Q2FYQ2	Putative uncharacterized protein	>tr|Q2FYQ2|Q2FYQ2_STAA8 Putative uncharacterized protein OS=Staphylococcus aureus (strain NCTC 8325) GN=SAOUHSC_01383 PE=4 SV=1	-0.149483	2.05469	-0.172327	-0.123654	-0.152468		23	23	23	45.9	45.9	45.9	0	323.31	23	23	23	21	18	17	21	18	17	21	18	17	1.0113	0.89381	33.058	44	0	1.3097	15.706	16	0	0.92994	31.502	17	0	0.8607	50.944	11	0	44.5	44.7	37.4
Q2FYR1	Q2FYR1	Aminoacyltransferase FemB	>sp|Q2FYR1|FEMB_STAA8 Aminoacyltransferase FemB OS=Staphylococcus aureus (strain NCTC 8325) GN=femB PE=1 SV=1	0.0431089	0.318246	0.142348	0.0060466	-0.0190681		13	13	13	36.3	36.3	36.3	0	36.945	13	13	13	10	8	8	10	8	8	10	8	8	1.1343	1.0409	23.586	11	0	1.5581	7.9164	4	0	1.0194	7.7732	4	0	0.94269	48.094	3	0	26	25.1	28.6
Q2FYR2	Q2FYR2	Aminoacyltransferase FemA	>sp|Q2FYR2|FEMA_STAA8 Aminoacyltransferase FemA OS=Staphylococcus aureus (strain NCTC 8325) GN=femA PE=1 SV=1	-0.238563	0.374782	0.12075	-0.14757	-0.688869		8	8	8	20.7	20.7	20.7	0	29.202	8	8	8	7	8	8	7	8	8	7	8	8	1.0433	0.88111	48.483	7	0	1.5193	57.049	3	0	0.91945	61.882	8	6	0.58963	37.255	6	4	18.3	20.7	20.7
Q2FYS0	Q2FYS0	Putative uncharacterized protein	>tr|Q2FYS0|Q2FYS0_STAA8 Putative uncharacterized protein OS=Staphylococcus aureus (strain NCTC 8325) GN=SAOUHSC_01365 PE=4 SV=1	0.0256653	0.216054	0.0840642	0.0501883	-0.0572565		9	9	9	38.5	38.5	38.5	0	156.33	9	9	9	8	7	9	8	7	9	8	7	9	1.0494	1.0331	30.117	15	0	1.5772	17.827	6	0	1.0533	12.513	4	0	0.8972	43.96	5	0	35.3	31.8	38.5
Q2FYS5	Q2FYS5	DNA topoisomerase 4 subunit B	>sp|Q2FYS5|PARE_STAA8 DNA topoisomerase 4 subunit B OS=Staphylococcus aureus (strain NCTC 8325) GN=parE PE=3 SV=1	-0.117406	0.224325	0.136848	-0.00392947	-0.485135		4	4	4	7.7	7.7	7.7	0	3.8314	4	4	4	4	1	2	4	1	2	4	1	2	1.1127	0.99984	22.217	10	0	1.6743	15.973	4	0	1.0565	11.029	3	0	0.67185	14.098	3	0	7.7	1.8	4.8
Q2FYS8	Q2FYS8	Putative uncharacterized protein	>tr|Q2FYS8|Q2FYS8_STAA8 Putative uncharacterized protein OS=Staphylococcus aureus (strain NCTC 8325) GN=SAOUHSC_01348 PE=4 SV=1	-0.0265428	0.0665934	0.202888	-0.0328314	-0.249685		4	4	4	18.7	18.7	18.7	0	4.579	4	4	4	3	3	4	3	3	4	3	3	4	1.033	1.04	14.537	6	0	1.7355	52.901	3	1	1.0095	18.545	2	0	0.81573	90.375	3	1	14.2	11.6	18.7
Q2FYS9	Q2FYS9	Aconitate hydratase	>tr|Q2FYS9|Q2FYS9_STAA8 Aconitate hydratase OS=Staphylococcus aureus (strain NCTC 8325) GN=SAOUHSC_01347 PE=3 SV=1	0.238613	0.881184	0.0519985	0.373063	0.290778		67	67	67	73	73	73	0	323.31	67	67	67	57	61	65	57	61	65	57	61	65	1.3846	1.1722	34.28	222	0	1.5104	27.577	70	0	1.405	30.354	77	0	1.1665	41.71	75	0	68	70	73
Q2FYT0	Q2FYT0	Glycine betaine transporter, putative	>tr|Q2FYT0|Q2FYT0_STAA8 Glycine betaine transporter, putative OS=Staphylococcus aureus (strain NCTC 8325) GN=SAOUHSC_01346 PE=4 SV=1	-0.00399375	0.0135733	0.0164963	-0.172132	0.143655		5	5	5	7.7	7.7	7.7	0	44.695	5	5	5	5	4	4	5	4	4	5	4	4	1.1081	1.0042	10.594	10	0	1.477	8.0269	4	0	0.87733	5.546	3	0	1.0798	8.6229	3	0	7.7	5.8	5.8
Q2FYT3	Q2FYT3	Nuclease SbcCD subunit C	>sp|Q2FYT3|SBCC_STAA8 Nuclease SbcCD subunit C OS=Staphylococcus aureus (strain NCTC 8325) GN=sbcC PE=1 SV=2	0.700123	0.547339	1.63008	0.455649	0.014641		3	3	3	4.1	4.1	4.1	0	4.0084	3	3	3	2	2	3	2	2	3	2	2	3	1.3117	1.3673	56.377	7	7	3.883	49.403	2	2	1.3621	5.3172	2	2	1.0378	28.252	3	3	2	2	4.1
Q2FYT8	Q2FYT8	Transketolase	>tr|Q2FYT8|Q2FYT8_STAA8 Transketolase OS=Staphylococcus aureus (strain NCTC 8325) GN=SAOUHSC_01337 PE=4 SV=1	-0.138913	0.436556	0.100574	-0.252106	-0.265206		36	36	36	61.1	61.1	61.1	0	323.31	36	36	36	33	30	32	33	30	32	33	30	32	0.95678	0.90578	69.296	97	0	1.5921	78.788	33	0	0.86297	17.846	31	0	0.7997	87.523	33	0	55	59.4	58.2
Q2FYT9	Q2FYT9	UPF0291 protein SAOUHSC_01336	>tr|Q2FYT9|Q2FYT9_STAA8 UPF0291 protein SAOUHSC_01336 OS=Staphylococcus aureus (strain NCTC 8325) GN=SAOUHSC_01336 PE=3 SV=1	-0.014073	0.0282026	0.274172	-0.270156	-0.0462356		3	3	3	39.2	39.2	39.2	0	6.076	3	3	3	2	3	3	2	3	3	2	3	3	0.95723	0.96	31.046	6	0	1.7425	9.5438	2	1	0.85796	19.469	2	0	0.90871	39.347	3	0	26.6	39.2	39.2
Q2FYU5	Q2FYU5	30S ribosomal protein S14	>sp|Q2FYU5|RS14_STAA8 30S ribosomal protein S14 OS=Staphylococcus aureus (strain NCTC 8325) GN=rpsN PE=3 SV=1	0.165014	0.261447	NaN	-0.0267929	0.35682		2	2	2	21.3	21.3	21.3	0	3.8745	2	2	2	1	2	2	1	2	2	1	2	2	1.1849	1.1712	42.731	5	0	NaN	NaN	1	0	0.99796	24.969	2	0	1.2223	73.57	2	0	10.1	21.3	21.3
Q2FYU6;Q2FY22	Q2FYU6	50S ribosomal protein L33 1	>sp|Q2FYU6|RL331_STAA8 50S ribosomal protein L33 1 OS=Staphylococcus aureus (strain NCTC 8325) GN=rpmG1 PE=3 SV=1	-0.157883	0.513878	0.0533895	-0.346151	-0.180888		5	5	5	77.6	77.6	77.6	0	7.1541	NaN	NaN	NaN	4	4	4	4	4	4	4	4	4	1.0527	0.95374	27.443	18	0	1.4118	19.518	5	0	0.80629	32.164	6	0	0.83421	29.808	7	0	61.2	61.2	38.8
Q2FYU7	Q2FYU7	Catalase	>sp|Q2FYU7|CATA_STAA8 Catalase OS=Staphylococcus aureus (strain NCTC 8325) GN=katA PE=2 SV=2	-0.0733123	0.316643	0.095587	-0.182835	-0.132689		44	44	44	76.8	76.8	76.8	0	323.31	44	44	44	37	40	41	37	40	41	37	40	41	1.0289	0.9275	37.281	149	0	1.6213	31.939	50	0	0.93202	30.675	48	0	0.88455	44.039	51	0	67.1	75.8	70.9
Q2FYU8	Q2FYU8	Putative uncharacterized protein	>tr|Q2FYU8|Q2FYU8_STAA8 Putative uncharacterized protein OS=Staphylococcus aureus (strain NCTC 8325) GN=SAOUHSC_01326 PE=4 SV=1	-0.819096	0.294994	0.0182068	-1.6564	NaN		3	3	3	6.6	6.6	6.6	0	2.1601	3	3	3	3	2	1	3	2	1	3	2	1	1.2561	0.90571	66.316	7	5	1.4317	32.29	4	2	0.31927	9.6884	2	2	NaN	NaN	1	1	6.6	3.5	1.7
Q2FYV0	Q2FYV0	Putative uncharacterized protein	>tr|Q2FYV0|Q2FYV0_STAA8 Putative uncharacterized protein OS=Staphylococcus aureus (strain NCTC 8325) GN=SAOUHSC_01324 PE=4 SV=1	-0.471806	0.48802	NaN	-0.7361	-0.207511		3	3	3	20.2	20.2	20.2	0	4.0218	3	3	3	1	2	2	1	2	2	1	2	2	0.83552	0.86603	47.347	4	0	NaN	NaN	1	0	0.60305	36.189	2	1	0.81983	11.064	2	0	10.6	20.2	10.6
Q2FYV1	Q2FYV1	Putative uncharacterized protein	>tr|Q2FYV1|Q2FYV1_STAA8 Putative uncharacterized protein OS=Staphylococcus aureus (strain NCTC 8325) GN=SAOUHSC_01323 PE=4 SV=1	0.0022246	0.00305373	0.33514	0.0966667	-0.425133		7	7	7	40.8	40.8	40.8	0	98.014	7	7	7	6	7	7	6	7	7	6	7	7	1.0813	1.059	30.374	20	0	1.85	21.837	5	0	1.0679	20.05	7	0	0.71377	33.473	8	0	34.1	40.8	40.8
Q2FYV3	Q2FYV3	Threonine synthase	>tr|Q2FYV3|Q2FYV3_STAA8 Threonine synthase OS=Staphylococcus aureus (strain NCTC 8325) GN=SAOUHSC_01321 PE=3 SV=1	-0.00691285	0.0143085	0.267116	-0.252793	-0.0350617		13	13	13	45.3	45.3	45.3	0	114.68	13	13	13	9	11	11	9	11	11	9	11	11	0.92831	0.97599	36.143	20	0	1.772	12.766	6	0	0.84814	13.958	6	0	0.92831	48.251	8	0	34.3	39.4	39.9
Q2FYV4	Q2FYV4	Homoserine dehydrogenase	>tr|Q2FYV4|Q2FYV4_STAA8 Homoserine dehydrogenase OS=Staphylococcus aureus (strain NCTC 8325) GN=SAOUHSC_01320 PE=3 SV=1	-0.27143	0.248402	0.259182	-0.0260729	-1.0474		7	7	7	18.3	18.3	18.3	0	16.304	7	7	7	5	5	4	5	5	4	5	5	4	0.97202	0.91382	34.87	8	0	1.6504	65.539	3	1	0.97958	8.8016	3	0	0.44769	42.378	3	0	10.1	13.8	10.6
Q2FYV5	Q2FYV5	Aspartokinase	>tr|Q2FYV5|Q2FYV5_STAA8 Aspartokinase OS=Staphylococcus aureus (strain NCTC 8325) GN=SAOUHSC_01319 PE=3 SV=1	-0.0144802	0.0350952	0.23842	-0.0784418	-0.203419		5	5	5	13	13	13	0	5.4913	5	5	5	4	4	3	4	4	3	4	4	3	0.92615	0.94708	53.05	11	0	1.5283	81.238	4	0	0.92615	19.25	3	0	0.81377	44.554	4	0	10	13	10
Q2FYV7	Q2FYV7	Putative uncharacterized protein	>tr|Q2FYV7|Q2FYV7_STAA8 Putative uncharacterized protein OS=Staphylococcus aureus (strain NCTC 8325) GN=SAOUHSC_01317 PE=4 SV=1	-0.175165	0.16109	0.564134	-0.39227	-0.697359		8	8	8	45.8	45.8	45.8	0	11.24	8	8	8	6	4	2	6	4	2	6	4	2	0.86319	0.87228	49.841	6	0	1.9968	54.476	6	4	0.76626	33.085	4	2	0.59523	49.292	2	0	26.4	28.9	9.5
Q2FYW4	Q2FYW4	Cardiolipin synthase	>tr|Q2FYW4|Q2FYW4_STAA8 Cardiolipin synthase OS=Staphylococcus aureus (strain NCTC 8325) GN=SAOUHSC_01310 PE=3 SV=1	0.400306	0.63573	0.0223323	0.345737	0.83285		4	4	4	7.5	7.5	7.5	0	3.8514	4	4	4	3	2	2	3	2	2	3	2	2	1.2613	1.0156	19.113	3	0	1.3494	31.804	3	1	1.2613	49.146	3	2	1.7181	0.54877	2	2	5.7	3.9	3.4
Q2FYY6	Q2FYY6	Glutamine synthetase	>tr|Q2FYY6|Q2FYY6_STAA8 Glutamine synthetase OS=Staphylococcus aureus (strain NCTC 8325) GN=SAOUHSC_01287 PE=3 SV=1	0.0244346	0.0613402	-0.23099	0.109829	0.194465		43	43	43	84.5	84.5	84.5	0	323.31	43	43	43	39	37	41	39	37	41	39	37	41	1.1827	0.99646	55.342	161	0	1.22	37.637	55	0	1.1669	49.502	51	0	1.0782	66.969	55	0	83	83.4	84.5
Q2FYY8	Q2FYY8	Putative uncharacterized protein	>tr|Q2FYY8|Q2FYY8_STAA8 Putative uncharacterized protein OS=Staphylococcus aureus (strain NCTC 8325) GN=SAOUHSC_01284 PE=4 SV=1	0.0817206	0.566577	0.182184	0.0672257	-0.00424777		5	5	5	14.8	14.8	14.8	0	15.515	5	5	5	4	3	4	4	3	4	4	3	4	1.0698	1.0432	23.14	7	0	1.4888	18.562	4	2	1.082	0.61095	2	0	0.93946	35.47	3	0	11.2	8.3	11.9
Q2FYZ0	Q2FYZ0	Glutathione peroxidase	>tr|Q2FYZ0|Q2FYZ0_STAA8 Glutathione peroxidase OS=Staphylococcus aureus (strain NCTC 8325) GN=SAOUHSC_01282 PE=3 SV=1	0.238345	0.373096	0.689031	0.15043	-0.124424		11	11	11	60.8	60.8	60.8	0	98.703	11	11	11	10	11	11	10	11	11	10	11	11	1.2173	1.115	36.931	26	0	2.5233	31.882	7	0	1.1735	19.571	9	0	0.84988	41.18	10	0	60.8	60.8	60.8
Q2FYZ3	Q2FYZ3	Hydrolase, alpha/beta fold family domain protein	>tr|Q2FYZ3|Q2FYZ3_STAA8 Hydrolase, alpha/beta fold family domain protein OS=Staphylococcus aureus (strain NCTC 8325) GN=SAOUHSC_01279 PE=4 SV=1	0.336145	1.06964	0.290896	NaN	0.381394		4	4	4	11.8	11.8	11.8	0	5.6134	4	4	4	4	1	3	4	1	3	4	1	3	1.2087	1.2234	26.003	5	0	1.6598	32.356	3	0	NaN	NaN	1	0	1.2326	7.4074	3	2	11.8	3.9	8.9
Q2FYZ4	Q2FYZ4	Aerobic glycerol-3-phosphate dehydrogenase	>sp|Q2FYZ4|GLPD_STAA8 Aerobic glycerol-3-phosphate dehydrogenase OS=Staphylococcus aureus (strain NCTC 8325) GN=glpD PE=3 SV=1	-0.093353	0.442077	0.0565835	-0.122319	-0.214324		33	33	33	50.8	50.8	50.8	0	218.76	33	33	33	27	29	29	27	29	29	27	29	29	1.0259	0.91871	26.804	78	0	1.4765	21.459	26	0	0.96486	22.485	26	0	0.82817	32.996	26	0	49.4	44.7	49.4
Q2FYZ5	Q2FYZ5	Glycerol kinase	>sp|Q2FYZ5|GLPK_STAA8 Glycerol kinase OS=Staphylococcus aureus (strain NCTC 8325) GN=glpK PE=3 SV=1	-0.0689181	0.363753	-0.200996	0.0411028	-0.0468614		35	35	35	65.1	65.1	65.1	0	323.31	35	35	35	32	32	30	32	32	30	32	32	30	1.1018	0.94576	31.929	89	0	1.3173	28.352	32	0	1.0779	33.619	29	0	0.91618	33.874	28	0	63.7	49.6	56.8
Q2FYZ6	Q2FYZ6	Putative uncharacterized protein	>tr|Q2FYZ6|Q2FYZ6_STAA8 Putative uncharacterized protein OS=Staphylococcus aureus (strain NCTC 8325) GN=SAOUHSC_01275 PE=3 SV=1	-0.208497	0.449594	-0.200681	-0.514985	0.0901759		3	3	3	11	11	11	0	7.9332	3	3	3	3	3	3	3	3	3	3	3	3	0.99087	0.86338	32.023	9	0	1.3009	14.831	3	0	0.7393	18.393	3	0	0.99087	38.724	3	0	11	11	11
Q2FYZ9	Q2FYZ9	DNA mismatch repair protein MutS	>sp|Q2FYZ9|MUTS_STAA8 DNA mismatch repair protein MutS OS=Staphylococcus aureus (strain NCTC 8325) GN=mutS PE=3 SV=2	0.100452	0.314345	0.06226	0.321582	-0.0824842		10	10	10	15.3	15.3	15.3	0	28.181	10	10	10	5	5	9	5	5	9	5	5	9	1.3201	1.039	11.48	5	0	1.4668	95.709	4	2	1.6321	82.893	6	5	0.92088	87.309	7	5	6.9	6.9	14
Q2FZ03	Q2FZ03	Putative uncharacterized protein	>tr|Q2FZ03|Q2FZ03_STAA8 Putative uncharacterized protein OS=Staphylococcus aureus (strain NCTC 8325) GN=SAOUHSC_01268 PE=4 SV=1	0.272536	0.902965	0.158208	0.485633	0.173767		6	6	6	74.2	74.2	74.2	0	97.349	6	6	6	6	4	5	6	4	5	6	4	5	1.4451	1.128	28.407	9	0	1.4933	17.008	3	0	1.4561	27.463	3	0	1.0619	33.966	3	0	74.2	43.3	59.8
Q2FZ04	Q2FZ04	Putative uncharacterized protein	>tr|Q2FZ04|Q2FZ04_STAA8 Putative uncharacterized protein OS=Staphylococcus aureus (strain NCTC 8325) GN=SAOUHSC_01267 PE=4 SV=1	0.623824	1.19235	0.953377	0.421479	0.496616		6	6	6	29.5	29.5	29.5	0	23.134	6	6	6	5	4	4	5	4	4	5	4	4	1.496	1.5429	21.826	8	0	2.6835	7.9154	4	2	1.3526	18.39	3	0	1.3386	23.68	3	0	26.7	17	16.7
Q2FZ05	Q2FZ05	Putative uncharacterized protein	>tr|Q2FZ05|Q2FZ05_STAA8 Putative uncharacterized protein OS=Staphylococcus aureus (strain NCTC 8325) GN=SAOUHSC_01266 PE=4 SV=1	0.115633	0.637722	0.195222	-0.0192728	0.170951		14	14	14	30.7	30.7	30.7	0	28.901	14	14	14	10	8	11	10	8	11	10	8	11	1.226	1.1006	30.149	28	0	1.5589	17.599	9	0	0.99766	29.012	8	0	1.1345	39.398	11	0	24.6	20.8	27.6
Q2FZ07	Q2FZ07	Putative uncharacterized protein	>tr|Q2FZ07|Q2FZ07_STAA8 Putative uncharacterized protein OS=Staphylococcus aureus (strain NCTC 8325) GN=SAOUHSC_01264 PE=4 SV=1	0.321232	0.818258	0.112767	0.258579	0.592349		6	6	6	88.7	88.7	88.7	0	84.373	6	6	6	5	5	6	5	5	6	5	5	6	1.3486	1.1515	21.812	14	0	1.4264	15.135	5	0	1.2068	20.62	5	0	1.4263	21.746	4	0	83.1	83.1	88.7
Q2FZ08	Q2FZ08	Ribonuclease Y	>sp|Q2FZ08|RNY_STAA8 Ribonuclease Y OS=Staphylococcus aureus (strain NCTC 8325) GN=rny PE=1 SV=1	-0.0590791	0.0726048	0.471864	-0.259461	-0.38964		5	5	5	12.9	12.9	12.9	0	18.085	5	5	5	3	3	4	3	3	4	3	3	4	0.89214	0.8847	26.274	8	0	1.9012	37.679	4	2	0.8625	10.803	3	0	0.72899	20.711	3	0	8.9	8.5	10.6
Q2FZ09	Q2FZ09	Protein RecA	>tr|Q2FZ09|Q2FZ09_STAA8 Protein RecA OS=Staphylococcus aureus (strain NCTC 8325) GN=recA PE=3 SV=1	-0.11851	0.123729	0.536351	-0.45506	-0.436822		15	15	15	55.3	55.3	55.3	0	159.84	15	15	15	14	10	10	14	10	10	14	10	10	1.0148	1.0544	44.609	19	0	2.0762	22.354	6	0	0.74918	31.042	5	0	0.71211	37.584	8	0	50.3	40.1	42.5
Q2FZ10	Q2FZ10	Putative competence-damage inducible protein	>tr|Q2FZ10|Q2FZ10_STAA8 Putative competence-damage inducible protein OS=Staphylococcus aureus (strain NCTC 8325) GN=cinA PE=3 SV=1	-0.217488	0.22646	0.399663	-0.255667	-0.796461		7	7	7	23.8	23.8	23.8	0	12.651	7	7	7	6	4	5	6	4	5	6	4	5	1.38	1.4092	22.019	3	0	1.8792	124.96	5	4	0.84427	138.96	5	4	0.55892	153.94	6	5	20.6	12.5	15.7
Q2FZ15	Q2FZ15	Putative uncharacterized protein	>tr|Q2FZ15|Q2FZ15_STAA8 Putative uncharacterized protein OS=Staphylococcus aureus (strain NCTC 8325) GN=SAOUHSC_01256 PE=3 SV=1	-0.00146334	0.0116744	0.0106367	-0.0742436	0.0592169		11	11	11	31.8	31.8	31.8	0	21.385	11	11	11	7	9	8	7	9	8	7	9	8	0.99007	0.96106	23.351	8	0	1.3827	57.583	4	3	0.91556	38.376	3	0	0.99007	15.271	4	0	20.6	22.7	23.4
Q2FZ16	Q2FZ16	Putative uncharacterized protein	>tr|Q2FZ16|Q2FZ16_STAA8 Putative uncharacterized protein OS=Staphylococcus aureus (strain NCTC 8325) GN=SAOUHSC_01255 PE=3 SV=1	0.147331	0.781787	0.0123541	0.192321	0.237319		12	12	12	29.7	29.7	29.7	0	50.012	12	12	12	10	10	10	10	10	10	10	10	10	1.1875	1.129	17.384	27	0	1.414	20.279	10	0	1.1626	11.865	8	0	1.1565	15.513	9	0	24.5	24.7	25.7
Q2FZ17	Q2FZ17	Putative uncharacterized protein	>tr|Q2FZ17|Q2FZ17_STAA8 Putative uncharacterized protein OS=Staphylococcus aureus (strain NCTC 8325) GN=SAOUHSC_01254 PE=4 SV=1	0.297765	1.0508	0.46069	0.130667	0.301939		3	3	3	19.4	19.4	19.4	0	14.051	3	3	3	3	2	2	3	2	2	3	2	2	1.1885	1.1169	9.9806	4	0	1.8132	38.556	2	1	1.1089	2.8406	2	1	1.1885	8.2996	2	0	19.4	11.4	11.4
Q2FZ19	Q2FZ19	Ribonuclease J 2	>sp|Q2FZ19|RNJ2_STAA8 Ribonuclease J 2 OS=Staphylococcus aureus (strain NCTC 8325) GN=rnj2 PE=1 SV=2	-0.0555644	0.240967	0.075738	-0.0319019	-0.210529		19	19	19	33.9	33.9	33.9	0	77.498	19	19	19	15	18	17	15	18	17	15	18	17	1.089	1.0256	21.432	40	0	1.5129	18.207	11	0	1.0362	13.496	14	0	0.86934	27.514	15	0	25.9	31.8	27.5
Q2FZ20	Q2FZ20	Polyribonucleotide nucleotidyltransferase	>sp|Q2FZ20|PNP_STAA8 Polyribonucleotide nucleotidyltransferase OS=Staphylococcus aureus (strain NCTC 8325) GN=pnp PE=1 SV=1	-0.0826329	0.333424	-0.193734	0.100036	-0.154201		34	34	34	50.7	50.7	50.7	0	270.28	34	34	34	29	31	30	29	31	30	29	31	30	1.0718	0.94436	26.849	78	0	1.282	16.651	22	0	1.0821	27.154	29	0	0.88994	32.096	27	0	44.8	46.4	44.6
Q2FZ21	Q2FZ21	Ribosome-recycling factor	>sp|Q2FZ21|RRF_STAA8 Ribosome-recycling factor OS=Staphylococcus aureus (strain NCTC 8325) GN=frr PE=3 SV=1	-0.0897927	0.057525	0.894992	-0.797513	-0.366857		9	9	9	52.7	52.7	52.7	0	94.863	9	9	9	7	7	8	7	7	8	7	7	8	0.80544	0.84156	64.186	22	0	2.683	27.925	9	0	0.59083	47.169	7	0	0.7401	21.313	6	0	44.6	47.3	42.9
Q2FZ22	Q2FZ22	Uridylate kinase	>sp|Q2FZ22|PYRH_STAA8 Uridylate kinase OS=Staphylococcus aureus (strain NCTC 8325) GN=pyrH PE=1 SV=1	-0.0465825	0.174901	-0.220446	0.101112	-0.0204136		9	9	9	33.3	33.3	33.3	0	73.041	9	9	9	8	9	9	8	9	9	8	9	9	1.1468	0.96982	21.691	26	0	1.2887	20.209	8	0	1.1046	13.096	9	0	0.90424	24.45	9	0	32.9	33.3	33.3
Q2FZ23	Q2FZ23	Elongation factor Ts	>sp|Q2FZ23|EFTS_STAA8 Elongation factor Ts OS=Staphylococcus aureus (strain NCTC 8325) GN=tsf PE=3 SV=1	0.0306151	0.233068	0.125387	-0.0198284	-0.0137128		32	32	32	82.6	82.6	82.6	0	323.31	32	32	32	31	28	28	31	28	28	31	28	28	1.2012	1.0209	39.261	116	0	1.5771	27.503	40	0	1.0376	37.696	39	0	0.92849	48.118	37	0	79.5	79.5	82.6
Q2FZ25	Q2FZ25	30S ribosomal protein S2	>sp|Q2FZ25|RS2_STAA8 30S ribosomal protein S2 OS=Staphylococcus aureus (strain NCTC 8325) GN=rpsB PE=3 SV=2	-0.100175	0.362668	0.0813396	-0.106094	-0.275769		21	21	21	70.6	70.6	70.6	0	227.17	21	21	21	16	16	19	16	16	19	16	16	19	1.0806	0.97443	37.785	48	0	1.5104	16.793	15	0	0.98473	34.005	16	0	0.78904	51.157	17	0	60	65.5	70.6
Q2FZ27	Q2FZ27	GTP-sensing transcriptional pleiotropic repressor CodY	>sp|Q2FZ27|CODY_STAA8 GTP-sensing transcriptional pleiotropic repressor CodY OS=Staphylococcus aureus (strain NCTC 8325) GN=codY PE=3 SV=1	-0.253153	0.166286	0.778881	-0.534642	-1.0037		15	15	15	49.4	49.4	49.4	0	149.02	15	15	15	11	11	14	11	11	14	11	11	14	0.81122	0.82752	61.64	32	0	2.4971	26.968	10	0	0.73169	24.141	11	0	0.46969	62.275	11	0	42	41.6	44.7
Q2FZ28	Q2FZ28	ATP-dependent protease ATPase subunit HslU	>sp|Q2FZ28|HSLU_STAA8 ATP-dependent protease ATPase subunit HslU OS=Staphylococcus aureus (strain NCTC 8325) GN=hslU PE=3 SV=1	0.164894	0.188974	0.215989	-0.394411	0.673104		10	10	10	25.5	25.5	25.5	0	14.795	10	10	10	6	9	7	6	9	7	6	9	7	1.3701	1.3211	44.134	14	0	1.6616	20.894	4	0	0.76236	47.745	5	0	1.5303	30.201	5	0	14.3	23.1	17.8
Q2FZ29	Q2FZ29	ATP-dependent protease subunit HslV	>sp|Q2FZ29|HSLV_STAA8 ATP-dependent protease subunit HslV OS=Staphylococcus aureus (strain NCTC 8325) GN=hslV PE=3 SV=1	0.208481	0.6296	0.419539	0.215617	-0.0097131		5	5	5	41.4	41.4	41.4	0	27.75	5	5	5	4	5	4	4	5	4	4	5	4	1.2103	1.1209	20.693	10	0	1.9284	32.801	3	0	1.2071	14.062	3	0	0.98069	18.685	4	0	31.5	41.4	31.5
Q2FZ31	Q2FZ31	Methylenetetrahydrofolate--tRNA-(uracil-5-)-methyltransferase TrmFO	>sp|Q2FZ31|TRMFO_STAA8 Methylenetetrahydrofolate--tRNA-(uracil-5-)-methyltransferase TrmFO OS=Staphylococcus aureus (strain NCTC 8325) GN=trmFO PE=3 SV=1	-0.0233153	0.0398641	-0.139569	0.343123	-0.2735		6	6	6	17	17	17	0	39.811	6	6	6	4	5	5	4	5	5	4	5	5	1.1369	1.0155	24.901	8	0	1.3302	23.356	3	0	1.2788	31.276	5	3	0.78664	26.951	3	0	11	14.7	14.7
Q2FZ36	Q2FZ36	Succinyl-CoA ligase [ADP-forming] subunit alpha	>tr|Q2FZ36|Q2FZ36_STAA8 Succinyl-CoA ligase [ADP-forming] subunit alpha OS=Staphylococcus aureus (strain NCTC 8325) GN=SAOUHSC_01218 PE=3 SV=1	0.095394	1.79869	0.118094	0.091666	0.0764222		19	19	19	71.9	71.9	71.9	0	323.31	19	19	19	19	19	19	19	19	19	19	19	19	1.2023	1.0664	25.24	106	0	1.6116	26.446	35	0	1.1288	16.345	35	0	1.0022	31.03	36	0	71.9	71.9	71.9
Q2FZ37	Q2FZ37	Succinyl-CoA ligase [ADP-forming] subunit beta	>sp|Q2FZ37|SUCC_STAA8 Succinyl-CoA ligase [ADP-forming] subunit beta OS=Staphylococcus aureus (strain NCTC 8325) GN=sucC PE=3 SV=1	-0.087724	0.872786	-0.149057	-0.0891292	-0.0249862		31	31	31	63.4	63.4	63.4	0	323.31	31	31	31	26	28	31	26	28	31	26	28	31	1.0638	0.91862	38.667	80	0	1.3455	27.669	26	0	0.99481	35.989	27	0	0.9449	49.36	27	0	60.3	59.8	63.4
Q2FZ42	Q2FZ42	50S ribosomal protein L19	>sp|Q2FZ42|RL19_STAA8 50S ribosomal protein L19 OS=Staphylococcus aureus (strain NCTC 8325) GN=rplS PE=3 SV=1	-0.263389	0.12483	1.179	-0.929501	-1.03967		12	12	12	58.6	58.6	58.6	0	40.68	12	12	12	10	10	10	10	10	10	10	10	10	0.66509	0.68583	76.803	27	0	3.1952	35.584	10	0	0.5375	30.638	9	0	0.45956	41.5	8	0	52.6	52.6	58.6
Q2FZ44	Q2FZ44	Ribosome maturation factor RimM	>sp|Q2FZ44|RIMM_STAA8 Ribosome maturation factor RimM OS=Staphylococcus aureus (strain NCTC 8325) GN=rimM PE=3 SV=1	-0.305523	0.133771	0.385265	NaN	-0.996311		2	2	2	22.2	22.2	22.2	0	16.076	2	2	2	2	1	2	2	1	2	2	1	2	1.1497	1.0224	57.576	6	0	1.8415	22.578	3	0	NaN	NaN	1	1	0.49278	29.984	3	0	22.2	9.6	22.2
Q2FZ45	Q2FZ45	30S ribosomal protein S16	>sp|Q2FZ45|RS16_STAA8 30S ribosomal protein S16 OS=Staphylococcus aureus (strain NCTC 8325) GN=rpsP PE=3 SV=1	-0.148086	0.114356	0.731878	-0.576433	-0.599703		3	3	3	49.5	49.5	49.5	0	41.598	3	3	3	3	2	2	3	2	2	3	2	2	0.97518	0.9498	52.659	12	10	2.5116	29.224	5	4	0.71459	15.913	3	3	0.63403	35.351	4	3	49.5	49.5	49.5
Q2FZ48	Q2FZ48	Signal recognition particle receptor FtsY	>tr|Q2FZ48|Q2FZ48_STAA8 Signal recognition particle receptor FtsY OS=Staphylococcus aureus (strain NCTC 8325) GN=ftsY PE=3 SV=1	0.0949738	1.4182	0.0617071	0.127897	0.0953169		9	9	9	35.3	35.3	35.3	0	59.355	9	9	9	7	5	7	7	5	7	7	5	7	1.1373	1.0732	22.03	11	0	1.4761	23.649	3	0	1.1089	14.618	4	0	1.0278	30.995	4	0	25.2	13.2	27.4
Q2FZ49	Q2FZ49	Chromosome partition protein Smc	>tr|Q2FZ49|Q2FZ49_STAA8 Chromosome partition protein Smc OS=Staphylococcus aureus (strain NCTC 8325) GN=smc PE=3 SV=1	0.195894	0.340941	0.0253123	0.366476	NaN		3	3	3	2.9	2.9	2.9	0	7.7697	3	3	3	2	2	1	2	2	1	2	2	1	1.3232	1.2213	23.392	4	0	1.3093	14.154	2	1	1.3393	38.432	2	0	NaN	NaN	1	0	2.1	2.3	1.4
Q2FZ51	Q2FZ51	Acyl carrier protein	>sp|Q2FZ51|ACP_STAA8 Acyl carrier protein OS=Staphylococcus aureus (strain NCTC 8325) GN=acpP PE=2 SV=1	-0.748461	0.815351	-0.129687	-0.848583	-1.26711		4	4	4	40.3	40.3	40.3	0	9.1805	4	4	4	3	3	4	3	3	4	3	3	4	1.0101	0.77157	40.185	9	0	1.2914	10.069	3	0	0.5634	32.939	3	0	0.39203	63.099	3	0	31.2	31.2	40.3
Q2FZ53	Q2FZ53	3-oxoacyl-(Acyl-carrier-protein) reductase, putative	>tr|Q2FZ53|Q2FZ53_STAA8 3-oxoacyl-(Acyl-carrier-protein) reductase, putative OS=Staphylococcus aureus (strain NCTC 8325) GN=SAOUHSC_01199 PE=1 SV=1	0.162886	1.20898	0.242572	0.148609	0.097476		16	16	16	76.2	76.2	76.2	0	323.31	16	16	16	16	15	15	16	15	15	16	15	15	1.2097	1.1196	23.907	62	0	1.8101	19.718	21	0	1.1794	26.019	20	0	1.0267	24.603	21	0	76.2	70.1	70.1
Q2FZ54	Q2FZ54	Malonyl CoA-acyl carrier protein transacylase	>tr|Q2FZ54|Q2FZ54_STAA8 Malonyl CoA-acyl carrier protein transacylase OS=Staphylococcus aureus (strain NCTC 8325) GN=SAOUHSC_01198 PE=3 SV=1	-0.188332	0.412233	0.00748262	-0.0420111	-0.530468		11	11	11	39.3	39.3	39.3	0	84.008	11	11	11	9	9	7	9	9	7	9	9	7	1.0168	0.98472	40.116	20	0	1.4243	41.998	6	0	0.9822	23.237	6	0	0.65732	38.193	8	0	39	36	33.4
Q2FZ55	Q2FZ55	Phosphate acyltransferase	>sp|Q2FZ55|PLSX_STAA8 Phosphate acyltransferase OS=Staphylococcus aureus (strain NCTC 8325) GN=plsX PE=3 SV=1	-0.0339415	0.482914	0.018919	-0.0640274	-0.0567163		5	5	5	21.3	21.3	21.3	0	8.4537	5	5	5	4	4	4	4	4	4	4	4	4	1.0307	0.96671	17.742	8	0	1.4723	84.098	4	2	0.96471	15.895	3	0	0.92698	28.514	3	0	15.2	17.1	17.1
Q2FZ58	Q2FZ58	Uncharacterized protein SAOUHSC_01193	>sp|Q2FZ58|Y1193_STAA8 Uncharacterized protein SAOUHSC_01193 OS=Staphylococcus aureus (strain NCTC 8325) GN=SAOUHSC_01193 PE=3 SV=1	0.114089	0.71239	0.0292761	0.228111	0.0848807		23	23	23	48	48	48	0	260.08	23	23	23	19	20	18	19	20	18	19	20	18	1.2293	1.0746	28.011	54	0	1.4866	31.412	18	0	1.2032	20.65	17	0	1.0546	31.077	19	0	42.7	44.7	44.2
Q2FZ59	Q2FZ59	Putative uncharacterized protein	>tr|Q2FZ59|Q2FZ59_STAA8 Putative uncharacterized protein OS=Staphylococcus aureus (strain NCTC 8325) GN=SAOUHSC_01192 PE=4 SV=1	0.101299	0.274228	-0.0851141	0.364124	0.024887		7	7	7	55.6	55.6	55.6	0	49.929	7	7	7	6	6	5	6	6	5	6	6	5	1.2921	1.2585	23.115	7	0	1.378	49.048	8	6	1.3395	6.3852	3	0	0.98408	56.64	6	4	55.6	55.6	55.6
Q2FZ60	Q2FZ60	50S ribosomal protein L28	>sp|Q2FZ60|RL28_STAA8 50S ribosomal protein L28 OS=Staphylococcus aureus (strain NCTC 8325) GN=rpmB PE=3 SV=1	-0.111962	0.549604	-0.100036	-0.250491	0.014641		7	7	7	41.9	41.9	41.9	0	11.347	7	7	7	5	6	7	5	6	7	5	6	7	1.0046	0.96357	31.951	14	0	1.3751	24.691	4	0	0.8651	29.091	6	0	0.95654	39.787	4	0	38.7	41.9	41.9
Q2FZ62	Q2FZ62	Ribulose-phosphate 3-epimerase	>tr|Q2FZ62|Q2FZ62_STAA8 Ribulose-phosphate 3-epimerase OS=Staphylococcus aureus (strain NCTC 8325) GN=SAOUHSC_01189 PE=3 SV=1	-0.0699663	0.260159	0.0117819	-0.151715	NaN		2	2	2	12.1	12.1	12.1	0	5.1281	2	2	2	2	2	1	2	2	1	2	2	1	0.8643	0.87235	10.75	3	0	1.4526	3.2219	2	1	0.9142	4.4404	2	1	NaN	NaN	1	0	12.1	12.1	3.7
Q2FZ64	Q2FZ64	Putative uncharacterized protein	>tr|Q2FZ64|Q2FZ64_STAA8 Putative uncharacterized protein OS=Staphylococcus aureus (strain NCTC 8325) GN=SAOUHSC_01187 PE=4 SV=1	0.0902347	0.0508303	0.165301	1.04502	-0.939621		10	10	10	19	19	19	0	28	10	10	10	6	6	6	6	6	6	6	6	6	1.0504	1.0041	62.813	5	0	1.523	21.334	2	0	2.083	41.265	3	2	0.49796	92.68	2	0	14.5	12.3	11.9
Q2FZ67	Q2FZ67	Ribosomal RNA small subunit methyltransferase B	>tr|Q2FZ67|Q2FZ67_STAA8 Ribosomal RNA small subunit methyltransferase B OS=Staphylococcus aureus (strain NCTC 8325) GN=SAOUHSC_01184 PE=4 SV=1	0.125876	0.336459	-0.0158555	-0.0104395	0.403922		5	5	5	12.4	12.4	12.4	0	9.9818	5	5	5	4	4	5	4	4	5	4	4	5	1.4001	1.0373	43.238	11	0	1.4428	28.423	4	0	0.99594	62.214	3	0	1.2732	45.795	4	0	8.5	10.3	12.4
Q2FZ68	Q2FZ68	Methionyl-tRNA formyltransferase	>sp|Q2FZ68|FMT_STAA8 Methionyl-tRNA formyltransferase OS=Staphylococcus aureus (strain NCTC 8325) GN=fmt PE=3 SV=1	0.402816	0.79043	0.637935	0.533763	0.0367495		7	7	7	36.3	36.3	36.3	0	33.483	7	7	7	5	3	6	5	3	6	5	3	6	0.7407	0.74508	72.858	4	0	2.1055	303.36	4	3	1.4593	59.209	3	2	0.95677	87.349	3	1	27.7	16.1	32.2
Q2FZ70	Q2FZ70	Orotate phosphoribosyltransferase	>tr|Q2FZ70|Q2FZ70_STAA8 Orotate phosphoribosyltransferase OS=Staphylococcus aureus (strain NCTC 8325) GN=pyrE PE=3 SV=1	0.217449	0.978647	0.336169	0.0740944	0.242084		5	5	5	42.4	42.4	42.4	0	116.35	5	5	5	5	5	5	5	5	5	5	5	5	1.1715	1.1819	23.334	17	0	1.8615	22.985	6	0	1.1007	18.078	5	0	1.1026	28.546	6	0	42.4	42.4	42.4
Q2FZ71	Q2FZ71	Orotidine 5-phosphate decarboxylase	>sp|Q2FZ71|PYRF_STAA8 Orotidine 5-phosphate decarboxylase OS=Staphylococcus aureus (strain NCTC 8325) GN=pyrF PE=3 SV=1	-0.108639	1.45472	-0.0992936	-0.148609	-0.0780154		8	8	8	51.7	51.7	51.7	0	56.559	8	8	8	8	7	8	8	7	8	8	7	8	1.0421	0.92614	22.046	27	0	1.3559	22.696	9	0	0.93044	10.63	8	0	0.90792	26.107	10	0	51.7	43.9	51.7
Q2FZ72	Q2FZ72	Carbamoyl-phosphate synthase large chain	>sp|Q2FZ72|CARB_STAA8 Carbamoyl-phosphate synthase large chain OS=Staphylococcus aureus (strain NCTC 8325) GN=carB PE=3 SV=1	0.0792145	0.723313	0.00115371	0.100036	0.136454		58	58	58	62.3	62.3	62.3	0	323.31	58	58	58	51	52	53	51	52	53	51	52	53	1.1851	1.0605	38.834	154	0	1.499	23.69	50	0	1.1447	52.025	51	0	1.0463	35.976	53	0	57.6	55.9	56
Q2FZ73	Q2FZ73	Carbamoyl-phosphate synthase small chain	>tr|Q2FZ73|Q2FZ73_STAA8 Carbamoyl-phosphate synthase small chain OS=Staphylococcus aureus (strain NCTC 8325) GN=carA PE=3 SV=1	0.125378	0.289485	0.439144	0.0153548	-0.0783656		12	12	12	38.8	38.8	38.8	0	83.367	12	12	12	9	10	11	9	10	11	9	10	11	1.0093	1.0117	20.952	18	0	1.8976	16.49	5	0	1.0391	12.782	5	0	0.90635	10.904	8	0	33.9	30.6	38.8
Q2FZ74	Q2FZ74	Dihydroorotase	>tr|Q2FZ74|Q2FZ74_STAA8 Dihydroorotase OS=Staphylococcus aureus (strain NCTC 8325) GN=pyrC PE=3 SV=1	-0.0392599	0.392804	-0.111945	-0.0187611	0.0129261		16	16	16	62.7	62.7	62.7	0	253.13	16	16	16	15	12	14	15	12	14	15	12	14	1.1034	0.9614	47.912	41	0	1.3914	15.689	13	0	1.0233	53.146	14	0	0.93963	60.59	14	0	60.4	41	51.4
Q2FZ75	Q2FZ75	Aspartate carbamoyltransferase	>sp|Q2FZ75|PYRB_STAA8 Aspartate carbamoyltransferase OS=Staphylococcus aureus (strain NCTC 8325) GN=pyrB PE=3 SV=1	0.0548537	1.16839	0.067088	0.072586	0.024887		18	18	18	57	57	57	0	193.86	18	18	18	14	17	18	14	17	18	14	17	18	1.1128	1.0273	47.225	46	0	1.4787	23.843	13	0	1.1128	49.044	16	0	0.98199	59.52	17	0	52.2	57	57
Q2FZ77	Q2FZ77	Bifunctional protein PyrR	>sp|Q2FZ77|PYRR_STAA8 Bifunctional protein PyrR OS=Staphylococcus aureus (strain NCTC 8325) GN=pyrR PE=3 SV=1	0.379801	0.246443	1.45912	-0.412462	0.0927488		7	7	7	52.6	52.6	52.6	0	31.671	7	7	7	6	3	5	6	3	5	6	3	5	1.2553	1.2214	73.619	10	8	3.9776	74.931	4	4	0.7632	76.905	2	2	0.99544	22.218	4	2	45.7	25.1	38.3
Q2FZ78	Q2FZ78	Pseudouridine synthase	>tr|Q2FZ78|Q2FZ78_STAA8 Pseudouridine synthase OS=Staphylococcus aureus (strain NCTC 8325) GN=SAOUHSC_01163 PE=3 SV=1	-0.0904219	0.0954452	0.191942	NaN	-0.372785		6	6	6	26.6	26.6	26.6	0	15.131	6	6	6	5	2	5	5	2	5	5	2	5	0.91746	0.94846	32.53	5	0	1.6172	28.31	4	2	NaN	NaN	1	0	0.7078	39.573	4	2	23.6	10.5	21.3
Q2FZ82	Q2FZ82	Isoleucine--tRNA ligase	>sp|Q2FZ82|SYI_STAA8 Isoleucine--tRNA ligase OS=Staphylococcus aureus (strain NCTC 8325) GN=ileS PE=3 SV=1	-0.107955	0.990038	-0.137029	-0.153238	-0.0335991		50	50	50	59.3	59.3	59.3	0	323.31	50	50	50	44	45	45	44	45	45	44	45	45	1.0906	0.91502	31.574	140	0	1.3634	23.555	47	0	0.94907	32.691	47	0	0.92112	36.771	46	0	50.9	54.3	53.2
Q2FZ83	Q2FZ83	Putative uncharacterized protein	>tr|Q2FZ83|Q2FZ83_STAA8 Putative uncharacterized protein OS=Staphylococcus aureus (strain NCTC 8325) GN=SAOUHSC_01158 PE=4 SV=1	-0.411319	0.523807	0.177727	-0.651473	-0.760211		4	4	4	25.9	25.9	25.9	0	58.515	4	4	4	4	3	3	4	3	3	4	3	3	1.1561	0.97722	44.67	7	0	1.5966	38.845	3	0	0.65964	56.771	3	1	0.57631	63.303	3	1	25.9	21	21
Q2FZ88	Q2FZ88	Laccase domain protein	>tr|Q2FZ88|Q2FZ88_STAA8 Laccase domain protein OS=Staphylococcus aureus (strain NCTC 8325) GN=SAOUHSC_01152 PE=3 SV=1	-0.144753	0.125806	0.622087	-0.68455	-0.371796		6	6	6	33	33	33	0	11.497	6	6	6	5	4	5	5	4	5	5	4	5	0.88596	0.84662	1.7408	3	0	2.0604	90.548	4	3	0.62503	147.9	5	4	0.72142	47.059	4	3	29.4	21.7	29.9
Q2FZ89	Q2FZ89	Cell division protein FtsZ	>sp|Q2FZ89|FTSZ_STAA8 Cell division protein FtsZ OS=Staphylococcus aureus (strain NCTC 8325) GN=ftsZ PE=3 SV=1	-0.0626223	0.0738026	0.397693	-0.568537	-0.0170229		23	23	23	64.9	64.9	64.9	0	323.31	23	23	23	19	19	23	19	19	23	19	19	23	0.94791	0.93468	57.303	64	0	1.8423	30.606	18	0	0.72001	31.166	22	0	0.94791	69.624	24	0	59.2	64.1	64.9
Q2FZ92	Q2FZ92	UDP-N-acetylmuramoylalanine--D-glutamate ligase	>sp|Q2FZ92|MURD_STAA8 UDP-N-acetylmuramoylalanine--D-glutamate ligase OS=Staphylococcus aureus (strain NCTC 8325) GN=murD PE=3 SV=1	0.0115786	0.0282927	-0.24139	0.186627	0.0894982		11	11	11	26.5	26.5	26.5	0	59.763	11	11	11	9	10	9	9	10	9	9	10	9	1.2059	1.0465	22.773	19	0	1.2146	18.847	6	0	1.094	12.247	5	0	1.0225	28.122	8	0	22.9	23.2	24.1
Q2FZ94	Q2FZ94	Penicillin-binding protein 1	>tr|Q2FZ94|Q2FZ94_STAA8 Penicillin-binding protein 1 OS=Staphylococcus aureus (strain NCTC 8325) GN=SAOUHSC_01145 PE=4 SV=1	0.136973	0.367918	0.246226	NaN	0.0277203		4	4	4	7.9	7.9	7.9	0	2.5408	4	4	4	4	1	2	4	1	2	4	1	2	1.0348	1.0194	9.6745	4	0	1.6125	38.74	2	1	NaN	NaN	1	0	0.94578	2.7828	2	0	7.9	0.9	2.6
Q2FZ97	Q2FZ97	Transcriptional regulator MraZ	>sp|Q2FZ97|MRAZ_STAA8 Transcriptional regulator MraZ OS=Staphylococcus aureus (strain NCTC 8325) GN=mraZ PE=3 SV=1	-0.124121	1.05095	NaN	-0.141573	-0.106669		2	2	2	14.7	14.7	14.7	0	8.4301	2	2	2	2	2	2	2	2	2	2	2	2	1.0108	1.0447	31.988	4	0	NaN	NaN	1	0	0.89323	30.311	3	2	0.8879	36.705	2	0	14.7	14.7	14.7
Q2FZA1	Q2FZA1	Uncharacterized N-acetyltransferase SAOUHSC_01138	>tr|Q2FZA1|Q2FZA1_STAA8 Uncharacterized N-acetyltransferase SAOUHSC_01138 OS=Staphylococcus aureus (strain NCTC 8325) GN=SAOUHSC_01138 PE=3 SV=1	-0.00810962	0.00519699	0.604925	-0.959009	0.329755		9	9	9	47.3	47.3	47.3	0	63.486	9	9	9	9	8	9	9	8	9	9	8	9	1.2066	1.1426	75.155	21	0	2.2261	10.356	5	0	0.53993	46.294	7	0	1.2489	88.807	9	0	47.3	47.3	47.3
Q2FZA8	Q2FZA8	Putative uncharacterized protein	>tr|Q2FZA8|Q2FZA8_STAA8 Putative uncharacterized protein OS=Staphylococcus aureus (strain NCTC 8325) GN=SAOUHSC_01130 PE=4 SV=1	-0.1767	0.596697	NaN	-0.102496	-0.250903		2	2	2	4.6	4.6	4.6	0	8.5185	2	2	2	2	2	2	2	2	2	2	2	2	1.0867	0.89472	34.329	6	5	NaN	NaN	1	0	0.9503	26.887	3	3	0.79807	63.088	2	2	4.6	4.6	4.6
Q2FZC2	Q2FZC2	Fibrinogen-binding protein-related	>tr|Q2FZC2|Q2FZC2_STAA8 Fibrinogen-binding protein-related OS=Staphylococcus aureus (strain NCTC 8325) GN=SAOUHSC_01110 PE=4 SV=1	-0.299033	0.555678	0.0756011	-0.352032	-0.620667		2	2	2	18.3	18.3	18.3	0	27.803	2	2	2	2	2	2	2	2	2	2	2	2	0.88344	0.90069	27.646	4	0	1.3913	27.961	2	1	0.80585	25.191	2	0	0.6057	40.574	2	1	18.3	18.3	18.3
Q2FZC5	Q2FZC5	Non-canonical purine NTP pyrophosphatase	>tr|Q2FZC5|Q2FZC5_STAA8 Non-canonical purine NTP pyrophosphatase OS=Staphylococcus aureus (strain NCTC 8325) GN=SAOUHSC_01107 PE=3 SV=1	-0.331504	0.431059	0.00834347	-0.907251	-0.0956045		4	4	4	30.8	30.8	30.8	0	52.03	4	4	4	3	3	4	3	3	4	3	3	4	1.0889	1.0008	31.194	5	0	1.4	0.71022	2	0	0.55952	67.747	4	3	0.88498	59.076	4	2	23.6	25.1	30.8
Q2FZC6	Q2FZC6	Glutamate racemase	>sp|Q2FZC6|MURI_STAA8 Glutamate racemase OS=Staphylococcus aureus (strain NCTC 8325) GN=murI PE=3 SV=1	-0.149735	0.255353	0.146655	-0.0321084	-0.563753		10	10	10	45.9	45.9	45.9	0	52.647	10	10	10	7	7	8	7	7	8	7	7	8	1.1411	0.97799	38.195	12	0	1.5937	18.182	3	0	0.9928	31.888	4	0	0.63835	55.241	5	0	34.2	39.5	42.9
Q2FZC7	Q2FZC7	Iron-sulphur subunit of succinate dehydrogenase, putative	>tr|Q2FZC7|Q2FZC7_STAA8 Iron-sulphur subunit of succinate dehydrogenase, putative OS=Staphylococcus aureus (strain NCTC 8325) GN=SAOUHSC_01105 PE=4 SV=1	-0.0606061	0.416578	-0.018162	0.0054719	-0.169128		17	17	17	57.9	57.9	57.9	0	164.16	17	17	17	13	15	16	13	15	16	13	15	16	1.182	0.99133	41.676	48	0	1.3868	37.252	17	0	1.0643	38.826	16	0	0.82488	50.332	15	0	57.2	48.3	48.3
Q2FZC8	Q2FZC8	Succinate dehydrogenase, flavoprotein chain TC0881, putative	>tr|Q2FZC8|Q2FZC8_STAA8 Succinate dehydrogenase, flavoprotein chain TC0881, putative OS=Staphylococcus aureus (strain NCTC 8325) GN=SAOUHSC_01104 PE=4 SV=1	-0.0266128	0.164324	0.0497701	-0.137378	0.00776951		45	45	45	81	81	81	0	323.31	45	45	45	41	35	36	41	35	36	41	35	36	1.0673	0.99288	40.233	106	0	1.5258	34.347	39	0	0.93945	32.38	34	0	0.92438	52.596	33	0	70.7	70.4	73.3
Q2FZC9	Q2FZC9	Succinate dehydrogenase cytochrome b-558 subunit, putative	>tr|Q2FZC9|Q2FZC9_STAA8 Succinate dehydrogenase cytochrome b-558 subunit, putative OS=Staphylococcus aureus (strain NCTC 8325) GN=SAOUHSC_01103 PE=4 SV=1	-0.628024	0.624812	-0.902713	-1.09786	0.116498		4	4	4	5.9	5.9	5.9	0	3.3614	4	4	4	4	3	2	4	3	2	4	3	2	0.69747	0.48981	36.651	10	0	0.77415	12.614	4	0	0.4643	3.0886	4	0	1.0119	12.96	3	1	5.9	5.4	5.4
Q2FZD2	Q2FZD2	Thioredoxin	>sp|Q2FZD2|THIO_STAA8 Thioredoxin OS=Staphylococcus aureus (strain NCTC 8325) GN=trxA PE=2 SV=1	-0.245716	0.239287	0.258097	-0.970639	-0.0246046		9	9	9	68.3	68.3	68.3	0	183.43	9	9	9	7	7	9	7	7	9	7	7	9	1.1709	0.97894	44.308	16	0	1.7924	18.86	6	0	0.53842	44.245	5	0	0.93844	38.35	5	0	59.6	55.8	68.3
Q2FZD8	Q2FZD8	Phenylalanine--tRNA ligase beta subunit	>tr|Q2FZD8|Q2FZD8_STAA8 Phenylalanine--tRNA ligase beta subunit OS=Staphylococcus aureus (strain NCTC 8325) GN=pheT PE=3 SV=1	-0.0598612	0.548035	0.0201999	-0.11652	-0.0832635		29	29	29	43.6	43.6	43.6	0	277.62	29	29	29	18	21	28	18	21	28	18	21	28	1.0287	0.94919	44.842	38	0	1.3936	23.361	10	0	0.95658	51.604	11	0	0.92209	50.071	17	0	30.9	33.5	43.6
Q2FZD9	Q2FZD9	Phenylalanine--tRNA ligase alpha subunit	>sp|Q2FZD9|SYFA_STAA8 Phenylalanine--tRNA ligase alpha subunit OS=Staphylococcus aureus (strain NCTC 8325) GN=pheS PE=3 SV=1	0.0040379	0.0133436	-0.0847468	-0.0957124	0.192573		10	10	10	36.9	36.9	36.9	0	97.139	10	10	10	9	7	5	9	7	5	9	7	5	1.1189	0.97125	20.549	14	0	1.3494	13.359	5	0	0.91395	22.948	5	0	1.0903	19.734	4	0	33.2	25.3	14.2
Q2FZE9	Q2FZE9	Iron-regulated surface determinant protein A	>sp|Q2FZE9|ISDA_STAA8 Iron-regulated surface determinant protein A OS=Staphylococcus aureus (strain NCTC 8325) GN=isdA PE=1 SV=1	0.124915	0.177241	-0.331209	0.182692	0.523261		8	8	8	26.9	26.9	26.9	0	177.11	8	8	8	6	5	8	6	5	8	6	5	8	1.189	0.99591	28.408	12	0	1.1419	8.6377	4	0	1.1318	19.27	4	0	1.3701	26.058	4	0	19.7	14.6	26.9
Q2FZF3	Q2FZF3	Putative uncharacterized protein	>tr|Q2FZF3|Q2FZF3_STAA8 Putative uncharacterized protein OS=Staphylococcus aureus (strain NCTC 8325) GN=SAOUHSC_01077 PE=4 SV=1	-0.205433	0.228913	-0.479331	0.0684644	NaN		1	1	1	4.9	4.9	4.9	0.0045704	1.436	1	1	1	1	1	1	1	1	1	1	1	1	1.6157	1.3286	68.912	5	5	0.97132	87.17	2	2	1.0566	59.515	2	2	NaN	NaN	1	1	4.9	4.9	4.9
Q2FZG4	Q2FZG4	Pyruvate dehydrogenase complex, E1 component, alpha subunit, putative	>tr|Q2FZG4|Q2FZG4_STAA8 Pyruvate dehydrogenase complex, E1 component, alpha subunit, putative OS=Staphylococcus aureus (strain NCTC 8325) GN=SAOUHSC_01040 PE=4 SV=1	-0.541908	0.544673	0.198871	-1.01403	-0.810561		18	18	18	50.5	50.5	50.5	0	323.31	18	18	18	17	17	17	17	17	17	17	17	17	0.65574	0.66786	60.955	65	0	1.6778	38.531	24	0	0.53287	29.879	19	0	0.54719	71.316	22	0	50.5	50.5	48.1
Q2FZG6	Q2FZG6	Peptide deformylase	>tr|Q2FZG6|Q2FZG6_STAA8 Peptide deformylase OS=Staphylococcus aureus (strain NCTC 8325) GN=def PE=3 SV=1	-0.0227542	0.0825198	0.105008	0.0270125	-0.200283		13	13	13	67.8	67.8	67.8	0	104.21	13	13	13	11	7	9	11	7	9	11	7	9	1.1946	1.0165	16.598	17	0	1.5596	14.538	6	0	1.0402	11.916	6	0	0.84278	22.803	5	0	67.8	32.8	44.3
Q2FZG8	Q2FZG8	UPF0356 protein SAOUHSC_01036	>sp|Q2FZG8|Y1036_STAA8 UPF0356 protein SAOUHSC_01036 OS=Staphylococcus aureus (strain NCTC 8325) GN=SAOUHSC_01036 PE=3 SV=1	-0.382387	0.348941	0.368042	-1.03605	-0.47915		6	6	6	88.9	88.9	88.9	0	12.76	6	6	6	5	4	6	5	4	6	5	4	6	0.9355	0.87218	53.329	14	0	1.9615	42.371	5	0	0.52789	17.203	3	0	0.68921	41.962	6	0	88.9	63.9	88.9
Q2FZG9	Q2FZG9	Ribonuclease J 1	>sp|Q2FZG9|RNJ1_STAA8 Ribonuclease J 1 OS=Staphylococcus aureus (strain NCTC 8325) GN=rnj1 PE=1 SV=1	-0.00777889	0.0751601	0.0342158	-0.0754744	0.017922		21	21	21	45.7	45.7	45.7	0	112.33	21	21	21	19	19	19	19	19	19	19	19	19	1.0669	1.0091	28.422	46	0	1.465	37.124	16	0	0.95598	21.953	15	0	0.98726	24.159	15	0	42.5	40.7	42.1
Q2FZH3	Q2FZH3	Cytochrome d ubiquinol oxidase, subunit I, putative	>tr|Q2FZH3|Q2FZH3_STAA8 Cytochrome d ubiquinol oxidase, subunit I, putative OS=Staphylococcus aureus (strain NCTC 8325) GN=SAOUHSC_01031 PE=4 SV=1	-1.25213	0.358165	-3.85628	-0.082805	0.182692		2	2	2	3.5	3.5	3.5	0.0046339	1.5191	2	2	2	2	2	2	2	2	2	2	2	2	1.0291	1.1174	10.303	5	0	0.10143	396.67	2	1	0.99277	2.299	2	0	1.0519	2.2117	2	0	3.5	3.5	3.5
Q2FZH5	Q2FZH5	Phosphoenolpyruvate-protein phosphotransferase	>tr|Q2FZH5|Q2FZH5_STAA8 Phosphoenolpyruvate-protein phosphotransferase OS=Staphylococcus aureus (strain NCTC 8325) GN=SAOUHSC_01029 PE=3 SV=1	0.0152897	0.305249	-0.0195213	0.0434844	0.0219061		33	33	33	56.8	56.8	56.8	0	323.31	33	33	33	25	28	28	25	28	28	25	28	28	1.1565	1.0163	26.935	64	0	1.4854	20.382	22	0	1.1263	32.079	22	0	0.95475	28.399	20	0	44.6	51.7	55.6
Q2FZH6	Q2FZH6	Phosphocarrier protein hpr, putative	>tr|Q2FZH6|Q2FZH6_STAA8 Phosphocarrier protein hpr, putative OS=Staphylococcus aureus (strain NCTC 8325) GN=SAOUHSC_01028 PE=4 SV=1	-0.378608	0.237549	0.763072	-1.08654	-0.812359		5	5	5	88.6	88.6	88.6	0	70.625	5	5	5	5	3	4	5	3	4	5	3	4	0.68405	0.63409	63.611	11	0	2.4636	22.588	4	0	0.49437	29.874	3	0	0.54714	30.809	4	0	88.6	45.5	59.1
Q2FZH8	Q2FZH8	Putative uncharacterized protein	>tr|Q2FZH8|Q2FZH8_STAA8 Putative uncharacterized protein OS=Staphylococcus aureus (strain NCTC 8325) GN=SAOUHSC_01026 PE=4 SV=1	-0.0416675	0.070535	-0.426567	0.197362	0.104202		6	6	6	22.3	22.3	22.3	0	11.465	6	6	6	2	6	3	2	6	3	2	6	3	1.2386	1.1466	18.065	5	0	1.0145	45.744	2	1	1.1302	19.83	3	1	1.0308	16.499	3	1	5.9	22.3	7.9
Q2FZI5	Q2FZI5	Phosphoribosylamine--glycine ligase	>tr|Q2FZI5|Q2FZI5_STAA8 Phosphoribosylamine--glycine ligase OS=Staphylococcus aureus (strain NCTC 8325) GN=purD PE=3 SV=1	0.0373106	0.0727982	0.374177	-0.109312	-0.152933		6	6	6	19.8	19.8	19.8	0	7.5684	6	6	6	4	4	6	4	4	6	4	4	6	0.97045	0.93424	22.887	6	0	1.7752	23.172	3	1	0.92611	25.228	4	2	0.85152	51.804	6	4	11.3	11.6	19.8
Q2FZI6	Q2FZI6	Bifunctional purine biosynthesis protein PurH	>sp|Q2FZI6|PUR9_STAA8 Bifunctional purine biosynthesis protein PurH OS=Staphylococcus aureus (strain NCTC 8325) GN=purH PE=3 SV=1	-0.0761384	2.59844	-0.0820565	-0.0689675	-0.0773911		19	19	19	43.7	43.7	43.7	0	118.99	19	19	19	13	11	14	13	11	14	13	11	14	1.057	0.94471	24.192	27	0	1.4171	16.322	9	0	0.97989	22.667	8	0	0.90125	31.961	10	0	30.9	29.1	33.3
Q2FZI8	Q2FZI8	Phosphoribosylformylglycinamidine cyclo-ligase	>sp|Q2FZI8|PUR5_STAA8 Phosphoribosylformylglycinamidine cyclo-ligase OS=Staphylococcus aureus (strain NCTC 8325) GN=purM PE=3 SV=1	0.141394	0.483049	-0.0478901	0.334568	0.137504		4	4	4	16.1	16.1	16.1	0	20.76	4	4	4	3	3	3	3	3	3	3	3	3	1.1725	1.0192	10.862	6	0	1.406	27.177	3	1	1.2591	20.175	3	1	1.0497	10.533	3	1	12.9	12.9	13.5
Q2FZI9	Q2FZI9	Amidophosphoribosyltransferase	>tr|Q2FZI9|Q2FZI9_STAA8 Amidophosphoribosyltransferase OS=Staphylococcus aureus (strain NCTC 8325) GN=purF PE=3 SV=1	0.0361967	0.507047	0.0129261	0.0899048	0.0057592		17	17	17	36.4	36.4	36.4	0	237.97	17	17	17	13	15	16	13	15	16	13	15	16	1.203	1.0269	22.639	45	0	1.3791	16.161	16	0	1.0945	22.752	14	0	0.95345	28.865	15	0	26.3	35	28.1
Q2FZJ0	Q2FZJ0	Phosphoribosylformylglycinamidine synthase subunit PurL	>sp|Q2FZJ0|PURL_STAA8 Phosphoribosylformylglycinamidine synthase subunit PurL OS=Staphylococcus aureus (strain NCTC 8325) GN=purL PE=3 SV=1	0.2882	1.39087	0.190046	0.277628	0.396927		13	13	13	25.2	25.2	25.2	0	74.938	13	13	13	7	10	10	7	10	10	7	10	10	1.2453	1.2447	31.745	20	0	1.6542	53.048	5	0	1.2243	24.124	7	0	1.2393	18.479	8	0	15.1	21.3	19.8
Q2FZJ3	Q2FZJ3	Phosphoribosylaminoimidazole-succinocarboxamide synthase	>sp|Q2FZJ3|PUR7_STAA8 Phosphoribosylaminoimidazole-succinocarboxamide synthase OS=Staphylococcus aureus (strain NCTC 8325) GN=purC PE=3 SV=1	-0.135388	0.337122	-0.127589	0.119157	-0.397733		8	8	8	38.9	38.9	38.9	0	25.762	8	8	8	6	4	5	6	4	5	6	4	5	1.1946	0.93213	51.77	8	0	1.2969	60	5	0	1.0957	32.708	4	2	0.71013	67.412	5	4	31.2	21.4	26.5
Q2FZJ4	Q2FZJ4	N5-carboxyaminoimidazole ribonucleotide synthase	>tr|Q2FZJ4|Q2FZJ4_STAA8 N5-carboxyaminoimidazole ribonucleotide synthase OS=Staphylococcus aureus (strain NCTC 8325) GN=purK PE=3 SV=1	0.106408	0.322836	-0.0661404	0.342441	0.0429245		9	9	9	26.2	26.2	26.2	0	23.283	9	9	9	7	6	5	7	6	5	7	6	5	1.2566	1.0255	20.392	8	0	1.3103	13.634	3	0	1.2854	64.011	6	4	0.97686	25.195	3	0	21.4	15.2	13.9
Q2FZJ5	Q2FZJ5	N5-carboxyaminoimidazole ribonucleotide mutase	>tr|Q2FZJ5|Q2FZJ5_STAA8 N5-carboxyaminoimidazole ribonucleotide mutase OS=Staphylococcus aureus (strain NCTC 8325) GN=purE PE=3 SV=1	-0.730638	1.63886	-0.947834	-0.569972	-0.674107		3	3	3	17.3	17.3	17.3	0	4.0993	3	3	3	2	3	2	2	3	2	2	3	2	0.67587	0.62036	54.089	10	8	0.72514	62.066	3	2	0.6897	54.598	4	4	0.5859	66.102	3	2	15.8	17.3	15.8
Q2FZJ6	Q2FZJ6	Bifunctional protein FolD	>sp|Q2FZJ6|FOLD_STAA8 Bifunctional protein FolD OS=Staphylococcus aureus (strain NCTC 8325) GN=folD PE=3 SV=1	0.0799112	0.578292	0.140779	-0.0235191	0.122474		13	13	13	49	49	49	0	225.62	13	13	13	10	12	12	10	12	12	10	12	12	1.1778	1.0653	13.986	34	0	1.67	15.563	11	0	1.0404	11.818	12	0	1.0551	14.698	11	0	43.4	49	45.8
Q2FZJ9	Q2FZJ9	Probable quinol oxidase subunit 2	>sp|Q2FZJ9|QOX2_STAA8 Probable quinol oxidase subunit 2 OS=Staphylococcus aureus (strain NCTC 8325) GN=qoxA PE=3 SV=1	-0.0181734	0.0372794	0.291721	-0.146771	-0.199471		24	24	24	52.2	52.2	52.2	0	247.55	24	24	24	19	20	21	19	20	21	19	20	21	0.9692	0.97371	29.479	55	0	1.7851	20.72	17	0	0.94862	23.578	18	0	0.82063	23.139	20	0	51.6	48.4	48.4
Q2FZK0	Q2FZK0	Probable quinol oxidase subunit 1	>sp|Q2FZK0|QOX1_STAA8 Probable quinol oxidase subunit 1 OS=Staphylococcus aureus (strain NCTC 8325) GN=qoxB PE=3 SV=1	-0.228531	0.685697	0.018919	-0.360268	-0.344245		8	8	8	13.1	13.1	13.1	0	130.32	8	8	8	8	8	8	8	8	8	8	8	8	0.9555	0.84627	43.141	27	0	1.5406	52.026	8	0	0.7513	34.245	9	0	0.75095	34.307	10	0	13.1	13.1	13.1
Q2FZK3	Q2FZK3	Protein FmtA	>sp|Q2FZK3|FMTA_STAA8 Protein FmtA OS=Staphylococcus aureus (strain NCTC 8325) GN=fmtA PE=2 SV=1	0.11259	0.085934	0.50121	NaN	-0.276031		3	3	3	6.5	6.5	6.5	0	2.2671	3	3	3	2	1	2	2	1	2	2	1	2	1.0734	1.0974	19.604	3	0	1.8749	1.9837	2	1	NaN	NaN	1	0	0.7809	24.196	2	1	4.3	2.3	4.3
Q2FZK7	Q2FZK7	Bifunctional autolysin	>sp|Q2FZK7|ATL_STAA8 Bifunctional autolysin OS=Staphylococcus aureus (strain NCTC 8325) GN=atl PE=1 SV=1	0.0225093	0.04311	0.059909	0.292428	-0.284809		39	39	39	40	40	40	0	277.25	39	39	39	30	34	26	30	34	26	30	34	26	1.1279	1.0376	26.084	48	0	1.4931	16.041	14	0	1.2355	25.324	18	0	0.76316	19.985	16	0	31.8	37.5	25.2
Q2FZL5	Q2FZL5	1,4-dihydroxy-2-naphthoyl-CoA synthase	>tr|Q2FZL5|Q2FZL5_STAA8 1,4-dihydroxy-2-naphthoyl-CoA synthase OS=Staphylococcus aureus (strain NCTC 8325) GN=menB PE=3 SV=1	-0.0279459	0.0955139	0.123931	0.00374607	-0.211515		20	20	20	67	67	67	0	160.3	20	20	20	15	14	17	15	14	17	15	14	17	1.0575	1.018	34.882	41	0	1.5984	26.633	13	0	1.0527	32.1	13	0	0.83325	42.203	15	0	63	54.6	63
Q2FZL7	Q2FZL7	2-succinyl-5-enolpyruvyl-6-hydroxy-3-cyclohexene-1-carboxylate synthase	>sp|Q2FZL7|MEND_STAA8 2-succinyl-5-enolpyruvyl-6-hydroxy-3-cyclohexene-1-carboxylate synthase OS=Staphylococcus aureus (strain NCTC 8325) GN=menD PE=3 SV=1	-0.207046	0.294528	-0.700333	-0.0958512	0.175045		8	8	8	15.1	15.1	15.1	0	8.0858	8	8	8	4	7	5	4	7	5	4	7	5	0.94935	0.93016	26.738	9	0	0.86453	35.844	3	0	0.96561	13.322	4	0	1.1109	43.483	3	1	9.7	14	10.8
Q2FZL8	Q2FZL8	Putative uncharacterized protein	>tr|Q2FZL8|Q2FZL8_STAA8 Putative uncharacterized protein OS=Staphylococcus aureus (strain NCTC 8325) GN=SAOUHSC_00982 PE=4 SV=1	-0.143554	1.23425	-0.0774216	-0.202439	-0.150801		7	7	7	24.6	24.6	24.6	0	34.722	7	7	7	4	6	6	4	6	6	4	6	6	0.90187	0.88736	23.443	7	0	1.3906	40.19	3	0	0.88154	44.937	5	3	0.85317	114.66	6	4	11.4	21.6	18.1
Q2FZM0	Q2FZM0	1,4-dihydroxy-2-naphthoate octaprenyltransferase	>tr|Q2FZM0|Q2FZM0_STAA8 1,4-dihydroxy-2-naphthoate octaprenyltransferase OS=Staphylococcus aureus (strain NCTC 8325) GN=menA PE=3 SV=1	-0.0284781	0.0763146	-0.138569	NaN	0.0816123		3	3	3	6.4	6.4	6.4	0	7.3751	3	3	3	3	1	2	3	1	2	3	1	2	1.1023	0.90842	21.35	4	0	1.1689	14.094	2	0	NaN	NaN	1	0	1.0426	11.546	2	1	6.4	3.5	3.8
Q2FZM1	Q2FZM1	Putative uncharacterized protein	>tr|Q2FZM1|Q2FZM1_STAA8 Putative uncharacterized protein OS=Staphylococcus aureus (strain NCTC 8325) GN=SAOUHSC_00979 PE=4 SV=1	-0.167506	0.462026	0.040682	-0.118163	-0.425036		7	7	7	38.8	38.8	38.8	0	53.192	7	7	7	5	6	7	5	6	7	5	6	7	0.95273	0.82255	39.599	11	0	1.5054	27.301	3	0	0.97717	23.295	3	0	0.69828	54.624	5	0	31.1	38.8	38.8
Q2FZM6	Q2FZM6	Glycosyl transferase, group 1	>tr|Q2FZM6|Q2FZM6_STAA8 Glycosyl transferase, group 1 OS=Staphylococcus aureus (strain NCTC 8325) GN=SAOUHSC_00974 PE=4 SV=1	0.0276145	0.103697	NaN	0.107286	-0.0520572		5	5	5	17.7	17.7	17.7	0	10.35	5	5	5	2	4	4	2	4	4	2	4	4	0.97534	0.98448	27.282	5	0	NaN	NaN	1	1	1.1205	38.525	3	0	0.93218	65.77	4	2	9.6	14.2	16.2
Q2FZN7	Q2FZN7	Lipoate--protein ligase	>tr|Q2FZN7|Q2FZN7_STAA8 Lipoate--protein ligase OS=Staphylococcus aureus (strain NCTC 8325) GN=SAOUHSC_00963 PE=4 SV=1	0.0644133	0.263356	0.214249	-0.0944181	0.0734089		12	12	12	50.9	50.9	50.9	0	288.91	12	12	12	7	9	10	7	9	10	7	9	10	1.0341	0.9703	36.927	26	0	1.7384	31.703	8	0	0.97922	11.811	9	0	1.0271	51.242	9	0	39.6	37.8	50.9
Q2FZP0	Q2FZP0	Putative uncharacterized protein	>tr|Q2FZP0|Q2FZP0_STAA8 Putative uncharacterized protein OS=Staphylococcus aureus (strain NCTC 8325) GN=SAOUHSC_00960 PE=4 SV=1	-0.0111949	0.0186022	0.32987	-0.0420854	-0.321369		7	7	7	21.7	21.7	21.7	0	23.021	7	7	7	5	5	3	5	5	3	5	5	3	1.0717	1.0002	31.361	10	8	1.742	21.948	4	3	0.97487	34.939	4	4	0.75746	23.793	2	1	16.9	12.5	7.8
Q2FZP6	Q2FZP6	UDP-N-acetylmuramoyl-L-alanyl-D-glutamate--L-lysine ligase	>sp|Q2FZP6|MURE_STAA8 UDP-N-acetylmuramoyl-L-alanyl-D-glutamate--L-lysine ligase OS=Staphylococcus aureus (strain NCTC 8325) GN=murE PE=1 SV=1	-0.0134973	0.0664302	-0.077589	0.119688	-0.0825911		15	15	15	38.3	38.3	38.3	0	54.085	15	15	15	12	10	9	12	10	9	12	10	9	1.0916	0.98626	18.76	12	0	1.3445	21.611	4	0	1.0704	20.804	5	0	0.87596	7.9048	3	0	31	27.8	24.9
Q2FZP9	Q2FZP9	Putative phosphoesterase SAOUHSC_00951	>sp|Q2FZP9|Y951_STAA8 Putative phosphoesterase SAOUHSC_00951 OS=Staphylococcus aureus (strain NCTC 8325) GN=SAOUHSC_00951 PE=3 SV=1	0.000946502	0.000813648	0.642378	-0.593616	-0.0459228		10	10	10	56.8	56.8	56.8	0	82.56	10	10	10	9	8	9	9	8	9	9	8	9	0.96705	0.96867	89.186	24	0	2.1478	32.552	9	0	0.68763	29.222	7	0	0.92607	134.74	8	0	56.8	56.8	56.8
Q2FZQ3	Q2FZQ3	Enoyl-[acyl-carrier-protein] reductase [NADPH] FabI	>sp|Q2FZQ3|FABI_STAA8 Enoyl-[acyl-carrier-protein] reductase [NADPH] FabI OS=Staphylococcus aureus (strain NCTC 8325) GN=fabI PE=1 SV=1	-0.0781643	0.14951	0.194844	-0.42196	-0.00737659		15	15	15	65.6	65.6	65.6	0	117.19	15	15	15	13	12	13	13	12	13	13	12	13	1.0411	0.96467	45.094	36	0	1.7079	34.779	11	0	0.7707	26.371	12	0	0.94376	51.482	13	0	65.6	62.5	60.9
Q2FZQ4	Q2FZQ4	Putative uncharacterized protein	>tr|Q2FZQ4|Q2FZQ4_STAA8 Putative uncharacterized protein OS=Staphylococcus aureus (strain NCTC 8325) GN=SAOUHSC_00946 PE=4 SV=1	-0.281487	1.09252	-0.123151	-0.415557	-0.305753		13	13	13	22.3	22.3	22.3	0	40.031	13	13	13	13	8	6	13	8	6	13	8	6	0.98623	0.83269	32.92	19	0	1.3585	32.497	9	0	0.79286	33.995	5	0	0.7934	29.151	5	0	22.3	17.6	9.6
Q2FZQ5	Q2FZQ5	Magnesium transporter MgtE	>tr|Q2FZQ5|Q2FZQ5_STAA8 Magnesium transporter MgtE OS=Staphylococcus aureus (strain NCTC 8325) GN=SAOUHSC_00945 PE=3 SV=1	-0.300123	0.85617	-0.461025	-0.0528201	-0.386525		8	8	8	25.6	25.6	25.6	0	116.68	8	8	8	8	6	5	8	6	5	8	6	5	0.98283	0.83624	32.84	12	0	1.0559	38.738	5	0	1.0084	34.384	4	0	0.75246	25.613	3	0	25.6	20	16.1
Q2FZQ7	Q2FZQ7	Tryptophan--tRNA ligase	>tr|Q2FZQ7|Q2FZQ7_STAA8 Tryptophan--tRNA ligase OS=Staphylococcus aureus (strain NCTC 8325) GN=trpS PE=3 SV=1	-0.354832	0.452919	0.0766959	-0.221522	-0.91967		8	8	8	30.1	30.1	30.1	0	12.995	8	8	8	7	6	5	7	6	5	7	6	5	1.0592	1.0351	33.91	8	0	1.5331	27.793	3	0	0.88231	17.664	3	0	0.5026	58.791	4	2	26.1	24	20.7
Q2FZR9	Q2FZR9	3-oxoacyl-[acyl-carrier-protein] synthase 2	>tr|Q2FZR9|Q2FZR9_STAA8 3-oxoacyl-[acyl-carrier-protein] synthase 2 OS=Staphylococcus aureus (strain NCTC 8325) GN=SAOUHSC_00921 PE=3 SV=1	0.085639	0.471653	0.195348	0.101784	-0.040215		17	17	17	53.4	53.4	53.4	0	215.19	17	17	17	13	14	16	13	14	16	13	14	16	1.1196	1.0543	33.668	37	0	1.707	29.361	12	0	1.1065	26.236	12	0	0.93443	42.702	13	0	46.1	43.7	53.4
Q2FZS0	Q2FZS0	3-oxoacyl-[acyl-carrier-protein] synthase 3	>sp|Q2FZS0|FABH_STAA8 3-oxoacyl-[acyl-carrier-protein] synthase 3 OS=Staphylococcus aureus (strain NCTC 8325) GN=fabH PE=3 SV=1	0.78204	4.10197	0.768333	0.790939	0.786847		8	8	8	32.6	32.6	32.6	0	131.48	8	8	8	6	7	7	6	7	7	6	7	7	2.2935	1.7142	32.267	16	0	2.4836	16.25	5	0	1.8497	35.464	6	0	1.5854	45.457	5	0	22.7	32.6	32.6
Q2FZS8	Q2FZS8	Chaperone protein ClpB	>tr|Q2FZS8|Q2FZS8_STAA8 Chaperone protein ClpB OS=Staphylococcus aureus (strain NCTC 8325) GN=clpB PE=3 SV=1	0.0399085	0.35335	-0.0434228	0.0920721	0.0710762		39	36	36	53.7	51.1	51.1	0	244.63	39	36	36	36	34	29	33	31	26	33	31	26	1.1211	1.0468	24.042	66	0	1.4284	23.575	22	0	1.0863	24.118	24	0	1.0055	25.537	20	0	50.6	50.4	44.2
Q2FZT1	Q2FZT1	Putative uncharacterized protein	>tr|Q2FZT1|Q2FZT1_STAA8 Putative uncharacterized protein OS=Staphylococcus aureus (strain NCTC 8325) GN=SAOUHSC_00909 PE=4 SV=1	-0.105999	0.46899	0.0630888	-0.171807	-0.209278		9	9	9	42.3	42.3	42.3	0	131.76	9	9	9	8	8	9	8	8	9	8	8	9	1.079	0.91805	32.388	19	0	1.5083	15.494	6	0	0.93322	25.228	6	0	0.83273	44.43	7	0	38.3	38.3	42.3
Q2FZT4	Q2FZT4	Uncharacterized protein SAOUHSC_00906	>sp|Q2FZT4|Y906_STAA8 Uncharacterized protein SAOUHSC_00906 OS=Staphylococcus aureus (strain NCTC 8325) GN=SAOUHSC_00906 PE=3 SV=1	-0.0656494	0.253865	0.0647449	-0.0134653	-0.248228		22	22	22	82.3	82.3	82.3	0	323.31	22	22	22	20	21	21	20	21	21	20	21	21	1.0706	0.98794	24.407	76	0	1.4943	17.062	25	0	1.0516	28.614	24	0	0.83119	26.027	27	0	74	82.3	82.3
Q2FZT5	Q2FZT5	ATP-dependent helicase/nuclease subunit A	>sp|Q2FZT5|ADDA_STAA8 ATP-dependent helicase/nuclease subunit A OS=Staphylococcus aureus (strain NCTC 8325) GN=addA PE=3 SV=1	-0.0796816	0.107516	0.230818	-0.575809	0.105946		17	17	17	17.5	17.5	17.5	0	34.704	17	17	17	11	11	10	11	11	10	11	11	10	0.89777	0.93698	32.802	7	0	1.5858	42.318	7	7	0.66136	36.398	5	0	1.0104	38.682	8	6	11.6	12.3	11.3
Q2FZT6	Q2FZT6	ATP-dependent helicase/deoxyribonuclease subunit B	>sp|Q2FZT6|ADDB_STAA8 ATP-dependent helicase/deoxyribonuclease subunit B OS=Staphylococcus aureus (strain NCTC 8325) GN=addB PE=3 SV=1	0.15638	0.947329	0.145873	0.260869	0.062398		11	11	11	11.8	11.8	11.8	0	41.295	11	11	11	4	8	10	4	8	10	4	8	10	1.1415	1.1064	17.563	13	0	1.4732	15.439	3	0	1.2185	16.618	4	0	0.97817	18.924	6	0	4	8.4	10.6
Q2FZU0	Q2FZU0	Glucose-6-phosphate isomerase	>sp|Q2FZU0|G6PI_STAA8 Glucose-6-phosphate isomerase OS=Staphylococcus aureus (strain NCTC 8325) GN=pgi PE=3 SV=1	0.0841589	1.46606	0.067501	0.116098	0.0688772		32	32	32	65.5	65.5	65.5	0	323.31	32	32	32	26	29	32	26	29	32	26	29	32	1.1889	1.0617	34.988	111	0	1.5954	32.651	35	0	1.1395	27.57	38	0	0.99662	43.487	38	0	63.4	64.8	65.5
Q2FZU5	Q2FZU5	Glutamate dehydrogenase	>tr|Q2FZU5|Q2FZU5_STAA8 Glutamate dehydrogenase OS=Staphylococcus aureus (strain NCTC 8325) GN=SAOUHSC_00895 PE=3 SV=1	-0.00427589	0.0271033	0.0553346	-0.103364	0.0352017		31	31	31	81.4	81.4	81.4	0	323.31	31	31	31	28	29	29	28	29	29	28	29	29	1.1282	0.98389	58.722	117	0	1.5765	31.969	36	0	0.99063	75.246	39	0	0.99343	59.553	42	0	76.8	80	74.2
Q2FZU6	Q2FZU6	Ornithine aminotransferase	>tr|Q2FZU6|Q2FZU6_STAA8 Ornithine aminotransferase OS=Staphylococcus aureus (strain NCTC 8325) GN=rocD PE=3 SV=1	-0.043741	0.500202	-0.0875034	0.0209111	-0.0646308		30	30	30	74.7	74.7	74.7	0	323.31	30	30	30	27	25	28	27	25	28	27	25	28	1.1292	0.98056	30.578	98	0	1.43	25.88	32	0	1.0954	28.445	32	0	0.92885	36.585	34	0	65.9	63.1	68.7
Q2FZU7	Q2FZU7	FMN oxidoreductase, putative	>tr|Q2FZU7|Q2FZU7_STAA8 FMN oxidoreductase, putative OS=Staphylococcus aureus (strain NCTC 8325) GN=SAOUHSC_00893 PE=4 SV=1	-0.185955	0.385032	0.145743	-0.226628	-0.47698		17	17	17	58.4	58.4	58.4	0	188.57	17	17	17	15	16	16	15	16	16	15	16	16	0.9336	0.89924	30.464	35	0	1.6109	24.773	11	0	0.88019	24.199	12	0	0.70513	26.285	12	0	54.9	57.1	58.4
Q2FZU9	Q2FZU9	Putative peptidyl-prolyl cis-trans isomerase	>sp|Q2FZU9|PPI1_STAA8 Putative peptidyl-prolyl cis-trans isomerase OS=Staphylococcus aureus (strain NCTC 8325) GN=SAOUHSC_00891 PE=3 SV=1	-0.0751349	0.0657857	0.591296	-0.703337	-0.113364		9	9	9	64	64	64	0	130.8	9	9	9	8	8	7	8	8	7	8	8	7	0.94059	0.99966	54.733	15	0	2.2811	38.532	6	0	0.63105	18.943	4	0	0.93365	36.255	5	0	50.8	59.9	46.7
Q2FZV0	Q2FZV0	Putative uncharacterized protein	>tr|Q2FZV0|Q2FZV0_STAA8 Putative uncharacterized protein OS=Staphylococcus aureus (strain NCTC 8325) GN=SAOUHSC_00890 PE=4 SV=1	-0.982451	1.10429	NaN	-0.860452	-1.10445		2	2	2	23.6	23.6	23.6	0	2.12	2	2	2	1	2	2	1	2	2	1	2	2	1.0914	1.0628	103.82	5	3	NaN	NaN	1	1	0.56422	92.961	2	1	0.44145	141.47	2	1	8.7	23.6	23.6
Q2FZV4	Q2FZV4	Putative uncharacterized protein	>tr|Q2FZV4|Q2FZV4_STAA8 Putative uncharacterized protein OS=Staphylococcus aureus (strain NCTC 8325) GN=SAOUHSC_00881 PE=4 SV=1	0.0389042	0.0732607	0.387252	-0.10462	-0.16592		7	7	7	48.4	48.4	48.4	0	40.744	7	7	7	6	6	6	6	6	6	6	6	6	1.1153	0.93005	37.155	9	0	1.8997	35.671	3	0	0.93851	41.525	3	0	0.82971	38.6	3	0	48.4	44.4	44.4
Q2FZV6	Q2FZV6	Leucine aminopeptidase 2, chloroplastic	>tr|Q2FZV6|Q2FZV6_STAA8 Leucine aminopeptidase 2, chloroplastic OS=Staphylococcus aureus (strain NCTC 8325) GN=SAOUHSC_00879 PE=4 SV=1	-0.256881	0.47692	0.109561	-0.288047	-0.592158		12	12	12	25.1	25.1	25.1	0	71.373	12	12	12	9	10	12	9	10	12	9	10	12	1.0834	0.98037	46.57	26	0	1.5539	22.603	9	0	0.84244	41.44	10	0	0.64749	72.754	7	0	18.9	21	25.1
Q2FZV7	Q2FZV7	NADH dehydrogenase-like protein SAOUHSC_00878	>sp|Q2FZV7|Y878_STAA8 NADH dehydrogenase-like protein SAOUHSC_00878 OS=Staphylococcus aureus (strain NCTC 8325) GN=SAOUHSC_00878 PE=3 SV=1	0.0705665	0.307337	-0.0832635	0.0856966	0.209266		17	17	17	37.8	37.8	37.8	0	233.93	17	17	17	13	13	14	13	13	14	13	13	14	1.1637	1.1006	37.005	39	0	1.4223	31.111	11	0	1.1356	38.833	14	0	1.1018	33.062	14	0	31.3	33.1	35.8
Q2FZV8	Q2FZV8	Putative uncharacterized protein	>tr|Q2FZV8|Q2FZV8_STAA8 Putative uncharacterized protein OS=Staphylococcus aureus (strain NCTC 8325) GN=SAOUHSC_00877 PE=4 SV=1	0.853936	1.20834	0.421802	0.974896	1.16511		2	2	2	19.3	19.3	19.3	0	5.646	2	2	2	2	2	2	2	2	2	2	2	2	1.8538	2.0249	26.162	3	0	1.8538	67.051	3	2	2.0322	14.31	2	1	2.1151	14.436	2	1	19.3	19.3	19.3
Q2FZW0	Q2FZW0	Putative uncharacterized protein	>tr|Q2FZW0|Q2FZW0_STAA8 Putative uncharacterized protein OS=Staphylococcus aureus (strain NCTC 8325) GN=SAOUHSC_00875 PE=4 SV=1	0.0786168	0.400422	-0.040037	0.06226	0.213627		12	12	12	41.2	41.2	41.2	0	54.112	12	12	12	12	11	11	12	11	11	12	11	11	1.1156	1.0397	20.412	27	0	1.3302	12.783	9	0	1.0831	11.816	7	0	1.0699	28.731	11	0	41.2	38.1	37.6
Q2FZW3	Q2FZW3	Extramembranal protein	>tr|Q2FZW3|Q2FZW3_STAA8 Extramembranal protein OS=Staphylococcus aureus (strain NCTC 8325) GN=SAOUHSC_00872 PE=4 SV=1	-0.363123	1.05304	-0.13473	-0.511259	-0.443379		7	7	7	20.5	20.5	20.5	0	12.964	7	7	7	4	3	4	4	3	4	4	3	4	1.0182	0.89284	24.744	6	0	1.2673	30.764	3	1	0.7217	13.341	2	0	0.68806	52.869	4	2	12.8	9	12.3
Q2FZW6	Q2FZW6	D-alanine--poly(phosphoribitol) ligase subunit 1	>sp|Q2FZW6|DLTA_STAA8 D-alanine--poly(phosphoribitol) ligase subunit 1 OS=Staphylococcus aureus (strain NCTC 8325) GN=dltA PE=3 SV=1	-0.101179	0.806144	-0.0671527	-0.0450741	-0.19131		17	17	17	44.7	44.7	44.7	0	229.48	17	17	17	15	14	14	15	14	14	15	14	14	1.0274	0.94393	30.805	43	0	1.4156	33.655	14	0	1.0005	18.235	14	0	0.84299	35.225	15	0	40.2	37.9	40.8
Q2FZW9	Q2FZW9	D-isomer specific 2-hydroxyacid dehydrogenase, NAD binding domain protein	>tr|Q2FZW9|Q2FZW9_STAA8 D-isomer specific 2-hydroxyacid dehydrogenase, NAD binding domain protein OS=Staphylococcus aureus (strain NCTC 8325) GN=SAOUHSC_00866 PE=3 SV=1	0.0596064	1.21828	0.040682	0.0900404	0.0480967		8	8	8	31.6	31.6	31.6	0	60.615	8	8	8	4	7	7	4	7	7	4	7	7	1.0315	1.0339	30.979	10	0	1.5072	40.757	3	1	1.0705	39.264	4	0	1.0251	11.671	4	0	18.7	31.3	25.9
Q2FZX0	Q2FZX0	Protein NagD homolog	>sp|Q2FZX0|NAGD_STAA8 Protein NagD homolog OS=Staphylococcus aureus (strain NCTC 8325) GN=nagD PE=3 SV=1	0.150937	0.111138	0.952408	-0.64273	0.143132		7	7	7	37.1	37.1	37.1	0	38.406	7	7	7	7	4	5	7	4	5	7	4	5	1.0881	1.1043	51.501	13	0	2.8038	41.128	4	0	0.63967	35.702	4	0	1.0613	35.506	5	0	37.1	17.4	25.5
Q2FZX3	Q2FZX3	Putative uncharacterized protein	>tr|Q2FZX3|Q2FZX3_STAA8 Putative uncharacterized protein OS=Staphylococcus aureus (strain NCTC 8325) GN=SAOUHSC_00862 PE=4 SV=1	0.140502	0.81707	NaN	0.106214	0.17479		1	1	1	7.9	7.9	7.9	0.0018727	1.7018	1	1	1	1	1	1	1	1	1	1	1	1	1.0721	1.1288	5.9229	3	0	NaN	NaN	1	0	1.0943	4.3358	2	1	1.0487	11.345	3	2	7.9	7.9	7.9
Q2FZY3	Q2FZY3	UPF0051 protein SAOUHSC_00851	>sp|Q2FZY3|Y851_STAA8 UPF0051 protein SAOUHSC_00851 OS=Staphylococcus aureus (strain NCTC 8325) GN=SAOUHSC_00851 PE=3 SV=1	-0.0190514	0.155781	-0.0916789	0.0558898	-0.021365		27	27	27	64.5	64.5	64.5	0	290.12	27	27	27	23	23	23	23	23	23	23	23	23	1.1886	0.996	28.544	54	0	1.376	22.326	16	0	1.0954	23.848	20	0	0.92963	37.671	18	0	53.5	54.2	60
Q2FZY4	Q2FZY4	Putative uncharacterized protein	>tr|Q2FZY4|Q2FZY4_STAA8 Putative uncharacterized protein OS=Staphylococcus aureus (strain NCTC 8325) GN=SAOUHSC_00850 PE=4 SV=1	0.0351995	0.0510247	0.42374	0.0311129	-0.349254		4	4	4	29.9	29.9	29.9	0	22.694	4	4	4	4	3	3	4	3	3	4	3	3	1.4041	1.1796	16.096	6	0	1.81	12.096	3	0	1.0299	47.05	3	1	0.77356	31.768	4	3	29.9	22.7	22.7
Q2FZY5	Q2FZY5	Cysteine desulfurase	>tr|Q2FZY5|Q2FZY5_STAA8 Cysteine desulfurase OS=Staphylococcus aureus (strain NCTC 8325) GN=SAOUHSC_00849 PE=4 SV=1	-0.121542	1.22622	-0.0662914	-0.124723	-0.173612		14	14	14	46.9	46.9	46.9	0	84.719	14	14	14	9	10	11	9	10	11	9	10	11	1.0011	0.92882	33.72	18	0	1.3996	45.634	5	0	0.95447	24.767	7	0	0.84817	32.256	6	0	30.8	31.7	37.3
Q2FZY6	Q2FZY6	Putative uncharacterized protein	>tr|Q2FZY6|Q2FZY6_STAA8 Putative uncharacterized protein OS=Staphylococcus aureus (strain NCTC 8325) GN=SAOUHSC_00848 PE=4 SV=1	-0.105429	0.125159	0.190425	-0.681886	0.175173		12	12	12	34	34	34	0	67.944	12	12	12	9	9	7	9	9	7	9	9	7	1.1008	1.0554	51.15	19	0	1.5939	25.662	7	0	0.62867	15.222	6	0	1.0641	76.539	6	0	31.7	21.4	14.5
Q2FZY7	Q2FZY7	ABC transporter, ATP-binding protein, putative	>tr|Q2FZY7|Q2FZY7_STAA8 ABC transporter, ATP-binding protein, putative OS=Staphylococcus aureus (strain NCTC 8325) GN=SAOUHSC_00847 PE=3 SV=1	0.240545	0.151442	1.18669	-0.725685	0.260628		10	10	10	45.1	45.1	45.1	0	64.724	10	10	10	9	7	8	9	7	8	9	7	8	1.0994	1.198	86.089	15	0	3.3066	22.738	5	0	0.63791	15.983	5	0	1.0994	125.03	5	0	39.5	41.5	36
Q2FZZ0	Q2FZZ0	Lipoprotein	>tr|Q2FZZ0|Q2FZZ0_STAA8 Lipoprotein OS=Staphylococcus aureus (strain NCTC 8325) GN=SAOUHSC_00844 PE=3 SV=1	-0.677862	0.378092	0.334797	-0.421689	-1.94669		6	6	6	26.7	26.7	26.7	0	58.393	6	6	6	4	3	4	4	3	4	4	3	4	1.5077	1.1464	59.778	3	0	1.7487	61.539	4	2	0.74744	60.156	2	1	0.24102	52.552	3	3	18.3	15	17.2
Q2FZZ2	Q2FZZ2	Methionine import ATP-binding protein MetN 2	>sp|Q2FZZ2|METN2_STAA8 Methionine import ATP-binding protein MetN 2 OS=Staphylococcus aureus (strain NCTC 8325) GN=metN2 PE=3 SV=1	0.112413	0.114632	0.761966	-0.342012	-0.0827133		5	5	5	23.5	23.5	23.5	0	69.88	5	5	5	5	3	4	5	3	4	5	3	4	1.0597	0.99	39.407	6	0	2.2796	25.085	4	2	0.79284	10.748	2	0	0.88541	40.183	4	2	23.5	12.3	19.6
Q2FZZ6	Q2FZZ6	Putative uncharacterized protein	>tr|Q2FZZ6|Q2FZZ6_STAA8 Putative uncharacterized protein OS=Staphylococcus aureus (strain NCTC 8325) GN=SAOUHSC_00838 PE=4 SV=1	0.0326528	0.0753498	-0.25135	0.143916	0.205393		9	9	9	35.3	35.3	35.3	0	93.992	9	9	9	9	6	5	9	6	5	9	6	5	1.1541	1.0327	35.658	14	0	1.2186	37.424	6	0	1.1545	24.353	4	0	1.0664	24.587	4	0	35.3	25	18.8
Q2FZZ8	Q2FZZ8	Glycine cleavage system H protein	>sp|Q2FZZ8|GCSH_STAA8 Glycine cleavage system H protein OS=Staphylococcus aureus (strain NCTC 8325) GN=gcvH PE=3 SV=1	-0.112093	0.0496745	1.07553	-1.43854	0.0267293		5	5	5	51.6	51.6	51.6	0	259.13	5	5	5	4	4	5	4	4	5	4	4	5	0.95917	1.0187	71.326	18	0	3.1733	31.753	6	0	0.38889	39.97	6	0	0.95917	36.955	6	0	42.1	42.1	51.6
Q2FZZ9	Q2FZZ9	Putative uncharacterized protein	>tr|Q2FZZ9|Q2FZZ9_STAA8 Putative uncharacterized protein OS=Staphylococcus aureus (strain NCTC 8325) GN=SAOUHSC_00835 PE=4 SV=1	0.106909	0.151877	0.581785	-0.233413	-0.0276456		8	8	8	78	78	78	0	138.54	8	8	8	7	8	8	7	8	8	7	8	8	0.97889	0.95966	37.329	18	0	2.2544	35.238	5	0	0.87195	15.231	7	0	0.95401	18.987	6	0	76.3	78	78
Q2G000	Q2G000	Thioredoxin, putative	>tr|Q2G000|Q2G000_STAA8 Thioredoxin, putative OS=Staphylococcus aureus (strain NCTC 8325) GN=SAOUHSC_00834 PE=4 SV=1	-0.00213762	0.00154546	0.614851	-0.818249	0.196985		2	2	2	24.5	24.5	24.5	0	42.897	2	2	2	2	2	2	2	2	2	2	2	2	1.1166	1.1218	48.213	9	0	2.3124	52.698	3	0	0.60581	42.363	3	0	1.1005	4.2345	3	0	24.5	24.5	24.5
Q2G019	Q2G019	Putative uncharacterized protein	>tr|Q2G019|Q2G019_STAA8 Putative uncharacterized protein OS=Staphylococcus aureus (strain NCTC 8325) GN=SAOUHSC_00808 PE=1 SV=1	-0.279777	0.189346	0.387252	0.0861043	-1.31269		9	9	9	40.1	40.1	40.1	0	44.999	9	9	9	8	3	5	8	3	5	8	3	5	0.87777	0.88201	54.27	5	0	1.9164	52.388	3	0	1.0654	26.19	2	1	0.39371	63.213	5	4	34.3	16.5	25.2
Q2G024	Q2G024	Ribonuclease R	>tr|Q2G024|Q2G024_STAA8 Ribonuclease R OS=Staphylococcus aureus (strain NCTC 8325) GN=rnr PE=3 SV=1	-0.410338	2.06202	-0.333425	-0.448784	-0.448804		13	13	13	18.5	18.5	18.5	0	55.095	13	13	13	7	8	7	7	8	7	7	8	7	0.76869	0.73266	29.183	11	0	1.0384	6.9697	3	0	0.72179	37.25	5	0	0.71053	27.723	3	0	10	13.3	10.3
Q2G025	Q2G025	Carboxylesterase, putative	>tr|Q2G025|Q2G025_STAA8 Carboxylesterase, putative OS=Staphylococcus aureus (strain NCTC 8325) GN=SAOUHSC_00802 PE=4 SV=1	0.508518	0.899263	0.908505	0.314174	0.302875		6	6	6	23.6	23.6	23.6	0	51.73	6	6	6	4	6	3	4	6	3	4	6	3	1.3145	1.2336	20.944	9	0	2.6769	30.829	4	2	1.279	20.444	4	0	1.1702	28.809	3	0	17.5	23.6	12.2
Q2G028	Q2G028	Enolase	>sp|Q2G028|ENO_STAA8 Enolase OS=Staphylococcus aureus (strain NCTC 8325) GN=eno PE=1 SV=1	-0.20339	0.60215	-0.0156075	-0.44493	-0.149633		29	29	29	69.4	69.4	69.4	0	323.31	29	29	29	24	26	26	24	26	26	24	26	26	1.0001	0.87712	47.197	100	0	1.5065	34.39	32	0	0.78148	27.1	32	0	0.87937	61.649	36	0	60.8	69.1	68.9
Q2G029	Q2G029	2,3-bisphosphoglycerate-independent phosphoglycerate mutase	>tr|Q2G029|Q2G029_STAA8 2,3-bisphosphoglycerate-independent phosphoglycerate mutase OS=Staphylococcus aureus (strain NCTC 8325) GN=gpmI PE=1 SV=1	-0.147941	0.498348	-0.360268	0.0200577	-0.103612		19	19	19	46.3	46.3	46.3	0	216.59	19	19	19	13	14	18	13	14	18	13	14	18	1.0637	0.93131	39.118	36	0	1.1071	14.122	11	0	1.0637	40.257	14	0	0.88261	48.14	11	0	32.3	36.8	44.8
Q2G030	Q2G030	Triosephosphate isomerase	>sp|Q2G030|TPIS_STAA8 Triosephosphate isomerase OS=Staphylococcus aureus (strain NCTC 8325) GN=tpiA PE=3 SV=1	0.0652771	0.243576	-0.0535985	0.257735	-0.00830491		22	22	22	92.5	92.5	92.5	0	323.31	22	22	22	20	22	21	20	22	21	20	22	21	1.1892	1.0647	25.725	86	0	1.3856	21.667	29	0	1.2758	20.959	29	0	0.94313	27.963	28	0	90.1	92.5	85
Q2G031	Q2G031	Phosphoglycerate kinase	>sp|Q2G031|PGK_STAA8 Phosphoglycerate kinase OS=Staphylococcus aureus (strain NCTC 8325) GN=pgk PE=3 SV=1	-0.0650024	0.553193	0.0234683	-0.106063	-0.112412		21	21	21	53	53	53	0	273.89	21	21	21	20	21	20	20	21	20	20	21	20	1.0455	0.94446	42.888	59	0	1.5493	20.262	20	0	0.9764	33.746	20	0	0.86841	57.477	19	0	53	53	53
Q2G032	Q2G032	Glyceraldehyde-3-phosphate dehydrogenase	>tr|Q2G032|Q2G032_STAA8 Glyceraldehyde-3-phosphate dehydrogenase OS=Staphylococcus aureus (strain NCTC 8325) GN=SAOUHSC_00795 PE=3 SV=1	-0.0973773	2.66205	-0.105939	-0.0957742	-0.0904189		26	26	26	92	92	92	0	323.31	26	26	26	19	25	23	19	25	23	19	25	23	1.1064	0.9358	49.971	74	0	1.3964	27.1	21	0	0.97408	47.845	27	0	0.90212	64.515	26	0	67.9	81.8	87.8
Q2G036	Q2G036	ATP-dependent Clp protease proteolytic subunit	>sp|Q2G036|CLPP_STAA8 ATP-dependent Clp protease proteolytic subunit OS=Staphylococcus aureus (strain NCTC 8325) GN=clpP PE=1 SV=1	2.82271	1.88122	2.17149	3.0986	3.19802		12	12	12	52.3	52.3	52.3	0	53.859	12	12	12	8	11	11	8	11	11	8	11	11	8.1629	8.312	84.419	30	0	6.8849	20.32	9	0	9.4288	84.297	12	0	8.7172	85.344	9	0	30.3	52.3	52.3
Q2G039	Q2G039	Nucleotide-binding protein SAOUHSC_00787	>sp|Q2G039|Y787_STAA8 Nucleotide-binding protein SAOUHSC_00787 OS=Staphylococcus aureus (strain NCTC 8325) GN=SAOUHSC_00787 PE=3 SV=2	0.324994	0.581121	0.153805	0.0777899	0.743386		5	5	5	18.8	18.8	18.8	0	8.9381	5	5	5	3	3	4	3	3	4	3	3	4	1.2295	1.0554	29.976	5	0	1.6516	43.598	2	0	1.1035	33.063	3	2	1.5726	26.341	3	1	12.5	9.6	13.2
Q2G041	Q2G041	Thioredoxin reductase	>tr|Q2G041|Q2G041_STAA8 Thioredoxin reductase OS=Staphylococcus aureus (strain NCTC 8325) GN=SAOUHSC_00785 PE=3 SV=1	-0.083326	0.0790689	0.57289	-0.617654	-0.205214		25	25	25	67.8	67.8	67.8	0	261.37	25	25	25	20	21	23	20	21	23	20	21	23	0.95324	0.98828	63.265	62	0	2.261	33.489	17	0	0.67838	54.585	20	0	0.83118	63.126	25	0	65.9	66.9	64.3
Q2G045	Q2G045	HPr kinase/phosphorylase	>sp|Q2G045|HPRK_STAA8 HPr kinase/phosphorylase OS=Staphylococcus aureus (strain NCTC 8325) GN=hprK PE=3 SV=1	-0.00874798	0.0238443	0.169412	0.0298416	-0.225498		11	11	11	37.7	37.7	37.7	0	35.012	11	11	11	11	9	10	11	9	10	11	9	10	1.0755	1.0243	24.094	20	0	1.5698	10.682	6	0	1.0323	13.518	7	0	0.81992	33.597	7	0	37.7	31.3	34.8
Q2G046	Q2G046	UvrABC system protein A	>tr|Q2G046|Q2G046_STAA8 UvrABC system protein A OS=Staphylococcus aureus (strain NCTC 8325) GN=uvrA PE=3 SV=1	-0.0280001	0.122254	-0.0330676	-0.160895	0.109962		11	11	11	13.4	13.4	13.4	0	20.747	11	11	11	5	7	7	5	7	7	5	7	7	1.0396	0.98007	19.712	10	0	1.3383	28.1	3	0	0.92903	14.87	4	0	1.0668	24.45	3	0	6.2	8.6	9.4
Q2G047	Q2G047	UvrABC system protein B	>tr|Q2G047|Q2G047_STAA8 UvrABC system protein B OS=Staphylococcus aureus (strain NCTC 8325) GN=SAOUHSC_00779 PE=4 SV=1	0.052267	0.097521	0.412185	-0.13462	-0.120765		8	8	8	30.2	30.2	30.2	0	15.673	8	8	8	4	4	7	4	4	7	4	4	7	1.2453	1.0786	24.68	4	0	1.949	73.44	4	2	0.90637	21.604	2	1	0.86307	80.059	6	5	13.3	14.5	27.8
Q2G050	Q2G050	Excinuclease ABC, B subunit	>tr|Q2G050|Q2G050_STAA8 Excinuclease ABC, B subunit OS=Staphylococcus aureus (strain NCTC 8325) GN=SAOUHSC_00776 PE=4 SV=1	0.313471	1.05379	0.277747	0.161049	0.501617		16	16	16	40.8	40.8	40.8	0	27.165	16	16	16	8	13	13	8	13	13	8	13	13	1.2117	1.137	22.78	14	0	1.5809	15.655	3	0	1.1227	20.115	6	0	1.3107	27.914	5	0	24.2	35.6	34.1
Q2G052	Q2G052	Peptide chain release factor 2	>tr|Q2G052|Q2G052_STAA8 Peptide chain release factor 2 OS=Staphylococcus aureus (strain NCTC 8325) GN=SAOUHSC_00771 PE=4 SV=1	-0.134849	0.377209	0.0270125	-0.0312973	-0.400263		5	5	5	21.3	21.3	21.3	0	20.586	5	5	5	4	3	3	4	3	3	4	3	3	0.99109	0.95915	21.103	9	0	1.3621	27.659	3	0	0.99893	9.568	3	0	0.70687	16.449	3	0	14.8	11	15.1
Q2G055	Q2G055	Uncharacterized protein SAOUHSC_00767	>sp|Q2G055|Y767_STAA8 Uncharacterized protein SAOUHSC_00767 OS=Staphylococcus aureus (strain NCTC 8325) GN=SAOUHSC_00767 PE=3 SV=1	-0.144535	0.213505	-0.064676	-0.598763	0.229834		9	9	9	54.7	54.7	54.7	0	103.93	9	9	9	7	5	8	7	5	8	7	5	8	1.1372	0.93889	52.425	19	0	1.4113	36.197	6	0	0.70958	28.975	6	0	1.1372	70.346	7	0	51.6	25.8	53.7
Q2G064	Q2G064	Peptidase T	>sp|Q2G064|PEPT_STAA8 Peptidase T OS=Staphylococcus aureus (strain NCTC 8325) GN=pepT PE=3 SV=1	-0.320977	0.745476	-0.475756	-0.00452274	-0.482654		8	8	8	24.5	24.5	24.5	0	26.688	8	8	8	7	6	6	7	6	6	7	6	6	1.0188	0.73908	24.642	10	0	1.0601	28.611	5	0	1.0346	23.997	3	0	0.68909	51.136	7	5	20.1	16.4	18.9
Q2G065	Q2G065	Putative uncharacterized protein	>tr|Q2G065|Q2G065_STAA8 Putative uncharacterized protein OS=Staphylococcus aureus (strain NCTC 8325) GN=SAOUHSC_00756 PE=4 SV=1	0.0182001	0.205469	-0.0415062	0.0299829	0.0661237		6	6	6	12.3	12.3	12.3	0	9.1691	6	6	6	4	6	5	4	6	5	4	6	5	1.0351	1.0029	13.266	15	0	1.2745	14.463	5	0	1.0351	10.392	5	0	0.96324	15.625	5	0	10.2	12.3	12.3
Q2G069	Q2G069	UDP-N-acetylenolpyruvoylglucosamine reductase	>sp|Q2G069|MURB_STAA8 UDP-N-acetylenolpyruvoylglucosamine reductase OS=Staphylococcus aureus (strain NCTC 8325) GN=murB PE=3 SV=1	0.17676	1.07087	0.0897694	0.161694	0.278817		10	10	10	31.9	31.9	31.9	0	39.459	10	10	10	6	7	10	6	7	10	6	7	10	1.2209	1.1756	17.094	19	0	1.5593	16.22	5	0	1.1383	12.461	6	0	1.1691	22.11	8	0	20.5	28.7	31.9
Q2G071	Q2G071	Putative uncharacterized protein	>tr|Q2G071|Q2G071_STAA8 Putative uncharacterized protein OS=Staphylococcus aureus (strain NCTC 8325) GN=SAOUHSC_00749 PE=4 SV=1	0.0673224	0.10975	0.466236	-0.0311941	-0.233074		4	4	4	10.5	10.5	10.5	0	13.001	4	4	4	4	2	3	4	2	3	4	2	3	1.1312	1.042	29.028	10	0	1.8832	21.269	4	0	1.0239	10.102	2	0	0.83017	25.28	4	0	10.5	7.9	7.9
Q2G077	Q2G077	Ribonucleotide-disphosphate reductase beta chain, putative	>tr|Q2G077|Q2G077_STAA8 Ribonucleotide-disphosphate reductase beta chain, putative OS=Staphylococcus aureus (strain NCTC 8325) GN=SAOUHSC_00743 PE=4 SV=1	0.0660891	0.234464	0.0892269	-0.120671	0.229711		9	9	9	43.7	43.7	43.7	0	77.906	9	9	9	4	5	8	4	5	8	4	5	8	1.0301	1.0767	27.298	6	0	1.4784	95.14	4	4	0.88924	24.725	3	0	1.1933	28.534	3	0	15.5	24.5	39.6
Q2G078	Q2G078	Ribonucleoside-diphosphate reductase	>tr|Q2G078|Q2G078_STAA8 Ribonucleoside-diphosphate reductase OS=Staphylococcus aureus (strain NCTC 8325) GN=SAOUHSC_00742 PE=3 SV=1	0.224353	1.28222	0.117695	0.281669	0.273695		32	32	32	48.3	48.3	48.3	0	232.41	32	32	32	24	29	28	24	29	28	24	29	28	1.3423	1.2091	26.652	69	0	1.6035	18.435	20	0	1.2869	27.519	27	0	1.1489	32.204	22	0	38.7	44.7	44.7
Q2G087	Q2G087	Histidinol-phosphate aminotransferase	>sp|Q2G087|HIS8_STAA8 Histidinol-phosphate aminotransferase OS=Staphylococcus aureus (strain NCTC 8325) GN=hisC PE=3 SV=1	0.100452	0.564031	-0.0252798	0.203765	0.122871		3	3	3	13.6	13.6	13.6	0	21.824	3	3	3	2	2	3	2	2	3	2	2	3	1.1543	1.0928	18.046	6	0	1.3349	16.99	2	0	1.1536	9.3841	2	0	1.0182	22.305	3	1	7.4	7.4	13.6
Q2G0B1	Q2G0B1	HTH-type transcriptional regulator MgrA	>sp|Q2G0B1|MGRA_STAA8 HTH-type transcriptional regulator MgrA OS=Staphylococcus aureus (strain NCTC 8325) GN=mgrA PE=1 SV=3	0.151188	0.991063	0.107286	0.090718	0.255561		16	16	16	70.1	70.1	70.1	0	206.44	16	16	16	13	13	14	13	13	14	13	13	14	1.2172	1.1108	24.666	48	0	1.5884	18.576	16	0	1.1509	20.947	15	0	1.0948	32.83	17	0	68.7	67.3	68.7
Q2G0B7	Q2G0B7	Putative uncharacterized protein	>tr|Q2G0B7|Q2G0B7_STAA8 Putative uncharacterized protein OS=Staphylococcus aureus (strain NCTC 8325) GN=SAOUHSC_00688 PE=4 SV=1	-0.458291	1.55653	-0.41156	-0.352768	-0.610543		3	3	3	14.4	14.4	14.4	0	3.713	3	3	3	3	2	2	3	2	2	3	2	2	0.94923	0.74757	27.612	6	0	1.0422	36.205	3	1	0.79506	34.842	2	0	0.62875	47.473	2	0	14.4	9.6	9.6
Q2G0B9	Q2G0B9	Putative uncharacterized protein	>tr|Q2G0B9|Q2G0B9_STAA8 Putative uncharacterized protein OS=Staphylococcus aureus (strain NCTC 8325) GN=SAOUHSC_00686 PE=4 SV=1	-0.345451	0.111478	0.584674	NaN	-1.27558		2	2	2	30.3	30.3	30.3	0	25.184	2	2	2	2	1	2	2	1	2	2	1	2	0.82659	0.8364	54.93	3	0	2.0657	3.7047	2	1	NaN	NaN	1	0	0.3825	31.024	2	1	30.3	14.1	30.3
Q2G0D0	Q2G0D0	Probable transcriptional regulatory protein SAOUHSC_00675	>sp|Q2G0D0|Y675_STAA8 Probable transcriptional regulatory protein SAOUHSC_00675 OS=Staphylococcus aureus (strain NCTC 8325) GN=SAOUHSC_00675 PE=3 SV=1	0.0150384	0.0237905	0.366252	0.00230651	-0.323444		6	6	6	46.2	46.2	46.2	0	103.11	6	6	6	5	5	6	5	5	6	5	5	6	0.99615	1.0016	26.782	11	0	1.7235	26.071	3	0	0.99615	17.948	3	0	0.78605	16.113	5	0	42.9	32.4	46.2
Q2G0D1	Q2G0D1	HTH-type transcriptional regulator SarX	>sp|Q2G0D1|SARX_STAA8 HTH-type transcriptional regulator SarX OS=Staphylococcus aureus (strain NCTC 8325) GN=sarX PE=2 SV=2	0.144273	0.428557	0.366924	-0.0717396	0.137635		9	9	9	58	58	58	0	49.667	9	9	9	6	8	8	6	8	8	6	8	8	1.095	1.1012	35.366	20	0	1.9076	14.351	6	0	0.98452	23.939	7	0	1.0655	52.89	7	0	43.7	57.1	47.9
Q2G0D6	Q2G0D6	Putative uncharacterized protein	>tr|Q2G0D6|Q2G0D6_STAA8 Putative uncharacterized protein OS=Staphylococcus aureus (strain NCTC 8325) GN=SAOUHSC_00669 PE=4 SV=1	0.23591	0.256097	0.853437	0.153287	-0.298992		4	4	4	20.5	20.5	20.5	0	39.833	4	4	4	3	4	3	3	4	3	3	4	3	0.95514	0.8822	33.6	3	0	2.5563	109.81	6	5	1.0974	98.718	5	4	0.76832	303.76	4	3	17.1	20.5	13.7
Q2G0E8	Q2G0E8	Putative uncharacterized protein	>tr|Q2G0E8|Q2G0E8_STAA8 Putative uncharacterized protein OS=Staphylococcus aureus (strain NCTC 8325) GN=SAOUHSC_00658 PE=4 SV=1	0.142997	0.258207	0.510152	-0.185228	0.104068		2	2	2	19.2	19.2	19.2	0	25.402	2	2	2	2	2	2	2	2	2	2	2	2	1.0098	1.0507	18.671	6	0	2.0279	8.9922	2	1	0.91893	21.935	2	0	0.98666	6.3567	3	0	19.2	19.2	19.2
Q2G0F2	Q2G0F2	Putative uncharacterized protein	>tr|Q2G0F2|Q2G0F2_STAA8 Putative uncharacterized protein OS=Staphylococcus aureus (strain NCTC 8325) GN=SAOUHSC_00617 PE=4 SV=1	0.0928131	0.00938026	NaN	2.85707	-2.67144		4	4	4	32.1	32.1	32.1	0	49.527	4	4	4	2	4	2	2	4	2	2	4	2	0.90067	0.61421	193.77	5	4	NaN	NaN	1	0	7.234	26.473	2	2	0.15182	13.95	2	2	19.6	32.1	19.6
Q2G0F3	Q2G0F3	Putative uncharacterized protein	>tr|Q2G0F3|Q2G0F3_STAA8 Putative uncharacterized protein OS=Staphylococcus aureus (strain NCTC 8325) GN=SAOUHSC_00616 PE=4 SV=1	0.47487	2.27603	0.462681	0.421802	0.540127		8	8	8	31.6	31.6	31.6	0	24.118	8	8	8	5	4	5	5	4	5	5	4	5	1.2101	1.1442	36.634	5	0	1.7153	25.281	3	1	1.3529	127.82	2	1	1.3965	75.002	4	2	22.2	16.2	25.6
Q2G0F6	Q2G0F6	Iron compound ABC transporter, substrate-binding protein, putative	>tr|Q2G0F6|Q2G0F6_STAA8 Iron compound ABC transporter, substrate-binding protein, putative OS=Staphylococcus aureus (strain NCTC 8325) GN=SAOUHSC_00613 PE=4 SV=1	0.106469	0.223104	0.447315	-0.0989226	-0.0289844		4	4	4	23.3	23.3	23.3	0.00093985	1.7423	4	4	4	3	2	3	3	2	3	3	2	3	1.2139	1.1826	25.696	7	0	1.9678	29.738	4	2	0.95083	33.414	2	0	0.95139	24.994	3	0	16.7	10.9	17.5
Q2G0F8	Q2G0F8	Arginine--tRNA ligase	>sp|Q2G0F8|SYR_STAA8 Arginine--tRNA ligase OS=Staphylococcus aureus (strain NCTC 8325) GN=argS PE=3 SV=1	-0.00191947	0.00487894	0.240986	-0.118288	-0.128456		32	32	32	68.5	68.5	68.5	0	323.31	32	32	32	28	28	27	28	28	27	28	28	27	1.0078	0.97502	28.943	65	0	1.7227	27.057	22	0	0.98162	20.066	22	0	0.86212	29.155	21	0	57.7	64	65.3
Q2G0G1	Q2G0G1	Alcohol dehydrogenase	>sp|Q2G0G1|ADH_STAA8 Alcohol dehydrogenase OS=Staphylococcus aureus (strain NCTC 8325) GN=adh PE=3 SV=1	-0.0787744	0.102337	0.0729976	0.275007	-0.584328		14	14	14	50.3	50.3	50.3	0	99.123	14	14	14	13	9	10	13	9	10	13	9	10	1.3075	1.0519	28.474	16	0	1.5004	11.502	8	0	1.1772	15.598	5	0	0.63414	30.348	3	0	46.7	31.2	42.9
Q2G0G2	Q2G0G2	Putative uncharacterized protein	>tr|Q2G0G2|Q2G0G2_STAA8 Putative uncharacterized protein OS=Staphylococcus aureus (strain NCTC 8325) GN=SAOUHSC_00607 PE=4 SV=1	0.390351	0.48978	NaN	0.172744	0.607958		4	4	4	27.2	27.2	27.2	0	9.0304	4	4	4	1	3	4	1	3	4	1	3	4	1.2167	1.2219	11.733	4	0	NaN	NaN	1	0	1.1543	4.9768	2	0	1.4499	110.16	4	3	6.9	20.8	27.2
Q2G0G3	Q2G0G3	Putative uncharacterized protein	>tr|Q2G0G3|Q2G0G3_STAA8 Putative uncharacterized protein OS=Staphylococcus aureus (strain NCTC 8325) GN=SAOUHSC_00606 PE=4 SV=1	0.0566093	0.198976	0.238909	0.0419438	-0.111025		18	18	18	49.2	49.2	49.2	0	74.039	18	18	18	15	14	12	15	14	12	15	14	12	1.0977	1.0295	22.281	27	0	1.672	22.418	10	0	1.0821	11.054	9	0	0.87283	29.752	8	0	47.1	40.4	36
Q2G0G6	Q2G0G6	Putative uncharacterized protein	>tr|Q2G0G6|Q2G0G6_STAA8 Putative uncharacterized protein OS=Staphylococcus aureus (strain NCTC 8325) GN=SAOUHSC_00603 PE=4 SV=1	-0.0741803	1.47721	-0.0877488	-0.0463995	-0.0883928		8	8	8	49.4	49.4	49.4	0	111.42	8	8	8	4	7	5	4	7	5	4	7	5	0.99816	0.94099	21.402	19	0	1.3821	18.043	5	0	0.95635	25.569	7	0	0.93653	19.397	7	0	25	45.8	24.7
Q2G0I4	Q2G0I4	Putative uncharacterized protein	>tr|Q2G0I4|Q2G0I4_STAA8 Putative uncharacterized protein OS=Staphylococcus aureus (strain NCTC 8325) GN=SAOUHSC_00581 PE=3 SV=1	0.341126	0.61787	0.703544	0.33308	-0.0132469		4	4	4	12	12	12	0	7.5925	4	4	4	2	4	2	2	4	2	2	4	2	1.1431	1.1858	20.698	4	0	2.4396	57.104	3	2	1.2383	79.234	3	1	0.91358	16.853	2	1	6.1	12	6.1
Q2G0J0	Q2G0J0	Phosphate acetyltransferase	>tr|Q2G0J0|Q2G0J0_STAA8 Phosphate acetyltransferase OS=Staphylococcus aureus (strain NCTC 8325) GN=SAOUHSC_00574 PE=4 SV=1	-0.0141013	0.0638043	-0.158655	0.0608775	0.0554733		15	15	15	59.8	59.8	59.8	0	323.31	15	15	15	13	12	12	13	12	12	13	12	12	1.1166	0.99566	20.487	38	0	1.365	22.03	12	0	1.1093	10.889	13	0	0.97754	25.867	13	0	51.5	53.7	53.7
Q2G0J1	Q2G0J1	Putative heme-dependent peroxidase SAOUHSC_00573	>sp|Q2G0J1|Y573_STAA8 Putative heme-dependent peroxidase SAOUHSC_00573 OS=Staphylococcus aureus (strain NCTC 8325) GN=SAOUHSC_00573 PE=3 SV=1	0.0822986	0.639292	0.0970713	0.157303	-0.00747806		16	16	16	54.8	54.8	54.8	0	146.67	16	16	16	14	12	13	14	12	13	14	12	13	1.2058	1.069	27.106	44	0	1.5687	24.612	14	0	1.2058	19.808	14	0	0.94117	32.576	16	0	49.6	46.8	54
Q2G0J7	Q2G0J7	Uracil-DNA glycosylase	>sp|Q2G0J7|UNG_STAA8 Uracil-DNA glycosylase OS=Staphylococcus aureus (strain NCTC 8325) GN=ung PE=3 SV=1	-0.186173	0.428255	-0.0129702	-0.0324182	-0.513131		4	4	4	20.2	20.2	20.2	0	3.3445	4	4	4	2	3	3	2	3	3	2	3	3	0.95651	0.82866	39.657	4	0	1.3276	48.709	2	0	0.9962	27.977	3	2	0.68488	30.671	2	1	9.6	14.2	15.6
Q2G0J8	Q2G0J8	Phosphomethylpyrimidine kinase	>tr|Q2G0J8|Q2G0J8_STAA8 Phosphomethylpyrimidine kinase OS=Staphylococcus aureus (strain NCTC 8325) GN=SAOUHSC_00562 PE=4 SV=1	0.804029	1.63923	0.574441	0.837863	0.999784		13	13	13	51.1	51.1	51.1	0	208.98	13	13	13	10	12	13	10	12	13	10	12	13	1.9756	1.6254	23.699	32	0	2.1707	11.861	9	0	1.8456	26.706	11	0	1.9049	25.261	12	0	47.8	45.3	51.1
Q2G0K5	Q2G0K5	Hydrolase, haloacid dehalogenase-like	>tr|Q2G0K5|Q2G0K5_STAA8 Hydrolase, haloacid dehalogenase-like OS=Staphylococcus aureus (strain NCTC 8325) GN=SAOUHSC_00555 PE=4 SV=1	-0.0281134	0.0428151	0.381837	-0.318416	-0.147761		8	8	8	59.5	59.5	59.5	0	89.342	8	8	8	7	6	7	7	6	7	7	6	7	0.93957	0.94753	42.525	14	0	1.9356	50.85	5	0	0.81349	34.29	4	0	0.88988	34.749	5	0	42.8	54	42.8
Q2G0K7	Q2G0K7	3-hexulose-6-phosphate synthase	>sp|Q2G0K7|HPS_STAA8 3-hexulose-6-phosphate synthase OS=Staphylococcus aureus (strain NCTC 8325) GN=SAOUHSC_00553 PE=3 SV=1	-0.147786	0.747592	-0.0444342	-0.111087	-0.287836		10	10	10	84.8	84.8	84.8	0	235.69	10	10	10	8	9	9	8	9	9	8	9	9	0.98352	0.88783	26.468	22	0	1.438	14.518	6	0	0.96261	12.642	8	0	0.77755	42.001	8	0	71.9	80.5	74.3
Q2G0K8	Q2G0K8	Glucosamine-6-phosphate deaminase	>sp|Q2G0K8|NAGB_STAA8 Glucosamine-6-phosphate deaminase OS=Staphylococcus aureus (strain NCTC 8325) GN=nagB PE=3 SV=1	0.271914	1.28146	0.378068	0.283092	0.154583		9	9	9	32.5	32.5	32.5	0	32.861	9	9	9	6	6	8	6	6	8	6	6	8	1.2138	1.2168	29.903	7	0	1.913	85.136	9	8	1.2265	43.233	7	5	1.0601	39.847	4	0	25.8	28.6	32.5
Q2G0L1	Q2G0L1	GTP cyclohydrolase FolE2	>sp|Q2G0L1|GCH4_STAA8 GTP cyclohydrolase FolE2 OS=Staphylococcus aureus (strain NCTC 8325) GN=folE2 PE=3 SV=1	0.406498	0.855518	0.720191	0.135404	0.3639		9	9	9	33.9	33.9	33.9	0	38.153	9	9	9	7	4	7	7	4	7	7	4	7	1.4584	1.3038	21.59	7	0	2.255	86.315	7	5	1.1215	38.489	4	2	1.2503	33.588	3	0	27.7	19.5	29.5
Q2G0L2	Q2G0L2	Putative uncharacterized protein	>tr|Q2G0L2|Q2G0L2_STAA8 Putative uncharacterized protein OS=Staphylococcus aureus (strain NCTC 8325) GN=SAOUHSC_00548 PE=4 SV=1	0.00916136	0.0775475	-0.0089435	-0.0476366	0.0840642		20	20	20	45.4	45.4	45.4	0	62.084	20	20	20	17	14	13	17	14	13	17	14	13	1.0335	0.97137	24.565	21	0	1.4845	18.607	7	0	1.0039	25.996	7	0	0.9962	30.109	7	0	39.3	29.6	27
Q2G0L3	Q2G0L3	Putative uncharacterized protein	>tr|Q2G0L3|Q2G0L3_STAA8 Putative uncharacterized protein OS=Staphylococcus aureus (strain NCTC 8325) GN=SAOUHSC_00547 PE=4 SV=1	-0.110005	2.15021	-0.0949573	-0.127006	-0.108052		11	11	11	23.9	23.9	23.9	0	36.392	11	11	11	10	10	9	10	10	9	10	10	9	1.0625	0.93117	20.415	22	0	1.3717	19.224	8	0	0.94921	23.295	7	0	0.87572	17.711	7	0	22	21.8	18.4
Q2G0L4	Q2G0L4	Serine-aspartate repeat-containing protein D	>sp|Q2G0L4|SDRD_STAA8 Serine-aspartate repeat-containing protein D OS=Staphylococcus aureus (strain NCTC 8325) GN=sdrD PE=1 SV=1	0.0957306	0.149839	-0.345803	0.277866	0.355129		20	20	18	23.9	23.9	21.1	0	191.04	20	20	18	19	13	14	19	13	14	17	12	13	1.2047	0.94212	32.193	22	0	1.0956	14.801	11	0	1.2521	14.732	5	0	1.2284	38.132	6	0	23	17.3	17.4
Q2G0L7	Q2G0L7	FMN-dependent NADPH-azoreductase	>sp|Q2G0L7|AZO1_STAA8 FMN-dependent NADPH-azoreductase OS=Staphylococcus aureus (strain NCTC 8325) GN=azo1 PE=3 SV=1	-0.0656645	0.051375	0.751892	-0.583312	-0.365574		7	7	7	80.9	80.9	80.9	0	54.117	7	7	7	5	4	5	5	4	5	5	4	5	0.74689	0.77616	50.881	8	0	2.4402	117.78	4	2	0.65915	62.184	5	3	0.73196	30.746	4	0	58.5	32.4	44.7
Q2G0L8	Q2G0L8	Putative uncharacterized protein	>tr|Q2G0L8|Q2G0L8_STAA8 Putative uncharacterized protein OS=Staphylococcus aureus (strain NCTC 8325) GN=SAOUHSC_00542 PE=4 SV=1	0.0699673	0.546519	0.063641	-0.0102651	0.156526		13	13	13	52.6	52.6	52.6	0	181.11	13	13	13	9	13	12	9	13	12	9	13	12	1.1276	1.0146	26.144	22	0	1.4762	12.66	6	0	1.0446	26.818	9	0	1.0852	35.588	7	0	40.8	52.6	50.5
Q2G0M1	Q2G0M1	Putative uncharacterized protein	>tr|Q2G0M1|Q2G0M1_STAA8 Putative uncharacterized protein OS=Staphylococcus aureus (strain NCTC 8325) GN=SAOUHSC_00539 PE=4 SV=1	0.0861547	0.961364	0.147567	0.0639171	0.0469799		5	5	5	29.1	29.1	29.1	0	12.293	5	5	5	4	4	4	4	4	4	4	4	4	1.052	1.0468	14.363	8	0	1.5262	24.801	4	2	1.0281	26.725	5	3	1.0033	14.295	4	0	24.1	22.3	22.3
Q2G0M2	Q2G0M2	Haloacid dehalogenase-like hydrolase, putative	>tr|Q2G0M2|Q2G0M2_STAA8 Haloacid dehalogenase-like hydrolase, putative OS=Staphylococcus aureus (strain NCTC 8325) GN=SAOUHSC_00538 PE=4 SV=1	0.336529	0.434018	0.908967	0.149389	-0.0487703		3	3	3	14.1	14.1	14.1	0	2.9162	3	3	3	2	2	3	2	2	3	2	2	3	1.3049	1.3963	42.504	7	7	2.5237	47.357	3	3	1.1173	52.349	2	2	0.91906	51.99	2	2	8.4	8.4	14.1
Q2G0M4	Q2G0M4	Branched-chain-amino-acid aminotransferase	>tr|Q2G0M4|Q2G0M4_STAA8 Branched-chain-amino-acid aminotransferase OS=Staphylococcus aureus (strain NCTC 8325) GN=SAOUHSC_00536 PE=3 SV=1	-0.392278	0.287201	0.578021	-1.09909	-0.655762		18	18	18	63.4	63.4	63.4	0	243.27	18	18	18	16	16	15	16	16	15	16	16	15	0.71778	0.73367	58.684	36	0	2.1808	26.918	12	0	0.48953	40.877	10	0	0.61075	45.572	14	0	58.9	62.8	59.2
Q2G0M5	Q2G0M5	Uncharacterized epimerase/dehydratase SAOUHSC_00535	>sp|Q2G0M5|Y535_STAA8 Uncharacterized epimerase/dehydratase SAOUHSC_00535 OS=Staphylococcus aureus (strain NCTC 8325) GN=SAOUHSC_00535 PE=3 SV=1	0.0453732	1.34201	0.0321009	0.0650208	0.038998		19	19	19	70.1	70.1	70.1	0	263.64	19	19	19	17	13	13	17	13	13	17	13	13	1.154	1.0273	35.297	49	0	1.5431	39.782	17	0	1.1079	24.549	16	0	0.98828	41.172	16	0	63.2	50.5	53.9
Q2G0M6	Q2G0M6	Ribulokinase	>sp|Q2G0M6|ARAB_STAA8 Ribulokinase OS=Staphylococcus aureus (strain NCTC 8325) GN=araB PE=3 SV=1	-0.00895038	0.0299591	0.17031	-0.151715	-0.0454463		7	7	7	17.8	17.8	17.8	0	57.445	7	7	7	5	7	7	5	7	7	5	7	7	1.0466	1.0172	20.872	15	0	1.4557	19.939	4	0	0.94386	15.322	5	0	0.94027	25.298	6	0	13.6	17.8	17.8
Q2G0M7	Q2G0M7	Molecular chaperone Hsp31 and glyoxalase 3	>sp|Q2G0M7|HCHA_STAA8 Molecular chaperone Hsp31 and glyoxalase 3 OS=Staphylococcus aureus (strain NCTC 8325) GN=hchA PE=3 SV=1	0.0949083	0.414196	0.107152	-0.0599912	0.237564		13	13	13	45.2	45.2	45.2	0	189.28	13	13	13	12	11	10	12	11	10	12	11	10	1.1691	1.0773	29.96	34	0	1.5802	29.011	11	0	0.99628	26.091	10	0	1.0847	33.412	13	0	45.2	40.4	41.4
Q2G0M8	Q2G0M8	Putative uncharacterized protein	>tr|Q2G0M8|Q2G0M8_STAA8 Putative uncharacterized protein OS=Staphylococcus aureus (strain NCTC 8325) GN=SAOUHSC_00532 PE=3 SV=1	-0.168012	0.439613	0.111966	-0.365871	-0.250131		26	26	26	74.9	74.9	74.9	0	323.31	26	26	26	23	24	26	23	24	26	23	24	26	0.90612	0.8563	36.111	86	0	1.6385	20.336	25	0	0.81687	30.394	30	0	0.79447	44.482	31	0	69.4	72.2	74.9
Q2G0M9	Q2G0M9	Putative uncharacterized protein	>tr|Q2G0M9|Q2G0M9_STAA8 Putative uncharacterized protein OS=Staphylococcus aureus (strain NCTC 8325) GN=SAOUHSC_00531 PE=4 SV=1	0.243574	0.262148	-0.350191	0.823179	0.257735		9	9	9	33.5	33.5	33.5	0	18.184	9	9	9	6	7	4	6	7	4	6	7	4	1.2278	0.90168	38.489	7	0	1.0722	24.338	3	0	1.8397	66.555	7	5	1.1338	36.198	4	2	21.2	26.1	14.1
Q2G0N0	Q2G0N0	Elongation factor Tu	>sp|Q2G0N0|EFTU_STAA8 Elongation factor Tu OS=Staphylococcus aureus (strain NCTC 8325) GN=tuf PE=3 SV=1	0.0938469	0.425201	0.186754	-0.0718003	0.166587		39	39	39	87.8	87.8	87.8	0	323.31	39	39	39	35	37	38	35	37	38	35	37	38	1.2488	1.0728	57.353	199	0	1.7192	40.671	63	0	1.0058	58.838	66	0	1.0729	67.937	70	0	86.8	83.2	87.8
Q2G0N1	Q2G0N1	Elongation factor G	>sp|Q2G0N1|EFG_STAA8 Elongation factor G OS=Staphylococcus aureus (strain NCTC 8325) GN=fusA PE=3 SV=3	-0.0220288	0.325913	-0.0686649	-0.0146307	0.0172092		49	49	49	82.5	82.5	82.5	0	323.31	49	49	49	42	43	46	42	43	46	42	43	46	1.1136	0.9899	42.626	176	0	1.4176	27.044	59	0	1.0501	46.488	59	0	0.97577	50.954	58	0	70	76.2	76.2
Q2G0N5	Q2G0N5	DNA-directed RNA polymerase subunit beta	>sp|Q2G0N5|RPOC_STAA8 DNA-directed RNA polymerase subunit beta OS=Staphylococcus aureus (strain NCTC 8325) GN=rpoC PE=3 SV=2	0.0147729	0.147697	-0.00249806	0.0816123	-0.0347957		110	110	110	79.7	79.7	79.7	0	323.31	110	110	110	95	99	99	95	99	99	95	99	99	1.1488	1.0217	33.68	320	0	1.4948	22.636	100	0	1.1288	33.326	106	0	0.93822	41.35	114	0	73.2	77.3	74.2
Q2G0N7	Q2G0N7	Putative uncharacterized protein	>tr|Q2G0N7|Q2G0N7_STAA8 Putative uncharacterized protein OS=Staphylococcus aureus (strain NCTC 8325) GN=SAOUHSC_00523 PE=4 SV=1	-0.304626	0.262214	NaN	0.0483758	-0.657627		5	5	5	31.2	31.2	31.2	0	8.9205	5	5	5	3	3	4	3	3	4	3	3	4	0.94061	0.99056	16.211	3	0	NaN	NaN	1	1	1.0462	54.764	4	2	0.60593	50.916	4	3	16.8	16.8	23.3
Q2G0N9	Q2G0N9	50S ribosomal protein L10	>sp|Q2G0N9|RL10_STAA8 50S ribosomal protein L10 OS=Staphylococcus aureus (strain NCTC 8325) GN=rplJ PE=3 SV=1	-0.00373527	0.00227266	0.927821	-0.812131	-0.126896		9	9	9	52.4	52.4	52.4	0	139.51	9	9	9	8	7	7	8	7	7	8	7	7	0.89286	0.92444	72.652	16	0	2.8743	51.979	5	0	0.57495	58.765	6	0	0.88036	24.307	5	0	52.4	44	48.2
Q2G0P0	Q2G0P0	50S ribosomal protein L1	>sp|Q2G0P0|RL1_STAA8 50S ribosomal protein L1 OS=Staphylococcus aureus (strain NCTC 8325) GN=rplA PE=3 SV=1	0.0685004	0.087292	0.581978	-0.274878	-0.101598		17	17	17	51.3	51.3	51.3	0	143.42	17	17	17	14	13	16	14	13	16	14	13	16	0.95211	0.94249	37.688	44	0	2.0981	30.762	14	0	0.86993	14.907	15	0	0.89462	40.258	15	0	48.3	45.2	48.3
Q2G0P2	Q2G0P2	Transcription termination/antitermination protein NusG	>sp|Q2G0P2|NUSG_STAA8 Transcription termination/antitermination protein NusG OS=Staphylococcus aureus (strain NCTC 8325) GN=nusG PE=3 SV=1	0.281917	0.182201	0.0521377	-0.528719	1.32233		7	7	7	49.5	49.5	49.5	0	70.861	7	7	7	6	3	3	6	3	3	6	3	3	1.4901	1.0257	61.631	4	0	1.5068	43.096	3	0	0.68409	85.87	3	3	2.3342	109.29	4	3	48.9	33	33.5
Q2G0P5	Q2G0P5	ATP-dependent Clp protease ATP-binding subunit ClpC	>sp|Q2G0P5|CLPC_STAA8 ATP-dependent Clp protease ATP-binding subunit ClpC OS=Staphylococcus aureus (strain NCTC 8325) GN=clpC PE=1 SV=1	-0.0348575	0.492937	-0.00450825	-0.08804	-0.0120243		56	56	53	64.7	64.7	61.9	0	323.31	56	56	53	45	46	51	45	46	51	42	43	48	1.0889	0.98796	41.015	133	0	1.4847	24.499	42	0	1.0013	32.383	43	0	0.96489	56.385	48	0	58.8	61.1	62.5
Q2G0P6	Q2G0P6	Protein-arginine kinase	>sp|Q2G0P6|MCSB_STAA8 Protein-arginine kinase OS=Staphylococcus aureus (strain NCTC 8325) GN=mcsB PE=1 SV=1	0.606939	1.0482	0.400975	0.423309	0.996533		7	7	7	24.2	24.2	24.2	0	13.441	7	7	7	2	3	5	2	3	5	2	3	5	1.4437	1.3186	27.639	5	0	1.7992	9.7557	2	1	1.3906	2.3801	2	0	1.9281	43.574	4	2	7.8	10.4	17
Q2G0P7	Q2G0P7	Protein-arginine kinase activator protein	>sp|Q2G0P7|MCSA_STAA8 Protein-arginine kinase activator protein OS=Staphylococcus aureus (strain NCTC 8325) GN=mcsA PE=1 SV=2	1.18486	0.605042	-0.119385	2.42441	1.24957		2	2	2	13.8	13.8	13.8	0	5.8892	2	2	2	1	2	2	1	2	2	1	2	2	0.97054	0.83056	17.274	6	0	1.2149	23.642	2	0	5.2871	104.31	3	1	2.2291	72.614	3	1	6.4	13.8	13.8
Q2G0P8	Q2G0P8	Transcriptional regulator CtsR	>sp|Q2G0P8|CTSR_STAA8 Transcriptional regulator CtsR OS=Staphylococcus aureus (strain NCTC 8325) GN=ctsR PE=1 SV=1	0.222954	1.31957	NaN	0.239765	0.206143		4	4	4	24.8	24.8	24.8	0	6.201	4	4	4	2	3	3	2	3	3	2	3	3	1.2784	1.3072	20.565	5	0	NaN	NaN	1	0	1.1768	30.246	4	2	1.0957	52.469	4	2	17.6	24.8	24.8
Q2G0Q0	Q2G0Q0	Pyridoxal 5-phosphate synthase subunit PdxT	>sp|Q2G0Q0|PDXT_STAA8 Pyridoxal 5-phosphate synthase subunit PdxT OS=Staphylococcus aureus (strain NCTC 8325) GN=pdxT PE=3 SV=1	1.17559	1.36362	0.682663	1.5201	1.324		13	13	13	62.9	62.9	62.9	0	49.958	13	13	13	9	11	10	9	11	10	9	11	10	2.4177	2.0604	40.366	11	0	2.3244	2.6855	3	0	3.1207	29.819	4	0	2.2971	51.328	4	0	54.8	62.9	57
Q2G0Q1	Q2G0Q1	Pyridoxal 5-phosphate synthase subunit PdxS	>sp|Q2G0Q1|PDXS_STAA8 Pyridoxal 5-phosphate synthase subunit PdxS OS=Staphylococcus aureus (strain NCTC 8325) GN=pdxS PE=3 SV=1	0.0652195	0.207372	0.230572	-0.149281	0.114367		22	22	22	72.9	72.9	72.9	0	323.31	22	22	22	17	21	21	17	21	21	17	21	21	1.1575	1.0375	44.956	66	0	1.7603	27.301	17	0	0.95839	37.644	24	0	1.0324	58.524	25	0	65.1	70.2	68.8
Q2G0Q3	Q2G0Q3	Lysine--tRNA ligase	>sp|Q2G0Q3|SYK_STAA8 Lysine--tRNA ligase OS=Staphylococcus aureus (strain NCTC 8325) GN=lysS PE=3 SV=1	-0.0971498	0.133161	0.401303	-0.39665	-0.296102		29	29	29	62	62	62	0	193.9	29	29	29	24	24	25	24	24	25	24	24	25	0.90462	0.89377	43.717	57	0	1.8315	32.368	19	0	0.75774	26.916	19	0	0.76301	40.664	19	0	54.3	53.7	59
Q2G0Q7	Q2G0Q7	Dihydropteroate synthase	>tr|Q2G0Q7|Q2G0Q7_STAA8 Dihydropteroate synthase OS=Staphylococcus aureus (strain NCTC 8325) GN=SAOUHSC_00489 PE=3 SV=1	0.0686547	0.353965	0.205893	-0.0394883	0.0395595		7	7	7	45.7	45.7	45.7	0	75.392	7	7	7	4	4	7	4	4	7	4	4	7	1.0861	1.1015	41.221	11	0	1.6616	29.385	3	0	0.97187	37.718	4	0	0.96443	58.259	4	0	24	24	45.7
Q2G0Q8	Q2G0Q8	Cysteine synthase	>tr|Q2G0Q8|Q2G0Q8_STAA8 Cysteine synthase OS=Staphylococcus aureus (strain NCTC 8325) GN=SAOUHSC_00488 PE=3 SV=1	0.0189257	0.379901	-0.017972	0.042084	0.0326651		23	23	23	89.7	89.7	89.7	0	323.31	23	23	23	21	22	21	21	22	21	21	22	21	1.1297	1.0229	21.948	89	0	1.4877	24.563	28	0	1.0994	16.162	30	0	1.0054	24.813	31	0	88.4	89.4	81.3
Q2G0Q9	Q2G0Q9	33 kDa chaperonin	>sp|Q2G0Q9|HSLO_STAA8 33 kDa chaperonin OS=Staphylococcus aureus (strain NCTC 8325) GN=hslO PE=3 SV=1	-0.188403	0.278222	0.304745	-0.482956	-0.386996		5	5	5	23.2	23.2	23.2	0	25.227	5	5	5	5	3	3	5	3	3	5	3	3	0.71743	0.7152	57.88	4	0	1.6913	23.09	5	4	0.73155	16.765	3	1	0.7351	100.89	3	2	23.2	14.7	14.7
Q2G0R0	Q2G0R0	ATP-dependent zinc metalloprotease FtsH	>tr|Q2G0R0|Q2G0R0_STAA8 ATP-dependent zinc metalloprotease FtsH OS=Staphylococcus aureus (strain NCTC 8325) GN=ftsH PE=3 SV=1	0.00731858	0.0503305	-0.0124463	-0.0623995	0.0968015		23	23	23	34.9	34.9	34.9	0	210.94	23	23	23	21	21	19	21	21	19	21	21	19	1.0943	0.99566	24.067	47	0	1.4588	17.605	15	0	0.97648	19.941	17	0	0.99992	32.038	15	0	30.8	34.9	30.4
Q2G0R1	Q2G0R1	Hypoxanthine phosphoribosyltransferase	>tr|Q2G0R1|Q2G0R1_STAA8 Hypoxanthine phosphoribosyltransferase OS=Staphylococcus aureus (strain NCTC 8325) GN=SAOUHSC_00485 PE=4 SV=1	-0.0765941	0.0753061	0.569686	-0.558368	-0.2411		4	4	4	28.5	28.5	28.5	0	30.479	4	4	4	2	3	3	2	3	3	2	3	3	0.8975	0.81991	64.585	6	0	2.1432	88.369	2	0	0.69874	1.2406	2	1	0.80726	52.39	3	0	17.3	22.3	20.1
Q2G0R6	Q2G0R6	Putative uncharacterized protein	>tr|Q2G0R6|Q2G0R6_STAA8 Putative uncharacterized protein OS=Staphylococcus aureus (strain NCTC 8325) GN=SAOUHSC_00480 PE=4 SV=1	-0.176605	0.133477	-0.576755	0.223546	NaN		5	5	5	17.1	17.1	17.1	0	3.9546	5	5	5	2	5	2	2	5	2	2	5	2	1.0633	1.0278	61.771	6	5	0.93231	94.113	2	1	1.1864	43.937	3	3	NaN	NaN	1	1	5.8	17.1	7.1
Q2G0R8	Q2G0R8	Transcription-repair-coupling factor	>sp|Q2G0R8|MFD_STAA8 Transcription-repair-coupling factor OS=Staphylococcus aureus (strain NCTC 8325) GN=mfd PE=3 SV=1	-0.261642	0.378613	0.137635	-0.746083	-0.176479		8	8	8	6.5	6.5	6.5	0	5.4787	8	8	8	4	6	3	4	6	3	4	6	3	0.80461	0.84464	113.3	10	10	1.5054	201.09	3	3	0.59295	88.202	4	4	0.83162	33.221	3	3	2.9	5.3	2.8
Q2G0S0	Q2G0S0	50S ribosomal protein L25	>tr|Q2G0S0|Q2G0S0_STAA8 50S ribosomal protein L25 OS=Staphylococcus aureus (strain NCTC 8325) GN=rplY PE=3 SV=1	-0.381904	0.23444	0.664392	-1.37135	-0.438757		8	8	8	41.9	41.9	41.9	0	63.546	8	8	8	6	5	6	6	5	6	6	5	6	0.75811	0.74149	65.18	11	0	2.4726	10.834	3	0	0.40185	52.442	4	0	0.68447	32.464	4	0	38.2	33.2	35.9
Q2G0S2	Q2G0S2	Ribose-phosphate pyrophosphokinase	>tr|Q2G0S2|Q2G0S2_STAA8 Ribose-phosphate pyrophosphokinase OS=Staphylococcus aureus (strain NCTC 8325) GN=prs PE=3 SV=1	0.194766	0.870064	0.0886844	0.144438	0.351176		12	12	12	51.1	51.1	51.1	0	140.75	12	12	12	10	9	10	10	9	10	10	9	10	1.3278	1.1473	26.622	29	0	1.6106	31.023	10	0	1.1738	20.344	9	0	1.2275	28.745	10	0	40.5	36.1	43.9
Q2G0S3	Q2G0S3	Bifunctional protein GlmU	>sp|Q2G0S3|GLMU_STAA8 Bifunctional protein GlmU OS=Staphylococcus aureus (strain NCTC 8325) GN=glmU PE=3 SV=1	0.117942	0.73459	0.235359	0.0469799	0.0714881		9	9	9	36.2	36.2	36.2	0	203.73	9	9	9	8	8	7	8	8	7	8	8	7	1.1211	1.0649	22.711	19	0	1.7235	30.613	8	0	1.0701	17.421	6	0	0.96372	14.024	5	0	28	32.4	25.1
Q2G0S5	Q2G0S5	Putative septation protein SpoVG	>sp|Q2G0S5|SP5G_STAA8 Putative septation protein SpoVG OS=Staphylococcus aureus (strain NCTC 8325) GN=spoVG PE=3 SV=1	-0.248945	0.1674	0.633664	-1.1713	-0.209195		5	5	5	65	65	65	0	39.005	5	5	5	4	3	4	4	3	4	4	3	4	1.6032	1.3597	57.226	5	0	2.2341	13.6	5	3	0.44679	72.525	3	3	0.81608	69.874	3	0	38	28	55
Q2G0T4	Q2G0T4	Nucleoid-associated protein SAOUHSC_00444	>sp|Q2G0T4|Y444_STAA8 Nucleoid-associated protein SAOUHSC_00444 OS=Staphylococcus aureus (strain NCTC 8325) GN=SAOUHSC_00444 PE=3 SV=1	-0.0175818	0.0208643	0.451752	-0.464564	-0.0399332		4	4	4	43.8	43.8	43.8	0	48.137	4	4	4	4	3	3	4	3	3	4	3	3	1.0545	0.96681	38.907	8	0	2.0225	43.333	3	0	0.73934	24.447	3	0	0.94404	57.557	5	3	43.8	34.3	36.2
Q2G0T5	Q2G0T5	DNA polymerase III, gamma and tau subunits, putative	>tr|Q2G0T5|Q2G0T5_STAA8 DNA polymerase III, gamma and tau subunits, putative OS=Staphylococcus aureus (strain NCTC 8325) GN=SAOUHSC_00442 PE=4 SV=1	0.404739	0.508395	NaN	0.619178	0.190299		4	4	4	7	7	7	0	6.5381	4	4	4	1	3	4	1	3	4	1	3	4	1.0581	1.1198	64.949	5	0	NaN	NaN	1	0	1.5281	26.275	3	1	1.0661	1.6589	3	1	2	5	7
Q2G0T9	Q2G0T9	Alpha amylase family protein, putative	>tr|Q2G0T9|Q2G0T9_STAA8 Alpha amylase family protein, putative OS=Staphylococcus aureus (strain NCTC 8325) GN=SAOUHSC_00438 PE=4 SV=1	-0.189612	1.20565	-0.2881	-0.151618	-0.129118		15	15	15	28.2	28.2	28.2	0	116	15	15	15	11	11	13	11	11	13	11	11	13	0.94873	0.89846	27.454	24	0	1.1832	39.639	7	0	0.90865	17.461	8	0	0.89665	26.328	9	0	21.2	22.7	26.4
Q2G0U0	Q2G0U0	Putative uncharacterized protein	>tr|Q2G0U0|Q2G0U0_STAA8 Putative uncharacterized protein OS=Staphylococcus aureus (strain NCTC 8325) GN=SAOUHSC_00437 PE=4 SV=1	-0.09458	0.859321	-0.161121	-0.0977798	-0.0248394		9	9	9	20.2	20.2	20.2	0	107.61	9	9	9	8	8	7	8	8	7	8	8	7	1.0508	0.93332	30.201	24	0	1.3795	31.063	9	0	1.022	19.835	7	0	0.94726	35.275	8	0	19.4	17.3	16.6
Q2G0V7	Q2G0V7	Putative uncharacterized protein	>tr|Q2G0V7|Q2G0V7_STAA8 Putative uncharacterized protein OS=Staphylococcus aureus (strain NCTC 8325) GN=SAOUHSC_00417 PE=4 SV=1	0.0608097	0.385838	0.132511	-0.0562962	0.106214		8	8	8	52	52	52	0	43.034	8	8	8	7	5	6	7	5	6	7	5	6	1.039	1.0274	25.245	14	0	1.5147	38.689	5	0	0.98375	14.686	4	0	1.0313	19.073	5	0	45.1	34.4	38.1
Q2G0W1	Q2G0W1	UPF0753 protein SAOUHSC_00413	>sp|Q2G0W1|Y413_STAA8 UPF0753 protein SAOUHSC_00413 OS=Staphylococcus aureus (strain NCTC 8325) GN=SAOUHSC_00413 PE=3 SV=1	0.0403517	0.149796	0.130799	-0.146723	0.136979		14	14	14	16.4	16.4	16.4	0	41.709	14	14	14	10	11	4	10	11	4	10	11	4	1.2442	0.96856	39.155	17	0	1.5792	37.974	6	0	0.93249	37.671	9	0	1.0476	40.755	4	2	12.7	12.2	5.1
Q2G0W2	Q2G0W2	NADH dehydrogenase subunit 5, putative	>tr|Q2G0W2|Q2G0W2_STAA8 NADH dehydrogenase subunit 5, putative OS=Staphylococcus aureus (strain NCTC 8325) GN=SAOUHSC_00412 PE=4 SV=1	-0.197865	0.856765	-0.350909	-0.17555	-0.0671376		3	3	3	5.5	5.5	5.5	0	7.8709	3	3	3	2	3	3	2	3	3	2	3	3	0.93541	0.89688	11.065	10	0	1.0595	13.287	3	0	0.90881	6.0609	3	0	0.87669	7.3838	4	0	2.2	5.5	5.5
Q2G0W9	Q2G0W9	Uncharacterized lipoprotein SAOUHSC_00405	>sp|Q2G0W9|Y405_STAA8 Uncharacterized lipoprotein SAOUHSC_00405 OS=Staphylococcus aureus (strain NCTC 8325) GN=SAOUHSC_00405 PE=3 SV=2	-0.269314	0.211891	0.626579	-0.855484	-0.579038		8	8	8	42.2	42.2	42.2	0	24.18	8	8	8	8	3	4	8	3	4	8	3	4	1.286	0.95847	71.635	3	0	2.0287	36.996	7	6	0.55149	11.351	2	2	0.64116	77.48	3	1	42.2	14.4	20.7
Q2G0Y6	Q2G0Y6	GMP synthase [glutamine-hydrolyzing]	>sp|Q2G0Y6|GUAA_STAA8 GMP synthase [glutamine-hydrolyzing] OS=Staphylococcus aureus (strain NCTC 8325) GN=guaA PE=3 SV=1	-0.0254784	0.104171	0.139339	-0.10002	-0.115754		31	31	31	67.4	67.4	67.4	0	323.31	31	31	31	26	30	27	26	30	27	26	30	27	1.1302	0.96915	35.21	106	0	1.6246	24.913	38	0	0.96375	29.987	36	0	0.87134	43.998	32	0	57.1	64.1	54
Q2G0Y7	Q2G0Y7	Inosine-5-monophosphate dehydrogenase	>sp|Q2G0Y7|IMDH_STAA8 Inosine-5-monophosphate dehydrogenase OS=Staphylococcus aureus (strain NCTC 8325) GN=guaB PE=3 SV=1	-0.120476	1.1182	-0.0554414	-0.129197	-0.176789		53	53	53	94.5	94.5	94.5	0	323.31	53	53	53	45	49	48	45	49	48	45	49	48	1.053	0.93511	34.386	166	0	1.4429	19.201	54	0	0.98181	32.514	57	0	0.85658	44.732	55	0	81.8	93.9	93.4
Q2G0Y9	Q2G0Y9	Xanthine phosphoribosyltransferase	>sp|Q2G0Y9|XPT_STAA8 Xanthine phosphoribosyltransferase OS=Staphylococcus aureus (strain NCTC 8325) GN=xpt PE=3 SV=1	0.0286576	0.578727	0.0067647	0.0657101	0.013498		12	12	12	58.3	58.3	58.3	0	128.73	12	12	12	10	12	12	10	12	12	10	12	12	1.1228	1.0068	29.683	35	0	1.448	35.35	11	0	1.0961	13.852	12	0	0.99914	34.202	12	0	50	58.3	58.3
Q2G0Z0	Q2G0Z0	Putative uncharacterized protein	>tr|Q2G0Z0|Q2G0Z0_STAA8 Putative uncharacterized protein OS=Staphylococcus aureus (strain NCTC 8325) GN=SAOUHSC_00371 PE=4 SV=1	-0.0678719	0.0638168	0.499986	-0.700005	-0.00359677		13	13	13	90.4	90.4	90.4	0	295.27	13	13	13	10	11	13	10	11	13	10	11	13	0.96666	1.023	51.777	35	0	2.086	20.806	11	0	0.65353	39.818	12	0	0.94935	53.761	12	0	85.9	85.9	90.4
Q2G0Z2	Q2G0Z2	Putative uncharacterized protein	>tr|Q2G0Z2|Q2G0Z2_STAA8 Putative uncharacterized protein OS=Staphylococcus aureus (strain NCTC 8325) GN=SAOUHSC_00369 PE=4 SV=1	-0.0528601	0.0983209	0.298072	-0.153768	-0.302884		13	13	13	62.9	62.9	62.9	0	145.78	13	13	13	8	5	10	8	5	10	8	5	10	0.99991	1.0206	37.552	13	0	1.7687	19.317	4	0	0.89162	10.253	3	0	0.76115	51.86	6	0	34.9	32.4	57.2
Q2G0Z4	Q2G0Z4	Putative uncharacterized protein	>tr|Q2G0Z4|Q2G0Z4_STAA8 Putative uncharacterized protein OS=Staphylococcus aureus (strain NCTC 8325) GN=SAOUHSC_00367 PE=4 SV=1	-0.425318	0.678228	-0.0705877	-0.865017	-0.340349		4	4	4	10.8	10.8	10.8	0	49.855	4	4	4	4	4	4	4	4	4	4	4	4	0.99741	0.8941	38.623	5	0	1.3981	111.35	5	3	0.56824	101.36	5	3	0.75684	78.683	5	4	10.8	10.8	10.8
Q2G0Z5	Q2G0Z5	NADPH-dependent oxidoreductase	>sp|Q2G0Z5|NRFA_STAA8 NADPH-dependent oxidoreductase OS=Staphylococcus aureus (strain NCTC 8325) GN=nfrA PE=1 SV=1	-0.178461	0.398652	0.124461	-0.20415	-0.455693		7	7	7	28.7	28.7	28.7	0	86.87	7	7	7	5	7	6	5	7	6	5	7	6	0.81906	0.81795	26.603	10	0	1.6035	8.2459	3	0	0.90215	32.26	7	5	0.65922	21.814	5	0	17.9	28.7	28.3
Q2G104	Q2G104	Putative uncharacterized protein	>tr|Q2G104|Q2G104_STAA8 Putative uncharacterized protein OS=Staphylococcus aureus (strain NCTC 8325) GN=SAOUHSC_00357 PE=4 SV=1	-0.232716	0.074084	1.58135	-0.271688	-2.00781		5	5	5	43.7	43.7	43.7	0	12.163	5	5	5	3	2	4	3	2	4	3	2	4	1.0201	0.91417	181.9	12	12	4.3373	117.77	4	4	0.83546	175.07	4	4	0.23998	269.1	4	4	31	29.9	41.4
Q2G111	Q2G111	30S ribosomal protein S18	>sp|Q2G111|RS18_STAA8 30S ribosomal protein S18 OS=Staphylococcus aureus (strain NCTC 8325) GN=rpsR PE=3 SV=1	0.152971	0.0605462	-1.46929	0.711407	1.2168		9	9	9	78.8	78.8	78.8	0	9.2479	9	9	9	5	6	8	5	6	8	5	6	8	2.155	2.3243	78.024	3	0	0.53352	308.18	8	8	1.6688	256.35	12	11	2.155	232.83	13	11	33.8	37.5	78.8
Q2G112	Q2G112	Single-stranded DNA-binding protein	>tr|Q2G112|Q2G112_STAA8 Single-stranded DNA-binding protein OS=Staphylococcus aureus (strain NCTC 8325) GN=SAOUHSC_00349 PE=3 SV=1	0.109754	0.131577	0.629193	0.059909	-0.359842		4	4	4	35.3	35.3	35.3	0	65.759	4	4	4	4	3	4	4	3	4	4	3	4	1.0107	1.0424	65.986	5	0	2.1171	42.166	5	4	1.0276	58.948	3	1	0.72623	49.233	4	2	35.3	17.4	35.3
Q2G113	Q2G113	30S ribosomal protein S6	>sp|Q2G113|RS6_STAA8 30S ribosomal protein S6 OS=Staphylococcus aureus (strain NCTC 8325) GN=rpsF PE=3 SV=1	-0.102643	0.106781	0.516822	-0.582663	-0.242089		10	10	10	78.6	78.6	78.6	0	140.92	10	10	10	8	10	10	8	10	10	8	10	10	1.063	1.0127	62.762	23	0	2.178	33.052	6	0	0.66776	32.63	9	0	0.81308	90.451	8	0	71.4	78.6	78.6
Q2G115	Q2G115	Ribosome-binding ATPase YchF	>tr|Q2G115|Q2G115_STAA8 Ribosome-binding ATPase YchF OS=Staphylococcus aureus (strain NCTC 8325) GN=ychF PE=3 SV=1	0.0886622	0.556077	-0.0209844	0.100978	0.185993		15	15	15	54.2	54.2	54.2	0	322.4	15	15	15	14	11	12	14	11	12	14	11	12	1.2001	1.0725	33.803	25	0	1.3902	16.513	9	0	1.1338	24.834	9	0	1.0813	48.666	7	0	52.3	40.5	42.5
Q2G122	Q2G122	5-methyltetrahydropteroyltriglutamate--homocysteine methyltransferase	>sp|Q2G122|METE_STAA8 5-methyltetrahydropteroyltriglutamate--homocysteine methyltransferase OS=Staphylococcus aureus (strain NCTC 8325) GN=metE PE=3 SV=1	-0.114895	0.446694	0.0749164	-0.175908	-0.243694		30	30	30	42.5	42.5	42.5	0	174.18	30	30	30	25	22	23	25	22	23	25	22	23	0.94123	0.90604	20.157	38	0	1.5603	21.179	12	0	0.89712	20.588	15	0	0.79428	15.151	11	0	36.5	34.9	35.2
Q2G124	Q2G124	Probable acetyl-CoA acyltransferase	>sp|Q2G124|THLA_STAA8 Probable acetyl-CoA acyltransferase OS=Staphylococcus aureus (strain NCTC 8325) GN=SAOUHSC_00336 PE=3 SV=1	-0.141439	0.610489	0.0312541	-0.210613	-0.244959		12	12	12	41	41	41	0	158.97	12	12	12	10	11	12	10	11	12	10	11	12	1.0257	0.96537	22.647	32	0	1.4552	20.109	12	0	0.89242	22.593	10	0	0.81084	23.942	10	0	33.1	41	41
Q2G132	Q2G132	Ribosomal-protein-serine acetyltransferase, putative	>tr|Q2G132|Q2G132_STAA8 Ribosomal-protein-serine acetyltransferase, putative OS=Staphylococcus aureus (strain NCTC 8325) GN=SAOUHSC_00324 PE=4 SV=1	-0.334601	0.382116	0.189919	-0.937713	-0.256011		5	5	5	33.1	33.1	33.1	0	49.537	5	5	5	5	3	5	5	3	5	5	3	5	1.0483	0.97852	32.709	10	0	1.6368	18.135	4	0	0.55737	43.145	3	1	0.80618	29.455	4	0	33.1	22.7	33.1
Q2G138	Q2G138	Glycerol-3-phosphate transporter	>tr|Q2G138|Q2G138_STAA8 Glycerol-3-phosphate transporter OS=Staphylococcus aureus (strain NCTC 8325) GN=SAOUHSC_00317 PE=4 SV=1	0.153404	0.0766731	0.302173	-1.05931	1.21735		3	3	3	7.1	7.1	7.1	0	2.539	3	3	3	2	3	2	2	3	2	2	3	2	1.5528	1.233	65.702	8	7	1.7467	1.7594	2	1	0.47287	64.925	3	3	2.1874	62.095	3	3	3.8	7.1	3.8
Q2G144	Q2G144	Putative uncharacterized protein	>tr|Q2G144|Q2G144_STAA8 Putative uncharacterized protein OS=Staphylococcus aureus (strain NCTC 8325) GN=SAOUHSC_00311 PE=4 SV=1	-0.0108198	0.0226744	0.063779	-0.300129	0.20389		4	4	4	59.6	59.6	59.6	0	39.541	4	4	4	4	3	3	4	3	3	4	3	3	1.0825	1.0452	35.035	9	0	1.4301	0.59774	3	0	0.79842	16.453	3	0	1.0825	63.983	3	0	59.6	27.7	27.7
Q2G145	Q2G145	Putative uncharacterized protein	>tr|Q2G145|Q2G145_STAA8 Putative uncharacterized protein OS=Staphylococcus aureus (strain NCTC 8325) GN=SAOUHSC_00310 PE=4 SV=1	-0.341218	0.65285	-0.0938175	-0.726233	-0.203602		2	2	2	3.6	3.6	3.6	0	4.5119	2	2	2	2	2	2	2	2	2	2	2	2	0.85606	0.90692	9.4233	5	0	1.348	3.8602	2	0	0.60884	31.88	2	1	0.81309	6.1405	2	0	3.6	3.6	3.6
Q2G155	Q2G155	Lipase 2	>sp|Q2G155|LIP2_STAA8 Lipase 2 OS=Staphylococcus aureus (strain NCTC 8325) GN=lip2 PE=1 SV=1	0.150972	0.0718904	-0.590506	1.53287	-0.489443		24	24	22	41	41	37.7	0	195.84	24	24	22	16	19	17	16	19	17	14	18	15	0.98413	0.69579	75.842	25	0	0.9268	37.097	14	0	2.9147	74.027	3	0	0.66535	87.74	8	0	32.5	32.2	37
Q2G157	Q2G157	Putative N-acetylmannosamine-6-phosphate 2-epimerase	>sp|Q2G157|NANE_STAA8 Putative N-acetylmannosamine-6-phosphate 2-epimerase OS=Staphylococcus aureus (strain NCTC 8325) GN=nanE PE=3 SV=1	-0.109103	0.298482	-0.35369	0.110898	-0.0845174		9	9	9	39.6	39.6	39.6	0	36.814	9	9	9	5	6	8	5	6	8	5	6	8	1.0103	0.9431	25.33	17	0	1.071	18.942	5	0	1.0649	11.28	5	0	0.85304	29.448	7	0	28.4	34.7	39.6
Q2G159	Q2G159	ROK family protein	>tr|Q2G159|Q2G159_STAA8 ROK family protein OS=Staphylococcus aureus (strain NCTC 8325) GN=SAOUHSC_00296 PE=4 SV=1	0.0698414	0.241227	-0.026881	0.279293	-0.0428878		7	7	7	34.6	34.6	34.6	0	22.922	7	7	7	3	4	7	3	4	7	3	4	7	1.2169	0.98154	27.26	9	0	1.418	44.738	3	2	1.2169	28.831	3	0	0.90341	32.425	5	0	18.9	16.8	34.6
Q2G160	Q2G160	N-acetylneuraminate lyase	>sp|Q2G160|NANA_STAA8 N-acetylneuraminate lyase OS=Staphylococcus aureus (strain NCTC 8325) GN=nanA PE=1 SV=1	-0.117483	0.0686408	0.561008	-1.23307	0.319618		7	7	7	21.2	21.2	21.2	0	33.45	7	7	7	3	3	6	3	3	6	3	3	6	0.8354	0.84893	54.228	4	0	1.8716	144.32	3	2	0.43483	20.318	3	2	1.1884	88.934	5	3	13.3	7.2	21.2
Q2G170	Q2G170	5-nucleotidase, lipoprotein e(P4) family	>tr|Q2G170|Q2G170_STAA8 5-nucleotidase, lipoprotein e(P4) family OS=Staphylococcus aureus (strain NCTC 8325) GN=SAOUHSC_00284 PE=4 SV=1	0.288399	0.177146	1.33096	0.181929	-0.647693		8	8	8	28.7	28.7	28.7	0	18.315	8	8	8	6	3	4	6	3	4	6	3	4	1.0855	1.0579	64.005	7	0	3.2622	5.5784	3	0	1.1866	64.721	4	2	0.61964	43.904	5	3	24.3	10.5	17.2
Q2G178	Q2G178	Putative uncharacterized protein	>tr|Q2G178|Q2G178_STAA8 Putative uncharacterized protein OS=Staphylococcus aureus (strain NCTC 8325) GN=SAOUHSC_00269 PE=4 SV=1	-0.0892159	0.0600201	-1.05505	0.464668	0.322736		4	4	3	34.4	34.4	34.4	0	36.216	4	4	3	3	4	4	3	4	4	2	3	3	1.2882	1.2452	81.136	11	9	0.74505	88.424	2	2	1.3507	67.33	5	4	1.197	89.731	4	3	13.5	34.4	34.4
Q2G189	Q2G189	ESAT-6-like protein	>tr|Q2G189|Q2G189_STAA8 ESAT-6-like protein OS=Staphylococcus aureus (strain NCTC 8325) GN=SAOUHSC_00257 PE=3 SV=1	-0.341879	0.711899	-0.01105	-0.395226	-0.619359		12	12	12	94.8	94.8	94.8	0	46.051	12	12	12	9	8	9	9	8	9	9	8	9	1.0039	0.83401	47.905	15	0	1.4638	21.238	4	0	0.81295	34.259	6	0	0.60775	77.334	5	0	92.8	94.8	94.8
Q2G1A6	Q2G1A6	Ribokinase, putative	>tr|Q2G1A6|Q2G1A6_STAA8 Ribokinase, putative OS=Staphylococcus aureus (strain NCTC 8325) GN=SAOUHSC_00239 PE=3 SV=1	0.124044	0.0511799	0.827169	NaN	-0.579081		3	3	3	13.2	13.2	13.2	0	5.6955	3	3	3	3	1	1	3	1	1	3	1	1	0.60214	0.61403	69.075	3	0	2.3654	48.252	3	2	NaN	NaN	1	0	0.64937	45.529	2	1	13.2	4.9	4.9
Q2G1A9	Q2G1A9	6-phospho-beta-glucosidase, putative	>tr|Q2G1A9|Q2G1A9_STAA8 6-phospho-beta-glucosidase, putative OS=Staphylococcus aureus (strain NCTC 8325) GN=SAOUHSC_00236 PE=3 SV=1	-0.169837	2.36602	-0.178306	-0.183523	-0.147681		14	14	14	30.5	30.5	30.5	0	109.11	14	14	14	11	10	12	11	10	12	11	10	12	1.0426	0.88215	19.183	26	0	1.3308	14.018	9	0	0.96886	16.648	7	0	0.88133	25.589	10	0	28.7	22.2	25.1
Q2G1B7	Q2G1B7	Putative uncharacterized protein	>tr|Q2G1B7|Q2G1B7_STAA8 Putative uncharacterized protein OS=Staphylococcus aureus (strain NCTC 8325) GN=SAOUHSC_00228 PE=4 SV=1	-0.000311953	0.00173391	-0.0213211	-0.0839515	0.104337		24	24	24	47.9	47.9	47.9	0	253.05	24	24	24	20	18	16	20	18	16	20	18	16	1.1358	1.0064	28.582	40	0	1.4254	20.683	14	0	0.96389	24.542	14	0	1.0034	40.058	12	0	40.8	39.2	33.3
Q2G1B8	Q2G1B8	Putative uncharacterized protein	>tr|Q2G1B8|Q2G1B8_STAA8 Putative uncharacterized protein OS=Staphylococcus aureus (strain NCTC 8325) GN=SAOUHSC_00227 PE=4 SV=1	0.0670139	0.0651978	-0.234126	NaN	0.368154		14	8	8	31.7	18.9	18.9	0	22.075	14	8	8	9	9	8	4	3	3	4	3	3	1.1514	0.93829	28.041	7	0	1.1514	26.544	3	0	NaN	NaN	1	0	1.2428	32.351	3	0	22.2	19.9	18
Q2G1B9	Q2G1B9	Putative uncharacterized protein	>tr|Q2G1B9|Q2G1B9_STAA8 Putative uncharacterized protein OS=Staphylococcus aureus (strain NCTC 8325) GN=SAOUHSC_00226 PE=4 SV=1	0.0981759	0.25632	0.351741	0.0717627	-0.128977		7	7	5	31.4	31.4	25.2	0	39.837	7	7	5	6	7	6	6	7	6	4	5	4	1.1078	1.051	30.931	13	0	1.8066	26.886	4	0	1.0861	36.923	5	0	0.85167	15.294	4	0	27	31.4	27
Q2G1C0	Q2G1C0	2-C-methyl-D-erythritol 4-phosphate cytidylyltransferase	>sp|Q2G1C0|ISPD_STAA8 2-C-methyl-D-erythritol 4-phosphate cytidylyltransferase OS=Staphylococcus aureus (strain NCTC 8325) GN=ispD PE=3 SV=1	0.122179	0.496757	0.304511	0.00100953	0.0610158		17	17	14	95	95	88.2	0	154.12	17	17	14	15	15	14	15	15	14	12	12	11	1.1487	1.079	31.417	39	0	1.7987	27.712	13	0	1.0671	29.504	14	0	1.0006	35.577	12	0	91.2	85.3	86.1
Q2G1C2	Q2G1C2	TagB protein, putative	>tr|Q2G1C2|Q2G1C2_STAA8 TagB protein, putative OS=Staphylococcus aureus (strain NCTC 8325) GN=SAOUHSC_00222 PE=4 SV=1	-0.0999986	0.812065	-0.0481139	-0.188759	-0.0631228		17	17	11	41.7	41.7	27.7	0	101.62	17	17	11	14	16	13	14	16	13	9	10	8	1.0141	0.93186	19.738	32	0	1.3861	15.741	11	0	0.86759	22.293	11	0	0.90091	19.012	10	0	29.2	39.8	30.6
Q2G1C6	Q2G1C6	Acetate CoA-transferase YdiF	>tr|Q2G1C6|Q2G1C6_STAA8 Acetate CoA-transferase YdiF OS=Staphylococcus aureus (strain NCTC 8325) GN=SAOUHSC_00199 PE=3 SV=1	-0.199051	0.94458	-0.342323	-0.0988454	-0.155984		20	20	20	46.5	46.5	46.5	0	220.52	20	20	20	19	16	16	19	16	16	19	16	16	1.0007	0.87148	34.649	49	0	1.1772	18.113	17	0	1.0145	35.706	17	0	0.85596	47.009	15	0	46.5	39.2	45
Q2G1C7	Q2G1C7	Putative uncharacterized protein	>tr|Q2G1C7|Q2G1C7_STAA8 Putative uncharacterized protein OS=Staphylococcus aureus (strain NCTC 8325) GN=SAOUHSC_00198 PE=4 SV=1	-0.0479446	0.226197	-0.198527	0.0057592	0.0489336		26	26	26	61.5	61.5	61.5	0	323.31	26	26	26	20	25	21	20	25	21	20	25	21	1.0817	0.99674	27.319	65	0	1.321	24.371	18	0	1.0598	24.696	24	0	1.004	30.496	23	0	47.9	60.7	43.3
Q2G1C8	Q2G1C8	Putative uncharacterized protein	>tr|Q2G1C8|Q2G1C8_STAA8 Putative uncharacterized protein OS=Staphylococcus aureus (strain NCTC 8325) GN=SAOUHSC_00197 PE=3 SV=1	-0.168923	1.3888	-0.121424	-0.237745	-0.147602		32	32	32	81.4	81.4	81.4	0	323.31	32	32	32	30	29	29	30	29	29	30	29	29	1.0398	0.90742	37.44	129	0	1.3598	23.149	45	0	0.90758	29.787	43	0	0.87299	53.232	41	0	78.9	78.9	79.2
Q2G1C9	Q2G1C9	Putative uncharacterized protein	>tr|Q2G1C9|Q2G1C9_STAA8 Putative uncharacterized protein OS=Staphylococcus aureus (strain NCTC 8325) GN=SAOUHSC_00196 PE=3 SV=1	-0.0874825	1.10848	-0.0362596	-0.105768	-0.12042		65	65	65	64.8	64.8	64.8	0	323.31	65	65	65	56	58	64	56	58	64	56	58	64	1.065	0.94687	64.921	249	0	1.4501	55.948	75	0	1.007	53.328	85	0	0.89904	80.425	89	0	59.5	59.8	61.8
Q2G1D0	Q2G1D0	Acetyl-CoA acetyltransferase, putative	>tr|Q2G1D0|Q2G1D0_STAA8 Acetyl-CoA acetyltransferase, putative OS=Staphylococcus aureus (strain NCTC 8325) GN=SAOUHSC_00195 PE=3 SV=1	0.124248	0.418772	0.347325	0.0154976	0.00992034		19	19	19	53	53	53	0	323.31	19	19	19	17	18	19	17	18	19	17	18	19	1.2573	1.0664	28.28	82	0	1.8767	21.352	28	0	1.0871	31.202	27	0	0.96022	29.172	27	0	51.8	53	53
Q2G1D8	Q2G1D8	Formate acetyltransferase	>sp|Q2G1D8|PFLB_STAA8 Formate acetyltransferase OS=Staphylococcus aureus (strain NCTC 8325) GN=pflB PE=3 SV=1	0.103761	0.273167	0.22404	0.260628	-0.173384		48	48	48	65.3	65.3	65.3	0	323.31	48	48	48	45	45	44	45	45	44	45	45	44	1.3763	1.1053	51.48	129	0	1.7472	29.396	48	0	1.2684	41.46	42	0	0.8501	67.122	39	0	63.3	61.5	63.4
Q2G1E4	Q2G1E4	Putative uncharacterized protein	>tr|Q2G1E4|Q2G1E4_STAA8 Putative uncharacterized protein OS=Staphylococcus aureus (strain NCTC 8325) GN=SAOUHSC_00181 PE=4 SV=1	0.0934291	0.525265	0.0827026	-0.0170375	0.214622		8	8	8	44.4	44.4	44.4	0	108.78	8	8	8	6	6	7	6	6	7	6	6	7	1.2102	1.0558	20.487	20	0	1.6225	15.269	7	0	1.0365	12.544	6	0	1.0898	27.141	7	0	26.7	28.6	35.1
Q2G1E5	Q2G1E5	Putative uncharacterized protein	>tr|Q2G1E5|Q2G1E5_STAA8 Putative uncharacterized protein OS=Staphylococcus aureus (strain NCTC 8325) GN=SAOUHSC_00180 PE=4 SV=1	0.447835	0.748165	0.576861	NaN	0.318809		4	4	4	13.3	13.3	13.3	0	2.2701	4	4	4	2	1	4	2	1	4	2	1	4	1.3828	0.99451	55.894	7	5	2.037	57.325	2	1	NaN	NaN	1	1	1.1895	58.668	4	3	6.4	2.6	13.3
Q2G1E6	Q2G1E6	Putative uncharacterized protein	>tr|Q2G1E6|Q2G1E6_STAA8 Putative uncharacterized protein OS=Staphylococcus aureus (strain NCTC 8325) GN=SAOUHSC_00179 PE=4 SV=1	-0.0917022	0.936631	-0.0693005	-0.0468614	-0.158945		14	14	14	42.5	42.5	42.5	0	169.24	14	14	14	11	8	11	11	8	11	11	8	11	1.0875	0.94035	25.166	20	0	1.3362	22.725	7	0	0.98616	17.324	6	0	0.8417	35.155	7	0	32.1	27.4	39.1
Q2G1F0	Q2G1F0	Multiple sugar-binding transport ATP-binding protein, putative	>tr|Q2G1F0|Q2G1F0_STAA8 Multiple sugar-binding transport ATP-binding protein, putative OS=Staphylococcus aureus (strain NCTC 8325) GN=SAOUHSC_00175 PE=4 SV=1	-0.14606	0.53543	-0.218028	NaN	-0.0740917		4	4	4	14.8	14.8	14.8	0	4.2199	4	4	4	3	2	3	3	2	3	3	2	3	0.35486	0.35836	51.012	3	0	1.1777	8.6205	2	1	NaN	NaN	1	0	0.92594	137.87	2	1	12.3	8.2	11
Q2G1G0	Q2G1G0	Putative uncharacterized protein	>tr|Q2G1G0|Q2G1G0_STAA8 Putative uncharacterized protein OS=Staphylococcus aureus (strain NCTC 8325) GN=SAOUHSC_00164 PE=4 SV=1	0.0739552	0.297556	-0.0779849	0.0614305	0.23842		15	15	15	44	44	44	0	32.906	15	15	15	7	12	12	7	12	12	7	12	12	1.1103	1.0435	18.96	15	0	1.35	2.1797	3	0	1.0839	21.717	7	0	1.1103	22.061	5	0	23.5	40.4	41
Q2G1G2	Q2G1G2	Type I site-specific deoxyribonuclease, HsdR family, putative	>tr|Q2G1G2|Q2G1G2_STAA8 Type I site-specific deoxyribonuclease, HsdR family, putative OS=Staphylococcus aureus (strain NCTC 8325) GN=SAOUHSC_00162 PE=4 SV=1	0.166733	0.745493	0.00475299	0.223423	0.272023		32	32	32	35	35	35	0	203.59	32	32	32	22	25	22	22	25	22	22	25	22	1.2121	1.1095	17.022	35	0	1.4449	18.079	11	0	1.1958	15.96	13	0	1.1756	17.42	11	0	28	28.3	23.8
Q2G1G4	Q2G1G4	Putative uncharacterized protein	>tr|Q2G1G4|Q2G1G4_STAA8 Putative uncharacterized protein OS=Staphylococcus aureus (strain NCTC 8325) GN=SAOUHSC_00160 PE=4 SV=1	0.539377	1.4058	0.690104	0.324811	0.603217		9	9	8	34.4	34.4	31.6	0	37.122	9	9	8	6	5	5	6	5	5	5	4	4	1.3246	1.3664	33.943	9	0	2.3824	44.662	5	3	1.3059	37.781	4	0	1.4116	16.436	3	0	22.3	25.1	26.1
Q2G1G5	Q2G1G5	PTS system EIIBC component SAOUHSC_00158	>sp|Q2G1G5|PTXBC_STAA8 PTS system EIIBC component SAOUHSC_00158 OS=Staphylococcus aureus (strain NCTC 8325) GN=SAOUHSC_00158 PE=3 SV=1	-0.126037	1.18053	-0.0820565	-0.19314	-0.102914		10	10	10	25.2	25.2	25.2	0	225.26	10	10	10	9	10	8	9	10	8	9	10	8	1.0459	0.9285	41.341	46	0	1.4176	21.245	15	0	0.91028	54.976	16	0	0.87134	41.354	15	0	23.1	25.2	23.1
Q2G1G7	Q2G1G7	Putative uncharacterized protein	>tr|Q2G1G7|Q2G1G7_STAA8 Putative uncharacterized protein OS=Staphylococcus aureus (strain NCTC 8325) GN=SAOUHSC_00156 PE=4 SV=1	0.143276	1.952	0.113034	0.162081	0.154713		16	16	16	57.5	57.5	57.5	0	99.231	16	16	16	14	12	15	14	12	15	14	12	15	1.3094	1.1132	39.458	37	0	1.5978	26.037	11	0	1.1566	33.834	11	0	1.1109	51.87	15	0	52.3	37.9	50.6
Q2G1G8	Q2G1G8	PTS system glucose-specific EIICBA component	>sp|Q2G1G8|PTG3C_STAA8 PTS system glucose-specific EIICBA component OS=Staphylococcus aureus (strain NCTC 8325) GN=ptsG PE=3 SV=2	-0.0942843	0.161883	0.128425	-0.500912	0.0896338		20	20	17	37.7	37.7	35.4	0	323.31	20	20	17	18	17	17	18	17	17	15	15	15	1.0959	1.0033	38.661	54	0	1.6459	30.484	21	0	0.74711	40.556	17	0	1.0133	30.939	16	0	34.7	32.7	35.8
Q2G1H0	Q2G1H0	Indolepyruvate decarboxylase, putative	>tr|Q2G1H0|Q2G1H0_STAA8 Indolepyruvate decarboxylase, putative OS=Staphylococcus aureus (strain NCTC 8325) GN=SAOUHSC_00153 PE=3 SV=1	-0.305523	0.652315	0.0241777	-0.369445	-0.5713		20	20	20	53.5	53.5	53.5	0	320.44	20	20	20	16	15	18	16	15	18	16	15	18	0.85209	0.81317	32.158	42	0	1.5146	16.462	14	0	0.803	32.187	15	0	0.62816	30.15	13	0	50.7	43.6	44.5
Q2G1I7	Q2G1I7	Putative uncharacterized protein	>tr|Q2G1I7|Q2G1I7_STAA8 Putative uncharacterized protein OS=Staphylococcus aureus (strain NCTC 8325) GN=SAOUHSC_00135 PE=4 SV=1	-0.0858595	0.206219	0.203264	-0.290692	-0.17015		4	4	4	34.1	34.1	34.1	0	66.321	4	4	4	3	4	3	3	4	3	3	4	3	1.1838	1.1291	28.16	7	0	1.6778	37.992	3	0	0.8369	42.89	4	2	0.85388	32.896	3	1	21.2	34.1	21.2
Q2G1J0	Q2G1J0	Putative aldehyde dehydrogenase AldA	>sp|Q2G1J0|ALDA_STAA8 Putative aldehyde dehydrogenase AldA OS=Staphylococcus aureus (strain NCTC 8325) GN=aldA PE=3 SV=1	0.243376	1.13145	0.370164	0.128161	0.231801		32	32	32	67.3	67.3	67.3	0	323.31	32	32	32	25	30	31	25	30	31	25	30	31	1.2541	1.1549	33.929	104	0	1.9777	22.416	28	0	1.1368	28.099	36	0	1.1172	43.401	40	0	61.8	67.3	67.3
Q2G1J2	Q2G1J2	Heme oxygenase (staphylobilin-producing) 2	>sp|Q2G1J2|HDOX2_STAA8 Heme oxygenase (staphylobilin-producing) 2 OS=Staphylococcus aureus (strain NCTC 8325) GN=isdI PE=1 SV=1	0.375131	1.03067	0.596172	0.169925	0.359296		7	7	7	54.6	54.6	54.6	0	42.068	7	7	7	5	5	4	5	5	4	5	5	4	1.6257	1.5117	41.301	7	0	2.103	45.472	5	3	1.1749	42.607	4	2	1.2139	58.722	3	0	50.9	51.9	36.1
Q2G1M1	Q2G1M1	3-ketoacyl-acyl carrier protein reductase, putative	>tr|Q2G1M1|Q2G1M1_STAA8 3-ketoacyl-acyl carrier protein reductase, putative OS=Staphylococcus aureus (strain NCTC 8325) GN=SAOUHSC_00086 PE=3 SV=1	0.228644	1.03069	0.377957	0.139077	0.168899		13	13	13	64.3	64.3	64.3	0	323.31	13	13	13	12	12	13	12	12	13	12	12	13	1.3341	1.1662	28.711	53	0	1.9675	21.62	17	0	1.1832	25.694	18	0	1.0895	36.891	18	0	63.6	63.6	64.3
Q2G1N7	Q2G1N7	HTH-type transcriptional regulator SarS	>sp|Q2G1N7|SARS_STAA8 HTH-type transcriptional regulator SarS OS=Staphylococcus aureus (strain NCTC 8325) GN=sarS PE=1 SV=1	-0.0908403	0.148287	-0.105116	-0.451682	0.284277		7	7	7	26.4	26.4	26.4	0	66.357	7	7	7	7	6	6	7	6	6	7	6	6	1.113	0.92973	50.627	17	0	1.4287	29.242	7	0	0.77435	25.797	4	0	1.1449	79.974	6	0	26.4	23.6	22.8
Q2G1N9	Q2G1N9	L-lactate permease	>tr|Q2G1N9|Q2G1N9_STAA8 L-lactate permease OS=Staphylococcus aureus (strain NCTC 8325) GN=SAOUHSC_00067 PE=4 SV=1	-0.105556	0.173435	-0.206862	-0.415134	0.305329		4	4	3	6.8	6.8	6.8	0	19.361	4	4	3	4	2	3	4	2	3	3	1	2	1.158	0.86642	23.793	7	0	1.3113	21.866	3	0	0.79084	17.939	3	1	1.158	41.526	3	1	6.8	4.7	4.7
Q2G1P4	Q2G1P4	Putative uncharacterized protein	>tr|Q2G1P4|Q2G1P4_STAA8 Putative uncharacterized protein OS=Staphylococcus aureus (strain NCTC 8325) GN=SAOUHSC_00060 PE=4 SV=1	0.86838	0.435268	0.303693	1.43307	NaN		6	6	6	13.4	13.4	13.4	0	37.554	6	6	6	6	3	1	6	3	1	6	3	1	2.1008	1.7614	47.909	6	0	1.68	8.2028	3	0	2.7061	10.217	2	0	NaN	NaN	1	0	13.4	6.3	1.8
Q2G1Q4	Q2G1Q4	Putative uncharacterized protein	>tr|Q2G1Q4|Q2G1Q4_STAA8 Putative uncharacterized protein OS=Staphylococcus aureus (strain NCTC 8325) GN=SAOUHSC_00049 PE=4 SV=1	0.0914378	1.15566	0.0569996	0.141302	0.0760118		36	36	36	39.8	39.8	39.8	0	249.2	36	36	36	31	31	32	31	31	32	31	31	32	1.1292	1.0573	24.097	67	0	1.518	28.983	20	0	1.1245	17.393	22	0	1.0088	24.427	25	0	34.9	34.3	36.3
Q2G1R9	Q2G1R9	Methionine--tRNA ligase	>tr|Q2G1R9|Q2G1R9_STAA8 Methionine--tRNA ligase OS=Staphylococcus aureus (strain NCTC 8325) GN=metG PE=3 SV=1	0.0551529	0.0546641	0.699907	-0.366504	-0.167944		22	22	22	37.3	37.3	37.3	0	226.07	22	22	22	21	21	19	21	21	19	21	21	19	1.1215	1.0859	51.626	41	0	2.3649	37.08	14	0	0.80316	38.856	15	0	0.81703	47.649	12	0	36.1	37.3	33.2
Q2G1S2	Q2G1S2	Putative uncharacterized protein	>tr|Q2G1S2|Q2G1S2_STAA8 Putative uncharacterized protein OS=Staphylococcus aureus (strain NCTC 8325) GN=SAOUHSC_00462 PE=4 SV=1	0.0293536	0.0120061	1.55125	-0.728789	-0.734395		7	7	7	37.4	37.4	37.4	0	71.282	7	7	7	6	6	4	6	6	4	6	6	4	0.64191	0.62167	47.324	7	0	3.9638	56.178	7	5	0.63717	5.3042	3	0	0.58589	16.092	3	1	28	32.7	20.2
Q2G1S3	Q2G1S3	Adenylosuccinate synthetase	>tr|Q2G1S3|Q2G1S3_STAA8 Adenylosuccinate synthetase OS=Staphylococcus aureus (strain NCTC 8325) GN=purA PE=3 SV=1	0.157061	0.279496	0.532766	0.115566	-0.177147		14	14	14	40	40	40	0	95.91	14	14	14	11	9	9	11	9	9	11	9	9	0.9694	0.96558	29.533	20	0	2.1059	35.884	5	0	1.1127	16.118	7	0	0.82355	18.701	8	0	32.8	27.4	26.7
Q2G1S4	Q2G1S4	Replicative DNA helicase	>tr|Q2G1S4|Q2G1S4_STAA8 Replicative DNA helicase OS=Staphylococcus aureus (strain NCTC 8325) GN=SAOUHSC_00018 PE=4 SV=1	-0.256332	0.520036	NaN	-0.124723	-0.38794		1	1	1	2.4	2.4	2.4	0	2.986	1	1	1	1	1	1	1	1	1	1	1	1	2.0191	2.0785	150.72	5	5	NaN	NaN	1	1	0.91305	221.51	2	2	0.7359	141.5	2	2	2.4	2.4	2.4
Q2G1T6	Q2G1T6	UTP--glucose-1-phosphate uridylyltransferase	>sp|Q2G1T6|GTAB_STAA8 UTP--glucose-1-phosphate uridylyltransferase OS=Staphylococcus aureus (strain NCTC 8325) GN=gtaB PE=1 SV=2	-0.292189	0.157898	0.960067	-1.19063	-0.645999		7	7	7	36.5	36.5	36.5	0	71.156	7	7	7	4	4	6	4	4	6	4	4	6	0.87314	0.87999	55.802	7	0	2.6562	24.644	3	0	0.44831	97.867	2	1	0.61314	31.81	3	0	20.5	25	33.3
Q2G1T9	Q2G1T9	DNA-directed RNA polymerase subunit omega	>sp|Q2G1T9|RPOZ_STAA8 DNA-directed RNA polymerase subunit omega OS=Staphylococcus aureus (strain NCTC 8325) GN=rpoZ PE=3 SV=1	0.105756	0.134062	0.648097	-0.186787	-0.144042		7	7	7	97.2	97.2	97.2	0	24.839	7	7	7	6	5	5	6	5	5	6	5	5	1.0427	0.96421	53.666	11	0	2.3287	35.569	3	0	0.90299	40.62	4	0	0.86105	69.571	4	0	94.4	93.1	83.3
Q2G1U1	Q2G1U1	Fibronectin-binding protein A-related	>tr|Q2G1U1|Q2G1U1_STAA8 Fibronectin-binding protein A-related OS=Staphylococcus aureus (strain NCTC 8325) GN=SAOUHSC_01175 PE=4 SV=1	-0.0951425	0.265705	0.0647449	0.00403388	-0.354206		16	16	16	33.5	33.5	33.5	0	37.381	16	16	16	6	15	13	6	15	13	6	15	13	0.88924	0.87813	27.458	14	0	1.3785	50.318	8	6	1.0137	29.794	7	0	0.75796	9.5933	5	0	12	30.6	28.5
Q2G1U3	Q2G1U3	Oligoendopeptidase F	>tr|Q2G1U3|Q2G1U3_STAA8 Oligoendopeptidase F OS=Staphylococcus aureus (strain NCTC 8325) GN=SAOUHSC_00937 PE=4 SV=1	-0.0497294	0.176832	-0.240128	0.0930192	-0.00207896		40	40	40	64.5	64.5	64.5	0	323.31	40	40	40	37	38	39	37	38	39	37	38	39	1.1154	0.98418	43.127	148	0	1.2734	30.605	46	0	1.1073	34.145	51	0	0.94686	54.619	51	0	58.5	59.1	59.1
Q2G1U6	Q2G1U6	Regulatory protein Spx	>tr|Q2G1U6|Q2G1U6_STAA8 Regulatory protein Spx OS=Staphylococcus aureus (strain NCTC 8325) GN=spxA PE=3 SV=1	0.0609183	0.0833192	0.523361	-0.041046	-0.29956		8	8	8	54.2	54.2	54.2	0	24.594	8	8	8	6	6	7	6	6	7	6	6	7	1.1035	1.0188	45.474	16	0	2.1203	31.735	5	0	1.0278	23.861	5	0	0.75699	58.323	6	0	52.7	48.1	48.1
Q2G1U8	Q2G1U8	Putative uncharacterized protein	>tr|Q2G1U8|Q2G1U8_STAA8 Putative uncharacterized protein OS=Staphylococcus aureus (strain NCTC 8325) GN=SAOUHSC_02690 PE=3 SV=1	0.212425	0.605717	0.299596	0.125254	NaN		2	2	2	4.5	4.5	4.5	0	2.8326	2	2	2	1	2	2	1	2	2	1	2	2	0.98603	0.73147	65.613	5	5	1.6512	73.593	2	2	1.1043	85.104	2	2	NaN	NaN	1	1	2.3	4.5	4.5
Q2G1V8	Q2G1V8	Putative uncharacterized protein	>tr|Q2G1V8|Q2G1V8_STAA8 Putative uncharacterized protein OS=Staphylococcus aureus (strain NCTC 8325) GN=SAOUHSC_02575 PE=4 SV=1	-0.552148	1.10172	-0.242328	-0.607243	-0.806872		2	2	2	10.7	10.7	10.7	0	18.927	2	2	2	2	2	2	2	2	2	2	2	2	0.6715	0.68057	18.96	8	0	1.1874	5.5472	3	0	0.64369	8.0469	3	0	0.55163	5.0751	3	1	10.7	10.7	10.7
Q2G1W0	Q2G1W0	Putative uncharacterized protein	>tr|Q2G1W0|Q2G1W0_STAA8 Putative uncharacterized protein OS=Staphylococcus aureus (strain NCTC 8325) GN=SAOUHSC_02574 PE=4 SV=1	-0.31616	0.619551	0.0650208	-0.47911	-0.534391		12	12	12	38.1	38.1	38.1	0	70.897	12	12	12	10	9	10	10	9	10	10	9	10	1.0836	0.93694	30.163	19	0	1.4436	11.349	9	0	0.72252	31.294	6	0	0.65593	33.184	4	0	33.9	28.9	31.4
Q2G1W2	Q2G1W2	Phosphoenolpyruvate carboxykinase [ATP]	>sp|Q2G1W2|PCKA_STAA8 Phosphoenolpyruvate carboxykinase [ATP] OS=Staphylococcus aureus (strain NCTC 8325) GN=pckA PE=3 SV=1	0.0153717	0.182326	-0.0433188	0.0359054	0.0535284		36	36	36	74.2	74.2	74.2	0	323.31	36	36	36	31	33	33	31	33	33	31	33	33	1.1389	1.0068	25.469	89	0	1.4574	26.627	31	0	1.0762	22.304	30	0	0.98895	26.082	28	0	69.8	72.5	71.5
Q2G1W4	Q2G1W4	S-adenosylmethionine synthase	>sp|Q2G1W4|METK_STAA8 S-adenosylmethionine synthase OS=Staphylococcus aureus (strain NCTC 8325) GN=metK PE=3 SV=1	-0.112533	1.14116	-0.102976	-0.0624899	-0.172132		17	17	17	41.8	41.8	41.8	0	74.857	17	17	17	16	15	15	16	15	15	16	15	15	1.0684	0.92363	30.869	41	0	1.3229	18.16	14	0	0.96017	33.874	13	0	0.85105	38.846	14	0	41.8	37.3	34.5
Q2G1W5	Q2G1W5	Putative uncharacterized protein	>tr|Q2G1W5|Q2G1W5_STAA8 Putative uncharacterized protein OS=Staphylococcus aureus (strain NCTC 8325) GN=SAOUHSC_01908 PE=4 SV=1	-0.189239	0.155626	0.657274	-0.579534	-0.645458		10	10	10	44.7	44.7	44.7	0	137.13	10	10	10	9	6	8	9	6	8	9	6	8	0.66642	0.68484	42.997	18	0	2.1876	12.502	6	0	0.66396	13.778	5	0	0.6149	10.734	7	0	39.7	25.5	34.4
Q2G1X0	Q2G1X0	Alpha-hemolysin	>sp|Q2G1X0|HLA_STAA8 Alpha-hemolysin OS=Staphylococcus aureus (strain NCTC 8325) GN=hly PE=1 SV=1	-0.150173	0.0268388	-1.47065	3.35219	-2.33206		20	20	20	65.2	65.2	65.2	0	152.51	20	20	20	16	14	11	16	14	11	16	14	11	0.52435	0.36879	48.673	8	0	0.49214	35.666	7	0	10.273	105.06	12	11	0.19013	42.614	9	9	57.7	47.3	35.1
Q2G1X1	Q2G1X1	Putative uncharacterized protein	>tr|Q2G1X1|Q2G1X1_STAA8 Putative uncharacterized protein OS=Staphylococcus aureus (strain NCTC 8325) GN=SAOUHSC_01120 PE=4 SV=1	0.0541554	0.0338254	0.97673	-0.782347	-0.0319166		3	3	3	70.1	70.1	70.1	0	113.54	3	3	3	3	3	3	3	3	3	3	3	3	0.92502	0.97812	47.214	7	0	2.7999	30.034	3	1	0.60047	5.0399	3	1	0.92502	12.861	3	0	70.1	70.1	70.1
Q2G1Y0	Q2G1Y0	DNA ligase	>sp|Q2G1Y0|DNLJ_STAA8 DNA ligase OS=Staphylococcus aureus (strain NCTC 8325) GN=ligA PE=3 SV=1	0.0206607	0.0871812	-0.117803	0.024036	0.155749		7	7	7	12.6	12.6	12.6	0	41.708	7	7	7	6	3	3	6	3	3	6	3	3	1.0895	1.0168	18.586	7	0	1.2612	30.004	3	0	0.99899	25.089	3	2	1.0895	7.5108	3	0	10.9	5.4	5.8
Q2G1Y5	Q2G1Y5	L-lactate dehydrogenase 2	>sp|Q2G1Y5|LDH2_STAA8 L-lactate dehydrogenase 2 OS=Staphylococcus aureus (strain NCTC 8325) GN=ldh2 PE=3 SV=1	-0.127164	0.470604	0.0673633	-0.171758	-0.277097		17	17	17	55.5	55.5	55.5	0	323.31	17	17	17	14	17	16	14	17	16	14	17	16	1.044	0.93791	28.976	51	0	1.5758	16.515	17	0	0.93467	27.46	16	0	0.77896	36.317	18	0	55.5	55.5	55.5
Q2G1Y6	Q2G1Y6	GTP-binding protein TypA, putative	>tr|Q2G1Y6|Q2G1Y6_STAA8 GTP-binding protein TypA, putative OS=Staphylococcus aureus (strain NCTC 8325) GN=SAOUHSC_01058 PE=4 SV=1	-0.125889	0.326613	0.158596	-0.29274	-0.243523		14	14	14	29.4	29.4	29.4	0	44.555	14	14	14	12	9	11	12	9	11	12	9	11	1.1201	0.98273	24.881	24	0	1.5325	21.41	9	0	0.82571	24.773	7	0	0.79146	24.521	8	0	23.7	18.2	23.3
Q2G1Y7	Q2G1Y7	Putative uncharacterized protein	>tr|Q2G1Y7|Q2G1Y7_STAA8 Putative uncharacterized protein OS=Staphylococcus aureus (strain NCTC 8325) GN=SAOUHSC_01061 PE=4 SV=1	-0.364737	0.160572	1.18815	-0.857051	-1.42531		6	6	6	58.1	58.1	58.1	0	17.001	6	6	6	4	4	5	4	4	5	4	4	5	0.61961	0.63588	93.877	9	0	3.2954	46.332	6	4	0.54584	49.95	3	0	0.36637	89.678	4	0	42.5	35.6	44.4
Q2G1Z0	Q2G1Z0	Putative uncharacterized protein	>tr|Q2G1Z0|Q2G1Z0_STAA8 Putative uncharacterized protein OS=Staphylococcus aureus (strain NCTC 8325) GN=SAOUHSC_00655 PE=4 SV=1	-0.0494757	0.500003	-0.0588035	-0.10897	0.0193461		8	8	8	23.6	23.6	23.6	0	81.138	8	8	8	8	8	8	8	8	8	8	8	8	1.075	0.96395	13.59	21	0	1.4259	15.042	7	0	0.98078	9.3405	7	0	0.94146	15.547	7	0	23.6	23.6	23.6
Q2G1Z4	Q2G1Z4	Proline--tRNA ligase	>sp|Q2G1Z4|SYP_STAA8 Proline--tRNA ligase OS=Staphylococcus aureus (strain NCTC 8325) GN=proS PE=3 SV=1	-0.243238	1.79932	-0.238136	-0.192249	-0.299329		23	23	23	48.3	48.3	48.3	0	230.14	23	23	23	17	20	20	17	20	20	17	20	20	0.92344	0.86326	25.093	51	0	1.2765	21.277	15	0	0.90394	25.62	19	0	0.79397	27.675	17	0	36.7	43	42
Q2G1Z5	Q2G1Z5	Zinc metalloprotease	>tr|Q2G1Z5|Q2G1Z5_STAA8 Zinc metalloprotease OS=Staphylococcus aureus (strain NCTC 8325) GN=SAOUHSC_01239 PE=3 SV=1	0.141008	0.286773	0.454071	-0.171563	0.140517		3	3	3	9.4	9.4	9.4	0	43.106	3	3	3	3	2	2	3	2	2	3	2	2	1.0078	0.70161	29.907	3	0	1.8965	43.769	4	3	0.88943	37.673	2	0	1.0518	57.089	2	2	9.4	6.9	6.9
Q2G1Z8	Q2G1Z8	DNA polymerase III PolC-type	>sp|Q2G1Z8|DPO3_STAA8 DNA polymerase III PolC-type OS=Staphylococcus aureus (strain NCTC 8325) GN=polC PE=3 SV=1	0.00422369	0.00846649	-0.257528	-0.0076666	0.277866		13	13	13	10.3	10.3	10.3	0	16.422	13	13	13	3	8	10	3	8	10	3	8	10	1.1371	1.1278	41.21	13	0	1.1156	95.298	3	1	1.0179	48.856	6	0	1.1371	37.781	5	0	2	5.8	8
Q2G1Z9	Q2G1Z9	NAD kinase	>sp|Q2G1Z9|NADK_STAA8 NAD kinase OS=Staphylococcus aureus (strain NCTC 8325) GN=nadK PE=3 SV=1	0.0688808	0.327756	0.206393	0.063779	-0.0635297		8	8	8	36.4	36.4	36.4	0	28.055	8	8	8	6	7	7	6	7	7	6	7	7	1.039	1.0452	14.906	10	0	1.5654	11.472	3	0	1.039	17.935	4	0	0.91581	9.498	3	0	27.9	33.5	30.9
Q2G204	Q2G204	GTP pyrophosphokinase, putative	>tr|Q2G204|Q2G204_STAA8 GTP pyrophosphokinase, putative OS=Staphylococcus aureus (strain NCTC 8325) GN=SAOUHSC_00942 PE=4 SV=1	-0.586633	1.25916	-0.381367	-0.515171	-0.863362		9	9	9	56.4	56.4	56.4	0	66.39	9	9	9	7	8	8	7	8	8	7	8	8	0.86575	0.7244	32.278	12	0	1.1656	20.058	5	0	0.70015	32.787	4	0	0.53188	36.941	3	0	46.4	45	50.7
Q2G217	Q2G217	Putative uncharacterized protein	>tr|Q2G217|Q2G217_STAA8 Putative uncharacterized protein OS=Staphylococcus aureus (strain NCTC 8325) GN=SAOUHSC_00211 PE=4 SV=1	0.101566	0.143349	-0.387959	0.322159	0.370499		2	2	2	11.3	11.3	11.3	0	16.316	2	2	2	2	2	2	2	2	2	2	2	2	1.0471	0.90655	32.191	5	0	1.079	24.156	2	0	1.2627	23.364	2	0	1.2511	40.356	3	2	11.3	11.3	11.3
Q2G218	Q2G218	L-lactate dehydrogenase 1	>sp|Q2G218|LDH1_STAA8 L-lactate dehydrogenase 1 OS=Staphylococcus aureus (strain NCTC 8325) GN=ldh1 PE=3 SV=2	-0.244431	0.58409	-0.0227274	-0.161831	-0.548734		13	13	13	48.3	48.3	48.3	0	91.485	13	13	13	13	10	11	13	10	11	13	10	11	1.0986	0.91005	43.083	24	0	1.4469	33.049	10	0	0.93398	15.659	6	0	0.65711	53.503	8	0	48.3	40.7	44.5
Q2G220	Q2G220	Putative uncharacterized protein	>tr|Q2G220|Q2G220_STAA8 Putative uncharacterized protein OS=Staphylococcus aureus (strain NCTC 8325) GN=SAOUHSC_02980 PE=4 SV=1	-0.263271	1.34095	-0.164335	-0.365964	-0.259513		5	5	5	31.7	31.7	31.7	0	142.97	5	5	5	4	4	4	4	4	4	4	4	4	0.86128	0.84369	30.33	13	0	1.3344	29.762	4	0	0.83624	42.277	5	0	0.78451	20.153	4	0	31.7	31.7	25.8
Q2G223	Q2G223	Mannose-6-phosphate isomerase, class I	>tr|Q2G223|Q2G223_STAA8 Mannose-6-phosphate isomerase, class I OS=Staphylococcus aureus (strain NCTC 8325) GN=SAOUHSC_02976 PE=3 SV=1	0.238642	0.110186	0.888383	-0.4111	NaN		3	3	3	8.7	8.7	8.7	0	4.7796	3	3	3	3	3	2	3	3	2	3	3	2	1.2109	1.2693	48.235	7	6	2.4636	57.751	3	3	0.78687	35.644	3	3	NaN	NaN	1	0	8.7	8.7	5.4
Q2G227	Q2G227	Phosphopentomutase	>sp|Q2G227|DEOB_STAA8 Phosphopentomutase OS=Staphylococcus aureus (strain NCTC 8325) GN=deoB PE=3 SV=1	0.0330009	0.236057	-0.0642386	0.0578315	0.10541		13	13	13	42.3	42.3	42.3	0	111.21	13	13	13	11	13	11	11	13	11	11	13	11	1.1858	1.0278	52.629	22	0	1.4896	16.843	7	0	1.0944	28.395	8	0	1.0083	85.443	7	0	37	42.3	35.7
Q2G229	Q2G229	Putative uncharacterized protein	>tr|Q2G229|Q2G229_STAA8 Putative uncharacterized protein OS=Staphylococcus aureus (strain NCTC 8325) GN=SAOUHSC_00452 PE=4 SV=1	0.0375265	0.286272	0.125783	0.0267293	-0.0399332		2	2	2	26.6	26.6	26.6	0	76.958	2	2	2	2	2	2	2	2	2	2	2	2	1.0909	1.0187	12.977	9	0	1.5915	22.106	3	0	1.0909	11.8	3	0	0.93297	5.9768	3	0	26.6	26.6	26.6
Q2G230	Q2G230	Thymidylate kinase	>sp|Q2G230|KTHY_STAA8 Thymidylate kinase OS=Staphylococcus aureus (strain NCTC 8325) GN=tmk PE=3 SV=1	0.0239922	0.238739	-0.0190388	0.0962619	-0.00524649		3	3	3	17.6	17.6	17.6	0	15.331	3	3	3	2	2	3	2	2	3	2	2	3	1.0069	0.95159	19.65	5	0	1.382	5.1512	2	1	1.0481	35.408	2	0	0.95903	8.6912	3	1	14.1	10.7	17.6
Q2G234	Q2G234	Nitric oxide synthase oxygenase	>tr|Q2G234|Q2G234_STAA8 Nitric oxide synthase oxygenase OS=Staphylococcus aureus (strain NCTC 8325) GN=SAOUHSC_02134 PE=3 SV=1	-0.502243	0.875857	-0.91061	-0.2935	-0.302618		4	4	4	12.3	12.3	12.3	0	2.0196	4	4	4	2	2	2	2	2	2	2	2	2	0.8114	0.81078	35.762	7	0	0.8114	61.28	3	0	0.8923	83.805	3	1	0.76491	49.912	3	1	6.4	6.1	6.4
Q2G235	Q2G235	Nicotinate phosphoribosyltransferase	>tr|Q2G235|Q2G235_STAA8 Nicotinate phosphoribosyltransferase OS=Staphylococcus aureus (strain NCTC 8325) GN=SAOUHSC_02133 PE=3 SV=1	0.0128987	0.21558	-0.0275132	0.0206267	0.0455827		26	26	26	57.1	57.1	57.1	0	218.75	26	26	26	22	22	21	22	22	21	22	22	21	1.1386	1.0147	22.303	54	0	1.4529	28.8	18	0	1.0737	15.012	16	0	0.99261	21.588	20	0	48.5	52.9	48.8
Q2G236	Q2G236	NH(3)-dependent NAD(+) synthetase	>sp|Q2G236|NADE_STAA8 NH(3)-dependent NAD(+) synthetase OS=Staphylococcus aureus (strain NCTC 8325) GN=nadE PE=3 SV=1	-0.0625179	0.709187	-0.110402	-0.000202008	-0.0769498		16	16	16	61.5	61.5	61.5	0	183.64	16	16	16	16	14	13	16	14	13	16	14	13	1.1135	0.94806	18.246	34	0	1.3749	20.331	13	0	0.98197	18.614	11	0	0.93409	16.847	10	0	61.5	61.2	52.4
Q2G239	Q2G239	Fructose specific permease, putative	>tr|Q2G239|Q2G239_STAA8 Fructose specific permease, putative OS=Staphylococcus aureus (strain NCTC 8325) GN=SAOUHSC_00708 PE=4 SV=1	0.203552	0.597781	0.0409626	0.113834	0.45586		9	9	9	19.6	19.6	19.6	0	13.954	9	9	9	8	4	7	8	4	7	8	4	7	1.2511	1.0332	49.93	13	0	1.3945	60.158	5	0	1.0979	26.678	4	0	1.3113	38.599	4	0	17.8	6.3	16.4
Q2G241	Q2G241	Glutamate--tRNA ligase	>sp|Q2G241|SYE_STAA8 Glutamate--tRNA ligase OS=Staphylococcus aureus (strain NCTC 8325) GN=gltX PE=3 SV=1	-0.0765051	0.6357	-0.147346	0.00705191	-0.0892213		31	31	31	71.7	71.7	71.7	0	323.31	31	31	31	27	23	28	27	23	28	27	23	28	1.1038	0.94806	36.503	58	0	1.3229	26.913	19	0	1.0395	29.935	19	0	0.88624	49.579	20	0	61.8	61	58.5
Q2G242	Q2G242	Putative uncharacterized protein	>tr|Q2G242|Q2G242_STAA8 Putative uncharacterized protein OS=Staphylococcus aureus (strain NCTC 8325) GN=SAOUHSC_00508 PE=4 SV=1	-0.204466	0.639798	-0.0649175	-0.442262	-0.106218		6	6	6	24.2	24.2	24.2	0	24.029	6	6	6	4	4	3	4	4	3	4	4	3	0.87174	0.91107	16.477	7	0	1.3325	8.2993	3	1	0.73674	17.436	3	0	0.87174	23.617	3	1	12.8	16.8	12.3
Q2G245	Q2G245	Putative uncharacterized protein	>tr|Q2G245|Q2G245_STAA8 Putative uncharacterized protein OS=Staphylococcus aureus (strain NCTC 8325) GN=SAOUHSC_01854 PE=4 SV=1	-0.00449695	0.0153838	0.122871	0.0451634	-0.181526		21	21	21	46.9	46.9	46.9	0	237.43	21	21	21	18	15	17	18	15	17	18	15	17	1.1098	1.0095	32.498	34	0	1.4505	22.457	11	0	1.0358	29.722	12	0	0.85433	43.797	11	0	46.9	38.4	44.2
Q2G247	Q2G247	UPF0478 protein SAOUHSC_01855	>sp|Q2G247|Y1855_STAA8 UPF0478 protein SAOUHSC_01855 OS=Staphylococcus aureus (strain NCTC 8325) GN=SAOUHSC_01855 PE=3 SV=1	0.0209556	0.0183791	0.661476	-0.573682	-0.0249275		13	13	13	68.1	68.1	68.1	0	206.34	13	13	13	11	9	10	11	9	10	11	9	10	1.3696	1.2742	58.155	21	0	2.34	22.011	8	0	0.74079	49.051	7	0	0.92387	83.248	6	0	65.6	55.8	65.6
Q2G248	Q2G248	Putative uncharacterized protein	>tr|Q2G248|Q2G248_STAA8 Putative uncharacterized protein OS=Staphylococcus aureus (strain NCTC 8325) GN=SAOUHSC_01852 PE=4 SV=1	-0.0298712	0.331127	0.0204844	-0.0932941	-0.0168039		17	17	17	45.7	45.7	45.7	0	211.42	17	17	17	15	16	15	15	16	15	15	16	15	1.0928	0.96349	44.656	29	0	1.5544	14.65	10	0	1.0071	45.666	8	0	0.94126	61.774	11	0	44.1	43.8	43.8
Q2G253	Q2G253	Putative uncharacterized protein	>tr|Q2G253|Q2G253_STAA8 Putative uncharacterized protein OS=Staphylococcus aureus (strain NCTC 8325) GN=SAOUHSC_00025 PE=4 SV=1	0.219702	0.663408	0.0557509	0.141825	0.461529		8	8	8	17.1	17.1	17.1	0	13.691	8	8	8	6	2	3	6	2	3	6	2	3	1.2995	1.0764	25.724	5	0	1.2995	32.81	5	4	1.1202	26.649	2	0	1.3197	34.833	2	0	10.8	3.1	8.2
Q2G260	Q2G260	Uncharacterized protein SAOUHSC_00094	>sp|Q2G260|Y094_STAA8 Uncharacterized protein SAOUHSC_00094 OS=Staphylococcus aureus (strain NCTC 8325) GN=SAOUHSC_00094 PE=1 SV=1	0.488184	0.0655825	-1.69325	2.66962	NaN		5	5	5	54.3	54.3	54.3	0	30.238	5	5	5	2	4	2	2	4	2	2	4	2	4.2874	4.4224	161.13	5	5	0.42857	6.2195	2	2	6.2493	23.253	3	3	NaN	NaN	0	0	21.1	42.2	26.6
Q2G261	Q2G261	Superoxide dismutase [Mn/Fe] 2	>sp|Q2G261|SODM2_STAA8 Superoxide dismutase [Mn/Fe] 2 OS=Staphylococcus aureus (strain NCTC 8325) GN=sodM PE=1 SV=1	-0.171731	0.427708	0.0490731	-0.460747	-0.103519		10	10	10	58.3	58.3	58.3	0	87.694	10	10	10	8	8	8	8	8	8	8	8	8	0.90939	0.90779	31.756	17	0	1.4765	29.803	6	0	0.76481	11.165	5	0	0.87399	37.175	6	0	42.7	46.7	58.3
Q2G270	Q2G270	Putative uncharacterized protein	>tr|Q2G270|Q2G270_STAA8 Putative uncharacterized protein OS=Staphylococcus aureus (strain NCTC 8325) GN=SAOUHSC_02568 PE=4 SV=1	0.0828296	0.115666	0.558855	-0.244634	-0.0657326		4	4	4	55.6	55.6	55.6	0	59.484	4	4	4	4	4	4	4	4	4	4	4	4	1.0779	1.0512	33.637	12	0	2.1817	36.267	4	0	0.90473	22.876	4	0	0.90081	22.665	4	0	55.6	55.6	55.6
Q2G274	Q2G274	DNA gyrase subunit B	>tr|Q2G274|Q2G274_STAA8 DNA gyrase subunit B OS=Staphylococcus aureus (strain NCTC 8325) GN=gyrB PE=3 SV=1	-0.172908	1.47426	-0.237133	-0.132167	-0.149425		23	23	23	37.7	37.7	37.7	0	116.69	23	23	23	14	17	15	14	17	15	14	17	15	0.96067	0.89615	25.018	41	0	1.2531	18.469	10	0	0.93235	23.475	15	0	0.85974	30.389	16	0	23.9	30.3	24.7
Q2G277	Q2G277	Putative uncharacterized protein	>tr|Q2G277|Q2G277_STAA8 Putative uncharacterized protein OS=Staphylococcus aureus (strain NCTC 8325) GN=SAOUHSC_00774 PE=4 SV=1	-0.427055	0.185877	1.04446	-0.563732	-1.7619		6	6	6	23.1	23.1	23.1	0	14.02	6	6	6	4	5	4	4	5	4	4	5	4	2.7278	2.0626	55.016	5	0	2.7278	7.6665	3	0	0.68297	51.424	6	5	0.2874	152.75	4	3	15.7	23.1	16.2
Q2G280	Q2G280	Putative uncharacterized protein	>tr|Q2G280|Q2G280_STAA8 Putative uncharacterized protein OS=Staphylococcus aureus (strain NCTC 8325) GN=SAOUHSC_01999 PE=4 SV=1	-0.0105302	0.0203132	0.0392789	-0.314051	0.243182		10	10	10	57.6	57.6	57.6	0	28.293	10	10	10	8	8	9	8	8	9	8	8	9	1.1369	0.9706	27.744	15	0	1.453	19.474	4	0	0.82725	29.785	6	0	1.1593	23.49	5	0	52.3	57	52.3
Q2G283	Q2G283	Glutamate-1-semialdehyde 2,1-aminomutase 2	>sp|Q2G283|GSA2_STAA8 Glutamate-1-semialdehyde 2,1-aminomutase 2 OS=Staphylococcus aureus (strain NCTC 8325) GN=hemL2 PE=3 SV=2	0.276037	0.386656	0.738465	-0.188102	0.277747		14	14	14	41.7	41.7	41.7	0	108.97	14	14	14	10	12	10	10	12	10	10	12	10	1.1735	1.1199	39.185	24	0	2.4134	29.681	7	0	0.87492	27.596	9	0	1.1735	29.384	8	0	28.4	36.6	31.9
Q2G292	Q2G292	Putative uncharacterized protein	>tr|Q2G292|Q2G292_STAA8 Putative uncharacterized protein OS=Staphylococcus aureus (strain NCTC 8325) GN=SAOUHSC_01849 PE=4 SV=1	0.0523798	0.298699	0.180275	-0.0276014	0.00446549		4	4	4	13.4	13.4	13.4	0	4.3417	4	4	4	2	4	3	2	4	3	2	4	3	1.0098	0.99741	21.433	8	0	1.5387	70.425	3	2	1.0098	21.032	4	0	0.97262	26.825	3	0	6.2	13.4	11.3
Q2G293	Q2G293	Putative uncharacterized protein	>tr|Q2G293|Q2G293_STAA8 Putative uncharacterized protein OS=Staphylococcus aureus (strain NCTC 8325) GN=SAOUHSC_01847 PE=4 SV=1	0.376242	0.355448	1.07717	0.340391	-0.28884		4	4	4	26.7	26.7	26.7	0	32.72	4	4	4	3	3	4	3	3	4	3	3	4	1.2341	1.2661	45.281	8	6	2.9353	37.76	2	2	1.2341	18.469	2	1	0.76913	35.502	4	3	18.1	18.1	26.7
Q2G294	Q2G294	Acetyl-CoA synthetase, putative	>tr|Q2G294|Q2G294_STAA8 Acetyl-CoA synthetase, putative OS=Staphylococcus aureus (strain NCTC 8325) GN=SAOUHSC_01846 PE=4 SV=1	-0.134682	1.00814	-0.151634	-0.203851	-0.0485614		37	37	37	55.1	55.1	55.1	0	323.31	37	37	37	30	27	31	30	27	31	30	27	31	1.0944	0.90023	32.43	71	0	1.329	22.409	25	0	0.92194	32.097	21	0	0.88999	40.664	25	0	49.1	50.4	55.1
Q2G295	Q2G295	Catabolite control protein A	>tr|Q2G295|Q2G295_STAA8 Catabolite control protein A OS=Staphylococcus aureus (strain NCTC 8325) GN=SAOUHSC_01850 PE=4 SV=1	0.139695	1.14385	0.203389	0.148609	0.067088		19	19	19	55.6	55.6	55.6	0	170.3	19	19	19	17	15	17	17	15	17	17	15	17	1.1408	1.1084	19.632	41	0	1.6723	21.901	14	0	1.1104	11.849	13	0	0.99483	22.915	14	0	52.3	49.2	47.7
Q2G296	Q2G296	Formate--tetrahydrofolate ligase	>sp|Q2G296|FTHS_STAA8 Formate--tetrahydrofolate ligase OS=Staphylococcus aureus (strain NCTC 8325) GN=fhs PE=3 SV=1	-0.0857402	0.591675	0.00776951	-0.0841349	-0.180855		33	33	33	64.9	64.9	64.9	0	323.31	33	33	33	30	30	31	30	30	31	30	30	31	1.0462	0.94835	42.566	109	0	1.5165	26.113	35	0	0.99419	33.014	37	0	0.8362	59.708	37	0	63.8	57.7	57.7
Q2G2A1	Q2G2A1	Putative uncharacterized protein	>tr|Q2G2A1|Q2G2A1_STAA8 Putative uncharacterized protein OS=Staphylococcus aureus (strain NCTC 8325) GN=SAOUHSC_01692 PE=4 SV=1	0.132469	0.903038	0.192573	0.0292761	0.175557		6	6	6	45.5	45.5	45.5	0	19.718	6	6	6	5	4	6	5	4	6	5	4	6	1.1994	1.1347	22.208	10	0	1.5706	13.174	4	0	1.0099	18.521	3	0	1.049	38.561	3	0	40.6	30.8	45.5
Q2G2A3	Q2G2A3	Dihydrolipoyl dehydrogenase	>tr|Q2G2A3|Q2G2A3_STAA8 Dihydrolipoyl dehydrogenase OS=Staphylococcus aureus (strain NCTC 8325) GN=SAOUHSC_01043 PE=4 SV=1	-0.0973082	1.41435	-0.120577	-0.0582026	-0.113146		31	31	31	62.8	62.8	62.8	0	323.31	31	31	31	27	29	30	27	29	30	27	29	30	1.0283	0.92457	40.732	104	0	1.3927	23.663	31	0	1.0022	36.931	37	0	0.89441	54.649	36	0	60	61.1	62.8
Q2G2A4	Q2G2A4	Dihydrolipoamide S-acetyltransferase component of pyruvate dehydrogenase complex E2, putative	>tr|Q2G2A4|Q2G2A4_STAA8 Dihydrolipoamide S-acetyltransferase component of pyruvate dehydrogenase complex E2, putative OS=Staphylococcus aureus (strain NCTC 8325) GN=SAOUHSC_01042 PE=3 SV=1	-0.0688787	0.384037	0.0611541	-0.104635	-0.163155		29	29	29	65.1	65.1	65.1	0	323.31	29	29	29	26	24	25	26	24	25	26	24	25	1.1106	0.94379	34.013	82	0	1.545	29.931	30	0	0.98395	30.543	26	0	0.86372	37.464	26	0	64.9	56.7	64.4
Q2G2A5	Q2G2A5	Pyruvate dehydrogenase complex, E1 component, pyruvate dehydrogenase beta subunit, putative	>tr|Q2G2A5|Q2G2A5_STAA8 Pyruvate dehydrogenase complex, E1 component, pyruvate dehydrogenase beta subunit, putative OS=Staphylococcus aureus (strain NCTC 8325) GN=SAOUHSC_01041 PE=4 SV=1	-0.668949	0.363662	0.660198	-1.63451	-1.03254		25	25	25	78.5	78.5	78.5	0	323.31	25	25	25	20	21	23	20	21	23	20	21	23	0.58502	0.59954	77.803	62	0	2.3753	27.904	22	0	0.34577	32.374	19	0	0.46663	55.078	21	0	72.6	77.2	78.2
Q2G2B2	Q2G2B2	Surface protein G	>sp|Q2G2B2|SASG_STAA8 Surface protein G OS=Staphylococcus aureus (strain NCTC 8325) GN=sasG PE=1 SV=1	0.475917	0.361609	-0.485943	0.782828	1.13086		18	18	18	34.7	34.7	34.7	0	66.391	18	18	18	16	6	5	16	6	5	16	6	5	1.1432	0.84496	45.584	13	0	1.0208	16.813	9	0	1.679	32.983	4	2	2.0645	32.614	4	2	32.7	10.6	12.8
Q2G2C1	Q2G2C1	Pyruvate carboxylase	>tr|Q2G2C1|Q2G2C1_STAA8 Pyruvate carboxylase OS=Staphylococcus aureus (strain NCTC 8325) GN=SAOUHSC_01064 PE=4 SV=1	0.114863	0.692695	-0.00190562	0.139601	0.206893		117	117	117	84.4	84.4	84.4	0	323.31	117	117	117	104	109	112	104	109	112	104	109	112	1.2304	1.0759	37.327	820	0	1.4689	26.026	264	0	1.189	40.103	286	0	1.1169	41.469	270	0	83	82.7	83.2
Q2G2C3	Q2G2C3	UPF0358 protein SAOUHSC_01062	>sp|Q2G2C3|Y1062_STAA8 UPF0358 protein SAOUHSC_01062 OS=Staphylococcus aureus (strain NCTC 8325) GN=SAOUHSC_01062 PE=3 SV=1	0.398778	0.788446	0.121015	0.328147	0.747173		3	3	3	27.5	27.5	27.5	0	6.8221	3	3	3	3	3	3	3	3	3	3	3	3	1.4668	1.2554	20.63	6	0	1.5169	12.414	2	0	1.2568	4.2673	2	0	1.5735	66.403	4	2	27.5	27.5	27.5
Q2G2C4	Q2G2C4	2-C-methyl-D-erythritol 4-phosphate cytidylyltransferase	>tr|Q2G2C4|Q2G2C4_STAA8 2-C-methyl-D-erythritol 4-phosphate cytidylyltransferase OS=Staphylococcus aureus (strain NCTC 8325) GN=SAOUHSC_00220 PE=4 SV=1	0.175519	0.518582	0.252052	0.348232	-0.0737273		11	8	8	64.7	57.6	57.6	0	43.942	11	8	8	8	9	10	5	6	7	5	6	7	0.99531	1.0255	34.321	15	0	1.7412	11.41	3	0	1.2601	34.545	5	0	0.88589	35.177	7	0	46.4	52.2	58.9
Q2G2D0	Q2G2D0	Translation initiation factor IF-2	>sp|Q2G2D0|IF2_STAA8 Translation initiation factor IF-2 OS=Staphylococcus aureus (strain NCTC 8325) GN=infB PE=3 SV=1	-0.101305	0.901337	-0.0556962	-0.0677574	-0.180463		38	38	38	47.5	47.5	47.5	0	323.31	38	38	38	25	36	35	25	36	35	25	36	35	1.0167	0.93044	36.753	85	0	1.4468	21.371	24	0	0.99246	28.535	30	0	0.85782	51.404	31	0	37	42.7	45.5
Q2G2D2	Q2G2D2	Transcription termination/antitermination protein NusA	>tr|Q2G2D2|Q2G2D2_STAA8 Transcription termination/antitermination protein NusA OS=Staphylococcus aureus (strain NCTC 8325) GN=nusA PE=3 SV=1	0.049367	0.361649	-0.0502484	0.0805212	0.117828		19	19	19	48.1	48.1	48.1	0	150.52	19	19	19	15	13	11	15	13	11	15	13	11	1.1355	1.022	47.695	26	0	1.4004	70.462	10	0	1.1006	23.098	8	0	1.0143	28.742	8	0	41.7	38.9	31.7
Q2G2D7	Q2G2D7	Putative uncharacterized protein	>tr|Q2G2D7|Q2G2D7_STAA8 Putative uncharacterized protein OS=Staphylococcus aureus (strain NCTC 8325) GN=SAOUHSC_02447 PE=4 SV=1	0.024428	0.135106	-0.0889757	0.125651	0.0366088		14	14	14	48.3	48.3	48.3	0	220.47	14	14	14	11	14	14	11	14	14	11	14	14	1.1383	1.0315	18.629	31	0	1.3815	28.187	9	0	1.1483	13.584	10	0	0.96439	12.599	12	0	42	48.3	48.3
Q2G2D8	Q2G2D8	ABC transporter, substrate-binding protein, putative	>tr|Q2G2D8|Q2G2D8_STAA8 ABC transporter, substrate-binding protein, putative OS=Staphylococcus aureus (strain NCTC 8325) GN=SAOUHSC_00634 PE=3 SV=1	0.0196253	0.0265962	0.448478	-0.353579	-0.0360229		23	23	23	68.6	68.6	68.6	0	308.38	23	23	23	22	20	21	22	20	21	22	20	21	0.93545	0.9578	69.477	48	0	2.0406	116.33	16	0	0.80869	18.594	16	0	0.92341	27.467	16	0	67.6	64.4	65.4
Q2G2E0	Q2G2E0	Putative uncharacterized protein	>tr|Q2G2E0|Q2G2E0_STAA8 Putative uncharacterized protein OS=Staphylococcus aureus (strain NCTC 8325) GN=SAOUHSC_00633 PE=4 SV=1	0.25084	1.08448	0.404249	0.167615	0.180657		6	6	6	9.1	9.1	9.1	0	13.237	6	6	6	4	3	4	4	3	4	4	3	4	1.166	1.1232	22.716	7	0	1.7612	16.627	3	1	1.1266	18.543	3	0	1.0706	64.875	4	2	7.3	3.7	6.4
Q2G2E5	Q2G2E5	Putative uncharacterized protein	>tr|Q2G2E5|Q2G2E5_STAA8 Putative uncharacterized protein OS=Staphylococcus aureus (strain NCTC 8325) GN=SAOUHSC_00647 PE=3 SV=1	-0.332699	0.823644	-0.150401	-0.621067	-0.226628		14	14	14	30.3	30.3	30.3	0	192.21	14	14	14	13	11	11	13	11	11	13	11	11	0.82856	0.8154	20.988	29	0	1.3343	19.404	11	0	0.68264	11.819	10	0	0.82852	12.709	8	0	28.2	21.9	21.9
Q2G2E9	Q2G2E9	Putative uncharacterized protein	>tr|Q2G2E9|Q2G2E9_STAA8 Putative uncharacterized protein OS=Staphylococcus aureus (strain NCTC 8325) GN=SAOUHSC_00030 PE=4 SV=1	0.222959	0.760799	0.36614	0.289952	0.0127833		19	19	19	32.5	32.5	32.5	0	46.386	19	19	19	13	11	13	13	11	13	13	11	13	1.205	1.1977	127.03	10	0	1.8901	26.961	3	0	1.1974	186.16	3	0	0.9471	141.54	4	0	29.8	24.1	28.9
Q2G2F0	Q2G2F0	Putative uncharacterized protein	>tr|Q2G2F0|Q2G2F0_STAA8 Putative uncharacterized protein OS=Staphylococcus aureus (strain NCTC 8325) GN=SAOUHSC_01968 PE=4 SV=1	0.0572544	0.0547071	0.692516	-0.468771	-0.0519824		9	9	9	59.3	59.3	59.3	0	47.888	9	9	9	9	8	8	9	8	8	9	8	8	0.99516	0.97263	42.93	21	0	2.3593	21.406	7	0	0.76526	26.978	6	0	0.90824	40.201	8	0	59.3	59.3	59.3
Q2G2F2	Q2G2F2	Putative uncharacterized protein	>tr|Q2G2F2|Q2G2F2_STAA8 Putative uncharacterized protein OS=Staphylococcus aureus (strain NCTC 8325) GN=SAOUHSC_01966 PE=4 SV=1	-0.00389779	0.0038089	0.166587	0.437228	-0.615508		5	5	5	10.8	10.8	10.8	0	11.531	5	5	5	5	3	4	5	3	4	5	3	4	1.176	1.1224	24.341	5	0	1.6528	110.37	5	3	1.3643	85.551	4	3	0.6082	35.377	4	2	10.8	7.1	9.1
Q2G2F3	Q2G2F3	Signal transduction protein TRAP	>sp|Q2G2F3|TRAP_STAA8 Signal transduction protein TRAP OS=Staphylococcus aureus (strain NCTC 8325) GN=traP PE=1 SV=1	0.134146	0.355417	0.381948	-0.105427	0.125916		16	16	16	90.4	90.4	90.4	0	202.68	16	16	16	14	14	15	14	14	15	14	14	15	1.0958	1.0981	37.564	50	0	1.8754	39.386	15	0	0.95011	27.252	18	0	1.0364	34.487	17	0	90.4	90.4	90.4
Q2G2F8	Q2G2F8	ATP synthase subunit b	>sp|Q2G2F8|ATPF_STAA8 ATP synthase subunit b OS=Staphylococcus aureus (strain NCTC 8325) GN=atpF PE=3 SV=1	0.122222	0.0646834	1.23076	0.0434844	-0.907576		5	5	5	31.8	31.8	31.8	0	15.452	5	5	5	5	2	3	5	2	3	5	2	3	0.61169	0.65458	92.901	5	0	3.1843	50.55	6	4	1.0504	80.914	2	1	0.51775	40.755	4	2	31.8	13.9	22.5
Q2G2G0	Q2G2G0	Putative uncharacterized protein	>tr|Q2G2G0|Q2G2G0_STAA8 Putative uncharacterized protein OS=Staphylococcus aureus (strain NCTC 8325) GN=SAOUHSC_00717 PE=4 SV=1	0.378954	1.35097	0.289952	0.302524	0.544387		14	14	14	56.8	56.8	56.8	0	100.36	14	14	14	14	12	14	14	12	14	14	12	14	1.347	1.2776	19.809	26	0	1.8951	22.975	10	0	1.3186	8.3744	8	0	1.3666	16.399	8	0	56.8	52.1	56.8
Q2G2G1	Q2G2G1	Putative uncharacterized protein	>tr|Q2G2G1|Q2G2G1_STAA8 Putative uncharacterized protein OS=Staphylococcus aureus (strain NCTC 8325) GN=SAOUHSC_00716 PE=4 SV=1	-1.06305	0.623488	-1.02227	-2.18922	0.0223323		4	4	4	20.4	20.4	20.4	0	4.0143	4	4	4	3	2	3	3	2	3	3	2	3	0.74734	0.49234	65.632	7	0	0.74734	2.4904	3	0	0.22649	38.597	2	0	0.95863	28.306	2	0	12.7	10.8	18.5
Q2G2G2	Q2G2G2	Response regulator SaeR	>sp|Q2G2G2|SAER_STAA8 Response regulator SaeR OS=Staphylococcus aureus (strain NCTC 8325) GN=saeR PE=1 SV=1	0.280778	0.769511	0.497127	0.037312	0.307895		4	4	4	25	25	25	0	34.193	4	4	4	4	4	4	4	4	4	4	4	4	1.2667	1.1423	20.903	10	0	1.9959	26.099	4	0	1.1242	6.0537	3	0	1.2184	13.309	3	0	25	25	25
Q2G2G4	Q2G2G4	Inositol monophosphatase family protein, putative	>tr|Q2G2G4|Q2G2G4_STAA8 Inositol monophosphatase family protein, putative OS=Staphylococcus aureus (strain NCTC 8325) GN=SAOUHSC_01055 PE=4 SV=1	0.0913904	0.218383	0.335483	-0.182328	0.121015		5	5	5	28.7	28.7	28.7	0	45.622	5	5	5	3	3	5	3	3	5	3	3	5	1.0446	1.0287	26.375	8	0	1.8488	56.684	3	1	0.87283	40.932	3	0	1.0409	6.9822	3	0	15.3	13.8	28.7
Q2G2G6	Q2G2G6	Putative uncharacterized protein	>tr|Q2G2G6|Q2G2G6_STAA8 Putative uncharacterized protein OS=Staphylococcus aureus (strain NCTC 8325) GN=SAOUHSC_01050 PE=4 SV=1	-0.0938967	0.135032	0.116498	NaN	-0.304291		7	7	7	23.6	23.6	23.6	0	7.0201	7	7	7	7	3	3	7	3	3	7	3	3	0.88596	0.88159	47.442	7	0	1.5429	47.641	4	0	NaN	NaN	1	0	0.77962	43.712	3	1	23.6	17.1	8.6
Q2G2G7	Q2G2G7	UPF0637 protein SAOUHSC_01054	>sp|Q2G2G7|Y1054_STAA8 UPF0637 protein SAOUHSC_01054 OS=Staphylococcus aureus (strain NCTC 8325) GN=SAOUHSC_01054 PE=3 SV=1	-0.213617	0.425719	0.118758	-0.224739	-0.534872		6	6	6	37.3	37.3	37.3	0	81.025	6	6	6	6	4	6	6	4	6	6	4	6	0.99617	0.97271	36.556	14	0	1.6347	25.853	5	0	0.87612	23.03	4	0	0.6454	35.837	5	0	37.3	26	37.3
Q2G2H4	Q2G2H4	DNA polymerase III subunit beta	>tr|Q2G2H4|Q2G2H4_STAA8 DNA polymerase III subunit beta OS=Staphylococcus aureus (strain NCTC 8325) GN=SAOUHSC_00002 PE=4 SV=1	-0.133524	1.07941	-0.0889605	-0.215731	-0.095882		23	23	23	57.8	57.8	57.8	0	323.31	23	23	23	19	20	21	19	20	21	19	20	21	0.95072	0.90219	31.889	50	0	1.3849	19.803	16	0	0.91247	28.487	17	0	0.9106	40.306	17	0	55.2	53.6	54.9
Q2G2H5	Q2G2H5	Chromosomal replication initiator protein DnaA	>sp|Q2G2H5|DNAA_STAA8 Chromosomal replication initiator protein DnaA OS=Staphylococcus aureus (strain NCTC 8325) GN=dnaA PE=3 SV=1	0.254004	0.659664	0.445621	-0.0270721	0.343465		4	4	4	13.2	13.2	13.2	0	3.8396	4	4	4	3	2	1	3	2	1	3	2	1	1.2282	1.2688	19.489	6	0	2.1381	9.8678	3	1	0.98189	3.465	2	0	1.2282	4.6333	2	0	9.1	7.1	2.9
Q2G2K9	Q2G2K9	Putative uncharacterized protein	>tr|Q2G2K9|Q2G2K9_STAA8 Putative uncharacterized protein OS=Staphylococcus aureus (strain NCTC 8325) GN=SAOUHSC_00639 PE=4 SV=1	-0.178301	0.512223	-0.275507	0.0816123	-0.341007		3	3	3	10	10	10	0	20.418	3	3	3	2	3	3	2	3	3	2	3	3	1.0867	0.82616	101.04	9	7	1.0995	122.56	3	2	1.0867	116.81	3	2	0.73341	107.37	3	3	9.2	10	10
Q2G2L0	Q2G2L0	Putative uncharacterized protein	>tr|Q2G2L0|Q2G2L0_STAA8 Putative uncharacterized protein OS=Staphylococcus aureus (strain NCTC 8325) GN=SAOUHSC_00638 PE=4 SV=1	-0.0193998	0.172166	0.0214797	-0.0985982	0.018919		7	7	7	40.7	40.7	40.7	0	31.831	7	7	7	4	4	6	4	4	6	4	4	6	1.0489	1.0132	10.58	7	0	1.4288	59.692	4	2	0.91997	13.443	3	0	0.91121	82.743	7	5	19.2	24.3	40.7
Q2G2L2	Q2G2L2	Putative uncharacterized protein	>tr|Q2G2L2|Q2G2L2_STAA8 Putative uncharacterized protein OS=Staphylococcus aureus (strain NCTC 8325) GN=SAOUHSC_00637 PE=3 SV=1	-0.184376	0.497286	-0.0352982	-0.053883	-0.463947		8	8	8	32.4	32.4	32.4	0	61.824	8	8	8	8	6	6	8	6	6	8	6	6	1.0362	0.91328	29.219	12	0	1.4247	18.191	5	0	1.0122	14.428	3	0	0.69247	43.483	4	0	32.4	23.9	24.3
Q2G2M0	Q2G2M0	Tautomerase	>tr|Q2G2M0|Q2G2M0_STAA8 Tautomerase OS=Staphylococcus aureus (strain NCTC 8325) GN=SAOUHSC_01362 PE=3 SV=1	0.746776	0.34437	1.79834	-0.839622	1.28161		3	3	3	72.1	72.1	72.1	0	8.1004	3	3	3	3	3	3	3	3	3	3	3	3	1.2994	1.3247	69.027	6	0	5.2727	40.575	3	2	0.59593	52.272	3	0	2.3309	81.038	4	2	72.1	72.1	72.1
Q2G2M2	Q2G2M2	Phosphatidylglycerol lysyltransferase	>sp|Q2G2M2|MPRF_STAA8 Phosphatidylglycerol lysyltransferase OS=Staphylococcus aureus (strain NCTC 8325) GN=mprF PE=1 SV=1	-0.0388126	0.150531	-0.211264	0.00532815	0.0894982		8	8	8	7.5	7.5	7.5	0	41.271	8	8	8	7	6	3	7	6	3	7	6	3	1.1474	0.95528	13.286	13	0	1.3121	13.087	7	0	1.0445	10.988	4	0	0.99357	44.23	3	1	6.5	6.1	3
Q2G2M3	Q2G2M3	Putative uncharacterized protein	>tr|Q2G2M3|Q2G2M3_STAA8 Putative uncharacterized protein OS=Staphylococcus aureus (strain NCTC 8325) GN=SAOUHSC_00513 PE=4 SV=1	0.134016	0.187355	-0.217642	0.625645	-0.00595617		7	7	7	27.8	27.8	27.8	0	22.045	7	7	7	4	6	5	4	6	5	4	6	5	1.0216	0.98199	13.768	6	0	1.1436	37.805	5	3	1.5591	67.287	6	4	0.92488	78.085	5	3	17.3	24.6	22.2
Q2G2M6	Q2G2M6	Cysteine--tRNA ligase	>sp|Q2G2M6|SYC_STAA8 Cysteine--tRNA ligase OS=Staphylococcus aureus (strain NCTC 8325) GN=cysS PE=3 SV=1	-0.0619605	0.466314	-0.153238	-0.0521319	0.0194884		21	21	21	49.1	49.1	49.1	0	257.56	21	21	21	19	20	18	19	20	18	19	20	18	1.101	0.94555	20.88	42	0	1.3173	18.791	14	0	1.0247	20.782	14	0	0.98467	23.966	14	0	44.2	48.7	41.8
Q2G2M7	Q2G2M7	Serine acetyltransferase	>tr|Q2G2M7|Q2G2M7_STAA8 Serine acetyltransferase OS=Staphylococcus aureus (strain NCTC 8325) GN=SAOUHSC_00510 PE=3 SV=1	-0.109548	0.433164	-0.289598	-0.07312	0.0340749		4	4	4	23.3	23.3	23.3	0	23.304	4	4	4	3	4	4	3	4	4	3	4	4	1.0521	1.019	15.336	8	0	1.1802	69.934	3	1	0.93194	10.771	3	0	0.99144	14.664	3	0	17.7	23.3	23.3
Q2G2N4	Q2G2N4	Protein GlcT	>sp|Q2G2N4|GLCT_STAA8 Protein GlcT OS=Staphylococcus aureus (strain NCTC 8325) GN=glcT PE=3 SV=1	0.237776	0.418915	-0.111446	0.199876	0.624896		1	1	1	4.9	4.9	4.9	0	8.5216	1	1	1	1	1	1	1	1	1	1	1	1	1.1788	1.1486	28.476	4	0	1.2887	17.677	2	1	1.1582	2.912	2	0	1.4664	8.6046	2	1	4.9	4.9	4.9
Q2G2P2	Q2G2P2	Globin domain protein	>tr|Q2G2P2|Q2G2P2_STAA8 Globin domain protein OS=Staphylococcus aureus (strain NCTC 8325) GN=SAOUHSC_00204 PE=3 SV=1	-0.0977623	0.535585	-0.117224	0.0299829	-0.206046		17	17	17	42.8	42.8	42.8	0	202.62	17	17	17	15	13	15	15	13	15	15	13	15	1.0309	0.94071	19.863	38	0	1.2616	17.953	12	0	1.0473	12.44	12	0	0.82327	24.874	14	0	42	38.3	42.3
Q2G2P7	Q2G2P7	Histidine ammonia-lyase	>sp|Q2G2P7|HUTH_STAA8 Histidine ammonia-lyase OS=Staphylococcus aureus (strain NCTC 8325) GN=hutH PE=3 SV=1	-0.0275891	0.123648	-0.0662612	0.119555	-0.136062		17	17	17	35.9	35.9	35.9	0	186.47	17	17	17	10	15	14	10	15	14	10	15	14	1.0623	0.96656	29.03	29	0	1.2965	11.66	7	0	1.0475	29.483	11	0	0.85923	37.143	11	0	26	33.5	32.5
Q2G2Q0	Q2G2Q0	DNA gyrase subunit A	>sp|Q2G2Q0|GYRA_STAA8 DNA gyrase subunit A OS=Staphylococcus aureus (strain NCTC 8325) GN=gyrA PE=1 SV=1	-0.017125	0.0496119	0.0825664	-0.239754	0.105812		22	22	22	27.8	27.8	27.8	0	164.91	22	22	22	18	17	17	18	17	17	18	17	17	1.2272	1.0412	27.143	38	0	1.5788	17.939	14	0	0.87455	22.694	13	0	0.99922	39.356	11	0	25.9	19.1	24.4
Q2G2Q1	Q2G2Q1	30S ribosomal protein S15	>sp|Q2G2Q1|RS15_STAA8 30S ribosomal protein S15 OS=Staphylococcus aureus (strain NCTC 8325) GN=rpsO PE=3 SV=1	1.0649	0.900891	0.232047	1.4204	1.54226		4	4	4	56.2	56.2	56.2	0	37.683	4	4	4	4	3	3	4	3	3	4	3	3	2.0513	2.1126	61.523	12	0	1.602	19.001	3	0	2.7353	82.596	4	0	2.8458	47.272	5	0	56.2	56.2	56.2
Q2G2Q2	Q2G2Q2	Riboflavin biosynthesis protein	>tr|Q2G2Q2|Q2G2Q2_STAA8 Riboflavin biosynthesis protein OS=Staphylococcus aureus (strain NCTC 8325) GN=SAOUHSC_01249 PE=3 SV=1	0.124683	0.319181	NaN	0.241596	0.00776951		2	2	2	7.1	7.1	7.1	0	2.1315	2	2	2	1	2	2	1	2	2	1	2	2	1.1838	1.1927	48.245	4	0	NaN	NaN	1	0	1.1737	5.2244	2	1	0.96705	30.618	2	0	3.7	7.1	7.1
Q2G2Q4	Q2G2Q4	Ribosome-binding factor A	>sp|Q2G2Q4|RBFA_STAA8 Ribosome-binding factor A OS=Staphylococcus aureus (strain NCTC 8325) GN=rbfA PE=3 SV=1	0.191093	0.248957	0.661294	-0.303134	0.215119		4	4	4	49.1	49.1	49.1	0	14.197	4	4	4	2	2	4	2	2	4	2	2	4	1.0585	1.0955	11.927	4	0	2.3435	37.859	2	1	0.81707	19.435	2	1	1.1024	23.875	5	3	32.8	32.8	49.1
Q2G2R8	Q2G2R8	Staphopain A	>sp|Q2G2R8|SSPP_STAA8 Staphopain A OS=Staphylococcus aureus (strain NCTC 8325) GN=sspP PE=1 SV=1	0.907092	1.04647	0.778209	1.03598	NaN		2	2	2	5.7	5.7	5.7	0	3.3954	2	2	2	2	2	2	2	2	2	2	2	2	2.0018	2.0431	50.945	6	5	2.3318	24.253	2	1	2.0256	77.95	3	3	NaN	NaN	1	1	5.7	5.7	5.7
Q2G2R9	Q2G2R9	UPF0316 protein SAOUHSC_02131	>sp|Q2G2R9|Y2131_STAA8 UPF0316 protein SAOUHSC_02131 OS=Staphylococcus aureus (strain NCTC 8325) GN=SAOUHSC_02131 PE=3 SV=1	-0.166078	0.100316	-0.0825911	-1.1701	0.75446		5	5	5	22.5	22.5	22.5	0	13.592	5	5	5	4	3	4	4	3	4	4	3	4	1.2709	0.94436	13.213	5	0	1.3831	7.582	3	0	0.43905	47.523	3	2	1.5996	62.342	2	1	22.5	19	18
Q2G2S0	Q2G2S0	Adenylosuccinate lyase	>sp|Q2G2S0|PUR8_STAA8 Adenylosuccinate lyase OS=Staphylococcus aureus (strain NCTC 8325) GN=purB PE=3 SV=1	0.00318533	0.0183036	0.0311129	0.0805212	-0.102078		22	22	22	50.1	50.1	50.1	0	150.55	22	22	22	21	21	19	21	21	19	21	21	19	1.0873	1.0218	39.016	65	0	1.4826	43.07	23	0	1.0777	20.087	21	0	0.8988	49.031	21	0	49.2	50.1	39.4
Q2G2S6	Q2G2S6	Foldase protein PrsA	>sp|Q2G2S6|PRSA_STAA8 Foldase protein PrsA OS=Staphylococcus aureus (strain NCTC 8325) GN=prsA PE=3 SV=1	-0.170218	0.121008	0.253505	NaN	-0.593942		4	4	4	12.5	12.5	12.5	0	4.5441	4	4	4	4	2	4	4	2	4	4	2	4	1.6262	1.1879	77.001	9	8	1.6881	54.123	4	3	NaN	NaN	1	1	0.62999	98.448	4	4	12.5	6.2	12.5
Q2G2S7	Q2G2S7	Putative uncharacterized protein	>tr|Q2G2S7|Q2G2S7_STAA8 Putative uncharacterized protein OS=Staphylococcus aureus (strain NCTC 8325) GN=SAOUHSC_01975 PE=4 SV=1	0.289378	0.774945	0.561693	0.13947	0.166972		8	8	8	27.6	27.6	27.6	0	36.727	8	8	8	6	4	3	6	4	3	6	4	3	1.3296	1.1015	42.108	5	0	2.0974	39.173	3	0	1.0961	100.86	3	2	1.044	77.505	2	1	22.9	17.8	12.1
Q2G2S8	Q2G2S8	Putative uncharacterized protein	>tr|Q2G2S8|Q2G2S8_STAA8 Putative uncharacterized protein OS=Staphylococcus aureus (strain NCTC 8325) GN=SAOUHSC_01974 PE=4 SV=1	0.0925271	0.559829	0.177216	0.129217	-0.028852		27	27	27	34.3	34.3	34.3	0	230.73	27	27	27	21	23	21	21	23	21	21	23	21	1.269	1.0734	27.544	40	0	1.5592	20.709	16	0	1.1059	23.453	12	0	0.9476	33.619	12	0	27.2	28.2	27.3
Q2G2T1	Q2G2T1	Putative uncharacterized protein	>tr|Q2G2T1|Q2G2T1_STAA8 Putative uncharacterized protein OS=Staphylococcus aureus (strain NCTC 8325) GN=SAOUHSC_01973 PE=4 SV=1	-0.0443881	0.784271	-0.00442139	-0.0555013	-0.0732414		15	15	15	49.2	49.2	49.2	0	96.285	15	15	15	12	13	14	12	13	14	12	13	14	1.0384	0.97971	22.796	36	0	1.4612	20.467	11	0	0.98785	31.508	13	0	0.90243	12.396	12	0	41.9	44.1	45.4
Q2G2T3	Q2G2T3	50S ribosomal protein L9	>sp|Q2G2T3|RL9_STAA8 50S ribosomal protein L9 OS=Staphylococcus aureus (strain NCTC 8325) GN=rplI PE=3 SV=1	0.000603496	0.00116794	-0.272263	-0.00403071	0.278104		5	5	5	28	28	28	0	33.329	5	5	5	5	5	5	5	5	5	5	5	5	1.1365	1.1507	28.011	10	0	1.1637	47.147	3	0	1.0076	20.496	4	0	1.1464	6.9246	3	0	28	28	28
Q2G2T6	Q2G2T6	Putative uncharacterized protein	>tr|Q2G2T6|Q2G2T6_STAA8 Putative uncharacterized protein OS=Staphylococcus aureus (strain NCTC 8325) GN=SAOUHSC_00015 PE=4 SV=1	-0.400503	0.826823	-0.503221	-0.0598107	-0.638479		9	9	9	16.3	16.3	16.3	0	31.304	9	9	9	6	6	6	6	6	6	6	6	6	0.88269	0.73478	27.233	12	0	1.0361	15.216	4	0	0.94436	23.499	4	0	0.60366	23.97	4	0	11	9.5	11.3
Q2G2T8	Q2G2T8	Putative uncharacterized protein	>tr|Q2G2T8|Q2G2T8_STAA8 Putative uncharacterized protein OS=Staphylococcus aureus (strain NCTC 8325) GN=SAOUHSC_00712 PE=4 SV=1	-0.0617408	0.75462	-0.119824	-0.0195798	-0.0458186		12	12	12	42.3	42.3	42.3	0	54.161	12	12	12	10	11	11	10	11	11	10	11	11	1.1149	0.97585	38.094	28	0	1.3248	53.121	9	0	1.0302	25.182	9	0	0.92272	29.196	10	0	38	36.6	41.6
Q2G2U0	Q2G2U0	N-acetylglucosamine-6-phosphate deacetylase	>tr|Q2G2U0|Q2G2U0_STAA8 N-acetylglucosamine-6-phosphate deacetylase OS=Staphylococcus aureus (strain NCTC 8325) GN=SAOUHSC_00710 PE=3 SV=1	0.619976	0.49026	0.702923	1.40174	-0.244736		4	4	4	14	14	14	0	3.7135	4	4	4	3	2	3	3	2	3	3	2	3	0.78921	0.79872	62.713	3	0	2.4008	190.73	3	2	2.6528	169.19	2	1	0.78403	83.913	2	1	9.9	6.9	10.9
Q2G2U1	Q2G2U1	Histidine protein kinase SaeS	>sp|Q2G2U1|SAES_STAA8 Histidine protein kinase SaeS OS=Staphylococcus aureus (strain NCTC 8325) GN=saeS PE=1 SV=1	0.306189	1.09228	0.319849	0.139077	0.459641		9	9	9	35.9	35.9	35.9	0	111.7	9	9	9	9	8	8	9	8	8	9	8	8	1.282	1.3108	52.946	13	0	1.7878	52.929	4	0	1.0835	21.048	4	0	1.282	72.761	5	0	35.9	32.5	32.5
Q2G2U6	Q2G2U6	Transcriptional regulatory protein WalR	>sp|Q2G2U6|WALR_STAA8 Transcriptional regulatory protein WalR OS=Staphylococcus aureus (strain NCTC 8325) GN=walR PE=1 SV=1	-0.00155487	0.0114024	0.0723116	-0.0746082	-0.00236799		13	13	13	37.8	37.8	37.8	0	103.91	13	13	13	10	10	12	10	10	12	10	10	12	1.0331	0.98961	21.161	22	0	1.5338	22.51	5	0	0.99043	14.354	8	0	0.9343	26.959	9	0	36.9	37.8	37.8
Q2G2U9	Q2G2U9	Transcriptional regulator SarA	>sp|Q2G2U9|SARA_STAA8 Transcriptional regulator SarA OS=Staphylococcus aureus (strain NCTC 8325) GN=sarA PE=1 SV=3	0.0244964	0.255247	0.0720372	0.0450235	-0.0435716		11	11	11	58.9	58.9	58.9	0	68.628	11	11	11	9	11	11	9	11	11	9	11	11	1.1637	1.0317	38.599	17	0	1.5395	10.977	6	0	1.0953	15.453	5	0	0.92056	62.811	6	0	58.1	58.9	58.9
Q2G2W2	Q2G2W2	Putative uncharacterized protein	>tr|Q2G2W2|Q2G2W2_STAA8 Putative uncharacterized protein OS=Staphylococcus aureus (strain NCTC 8325) GN=SAOUHSC_02628 PE=4 SV=1	-0.0544946	0.0988402	-0.219085	0.110096	NaN		4	4	4	17.9	17.9	17.9	0	13.959	4	4	4	3	3	1	3	3	1	3	3	1	1.1163	0.93293	12.963	5	0	1.2463	17.738	3	1	1.1163	20.119	3	1	NaN	NaN	1	0	15.1	17.9	9.9
Q2G2W8	Q2G2W8	Initiation-control protein YabA	>tr|Q2G2W8|Q2G2W8_STAA8 Initiation-control protein YabA OS=Staphylococcus aureus (strain NCTC 8325) GN=SAOUHSC_00456 PE=4 SV=1	-0.307388	1.10383	-0.36125	-0.128519	-0.432396		2	2	2	18.1	18.1	18.1	0	19.67	2	2	2	2	2	2	2	2	2	2	2	2	0.76817	0.69718	36.908	5	0	1.0832	41.284	2	0	0.93493	56.501	2	0	0.69781	58.053	3	2	18.1	18.1	18.1
Q2G2X2	Q2G2X2	Glycerol-3-phosphate cytidylyltransferase	>tr|Q2G2X2|Q2G2X2_STAA8 Glycerol-3-phosphate cytidylyltransferase OS=Staphylococcus aureus (strain NCTC 8325) GN=SAOUHSC_00645 PE=4 SV=1	0.379092	0.462521	0.607105	NaN	0.151079		3	3	3	19.7	19.7	19.7	0	2.4645	3	3	3	3	1	2	3	1	2	3	1	2	1.4428	1.1174	85.104	5	0	1.9826	15.503	3	1	NaN	NaN	1	0	1.0431	129.1	3	1	19.7	6.1	12.9
Q93T05	Q93T05	DNA mismatch repair protein MutL	>sp|Q93T05|MUTL_STAA8 DNA mismatch repair protein MutL OS=Staphylococcus aureus (strain NCTC 8325) GN=mutL PE=3 SV=2	0.20032	0.442416	0.0727232	0.327917	NaN		4	4	4	9.6	9.6	9.6	0	4.359	4	4	4	2	4	1	2	4	1	2	4	1	1.2945	1.1009	8.5599	5	0	1.4968	8.0046	2	0	1.2945	36.771	3	1	NaN	NaN	1	0	3.4	9.6	2.2
Q9F0R1	Q9F0R1	HTH-type transcriptional regulator SarR	>sp|Q9F0R1|SARR_STAA8 HTH-type transcriptional regulator SarR OS=Staphylococcus aureus (strain NCTC 8325) GN=sarR PE=1 SV=3	0.218839	0.426197	0.584578	-0.0718457	0.143785		8	8	8	45.2	45.2	45.2	0	140.05	8	8	8	6	8	8	6	8	8	6	8	8	1.3764	1.2219	49.598	19	0	2.2125	18.989	5	0	0.97516	31.62	7	0	1.062	70.781	7	0	43.5	45.2	45.2
Q9KJN4	Q9KJN4	Response regulator ArlR	>sp|Q9KJN4|ARLR_STAA8 Response regulator ArlR OS=Staphylococcus aureus (strain NCTC 8325) GN=arlR PE=1 SV=1	0.285478	0.43389	NaN	0.471864	0.0990932		3	3	3	15.1	15.1	15.1	0	6.7012	3	3	3	1	2	3	1	2	3	1	2	3	1.0093	1.0711	16.795	4	0	NaN	NaN	1	1	1.3643	28.994	3	1	1.0093	7.1322	2	0	6.4	9.6	15.1
Q9RFJ6	Q9RFJ6	HTH-type transcriptional regulator rot	>sp|Q9RFJ6|ROT_STAA8 HTH-type transcriptional regulator rot OS=Staphylococcus aureus (strain NCTC 8325) GN=rot PE=3 SV=2	-0.931916	0.418195	0.61711	-2.25967	-1.15319		5	5	5	38	38	38	0	48.443	5	5	5	3	5	4	3	5	4	3	5	4	0.49479	0.50866	95.432	8	0	2.0882	10.44	3	1	0.22042	69.147	3	0	0.43389	100.22	3	0	26.5	38	26.5
Q9RQQ0	Q9RQQ0	Biofilm operon icaADBC HTH-type negative transcriptional regulator IcaR	>sp|Q9RQQ0|ICAR_STAA8 Biofilm operon icaADBC HTH-type negative transcriptional regulator IcaR OS=Staphylococcus aureus (strain NCTC 8325) GN=icaR PE=3 SV=1	0.32457	0.787452	0.570657	0.350497	0.052555		4	4	4	19.4	19.4	19.4	0	29.98	4	4	4	4	3	2	4	3	2	4	3	2	1.2855	1.275	40.074	7	0	2.1848	50.797	5	3	1.2855	24.468	3	0	1.018	32.449	2	0	19.4	18.8	12.9
Q9ZAH5	Q9ZAH5	Alanine racemase 1	>sp|Q9ZAH5|ALR1_STAA8 Alanine racemase 1 OS=Staphylococcus aureus (strain NCTC 8325) GN=alr1 PE=3 SV=1	-0.120913	0.620689	-0.153976	0.0187766	-0.22754		13	13	13	36.1	36.1	36.1	0	21.764	13	13	13	10	10	10	10	10	10	10	10	10	1.05	0.98474	28.009	21	0	1.2617	21.118	6	0	1.0672	33.266	8	0	0.81149	20.618	7	0	26.7	24.6	25.1
[truncated: 2 more columns]
